# Supplementary material for: miRNA-27a is essential for bone remodeling by modulating p62-mediated osteoclast signaling
Source: PubMed Central journal article supplement (PMC9946445; doi:10.7554/elife.79768), 2023-02-08
Supplement: elife-79768-fig6-data2.pdf [file elife-79768-fig6-data2.pdf]

**Please cite:**

I. S. Vlachos, M. D. Paraskevopoulou, D. Karagkouni, G. Georgakilas, T. Vergoulis, I. Kanellos, I-L. Anastasopoulos, S. Maniou, K. Karathanou, D. Kalfakakou, A. Fevgas, T. Dalamagas and A. G. Hatzigeorgiou. DIANA-TarBase v7.0: indexing more than half a million experimentally supported miRNA:mRNA interactions. Nucl. Acids Res. (2014)

**Data Download:**

DIANA-TarBase v7 is available for scientific non-profit and non-commercial use! Download TarBase v7 by following this [link \(http://diana.imis.athena-innovation.gr/DianaTools/data/TarBase7data.tar.gz\)](http://diana.imis.athena-innovation.gr/DianaTools/data/TarBase7data.tar.gz).

mmu-miR-27a-3p

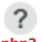

(/DianaTools/index.php?r=site/help&topic=tarbase)

| Gene name      | miRNA name       | Methods | Pred.Score                                                                                                                                                    |
|----------------|------------------|---------|---------------------------------------------------------------------------------------------------------------------------------------------------------------|
| Npepps (mmu) ⓘ | mmu-miR-27a-3p ⓘ | IP      | 0.997<br>(/DianaTools/index.php?r=microT_CDS/results&keywords=mmu-miR-27a-3p%20ENSMUSG00000001441&genes=ENSMUSG00000001441&mirnas=mmu-miR-27a-3p&threshold=0) |
| Npepps (mmu) ⓘ | mmu-miR-27a-3p ⓘ | IP      | 0.997<br>(/DianaTools/index.php?r=microT_CDS/results&keywords=mmu-miR-27a-3p%20ENSMUSG00000001441&genes=ENSMUSG00000001441&mirnas=mmu-miR-27a-3p&threshold=0) |
| Grik3 (mmu) ⓘ  | mmu-miR-27a-3p ⓘ | IP      | 0.985<br>(/DianaTools/index.php?r=microT_CDS/results&keywords=mmu-miR-27a-3p%20ENSMUSG00000001985&genes=ENSMUSG00000001985&mirnas=mmu-miR-27a-3p&threshold=0) |
| Itga5 (mmu) ⓘ  | mmu-miR-27a-3p ⓘ | IP      | 0.966<br>(/DianaTools/index.php?r=microT_CDS/results&keywords=mmu-miR-27a-3p%20ENSMUSG00000000555&genes=ENSMUSG00000000555&mirnas=mmu-miR-27a-3p&threshold=0) |
| Kat2b (mmu) ⓘ  | mmu-miR-27a-3p ⓘ | IP      | 0.946<br>(/DianaTools/index.php?r=microT_CDS/results&keywords=mmu-miR-27a-3p%20ENSMUSG00000000708&genes=ENSMUSG00000000708&mirnas=mmu-miR-27a-3p&threshold=0) |
| Agpat3 (mmu) ⓘ | mmu-miR-27a-3p ⓘ | IP      | 0.933<br>(/DianaTools/index.php?r=microT_CDS/results&keywords=mmu-miR-27a-3p%20ENSMUSG00000001211&genes=ENSMUSG00000001211&mirnas=mmu-miR-27a-3p&threshold=0) |
| Ccm2 (mmu) ⓘ   | mmu-miR-27a-3p ⓘ | IP      | 0.928<br>(/DianaTools/index.php?r=microT_CDS/results&keywords=mmu-miR-27a-3p%20ENSMUSG00000000378&genes=ENSMUSG00000000378&mirnas=mmu-miR-27a-3p&threshold=0) |
| Grin2d (mmu) ⓘ | mmu-miR-27a-3p ⓘ | IP      | 0.903<br>(/DianaTools/index.php?r=microT_CDS/results&keywords=mmu-miR-27a-3p%20ENSMUSG00000002771&genes=ENSMUSG00000002771&mirnas=mmu-miR-27a-3p&threshold=0) |

Related Pathways (<http://snf-515788.vm.okeanos.grnet.gr/dianauniverse/index#mirpath/index#mirnas=mmu-miR-27a-3p&methods=Tarbase&selection=0>)

**Filters**

Species

Method Type

Method

Regulation type

Validation type

Validated as

Source

Publication year  Only publications published after the selected year will be presented.

Apply Filter!

We have placed cookies on your device to help make this website and the services we offer better. By using this site, you agree to the use of cookies. [Learn more](#) (/DianaTools/index.php?r=site/terms)

I accept

|                 |                  |                                                                                      |                                                                                                                                                                                                                                                                                                                                                                  |
|-----------------|------------------|--------------------------------------------------------------------------------------|------------------------------------------------------------------------------------------------------------------------------------------------------------------------------------------------------------------------------------------------------------------------------------------------------------------------------------------------------------------|
| Rmnd5a (mmu) ⓘ  | mmu-miR-27a-3p ⓘ |    | 0.852<br><a href="(/DianaTools/index.php?r=microT_CDS/results&amp;keywords=mmu-miR-27a-3p%20ENSMUSG00000002222&amp;genes=ENSMUSG00000002222&amp;mirnas=mmu-miR-27a-3p&amp;threshold=0)">(/DianaTools/index.php?r=microT_CDS/results&amp;keywords=mmu-miR-27a-3p%20ENSMUSG00000002222&amp;genes=ENSMUSG00000002222&amp;mirnas=mmu-miR-27a-3p&amp;threshold=0)</a> |
| Rmnd5a (mmu) ⓘ  | mmu-miR-27a-3p ⓘ |    | 0.852<br><a href="(/DianaTools/index.php?r=microT_CDS/results&amp;keywords=mmu-miR-27a-3p%20ENSMUSG00000002222&amp;genes=ENSMUSG00000002222&amp;mirnas=mmu-miR-27a-3p&amp;threshold=0)">(/DianaTools/index.php?r=microT_CDS/results&amp;keywords=mmu-miR-27a-3p%20ENSMUSG00000002222&amp;genes=ENSMUSG00000002222&amp;mirnas=mmu-miR-27a-3p&amp;threshold=0)</a> |
| Braf (mmu) ⓘ    | mmu-miR-27a-3p ⓘ |    | 0.818<br><a href="(/DianaTools/index.php?r=microT_CDS/results&amp;keywords=mmu-miR-27a-3p%20ENSMUSG00000002413&amp;genes=ENSMUSG00000002413&amp;mirnas=mmu-miR-27a-3p&amp;threshold=0)">(/DianaTools/index.php?r=microT_CDS/results&amp;keywords=mmu-miR-27a-3p%20ENSMUSG00000002413&amp;genes=ENSMUSG00000002413&amp;mirnas=mmu-miR-27a-3p&amp;threshold=0)</a> |
| Kpnb1 (mmu) ⓘ   | mmu-miR-27a-3p ⓘ |    | 0.811<br><a href="(/DianaTools/index.php?r=microT_CDS/results&amp;keywords=mmu-miR-27a-3p%20ENSMUSG00000001440&amp;genes=ENSMUSG00000001440&amp;mirnas=mmu-miR-27a-3p&amp;threshold=0)">(/DianaTools/index.php?r=microT_CDS/results&amp;keywords=mmu-miR-27a-3p%20ENSMUSG00000001440&amp;genes=ENSMUSG00000001440&amp;mirnas=mmu-miR-27a-3p&amp;threshold=0)</a> |
| Kpnb1 (mmu) ⓘ   | mmu-miR-27a-3p ⓘ |    | 0.811<br><a href="(/DianaTools/index.php?r=microT_CDS/results&amp;keywords=mmu-miR-27a-3p%20ENSMUSG00000001440&amp;genes=ENSMUSG00000001440&amp;mirnas=mmu-miR-27a-3p&amp;threshold=0)">(/DianaTools/index.php?r=microT_CDS/results&amp;keywords=mmu-miR-27a-3p%20ENSMUSG00000001440&amp;genes=ENSMUSG00000001440&amp;mirnas=mmu-miR-27a-3p&amp;threshold=0)</a> |
| Ier3 (mmu) ⓘ    | mmu-miR-27a-3p ⓘ |    | 0.790<br><a href="(/DianaTools/index.php?r=microT_CDS/results&amp;keywords=mmu-miR-27a-3p%20ENSMUSG00000003541&amp;genes=ENSMUSG00000003541&amp;mirnas=mmu-miR-27a-3p&amp;threshold=0)">(/DianaTools/index.php?r=microT_CDS/results&amp;keywords=mmu-miR-27a-3p%20ENSMUSG00000003541&amp;genes=ENSMUSG00000003541&amp;mirnas=mmu-miR-27a-3p&amp;threshold=0)</a> |
| Ell2 (mmu) ⓘ    | mmu-miR-27a-3p ⓘ |   | 0.784<br><a href="(/DianaTools/index.php?r=microT_CDS/results&amp;keywords=mmu-miR-27a-3p%20ENSMUSG00000001542&amp;genes=ENSMUSG00000001542&amp;mirnas=mmu-miR-27a-3p&amp;threshold=0)">(/DianaTools/index.php?r=microT_CDS/results&amp;keywords=mmu-miR-27a-3p%20ENSMUSG00000001542&amp;genes=ENSMUSG00000001542&amp;mirnas=mmu-miR-27a-3p&amp;threshold=0)</a> |
| Sp1 (mmu) ⓘ     | mmu-miR-27a-3p ⓘ |  | 0.770<br><a href="(/DianaTools/index.php?r=microT_CDS/results&amp;keywords=mmu-miR-27a-3p%20ENSMUSG00000001280&amp;genes=ENSMUSG00000001280&amp;mirnas=mmu-miR-27a-3p&amp;threshold=0)">(/DianaTools/index.php?r=microT_CDS/results&amp;keywords=mmu-miR-27a-3p%20ENSMUSG00000001280&amp;genes=ENSMUSG00000001280&amp;mirnas=mmu-miR-27a-3p&amp;threshold=0)</a> |
| Poldip2 (mmu) ⓘ | mmu-miR-27a-3p ⓘ |  | 0.765<br><a href="(/DianaTools/index.php?r=microT_CDS/results&amp;keywords=mmu-miR-27a-3p%20ENSMUSG00000001100&amp;genes=ENSMUSG00000001100&amp;mirnas=mmu-miR-27a-3p&amp;threshold=0)">(/DianaTools/index.php?r=microT_CDS/results&amp;keywords=mmu-miR-27a-3p%20ENSMUSG00000001100&amp;genes=ENSMUSG00000001100&amp;mirnas=mmu-miR-27a-3p&amp;threshold=0)</a> |
| Gria3 (mmu) ⓘ   | mmu-miR-27a-3p ⓘ |  | 0.736<br><a href="(/DianaTools/index.php?r=microT_CDS/results&amp;keywords=mmu-miR-27a-3p%20ENSMUSG00000001986&amp;genes=ENSMUSG00000001986&amp;mirnas=mmu-miR-27a-3p&amp;threshold=0)">(/DianaTools/index.php?r=microT_CDS/results&amp;keywords=mmu-miR-27a-3p%20ENSMUSG00000001986&amp;genes=ENSMUSG00000001986&amp;mirnas=mmu-miR-27a-3p&amp;threshold=0)</a> |
| Dnajc5 (mmu) ⓘ  | mmu-miR-27a-3p ⓘ |  | 0.721<br><a href="(/DianaTools/index.php?r=microT_CDS/results&amp;keywords=mmu-miR-27a-3p%20ENSMUSG00000000826&amp;genes=ENSMUSG00000000826&amp;mirnas=mmu-miR-27a-3p&amp;threshold=0)">(/DianaTools/index.php?r=microT_CDS/results&amp;keywords=mmu-miR-27a-3p%20ENSMUSG00000000826&amp;genes=ENSMUSG00000000826&amp;mirnas=mmu-miR-27a-3p&amp;threshold=0)</a> |

We have placed cookies on your device to help make this website and the services we offer better. By using this site, you agree to the use of cookies. [Learn more](#) ([\(/DianaTools/index.php?r=site/terms\)]((/DianaTools/index.php?r=site/terms)))

I accept

|                 |                  |                                                                                      |                                                                                                                                                                                                                        |
|-----------------|------------------|--------------------------------------------------------------------------------------|------------------------------------------------------------------------------------------------------------------------------------------------------------------------------------------------------------------------|
| Cse1l (mmu) ⓘ   | mmu-miR-27a-3p ⓘ |    | <p><a href="#">0.636</a><br/> <a href="#">(/DianaTools/index.php?r=microT_CDS/results&amp;keywords=mmu-miR-27a-3p%20ENSMUSG00000002718&amp;genes=ENSMUSG00000002718&amp;mirnas=mmu-miR-27a-3p&amp;threshold=0)</a></p> |
| Ranbp2 (mmu) ⓘ  | mmu-miR-27a-3p ⓘ |    | <p><a href="#">0.629</a><br/> <a href="#">(/DianaTools/index.php?r=microT_CDS/results&amp;keywords=mmu-miR-27a-3p%20ENSMUSG00000003226&amp;genes=ENSMUSG00000003226&amp;mirnas=mmu-miR-27a-3p&amp;threshold=0)</a></p> |
| Ranbp2 (mmu) ⓘ  | mmu-miR-27a-3p ⓘ |    | <p><a href="#">0.629</a><br/> <a href="#">(/DianaTools/index.php?r=microT_CDS/results&amp;keywords=mmu-miR-27a-3p%20ENSMUSG00000003226&amp;genes=ENSMUSG00000003226&amp;mirnas=mmu-miR-27a-3p&amp;threshold=0)</a></p> |
| Gna12 (mmu) ⓘ   | mmu-miR-27a-3p ⓘ |    | <p><a href="#">0.624</a><br/> <a href="#">(/DianaTools/index.php?r=microT_CDS/results&amp;keywords=mmu-miR-27a-3p%20ENSMUSG0000000149&amp;genes=ENSMUSG0000000149&amp;mirnas=mmu-miR-27a-3p&amp;threshold=0)</a></p>   |
| Crnk1l (mmu) ⓘ  | mmu-miR-27a-3p ⓘ |    | <p><a href="#">0.618</a><br/> <a href="#">(/DianaTools/index.php?r=microT_CDS/results&amp;keywords=mmu-miR-27a-3p%20ENSMUSG00000001767&amp;genes=ENSMUSG00000001767&amp;mirnas=mmu-miR-27a-3p&amp;threshold=0)</a></p> |
| Plekha3 (mmu) ⓘ | mmu-miR-27a-3p ⓘ |    | <p><a href="#">0.617</a><br/> <a href="#">(/DianaTools/index.php?r=microT_CDS/results&amp;keywords=mmu-miR-27a-3p%20ENSMUSG00000002733&amp;genes=ENSMUSG00000002733&amp;mirnas=mmu-miR-27a-3p&amp;threshold=0)</a></p> |
| Gm2a (mmu) ⓘ    | mmu-miR-27a-3p ⓘ |   | <p><a href="#">0.615</a><br/> <a href="#">(/DianaTools/index.php?r=microT_CDS/results&amp;keywords=mmu-miR-27a-3p%20ENSMUSG00000000594&amp;genes=ENSMUSG00000000594&amp;mirnas=mmu-miR-27a-3p&amp;threshold=0)</a></p> |
| Gm2a (mmu) ⓘ    | mmu-miR-27a-3p ⓘ |  | <p><a href="#">0.615</a><br/> <a href="#">(/DianaTools/index.php?r=microT_CDS/results&amp;keywords=mmu-miR-27a-3p%20ENSMUSG00000000594&amp;genes=ENSMUSG00000000594&amp;mirnas=mmu-miR-27a-3p&amp;threshold=0)</a></p> |
| Kmt2a (mmu) ⓘ   | mmu-miR-27a-3p ⓘ |  | <p><a href="#">0.614</a><br/> <a href="#">(/DianaTools/index.php?r=microT_CDS/results&amp;keywords=mmu-miR-27a-3p%20ENSMUSG00000002028&amp;genes=ENSMUSG00000002028&amp;mirnas=mmu-miR-27a-3p&amp;threshold=0)</a></p> |
| Nacc1 (mmu) ⓘ   | mmu-miR-27a-3p ⓘ |  | <p><a href="#">0.608</a><br/> <a href="#">(/DianaTools/index.php?r=microT_CDS/results&amp;keywords=mmu-miR-27a-3p%20ENSMUSG00000001910&amp;genes=ENSMUSG00000001910)</a></p>                                           |
| Clptm1 (mmu) ⓘ  | mmu-miR-27a-3p ⓘ |  | <p><a href="#">0.588</a><br/> <a href="#">(/DianaTools/index.php?r=microT_CDS/results&amp;keywords=mmu-miR-27a-3p%20ENSMUSG00000002981&amp;genes=ENSMUSG00000002981&amp;mirnas=mmu-miR-27a-3p&amp;threshold=0)</a></p> |

We have placed cookies on your device to help make this website and the services we offer better. By using this site, you agree to the use of cookies. [Learn more](#) ([/DianaTools/index.php?r=site/terms](#)).

I accept

|                 |                  |                                                                                      |                                                                                                                                                                                                                                                                                                                                                                                           |
|-----------------|------------------|--------------------------------------------------------------------------------------|-------------------------------------------------------------------------------------------------------------------------------------------------------------------------------------------------------------------------------------------------------------------------------------------------------------------------------------------------------------------------------------------|
| Klf6 (mmu) ⓘ    | mmu-miR-27a-3p ⓘ |    | <p><a href="#">0.584</a><br/> <a href="(/DianaTools/index.php?r=microT_CDS/results&amp;keywords=mmu-miR-27a-3p%20ENSMUSG00000000078&amp;genes=ENSMUSG00000000078&amp;mirnas=mmu-miR-27a-3p&amp;threshold=0)">(/DianaTools/index.php?r=microT_CDS/results&amp;keywords=mmu-miR-27a-3p%20ENSMUSG00000000078&amp;genes=ENSMUSG00000000078&amp;mirnas=mmu-miR-27a-3p&amp;threshold=0)</a></p> |
| Trim25 (mmu) ⓘ  | mmu-miR-27a-3p ⓘ |    | <p><a href="#">0.583</a><br/> <a href="(/DianaTools/index.php?r=microT_CDS/results&amp;keywords=mmu-miR-27a-3p%20ENSMUSG00000000275&amp;genes=ENSMUSG00000000275&amp;mirnas=mmu-miR-27a-3p&amp;threshold=0)">(/DianaTools/index.php?r=microT_CDS/results&amp;keywords=mmu-miR-27a-3p%20ENSMUSG00000000275&amp;genes=ENSMUSG00000000275&amp;mirnas=mmu-miR-27a-3p&amp;threshold=0)</a></p> |
| Cyth2 (mmu) ⓘ   | mmu-miR-27a-3p ⓘ |    | <p><a href="#">0.574</a><br/> <a href="(/DianaTools/index.php?r=microT_CDS/results&amp;keywords=mmu-miR-27a-3p%20ENSMUSG00000003269&amp;genes=ENSMUSG00000003269&amp;mirnas=mmu-miR-27a-3p&amp;threshold=0)">(/DianaTools/index.php?r=microT_CDS/results&amp;keywords=mmu-miR-27a-3p%20ENSMUSG00000003269&amp;genes=ENSMUSG00000003269&amp;mirnas=mmu-miR-27a-3p&amp;threshold=0)</a></p> |
| Supt6 (mmu) ⓘ   | mmu-miR-27a-3p ⓘ |    | <p><a href="#">0.572</a><br/> <a href="(/DianaTools/index.php?r=microT_CDS/results&amp;keywords=mmu-miR-27a-3p%20ENSMUSG00000002052&amp;genes=ENSMUSG00000002052&amp;mirnas=mmu-miR-27a-3p&amp;threshold=0)">(/DianaTools/index.php?r=microT_CDS/results&amp;keywords=mmu-miR-27a-3p%20ENSMUSG00000002052&amp;genes=ENSMUSG00000002052&amp;mirnas=mmu-miR-27a-3p&amp;threshold=0)</a></p> |
| Abcf3 (mmu) ⓘ   | mmu-miR-27a-3p ⓘ |    | <p><a href="#">0.567</a><br/> <a href="(/DianaTools/index.php?r=microT_CDS/results&amp;keywords=mmu-miR-27a-3p%20ENSMUSG00000003234&amp;genes=ENSMUSG00000003234&amp;mirnas=mmu-miR-27a-3p&amp;threshold=0)">(/DianaTools/index.php?r=microT_CDS/results&amp;keywords=mmu-miR-27a-3p%20ENSMUSG00000003234&amp;genes=ENSMUSG00000003234&amp;mirnas=mmu-miR-27a-3p&amp;threshold=0)</a></p> |
| Cdkn1b (mmu) ⓘ  | mmu-miR-27a-3p ⓘ |    | <p><a href="#">0.557</a><br/> <a href="(/DianaTools/index.php?r=microT_CDS/results&amp;keywords=mmu-miR-27a-3p%20ENSMUSG00000003031&amp;genes=ENSMUSG00000003031&amp;mirnas=mmu-miR-27a-3p&amp;threshold=0)">(/DianaTools/index.php?r=microT_CDS/results&amp;keywords=mmu-miR-27a-3p%20ENSMUSG00000003031&amp;genes=ENSMUSG00000003031&amp;mirnas=mmu-miR-27a-3p&amp;threshold=0)</a></p> |
| Cyp51 (mmu) ⓘ   | mmu-miR-27a-3p ⓘ |    | <p><a href="#">0.556</a><br/> <a href="(/DianaTools/index.php?r=microT_CDS/results&amp;keywords=mmu-miR-27a-3p%20ENSMUSG00000001467&amp;genes=ENSMUSG00000001467&amp;mirnas=mmu-miR-27a-3p&amp;threshold=0)">(/DianaTools/index.php?r=microT_CDS/results&amp;keywords=mmu-miR-27a-3p%20ENSMUSG00000001467&amp;genes=ENSMUSG00000001467&amp;mirnas=mmu-miR-27a-3p&amp;threshold=0)</a></p> |
| Cyp51 (mmu) ⓘ   | mmu-miR-27a-3p ⓘ |  | <p><a href="#">0.556</a><br/> <a href="(/DianaTools/index.php?r=microT_CDS/results&amp;keywords=mmu-miR-27a-3p%20ENSMUSG00000001467&amp;genes=ENSMUSG00000001467&amp;mirnas=mmu-miR-27a-3p&amp;threshold=0)">(/DianaTools/index.php?r=microT_CDS/results&amp;keywords=mmu-miR-27a-3p%20ENSMUSG00000001467&amp;genes=ENSMUSG00000001467&amp;mirnas=mmu-miR-27a-3p&amp;threshold=0)</a></p> |
| Ap2a2 (mmu) ⓘ   | mmu-miR-27a-3p ⓘ |  | <p><a href="#">0.535</a><br/> <a href="(/DianaTools/index.php?r=microT_CDS/results&amp;keywords=mmu-miR-27a-3p%20ENSMUSG00000002957&amp;genes=ENSMUSG00000002957&amp;mirnas=mmu-miR-27a-3p&amp;threshold=0)">(/DianaTools/index.php?r=microT_CDS/results&amp;keywords=mmu-miR-27a-3p%20ENSMUSG00000002957&amp;genes=ENSMUSG00000002957&amp;mirnas=mmu-miR-27a-3p&amp;threshold=0)</a></p> |
| Mxd1 (mmu) ⓘ    | mmu-miR-27a-3p ⓘ |  | <p><a href="#">0.508</a><br/> <a href="(/DianaTools/index.php?r=microT_CDS/results&amp;keywords=mmu-miR-27a-3p%20ENSMUSG00000001156&amp;genes=ENSMUSG00000001156&amp;mirnas=mmu-miR-27a-3p&amp;threshold=0)">(/DianaTools/index.php?r=microT_CDS/results&amp;keywords=mmu-miR-27a-3p%20ENSMUSG00000001156&amp;genes=ENSMUSG00000001156&amp;mirnas=mmu-miR-27a-3p&amp;threshold=0)</a></p> |
| Hdgfrp2 (mmu) ⓘ | mmu-miR-27a-3p ⓘ |  | <p><a href="#">0.505</a><br/> <a href="(/DianaTools/index.php?r=microT_CDS/results&amp;keywords=mmu-miR-27a-3p%20ENSMUSG00000002833&amp;genes=ENSMUSG00000002833&amp;mirnas=mmu-miR-27a-3p&amp;threshold=0)">(/DianaTools/index.php?r=microT_CDS/results&amp;keywords=mmu-miR-27a-3p%20ENSMUSG00000002833&amp;genes=ENSMUSG00000002833&amp;mirnas=mmu-miR-27a-3p&amp;threshold=0)</a></p> |

We have placed cookies on your device to help make this website and the services we offer better. By using this site, you agree to the use of cookies. [Learn more](#) ([/DianaTools/index.php?r=site/terms]((/DianaTools/index.php?r=site/terms))).

I accept

|                 |                  |                                                                                      |                                                                                                                                                                                                                                                                                                                                                                                           |
|-----------------|------------------|--------------------------------------------------------------------------------------|-------------------------------------------------------------------------------------------------------------------------------------------------------------------------------------------------------------------------------------------------------------------------------------------------------------------------------------------------------------------------------------------|
| Ugp2 (mmu) ⓘ    | mmu-miR-27a-3p ⓘ |    | 0.505<br><a href="(/DianaTools/index.php?r=microT_CDS/results&amp;keywords=mmu-miR-27a-3p%20ENSMUSG00000001891&amp;genes=ENSMUSG00000001891&amp;mirnas=mmu-miR-27a-3p&amp;threshold=0)">(/DianaTools/index.php?<br/>r=microT_CDS/results&amp;keywords=mmu-<br/>miR-27a-<br/>3p%20ENSMUSG00000001891&amp;genes=ENSMUSG00000001891&amp;mirnas=mmu-<br/>miR-27a-<br/>3p&amp;threshold=0)</a> |
| Znf512b (mmu) ⓘ | mmu-miR-27a-3p ⓘ |    | 0.504<br><a href="(/DianaTools/index.php?r=microT_CDS/results&amp;keywords=mmu-miR-27a-3p%20ENSMUSG00000000823&amp;genes=ENSMUSG00000000823&amp;mirnas=mmu-miR-27a-3p&amp;threshold=0)">(/DianaTools/index.php?<br/>r=microT_CDS/results&amp;keywords=mmu-<br/>miR-27a-<br/>3p%20ENSMUSG00000000823&amp;genes=ENSMUSG00000000823&amp;mirnas=mmu-<br/>miR-27a-<br/>3p&amp;threshold=0)</a> |
| Peg3 (mmu) ⓘ    | mmu-miR-27a-3p ⓘ |    | 0.500<br><a href="(/DianaTools/index.php?r=microT_CDS/results&amp;keywords=mmu-miR-27a-3p%20ENSMUSG00000002265&amp;genes=ENSMUSG00000002265&amp;mirnas=mmu-miR-27a-3p&amp;threshold=0)">(/DianaTools/index.php?<br/>r=microT_CDS/results&amp;keywords=mmu-<br/>miR-27a-<br/>3p%20ENSMUSG00000002265&amp;genes=ENSMUSG00000002265&amp;mirnas=mmu-<br/>miR-27a-<br/>3p&amp;threshold=0)</a> |
| Slc2a3 (mmu) ⓘ  | mmu-miR-27a-3p ⓘ |    | 0.495<br><a href="(/DianaTools/index.php?r=microT_CDS/results&amp;keywords=mmu-miR-27a-3p%20ENSMUSG00000003153&amp;genes=ENSMUSG00000003153&amp;mirnas=mmu-miR-27a-3p&amp;threshold=0)">(/DianaTools/index.php?<br/>r=microT_CDS/results&amp;keywords=mmu-<br/>miR-27a-<br/>3p%20ENSMUSG00000003153&amp;genes=ENSMUSG00000003153&amp;mirnas=mmu-<br/>miR-27a-<br/>3p&amp;threshold=0)</a> |
| Rpa1 (mmu) ⓘ    | mmu-miR-27a-3p ⓘ |    | 0.480<br><a href="(/DianaTools/index.php?r=microT_CDS/results&amp;keywords=mmu-miR-27a-3p%20ENSMUSG0000000751&amp;genes=ENSMUSG0000000751&amp;mirnas=mmu-miR-27a-3p&amp;threshold=0)">(/DianaTools/index.php?<br/>r=microT_CDS/results&amp;keywords=mmu-<br/>miR-27a-<br/>3p%20ENSMUSG0000000751&amp;genes=ENSMUSG0000000751&amp;mirnas=mmu-<br/>miR-27a-<br/>3p&amp;threshold=0)</a>     |
| Tubgc3 (mmu) ⓘ  | mmu-miR-27a-3p ⓘ |    | 0.479<br><a href="(/DianaTools/index.php?r=microT_CDS/results&amp;keywords=mmu-miR-27a-3p%20ENSMUSG0000000759&amp;genes=ENSMUSG0000000759&amp;mirnas=mmu-miR-27a-3p&amp;threshold=0)">(/DianaTools/index.php?<br/>r=microT_CDS/results&amp;keywords=mmu-<br/>miR-27a-<br/>3p%20ENSMUSG0000000759&amp;genes=ENSMUSG0000000759&amp;mirnas=mmu-<br/>miR-27a-<br/>3p&amp;threshold=0)</a>     |
| Sri (mmu) ⓘ     | mmu-miR-27a-3p ⓘ |    | 0.479<br><a href="(/DianaTools/index.php?r=microT_CDS/results&amp;keywords=mmu-miR-27a-3p%20ENSMUSG00000003161&amp;genes=ENSMUSG00000003161&amp;mirnas=mmu-miR-27a-3p&amp;threshold=0)">(/DianaTools/index.php?<br/>r=microT_CDS/results&amp;keywords=mmu-<br/>miR-27a-<br/>3p%20ENSMUSG00000003161&amp;genes=ENSMUSG00000003161&amp;mirnas=mmu-<br/>miR-27a-<br/>3p&amp;threshold=0)</a> |
| Grk5 (mmu) ⓘ    | mmu-miR-27a-3p ⓘ |  | 0.477<br><a href="(/DianaTools/index.php?r=microT_CDS/results&amp;keywords=mmu-miR-27a-3p%20ENSMUSG00000003228&amp;genes=ENSMUSG00000003228&amp;mirnas=mmu-miR-27a-3p&amp;threshold=0)">(/DianaTools/index.php?<br/>r=microT_CDS/results&amp;keywords=mmu-<br/>miR-27a-<br/>3p%20ENSMUSG00000003228&amp;genes=ENSMUSG00000003228&amp;mirnas=mmu-<br/>miR-27a-<br/>3p&amp;threshold=0)</a> |
| Fkbp7 (mmu) ⓘ   | mmu-miR-27a-3p ⓘ |  | 0.467<br><a href="(/DianaTools/index.php?r=microT_CDS/results&amp;keywords=mmu-miR-27a-3p%20ENSMUSG00000002732&amp;genes=ENSMUSG00000002732&amp;mirnas=mmu-miR-27a-3p&amp;threshold=0)">(/DianaTools/index.php?<br/>r=microT_CDS/results&amp;keywords=mmu-<br/>miR-27a-<br/>3p%20ENSMUSG00000002732&amp;genes=ENSMUSG00000002732&amp;mirnas=mmu-<br/>miR-27a-<br/>3p&amp;threshold=0)</a> |
| Narf (mmu) ⓘ    | mmu-miR-27a-3p ⓘ |  | 0.456<br><a href="(/DianaTools/index.php?r=microT_CDS/results&amp;keywords=mmu-miR-27a-3p%20ENSMUSG00000000056&amp;genes=ENSMUSG00000000056&amp;mirnas=mmu-miR-27a-3p&amp;threshold=0)">(/DianaTools/index.php?<br/>r=microT_CDS/results&amp;keywords=mmu-<br/>miR-27a-<br/>3p%20ENSMUSG00000000056&amp;genes=ENSMUSG00000000056&amp;mirnas=mmu-<br/>miR-27a-<br/>3p&amp;threshold=0)</a> |
| Paxip1 (mmu) ⓘ  | mmu-miR-27a-3p ⓘ |  | 0.456<br><a href="(/DianaTools/index.php?r=microT_CDS/results&amp;keywords=mmu-miR-27a-3p%20ENSMUSG00000002221&amp;genes=ENSMUSG00000002221&amp;mirnas=mmu-miR-27a-3p&amp;threshold=0)">(/DianaTools/index.php?<br/>r=microT_CDS/results&amp;keywords=mmu-<br/>miR-27a-<br/>3p%20ENSMUSG00000002221&amp;genes=ENSMUSG00000002221&amp;mirnas=mmu-<br/>miR-27a-<br/>3p&amp;threshold=0)</a> |

We have placed cookies on your device to help make this website and the services we offer better. By using this site, you agree to the use of cookies. [Learn more](#) ([\(/DianaTools/index.php?r=site/terms\)]((/DianaTools/index.php?r=site/terms))).

I accept

|                  |                  |  |    |                                                                                                                                                                                  |
|------------------|------------------|--|----|----------------------------------------------------------------------------------------------------------------------------------------------------------------------------------|
|                  |                  |  |    | 0.451<br>(/DianaTools/index.php?<br>r=miroT_CDS/results&keywords=mmu-<br>miR-27a-<br>3p%20ENSMUSG00000003402&genes=ENSMUSG00000003402&mirnas=mmu-<br>miR-27a-<br>3p&threshold=0) |
| Prkcsh (mmu) ⓘ   | mmu-miR-27a-3p ⓘ |  | IP |                                                                                                                                                                                  |
| Vrk3 (mmu) ⓘ     | mmu-miR-27a-3p ⓘ |  | IP | -                                                                                                                                                                                |
| Lgals9 (mmu) ⓘ   | mmu-miR-27a-3p ⓘ |  | IP | -                                                                                                                                                                                |
| Wdr77 (mmu) ⓘ    | mmu-miR-27a-3p ⓘ |  | IP | -                                                                                                                                                                                |
| Irf9 (mmu) ⓘ     | mmu-miR-27a-3p ⓘ |  | IP | -                                                                                                                                                                                |
| Celf2 (mmu) ⓘ    | mmu-miR-27a-3p ⓘ |  | IP | -                                                                                                                                                                                |
| Il16 (mmu) ⓘ     | mmu-miR-27a-3p ⓘ |  | IP | -                                                                                                                                                                                |
| Xpo6 (mmu) ⓘ     | mmu-miR-27a-3p ⓘ |  | IP | -                                                                                                                                                                                |
| Tspan32 (mmu) ⓘ  | mmu-miR-27a-3p ⓘ |  | IP | -                                                                                                                                                                                |
| Cse1l (mmu) ⓘ    | mmu-miR-27a-3p ⓘ |  | IP | -                                                                                                                                                                                |
| Slc39a13 (mmu) ⓘ | mmu-miR-27a-3p ⓘ |  | IP | -                                                                                                                                                                                |
| Cd97 (mmu) ⓘ     | mmu-miR-27a-3p ⓘ |  | IP | -                                                                                                                                                                                |
| Ap4e1 (mmu) ⓘ    | mmu-miR-27a-3p ⓘ |  | IP | -                                                                                                                                                                                |
| Col18a1 (mmu) ⓘ  | mmu-miR-27a-3p ⓘ |  | IP | -                                                                                                                                                                                |
| Puf60 (mmu) ⓘ    | mmu-miR-27a-3p ⓘ |  | IP | -                                                                                                                                                                                |
| Hbp1 (mmu) ⓘ     | mmu-miR-27a-3p ⓘ |  | IP | -                                                                                                                                                                                |
| Sept7 (mmu) ⓘ    | mmu-miR-27a-3p ⓘ |  | IP | -                                                                                                                                                                                |
| Tubb5 (mmu) ⓘ    | mmu-miR-27a-3p ⓘ |  | IP | -                                                                                                                                                                                |
| Tubb5 (mmu) ⓘ    | mmu-miR-27a-3p ⓘ |  | IP | -                                                                                                                                                                                |
| Pafah1b2 (mmu) ⓘ | mmu-miR-27a-3p ⓘ |  | IP | -                                                                                                                                                                                |
| Rin2 (mmu) ⓘ     | mmu-miR-27a-3p ⓘ |  | IP | -                                                                                                                                                                                |
| Dgcr2 (mmu) ⓘ    | mmu-miR-27a-3p ⓘ |  | IP | -                                                                                                                                                                                |
| Ncan (mmu) ⓘ     | mmu-miR-27a-3p ⓘ |  | IP | -                                                                                                                                                                                |
| Ift20 (mmu) ⓘ    | mmu-miR-27a-3p ⓘ |  | IP | -                                                                                                                                                                                |
| Ccnd2 (mmu) ⓘ    | mmu-miR-27a-3p ⓘ |  | IP | -                                                                                                                                                                                |
| Ccnd2 (mmu) ⓘ    | mmu-miR-27a-3p ⓘ |  | IP | -                                                                                                                                                                                |
| Tiam1 (mmu) ⓘ    | mmu-miR-27a-3p ⓘ |  | IP | -                                                                                                                                                                                |
| Ftcd (mmu) ⓘ     | mmu-miR-27a-3p ⓘ |  | IP | -                                                                                                                                                                                |
| Itgb2 (mmu) ⓘ    | mmu-miR-27a-3p ⓘ |  | IP | -                                                                                                                                                                                |
| Map2k7 (mmu) ⓘ   | mmu-miR-27a-3p ⓘ |  | IP | -                                                                                                                                                                                |

We have placed cookies on your device to help make this website and the services we offer better. By using this site, you agree to the use of cookies. [Learn more](#) (/DianaTools/index.php?r=site/terms).

I accept

|                  |                  |    |                                                                                                                                                                                              |
|------------------|------------------|----|----------------------------------------------------------------------------------------------------------------------------------------------------------------------------------------------|
| Celf2 (mmu) ⓘ    | mmu-miR-27a-3p ⓘ | IP | -                                                                                                                                                                                            |
| Paf1 (mmu) ⓘ     | mmu-miR-27a-3p ⓘ | IP | -                                                                                                                                                                                            |
| Pon1 (mmu) ⓘ     | mmu-miR-27a-3p ⓘ | IP | -                                                                                                                                                                                            |
| Elavl3 (mmu) ⓘ   | mmu-miR-27a-3p ⓘ | IP | -                                                                                                                                                                                            |
| Prpf6 (mmu) ⓘ    | mmu-miR-27a-3p ⓘ | IP | -                                                                                                                                                                                            |
| Kdelr1 (mmu) ⓘ   | mmu-miR-27a-3p ⓘ | IP | -                                                                                                                                                                                            |
| Cdk12 (mmu) ⓘ    | mmu-miR-27a-3p ⓘ | IP | -                                                                                                                                                                                            |
| Dbt (mmu) ⓘ      | mmu-miR-27a-3p ⓘ | IP | -                                                                                                                                                                                            |
| Mid2 (mmu) ⓘ     | mmu-miR-27a-3p ⓘ | IP | -                                                                                                                                                                                            |
| Tfe3 (mmu) ⓘ     | mmu-miR-27a-3p ⓘ | IP | -                                                                                                                                                                                            |
| Mcm3ap (mmu) ⓘ   | mmu-miR-27a-3p ⓘ | IP | -                                                                                                                                                                                            |
| Dnajc5 (mmu) ⓘ   | mmu-miR-27a-3p ⓘ | IP | -                                                                                                                                                                                            |
| Efnb2 (mmu) ⓘ    | mmu-miR-27a-3p ⓘ | IP | -                                                                                                                                                                                            |
| Ddb2 (mmu) ⓘ     | mmu-miR-27a-3p ⓘ | IP | -                                                                                                                                                                                            |
| Clpb (mmu) ⓘ     | mmu-miR-27a-3p ⓘ | IP | -                                                                                                                                                                                            |
| Jag2 (mmu) ⓘ     | mmu-miR-27a-3p ⓘ | IP | -                                                                                                                                                                                            |
| Slc25a42 (mmu) ⓘ | mmu-miR-27a-3p ⓘ | IP | -                                                                                                                                                                                            |
| Snrpd1 (mmu) ⓘ   | mmu-miR-27a-3p ⓘ | IP | -                                                                                                                                                                                            |
| Mmd (mmu) ⓘ      | mmu-miR-27a-3p ⓘ | IP | 0.996<br><a href="#">(/DianaTools/index.php?r=miroT_CDS/results&amp;keywords=mmu-miR-27a-3p%20ENSMUSG00000003948&amp;genes=ENSMUSG00000003948&amp;mirnas=mmu-miR-27a-3p&amp;threshold=0)</a> |
| Tnp01 (mmu) ⓘ    | mmu-miR-27a-3p ⓘ | IP | 0.981<br><a href="#">(/DianaTools/index.php?r=miroT_CDS/results&amp;keywords=mmu-miR-27a-3p%20ENSMUSG00000009470&amp;genes=ENSMUSG00000009470&amp;mirnas=mmu-miR-27a-3p&amp;threshold=0)</a> |
| Vav2 (mmu) ⓘ     | mmu-miR-27a-3p ⓘ | IP | 0.966<br><a href="#">(/DianaTools/index.php?r=miroT_CDS/results&amp;keywords=mmu-miR-27a-3p%20ENSMUSG00000009621&amp;genes=ENSMUSG00000009621&amp;mirnas=mmu-miR-27a-3p&amp;threshold=0)</a> |
| Fzd3 (mmu) ⓘ     | mmu-miR-27a-3p ⓘ | IP | 0.960<br><a href="#">(/DianaTools/index.php?r=miroT_CDS/results&amp;keywords=mmu-miR-27a-3p%20ENSMUSG00000007989&amp;genes=ENSMUSG00000007989&amp;mirnas=mmu-miR-27a-3p&amp;threshold=0)</a> |
| Ctcf (mmu) ⓘ     | mmu-miR-27a-3p ⓘ | IP | 0.933<br><a href="#">(/DianaTools/index.php?r=miroT_CDS/results&amp;keywords=mmu-miR-27a-3p%20ENSMUSG00000005698&amp;genes=ENSMUSG00000005698&amp;mirnas=mmu-miR-27a-3p&amp;threshold=0)</a> |

We have placed cookies on your device to help make this website and the services we offer better. By using this site, you agree to the use of cookies. [Learn more](#) ([/DianaTools/index.php?r=site/terms](#)).

I accept

|                |                  |                                                                                      |                                                                                                                                                                                                                        |
|----------------|------------------|--------------------------------------------------------------------------------------|------------------------------------------------------------------------------------------------------------------------------------------------------------------------------------------------------------------------|
| Ruvbl2 (mmu) ⓘ | mmu-miR-27a-3p ⓘ |    | <p><a href="#">0.922</a><br/> <a href="#">(/DianaTools/index.php?r=microT_CDS/results&amp;keywords=mmu-miR-27a-3p%20ENSMUSG00000003868&amp;genes=ENSMUSG00000003868&amp;mirnas=mmu-miR-27a-3p&amp;threshold=0)</a></p> |
| Nfat5 (mmu) ⓘ  | mmu-miR-27a-3p ⓘ |    | <p><a href="#">0.911</a><br/> <a href="#">(/DianaTools/index.php?r=microT_CDS/results&amp;keywords=mmu-miR-27a-3p%20ENSMUSG00000003847&amp;genes=ENSMUSG00000003847&amp;mirnas=mmu-miR-27a-3p&amp;threshold=0)</a></p> |
| Tfam (mmu) ⓘ   | mmu-miR-27a-3p ⓘ |    | <p><a href="#">0.905</a><br/> <a href="#">(/DianaTools/index.php?r=microT_CDS/results&amp;keywords=mmu-miR-27a-3p%20ENSMUSG00000003923&amp;genes=ENSMUSG00000003923&amp;mirnas=mmu-miR-27a-3p&amp;threshold=0)</a></p> |
| Ii7r (mmu) ⓘ   | mmu-miR-27a-3p ⓘ |    | <p><a href="#">0.892</a><br/> <a href="#">(/DianaTools/index.php?r=microT_CDS/results&amp;keywords=mmu-miR-27a-3p%20ENSMUSG00000003882&amp;genes=ENSMUSG00000003882&amp;mirnas=mmu-miR-27a-3p&amp;threshold=0)</a></p> |
| Khsrp (mmu) ⓘ  | mmu-miR-27a-3p ⓘ |    | <p><a href="#">0.889</a><br/> <a href="#">(/DianaTools/index.php?r=microT_CDS/results&amp;keywords=mmu-miR-27a-3p%20ENSMUSG00000007670&amp;genes=ENSMUSG00000007670&amp;mirnas=mmu-miR-27a-3p&amp;threshold=0)</a></p> |
| Mob1b (mmu) ⓘ  | mmu-miR-27a-3p ⓘ |    | <p><a href="#">0.860</a><br/> <a href="#">(/DianaTools/index.php?r=microT_CDS/results&amp;keywords=mmu-miR-27a-3p%20ENSMUSG00000006262&amp;genes=ENSMUSG00000006262&amp;mirnas=mmu-miR-27a-3p&amp;threshold=0)</a></p> |
| Mob1b (mmu) ⓘ  | mmu-miR-27a-3p ⓘ |   | <p><a href="#">0.860</a><br/> <a href="#">(/DianaTools/index.php?r=microT_CDS/results&amp;keywords=mmu-miR-27a-3p%20ENSMUSG00000006262&amp;genes=ENSMUSG00000006262&amp;mirnas=mmu-miR-27a-3p&amp;threshold=0)</a></p> |
| Cdip1 (mmu) ⓘ  | mmu-miR-27a-3p ⓘ |  | <p><a href="#">0.809</a><br/> <a href="#">(/DianaTools/index.php?r=microT_CDS/results&amp;keywords=mmu-miR-27a-3p%20ENSMUSG00000004071&amp;genes=ENSMUSG00000004071&amp;mirnas=mmu-miR-27a-3p&amp;threshold=0)</a></p> |
| Met (mmu) ⓘ    | mmu-miR-27a-3p ⓘ |  | <p><a href="#">0.792</a><br/> <a href="#">(/DianaTools/index.php?r=microT_CDS/results&amp;keywords=mmu-miR-27a-3p%20ENSMUSG00000009376&amp;genes=ENSMUSG00000009376&amp;mirnas=mmu-miR-27a-3p&amp;threshold=0)</a></p> |
| Rnmt (mmu) ⓘ   | mmu-miR-27a-3p ⓘ |  | <p><a href="#">0.782</a><br/> <a href="#">(/DianaTools/index.php?r=microT_CDS/results&amp;keywords=mmu-miR-27a-3p%20ENSMUSG00000009535&amp;genes=ENSMUSG00000009535&amp;mirnas=mmu-miR-27a-3p&amp;threshold=0)</a></p> |
| Myt1 (mmu) ⓘ   | mmu-miR-27a-3p ⓘ |  | <p><a href="#">0.774</a><br/> <a href="#">(/DianaTools/index.php?r=microT_CDS/results&amp;keywords=mmu-miR-27a-3p%20ENSMUSG00000010505&amp;genes=ENSMUSG00000010505&amp;mirnas=mmu-miR-27a-3p&amp;threshold=0)</a></p> |

We have placed cookies on your device to help make this website and the services we offer better. By using this site, you agree to the use of cookies. [Learn more](#) ([/DianaTools/index.php?r=site/terms](#)).

I accept



|                 |                  |    |                                                                                                                                                                                   |
|-----------------|------------------|----|-----------------------------------------------------------------------------------------------------------------------------------------------------------------------------------|
| Tax1bp1 (mmu) ⓘ | mmu-miR-27a-3p ⓘ | IP | 0.770<br>(/DianaTools/index.php?<br>r=microT_CDS/results&keywords=mmu-<br>miR-27a-<br>3p%20ENSMUSG00000004535&genes=ENSMUSG00000004535&mirnas=mmu-<br>miR-27a-<br>3p&threshold=0) |
| Tax1bp1 (mmu) ⓘ | mmu-miR-27a-3p ⓘ | IP | 0.770<br>(/DianaTools/index.php?<br>r=microT_CDS/results&keywords=mmu-<br>miR-27a-<br>3p%20ENSMUSG00000004535&genes=ENSMUSG00000004535&mirnas=mmu-<br>miR-27a-<br>3p&threshold=0) |
| Tgfr1 (mmu) ⓘ   | mmu-miR-27a-3p ⓘ | IP | 0.743<br>(/DianaTools/index.php?<br>r=microT_CDS/results&keywords=mmu-<br>miR-27a-<br>3p%20ENSMUSG00000007613&genes=ENSMUSG00000007613&mirnas=mmu-<br>miR-27a-<br>3p&threshold=0) |
| Srpk1 (mmu) ⓘ   | mmu-miR-27a-3p ⓘ | IP | 0.706<br>(/DianaTools/index.php?<br>r=microT_CDS/results&keywords=mmu-<br>miR-27a-<br>3p%20ENSMUSG00000004865&genes=ENSMUSG00000004865&mirnas=mmu-<br>miR-27a-<br>3p&threshold=0) |
| Srpk1 (mmu) ⓘ   | mmu-miR-27a-3p ⓘ | IP | 0.706<br>(/DianaTools/index.php?<br>r=microT_CDS/results&keywords=mmu-<br>miR-27a-<br>3p%20ENSMUSG00000004865&genes=ENSMUSG00000004865&mirnas=mmu-<br>miR-27a-<br>3p&threshold=0) |
| Zfp655 (mmu) ⓘ  | mmu-miR-27a-3p ⓘ | IP | 0.699<br>(/DianaTools/index.php?<br>r=microT_CDS/results&keywords=mmu-<br>miR-27a-<br>3p%20ENSMUSG00000007812&genes=ENSMUSG00000007812&mirnas=mmu-<br>miR-27a-<br>3p&threshold=0) |
| Ndr2 (mmu) ⓘ    | mmu-miR-27a-3p ⓘ | IP | 0.692<br>(/DianaTools/index.php?<br>r=microT_CDS/results&keywords=mmu-<br>miR-27a-<br>3p%20ENSMUSG00000004558&genes=ENSMUSG00000004558&mirnas=mmu-<br>miR-27a-<br>3p&threshold=0) |
| Cbx5 (mmu) ⓘ    | mmu-miR-27a-3p ⓘ | IP | 0.680<br>(/DianaTools/index.php?<br>r=microT_CDS/results&keywords=mmu-<br>miR-27a-<br>3p%20ENSMUSG00000009575&genes=ENSMUSG00000009575&mirnas=mmu-<br>miR-27a-<br>3p&threshold=0) |
| Arpp19 (mmu) ⓘ  | mmu-miR-27a-3p ⓘ | IP | 0.679<br>(/DianaTools/index.php?<br>r=microT_CDS/results&keywords=mmu-<br>miR-27a-<br>3p%20ENSMUSG00000007656&genes=ENSMUSG00000007656&mirnas=mmu-<br>miR-27a-<br>3p&threshold=0) |
| Brd8 (mmu) ⓘ    | mmu-miR-27a-3p ⓘ | IP | 0.662<br>(/DianaTools/index.php?<br>r=microT_CDS/results&keywords=mmu-<br>miR-27a-<br>3p%20ENSMUSG00000003778&genes=ENSMUSG00000003778&mirnas=mmu-<br>miR-27a-<br>3p&threshold=0) |
| Ctr9 (mmu) ⓘ    | mmu-miR-27a-3p ⓘ | IP | 0.659<br>(/DianaTools/index.php?<br>r=microT_CDS/results&keywords=mmu-<br>miR-27a-<br>3p%20ENSMUSG00000005609&genes=ENSMUSG00000005609&mirnas=mmu-<br>miR-27a-<br>3p&threshold=0) |

We have placed cookies on your device to help make this website and the services we offer better. By using this site, you agree to the use of cookies. [Learn more](#) (</DianaTools/index.php?r=site/terms>).

I accept

|                |                  |                                                                                      |                                                                                                                                                                                              |
|----------------|------------------|--------------------------------------------------------------------------------------|----------------------------------------------------------------------------------------------------------------------------------------------------------------------------------------------|
| Ulk2 (mmu) ⓘ   | mmu-miR-27a-3p ⓘ |    | 0.658<br><a href="#">(/DianaTools/index.php?r=miroT_CDS/results&amp;keywords=mmu-miR-27a-3p%20ENSMUSG00000004798&amp;genes=ENSMUSG00000004798&amp;mirnas=mmu-miR-27a-3p&amp;threshold=0)</a> |
| Ncoa2 (mmu) ⓘ  | mmu-miR-27a-3p ⓘ |    | 0.644<br><a href="#">(/DianaTools/index.php?r=miroT_CDS/results&amp;keywords=mmu-miR-27a-3p%20ENSMUSG00000005886&amp;genes=ENSMUSG00000005886&amp;mirnas=mmu-miR-27a-3p&amp;threshold=0)</a> |
| Pkn2 (mmu) ⓘ   | mmu-miR-27a-3p ⓘ |    | 0.644<br><a href="#">(/DianaTools/index.php?r=miroT_CDS/results&amp;keywords=mmu-miR-27a-3p%20ENSMUSG00000004591&amp;genes=ENSMUSG00000004591&amp;mirnas=mmu-miR-27a-3p&amp;threshold=0)</a> |
| Crot (mmu) ⓘ   | mmu-miR-27a-3p ⓘ |    | 0.624<br><a href="#">(/DianaTools/index.php?r=miroT_CDS/results&amp;keywords=mmu-miR-27a-3p%20ENSMUSG00000003623&amp;genes=ENSMUSG00000003623&amp;mirnas=mmu-miR-27a-3p&amp;threshold=0)</a> |
| Kpna6 (mmu) ⓘ  | mmu-miR-27a-3p ⓘ |    | 0.620<br><a href="#">(/DianaTools/index.php?r=miroT_CDS/results&amp;keywords=mmu-miR-27a-3p%20ENSMUSG00000003731&amp;genes=ENSMUSG00000003731&amp;mirnas=mmu-miR-27a-3p&amp;threshold=0)</a> |
| Man1a (mmu) ⓘ  | mmu-miR-27a-3p ⓘ |    | 0.613<br><a href="#">(/DianaTools/index.php?r=miroT_CDS/results&amp;keywords=mmu-miR-27a-3p%20ENSMUSG00000003746&amp;genes=ENSMUSG00000003746&amp;mirnas=mmu-miR-27a-3p&amp;threshold=0)</a> |
| Mkl2 (mmu) ⓘ   | mmu-miR-27a-3p ⓘ |    | 0.600<br><a href="#">(/DianaTools/index.php?r=miroT_CDS/results&amp;keywords=mmu-miR-27a-3p%20ENSMUSG00000009569&amp;genes=ENSMUSG00000009569&amp;mirnas=mmu-miR-27a-3p&amp;threshold=0)</a> |
| Vps4b (mmu) ⓘ  | mmu-miR-27a-3p ⓘ |  | 0.596<br><a href="#">(/DianaTools/index.php?r=miroT_CDS/results&amp;keywords=mmu-miR-27a-3p%20ENSMUSG00000009907&amp;genes=ENSMUSG00000009907&amp;mirnas=mmu-miR-27a-3p&amp;threshold=0)</a> |
| Ikbkg (mmu) ⓘ  | mmu-miR-27a-3p ⓘ |  | 0.591<br><a href="#">(/DianaTools/index.php?r=miroT_CDS/results&amp;keywords=mmu-miR-27a-3p%20ENSMUSG00000004221&amp;genes=ENSMUSG00000004221&amp;mirnas=mmu-miR-27a-3p&amp;threshold=0)</a> |
| Pou6f2 (mmu) ⓘ | mmu-miR-27a-3p ⓘ |  | 0.591<br><a href="#">(/DianaTools/index.php?r=miroT_CDS/results&amp;keywords=mmu-miR-27a-3p%20ENSMUSG00000009734&amp;genes=ENSMUSG00000009734&amp;mirnas=mmu-miR-27a-3p&amp;threshold=0)</a> |
| Pdk1 (mmu) ⓘ   | mmu-miR-27a-3p ⓘ |  | 0.565<br><a href="#">(/DianaTools/index.php?r=miroT_CDS/results&amp;keywords=mmu-miR-27a-3p%20ENSMUSG00000006494&amp;genes=ENSMUSG00000006494&amp;mirnas=mmu-miR-27a-3p&amp;threshold=0)</a> |

We have placed cookies on your device to help make this website and the services we offer better. By using this site, you agree to the use of cookies. [Learn more](#) ([/DianaTools/index.php?r=site/terms](#)).

I accept

|                      |                  |                                                                                      |                                                                                                                                                                                                                                                                                                                                                                                           |
|----------------------|------------------|--------------------------------------------------------------------------------------|-------------------------------------------------------------------------------------------------------------------------------------------------------------------------------------------------------------------------------------------------------------------------------------------------------------------------------------------------------------------------------------------|
| Pdk1 (mmu) ⓘ         | mmu-miR-27a-3p ⓘ |    | 0.565<br><a href="(/DianaTools/index.php?r=microT_CDS/results&amp;keywords=mmu-miR-27a-3p%20ENSMUSG00000006494&amp;genes=ENSMUSG00000006494&amp;mirnas=mmu-miR-27a-3p&amp;threshold=0)">(/DianaTools/index.php?<br/>r=microT_CDS/results&amp;keywords=mmu-<br/>miR-27a-<br/>3p%20ENSMUSG00000006494&amp;genes=ENSMUSG00000006494&amp;mirnas=mmu-<br/>miR-27a-<br/>3p&amp;threshold=0)</a> |
| 061009B22Rik (mmu) ⓘ | mmu-miR-27a-3p ⓘ |    | 0.563<br><a href="(/DianaTools/index.php?r=microT_CDS/results&amp;keywords=mmu-miR-27a-3p%20ENSMUSG00000007777&amp;genes=ENSMUSG00000007777&amp;mirnas=mmu-miR-27a-3p&amp;threshold=0)">(/DianaTools/index.php?<br/>r=microT_CDS/results&amp;keywords=mmu-<br/>miR-27a-<br/>3p%20ENSMUSG00000007777&amp;genes=ENSMUSG00000007777&amp;mirnas=mmu-<br/>miR-27a-<br/>3p&amp;threshold=0)</a> |
| Hnrnpa2b1 (mmu) ⓘ    | mmu-miR-27a-3p ⓘ |    | 0.560<br><a href="(/DianaTools/index.php?r=microT_CDS/results&amp;keywords=mmu-miR-27a-3p%20ENSMUSG00000004980&amp;genes=ENSMUSG00000004980&amp;mirnas=mmu-miR-27a-3p&amp;threshold=0)">(/DianaTools/index.php?<br/>r=microT_CDS/results&amp;keywords=mmu-<br/>miR-27a-<br/>3p%20ENSMUSG00000004980&amp;genes=ENSMUSG00000004980&amp;mirnas=mmu-<br/>miR-27a-<br/>3p&amp;threshold=0)</a> |
| Metap1 (mmu) ⓘ       | mmu-miR-27a-3p ⓘ |    | 0.553<br><a href="(/DianaTools/index.php?r=microT_CDS/results&amp;keywords=mmu-miR-27a-3p%20ENSMUSG00000005813&amp;genes=ENSMUSG00000005813&amp;mirnas=mmu-miR-27a-3p&amp;threshold=0)">(/DianaTools/index.php?<br/>r=microT_CDS/results&amp;keywords=mmu-<br/>miR-27a-<br/>3p%20ENSMUSG00000005813&amp;genes=ENSMUSG00000005813&amp;mirnas=mmu-<br/>miR-27a-<br/>3p&amp;threshold=0)</a> |
| Sod2 (mmu) ⓘ         | mmu-miR-27a-3p ⓘ |    | 0.547<br><a href="(/DianaTools/index.php?r=microT_CDS/results&amp;keywords=mmu-miR-27a-3p%20ENSMUSG00000006818&amp;genes=ENSMUSG00000006818&amp;mirnas=mmu-miR-27a-3p&amp;threshold=0)">(/DianaTools/index.php?<br/>r=microT_CDS/results&amp;keywords=mmu-<br/>miR-27a-<br/>3p%20ENSMUSG00000006818&amp;genes=ENSMUSG00000006818&amp;mirnas=mmu-<br/>miR-27a-<br/>3p&amp;threshold=0)</a> |
| Ctnnb1 (mmu) ⓘ       | mmu-miR-27a-3p ⓘ |    | 0.539<br><a href="(/DianaTools/index.php?r=microT_CDS/results&amp;keywords=mmu-miR-27a-3p%20ENSMUSG00000006932&amp;genes=ENSMUSG00000006932&amp;mirnas=mmu-miR-27a-3p&amp;threshold=0)">(/DianaTools/index.php?<br/>r=microT_CDS/results&amp;keywords=mmu-<br/>miR-27a-<br/>3p%20ENSMUSG00000006932&amp;genes=ENSMUSG00000006932&amp;mirnas=mmu-<br/>miR-27a-<br/>3p&amp;threshold=0)</a> |
| Tmed4 (mmu) ⓘ        | mmu-miR-27a-3p ⓘ |   | 0.519<br><a href="(/DianaTools/index.php?r=microT_CDS/results&amp;keywords=mmu-miR-27a-3p%20ENSMUSG00000004394&amp;genes=ENSMUSG00000004394&amp;mirnas=mmu-miR-27a-3p&amp;threshold=0)">(/DianaTools/index.php?<br/>r=microT_CDS/results&amp;keywords=mmu-<br/>miR-27a-<br/>3p%20ENSMUSG00000004394&amp;genes=ENSMUSG00000004394&amp;mirnas=mmu-<br/>miR-27a-<br/>3p&amp;threshold=0)</a> |
| AI597479 (mmu) ⓘ     | mmu-miR-27a-3p ⓘ |  | 0.515<br><a href="(/DianaTools/index.php?r=microT_CDS/results&amp;keywords=mmu-miR-27a-3p%20ENSMUSG00000010290&amp;genes=ENSMUSG00000010290&amp;mirnas=mmu-miR-27a-3p&amp;threshold=0)">(/DianaTools/index.php?<br/>r=microT_CDS/results&amp;keywords=mmu-<br/>miR-27a-<br/>3p%20ENSMUSG00000010290&amp;genes=ENSMUSG00000010290&amp;mirnas=mmu-<br/>miR-27a-<br/>3p&amp;threshold=0)</a> |
| Polr2a (mmu) ⓘ       | mmu-miR-27a-3p ⓘ |  | 0.514<br><a href="(/DianaTools/index.php?r=microT_CDS/results&amp;keywords=mmu-miR-27a-3p%20ENSMUSG00000005198&amp;genes=ENSMUSG00000005198&amp;mirnas=mmu-miR-27a-3p&amp;threshold=0)">(/DianaTools/index.php?<br/>r=microT_CDS/results&amp;keywords=mmu-<br/>miR-27a-<br/>3p%20ENSMUSG00000005198&amp;genes=ENSMUSG00000005198&amp;mirnas=mmu-<br/>miR-27a-<br/>3p&amp;threshold=0)</a> |
| Crbn (mmu) ⓘ         | mmu-miR-27a-3p ⓘ |  | 0.508<br><a href="(/DianaTools/index.php?r=microT_CDS/results&amp;keywords=mmu-miR-27a-3p%20ENSMUSG00000005362&amp;genes=ENSMUSG00000005362&amp;mirnas=mmu-miR-27a-3p&amp;threshold=0)">(/DianaTools/index.php?<br/>r=microT_CDS/results&amp;keywords=mmu-<br/>miR-27a-<br/>3p%20ENSMUSG00000005362&amp;genes=ENSMUSG00000005362&amp;mirnas=mmu-<br/>miR-27a-<br/>3p&amp;threshold=0)</a> |
| Hipk1 (mmu) ⓘ        | mmu-miR-27a-3p ⓘ |  | 0.491<br><a href="(/DianaTools/index.php?r=microT_CDS/results&amp;keywords=mmu-miR-27a-3p%20ENSMUSG00000008730&amp;genes=ENSMUSG00000008730&amp;mirnas=mmu-miR-27a-3p&amp;threshold=0)">(/DianaTools/index.php?<br/>r=microT_CDS/results&amp;keywords=mmu-<br/>miR-27a-<br/>3p%20ENSMUSG00000008730&amp;genes=ENSMUSG00000008730&amp;mirnas=mmu-<br/>miR-27a-<br/>3p&amp;threshold=0)</a> |

We have placed cookies on your device to help make this website and the services we offer better. By using this site, you agree to the use of cookies. [Learn more](#) ([\(/DianaTools/index.php?r=site/terms\)]((/DianaTools/index.php?r=site/terms)))

I accept

|                 |                  |                                                                                      |                                                                                                                                                                                                                                                                                                                                                                  |
|-----------------|------------------|--------------------------------------------------------------------------------------|------------------------------------------------------------------------------------------------------------------------------------------------------------------------------------------------------------------------------------------------------------------------------------------------------------------------------------------------------------------|
| Ap2s1 (mmu) ⓘ   | mmu-miR-27a-3p ⓘ |    | 0.483<br><a href="(/DianaTools/index.php?r=microT_CDS/results&amp;keywords=mmu-miR-27a-3p%20ENSMUSG00000008036&amp;genes=ENSMUSG00000008036&amp;mirnas=mmu-miR-27a-3p&amp;threshold=0)">(/DianaTools/index.php?r=microT_CDS/results&amp;keywords=mmu-miR-27a-3p%20ENSMUSG00000008036&amp;genes=ENSMUSG00000008036&amp;mirnas=mmu-miR-27a-3p&amp;threshold=0)</a> |
| Syt5 (mmu) ⓘ    | mmu-miR-27a-3p ⓘ |    | 0.480<br><a href="(/DianaTools/index.php?r=microT_CDS/results&amp;keywords=mmu-miR-27a-3p%20ENSMUSG00000004961&amp;genes=ENSMUSG00000004961&amp;mirnas=mmu-miR-27a-3p&amp;threshold=0)">(/DianaTools/index.php?r=microT_CDS/results&amp;keywords=mmu-miR-27a-3p%20ENSMUSG00000004961&amp;genes=ENSMUSG00000004961&amp;mirnas=mmu-miR-27a-3p&amp;threshold=0)</a> |
| Plekha8 (mmu) ⓘ | mmu-miR-27a-3p ⓘ |    | 0.473<br><a href="(/DianaTools/index.php?r=microT_CDS/results&amp;keywords=mmu-miR-27a-3p%20ENSMUSG00000005225&amp;genes=ENSMUSG00000005225&amp;mirnas=mmu-miR-27a-3p&amp;threshold=0)">(/DianaTools/index.php?r=microT_CDS/results&amp;keywords=mmu-miR-27a-3p%20ENSMUSG00000005225&amp;genes=ENSMUSG00000005225&amp;mirnas=mmu-miR-27a-3p&amp;threshold=0)</a> |
| Plekha8 (mmu) ⓘ | mmu-miR-27a-3p ⓘ |    | 0.473<br><a href="(/DianaTools/index.php?r=microT_CDS/results&amp;keywords=mmu-miR-27a-3p%20ENSMUSG00000005225&amp;genes=ENSMUSG00000005225&amp;mirnas=mmu-miR-27a-3p&amp;threshold=0)">(/DianaTools/index.php?r=microT_CDS/results&amp;keywords=mmu-miR-27a-3p%20ENSMUSG00000005225&amp;genes=ENSMUSG00000005225&amp;mirnas=mmu-miR-27a-3p&amp;threshold=0)</a> |
| Nob1 (mmu) ⓘ    | mmu-miR-27a-3p ⓘ |    | 0.457<br><a href="(/DianaTools/index.php?r=microT_CDS/results&amp;keywords=mmu-miR-27a-3p%20ENSMUSG00000003848&amp;genes=ENSMUSG00000003848&amp;mirnas=mmu-miR-27a-3p&amp;threshold=0)">(/DianaTools/index.php?r=microT_CDS/results&amp;keywords=mmu-miR-27a-3p%20ENSMUSG00000003848&amp;genes=ENSMUSG00000003848&amp;mirnas=mmu-miR-27a-3p&amp;threshold=0)</a> |
| Gabrb2 (mmu) ⓘ  | mmu-miR-27a-3p ⓘ |    | 0.451<br><a href="(/DianaTools/index.php?r=microT_CDS/results&amp;keywords=mmu-miR-27a-3p%20ENSMUSG00000007653&amp;genes=ENSMUSG00000007653&amp;mirnas=mmu-miR-27a-3p&amp;threshold=0)">(/DianaTools/index.php?r=microT_CDS/results&amp;keywords=mmu-miR-27a-3p%20ENSMUSG00000007653&amp;genes=ENSMUSG00000007653&amp;mirnas=mmu-miR-27a-3p&amp;threshold=0)</a> |
| Dnajb1 (mmu) ⓘ  | mmu-miR-27a-3p ⓘ |   | 0.451<br><a href="(/DianaTools/index.php?r=microT_CDS/results&amp;keywords=mmu-miR-27a-3p%20ENSMUSG00000005483&amp;genes=ENSMUSG00000005483&amp;mirnas=mmu-miR-27a-3p&amp;threshold=0)">(/DianaTools/index.php?r=microT_CDS/results&amp;keywords=mmu-miR-27a-3p%20ENSMUSG00000005483&amp;genes=ENSMUSG00000005483&amp;mirnas=mmu-miR-27a-3p&amp;threshold=0)</a> |
| Nid1 (mmu) ⓘ    | mmu-miR-27a-3p ⓘ |  | 0.450<br><a href="(/DianaTools/index.php?r=microT_CDS/results&amp;keywords=mmu-miR-27a-3p%20ENSMUSG00000005397&amp;genes=ENSMUSG00000005397&amp;mirnas=mmu-miR-27a-3p&amp;threshold=0)">(/DianaTools/index.php?r=microT_CDS/results&amp;keywords=mmu-miR-27a-3p%20ENSMUSG00000005397&amp;genes=ENSMUSG00000005397&amp;mirnas=mmu-miR-27a-3p&amp;threshold=0)</a> |
| Ddx39 (mmu) ⓘ   | mmu-miR-27a-3p ⓘ |  | -                                                                                                                                                                                                                                                                                                                                                                |
| Pou2f2 (mmu) ⓘ  | mmu-miR-27a-3p ⓘ |  | -                                                                                                                                                                                                                                                                                                                                                                |
| Bcl2l1 (mmu) ⓘ  | mmu-miR-27a-3p ⓘ |  | -                                                                                                                                                                                                                                                                                                                                                                |
| Nfat5 (mmu) ⓘ   | mmu-miR-27a-3p ⓘ |  | -                                                                                                                                                                                                                                                                                                                                                                |
| Tmbim1 (mmu) ⓘ  | mmu-miR-27a-3p ⓘ |  | -                                                                                                                                                                                                                                                                                                                                                                |
| Cp (mmu) ⓘ      | mmu-miR-27a-3p ⓘ |  | -                                                                                                                                                                                                                                                                                                                                                                |
| Cd163 (mmu) ⓘ   | mmu-miR-27a-3p ⓘ |  | -                                                                                                                                                                                                                                                                                                                                                                |
| Myo9b (mmu) ⓘ   | mmu-miR-27a-3p ⓘ |  | -                                                                                                                                                                                                                                                                                                                                                                |
| Prg4 (mmu) ⓘ    | mmu-miR-27a-3p ⓘ |  | -                                                                                                                                                                                                                                                                                                                                                                |

We have placed cookies on your device to help make this website and the services we offer better. By using this site, you agree to the use of cookies. [Learn more]((/DianaTools/index.php?r=site/terms)) ([/DianaTools/index.php?r=site/terms]((/DianaTools/index.php?r=site/terms))).

I accept

|                 |                  |    |   |
|-----------------|------------------|----|---|
| Tek (mmu) ⓘ     | mmu-miR-27a-3p ⓘ | IP | - |
| Ubp1 (mmu) ⓘ    | mmu-miR-27a-3p ⓘ | IP | - |
| Cdkal1 (mmu) ⓘ  | mmu-miR-27a-3p ⓘ | IP | - |
| Celf1 (mmu) ⓘ   | mmu-miR-27a-3p ⓘ | IP | - |
| Homer1 (mmu) ⓘ  | mmu-miR-27a-3p ⓘ | IP | - |
| Slc1a2 (mmu) ⓘ  | mmu-miR-27a-3p ⓘ | IP | - |
| Cbfa2t3 (mmu) ⓘ | mmu-miR-27a-3p ⓘ | IP | - |
| Ppp2r1a (mmu) ⓘ | mmu-miR-27a-3p ⓘ | IP | - |
| Bcr (mmu) ⓘ     | mmu-miR-27a-3p ⓘ | IP | - |
| Srm (mmu) ⓘ     | mmu-miR-27a-3p ⓘ | IP | - |
| Txn2 (mmu) ⓘ    | mmu-miR-27a-3p ⓘ | IP | - |
| Dnaja3 (mmu) ⓘ  | mmu-miR-27a-3p ⓘ | IP | - |
| Fbxo11 (mmu) ⓘ  | mmu-miR-27a-3p ⓘ | IP | - |
| Clc3 (mmu) ⓘ    | mmu-miR-27a-3p ⓘ | IP | - |
| Kif20a (mmu) ⓘ  | mmu-miR-27a-3p ⓘ | IP | - |
| Sec14l2 (mmu) ⓘ | mmu-miR-27a-3p ⓘ | IP | - |
| Sec14l2 (mmu) ⓘ | mmu-miR-27a-3p ⓘ | IP | - |
| Nsmf (mmu) ⓘ    | mmu-miR-27a-3p ⓘ | IP | - |
| Cbx5 (mmu) ⓘ    | mmu-miR-27a-3p ⓘ | IP | - |
| Grm3 (mmu) ⓘ    | mmu-miR-27a-3p ⓘ | IP | - |
| Rbfox1 (mmu) ⓘ  | mmu-miR-27a-3p ⓘ | IP | - |
| Hipk1 (mmu) ⓘ   | mmu-miR-27a-3p ⓘ | IP | - |
| Cacna1e (mmu) ⓘ | mmu-miR-27a-3p ⓘ | IP | - |
| Cs (mmu) ⓘ      | mmu-miR-27a-3p ⓘ | IP | - |
| Ptpn6 (mmu) ⓘ   | mmu-miR-27a-3p ⓘ | IP | - |
| Ptrf (mmu) ⓘ    | mmu-miR-27a-3p ⓘ | IP | - |
| Ctnnb1 (mmu) ⓘ  | mmu-miR-27a-3p ⓘ | IP | - |
| Stxbp2 (mmu) ⓘ  | mmu-miR-27a-3p ⓘ | IP | - |
| Pcdha10 (mmu) ⓘ | mmu-miR-27a-3p ⓘ | IP | - |
| Zfp655 (mmu) ⓘ  | mmu-miR-27a-3p ⓘ | IP | - |
| Tpr (mmu) ⓘ     | mmu-miR-27a-3p ⓘ | IP | - |
| Calr (mmu) ⓘ    | mmu-miR-27a-3p ⓘ | IP | - |

We have placed cookies on your device to help make this website and the services we offer better. By using this site, you agree to the use of cookies. [Learn more \(/DianaTools/index.php?r=site/terms\)](/DianaTools/index.php?r=site/terms).

I accept

|                 |                  |    |                                                                                                                                                                                              |
|-----------------|------------------|----|----------------------------------------------------------------------------------------------------------------------------------------------------------------------------------------------|
| Syn2 (mmu) ⓘ    | mmu-miR-27a-3p ⓘ | IP | -                                                                                                                                                                                            |
| Cnp (mmu) ⓘ     | mmu-miR-27a-3p ⓘ | IP | -                                                                                                                                                                                            |
| Wsb1 (mmu) ⓘ    | mmu-miR-27a-3p ⓘ | IP | 1.000<br><a href="#">(/DianaTools/index.php?r=miroT_CDS/results&amp;keywords=mmu-miR-27a-3p%20ENSMUSG00000017677&amp;genes=ENSMUSG00000017677&amp;mirnas=mmu-miR-27a-3p&amp;threshold=0)</a> |
| Appbp2 (mmu) ⓘ  | mmu-miR-27a-3p ⓘ | IP | 1.000<br><a href="#">(/DianaTools/index.php?r=miroT_CDS/results&amp;keywords=mmu-miR-27a-3p%20ENSMUSG00000018481&amp;genes=ENSMUSG00000018481&amp;mirnas=mmu-miR-27a-3p&amp;threshold=0)</a> |
| Appbp2 (mmu) ⓘ  | mmu-miR-27a-3p ⓘ | IP | 1.000<br><a href="#">(/DianaTools/index.php?r=miroT_CDS/results&amp;keywords=mmu-miR-27a-3p%20ENSMUSG00000018481&amp;genes=ENSMUSG00000018481&amp;mirnas=mmu-miR-27a-3p&amp;threshold=0)</a> |
| Adora2b (mmu) ⓘ | mmu-miR-27a-3p ⓘ | IP | 1.000<br><a href="#">(/DianaTools/index.php?r=miroT_CDS/results&amp;keywords=mmu-miR-27a-3p%20ENSMUSG00000018500&amp;genes=ENSMUSG00000018500&amp;mirnas=mmu-miR-27a-3p&amp;threshold=0)</a> |
| Adora2b (mmu) ⓘ | mmu-miR-27a-3p ⓘ | IP | 1.000<br><a href="#">(/DianaTools/index.php?r=miroT_CDS/results&amp;keywords=mmu-miR-27a-3p%20ENSMUSG00000018500&amp;genes=ENSMUSG00000018500&amp;mirnas=mmu-miR-27a-3p&amp;threshold=0)</a> |
| Ikzf1 (mmu) ⓘ   | mmu-miR-27a-3p ⓘ | IP | 0.999<br><a href="#">(/DianaTools/index.php?r=miroT_CDS/results&amp;keywords=mmu-miR-27a-3p%20ENSMUSG00000018654&amp;genes=ENSMUSG00000018654&amp;mirnas=mmu-miR-27a-3p&amp;threshold=0)</a> |
| Ksr1 (mmu) ⓘ    | mmu-miR-27a-3p ⓘ | IP | 0.999<br><a href="#">(/DianaTools/index.php?r=miroT_CDS/results&amp;keywords=mmu-miR-27a-3p%20ENSMUSG00000018334&amp;genes=ENSMUSG00000018334&amp;mirnas=mmu-miR-27a-3p&amp;threshold=0)</a> |
| Abca1 (mmu) ⓘ   | mmu-miR-27a-3p ⓘ | IP | 0.998<br><a href="#">(/DianaTools/index.php?r=miroT_CDS/results&amp;keywords=mmu-miR-27a-3p%20ENSMUSG00000015243&amp;genes=ENSMUSG00000015243&amp;mirnas=mmu-miR-27a-3p&amp;threshold=0)</a> |
| Abca1 (mmu) ⓘ   | mmu-miR-27a-3p ⓘ | IP | 0.998<br><a href="#">(/DianaTools/index.php?r=miroT_CDS/results&amp;keywords=mmu-miR-27a-3p%20ENSMUSG00000015243&amp;genes=ENSMUSG00000015243&amp;mirnas=mmu-miR-27a-3p&amp;threshold=0)</a> |
| Atxn10 (mmu) ⓘ  | mmu-miR-27a-3p ⓘ | IP | 0.961<br><a href="#">(/DianaTools/index.php?r=miroT_CDS/results&amp;keywords=mmu-miR-27a-3p%20ENSMUSG00000016541&amp;genes=ENSMUSG00000016541&amp;mirnas=mmu-miR-27a-3p&amp;threshold=0)</a> |

We have placed cookies on your device to help make this website and the services we offer better. By using this site, you agree to the use of cookies. [Learn more](#) ([/DianaTools/index.php?r=site/terms](#)).

I accept

|                 |                  |                                                                                      |                                                                                                                                                                                                                                                                                                                                                                                           |
|-----------------|------------------|--------------------------------------------------------------------------------------|-------------------------------------------------------------------------------------------------------------------------------------------------------------------------------------------------------------------------------------------------------------------------------------------------------------------------------------------------------------------------------------------|
| Calm3 (mmu) ⓘ   | mmu-miR-27a-3p ⓘ |    | 0.857<br><a href="(/DianaTools/index.php?r=microT_CDS/results&amp;keywords=mmu-miR-27a-3p%20ENSMUSG00000019370&amp;genes=ENSMUSG00000019370&amp;mirnas=mmu-miR-27a-3p&amp;threshold=0)">(/DianaTools/index.php?<br/>r=microT_CDS/results&amp;keywords=mmu-<br/>miR-27a-<br/>3p%20ENSMUSG00000019370&amp;genes=ENSMUSG00000019370&amp;mirnas=mmu-<br/>miR-27a-<br/>3p&amp;threshold=0)</a> |
| Calm3 (mmu) ⓘ   | mmu-miR-27a-3p ⓘ |    | 0.857<br><a href="(/DianaTools/index.php?r=microT_CDS/results&amp;keywords=mmu-miR-27a-3p%20ENSMUSG00000019370&amp;genes=ENSMUSG00000019370&amp;mirnas=mmu-miR-27a-3p&amp;threshold=0)">(/DianaTools/index.php?<br/>r=microT_CDS/results&amp;keywords=mmu-<br/>miR-27a-<br/>3p%20ENSMUSG00000019370&amp;genes=ENSMUSG00000019370&amp;mirnas=mmu-<br/>miR-27a-<br/>3p&amp;threshold=0)</a> |
| Ccnt1 (mmu) ⓘ   | mmu-miR-27a-3p ⓘ |    | 0.850<br><a href="(/DianaTools/index.php?r=microT_CDS/results&amp;keywords=mmu-miR-27a-3p%20ENSMUSG00000011960&amp;genes=ENSMUSG00000011960&amp;mirnas=mmu-miR-27a-3p&amp;threshold=0)">(/DianaTools/index.php?<br/>r=microT_CDS/results&amp;keywords=mmu-<br/>miR-27a-<br/>3p%20ENSMUSG00000011960&amp;genes=ENSMUSG00000011960&amp;mirnas=mmu-<br/>miR-27a-<br/>3p&amp;threshold=0)</a> |
| Fam120b (mmu) ⓘ | mmu-miR-27a-3p ⓘ |    | 0.834<br><a href="(/DianaTools/index.php?r=microT_CDS/results&amp;keywords=mmu-miR-27a-3p%20ENSMUSG00000014763&amp;genes=ENSMUSG00000014763&amp;mirnas=mmu-miR-27a-3p&amp;threshold=0)">(/DianaTools/index.php?<br/>r=microT_CDS/results&amp;keywords=mmu-<br/>miR-27a-<br/>3p%20ENSMUSG00000014763&amp;genes=ENSMUSG00000014763&amp;mirnas=mmu-<br/>miR-27a-<br/>3p&amp;threshold=0)</a> |
| Ypel2 (mmu) ⓘ   | mmu-miR-27a-3p ⓘ |    | 0.832<br><a href="(/DianaTools/index.php?r=microT_CDS/results&amp;keywords=mmu-miR-27a-3p%20ENSMUSG00000018427&amp;genes=ENSMUSG00000018427&amp;mirnas=mmu-miR-27a-3p&amp;threshold=0)">(/DianaTools/index.php?<br/>r=microT_CDS/results&amp;keywords=mmu-<br/>miR-27a-<br/>3p%20ENSMUSG00000018427&amp;genes=ENSMUSG00000018427&amp;mirnas=mmu-<br/>miR-27a-<br/>3p&amp;threshold=0)</a> |
| Nup50 (mmu) ⓘ   | mmu-miR-27a-3p ⓘ |    | 0.816<br><a href="(/DianaTools/index.php?r=microT_CDS/results&amp;keywords=mmu-miR-27a-3p%20ENSMUSG00000016619&amp;genes=ENSMUSG00000016619&amp;mirnas=mmu-miR-27a-3p&amp;threshold=0)">(/DianaTools/index.php?<br/>r=microT_CDS/results&amp;keywords=mmu-<br/>miR-27a-<br/>3p%20ENSMUSG00000016619&amp;genes=ENSMUSG00000016619&amp;mirnas=mmu-<br/>miR-27a-<br/>3p&amp;threshold=0)</a> |
| Mtmr4 (mmu) ⓘ   | mmu-miR-27a-3p ⓘ |    | 0.785<br><a href="(/DianaTools/index.php?r=microT_CDS/results&amp;keywords=mmu-miR-27a-3p%20ENSMUSG00000018401&amp;genes=ENSMUSG00000018401&amp;mirnas=mmu-miR-27a-3p&amp;threshold=0)">(/DianaTools/index.php?<br/>r=microT_CDS/results&amp;keywords=mmu-<br/>miR-27a-<br/>3p%20ENSMUSG00000018401&amp;genes=ENSMUSG00000018401&amp;mirnas=mmu-<br/>miR-27a-<br/>3p&amp;threshold=0)</a> |
| Gata3 (mmu) ⓘ   | mmu-miR-27a-3p ⓘ |  | 0.782<br><a href="(/DianaTools/index.php?r=microT_CDS/results&amp;keywords=mmu-miR-27a-3p%20ENSMUSG00000015619&amp;genes=ENSMUSG00000015619&amp;mirnas=mmu-miR-27a-3p&amp;threshold=0)">(/DianaTools/index.php?<br/>r=microT_CDS/results&amp;keywords=mmu-<br/>miR-27a-<br/>3p%20ENSMUSG00000015619&amp;genes=ENSMUSG00000015619&amp;mirnas=mmu-<br/>miR-27a-<br/>3p&amp;threshold=0)</a> |
| Nfe2l2 (mmu) ⓘ  | mmu-miR-27a-3p ⓘ |  | 0.769<br><a href="(/DianaTools/index.php?r=microT_CDS/results&amp;keywords=mmu-miR-27a-3p%20ENSMUSG00000015839&amp;genes=ENSMUSG00000015839&amp;mirnas=mmu-miR-27a-3p&amp;threshold=0)">(/DianaTools/index.php?<br/>r=microT_CDS/results&amp;keywords=mmu-<br/>miR-27a-<br/>3p%20ENSMUSG00000015839&amp;genes=ENSMUSG00000015839&amp;mirnas=mmu-<br/>miR-27a-<br/>3p&amp;threshold=0)</a> |
| Nfe2l2 (mmu) ⓘ  | mmu-miR-27a-3p ⓘ |  | 0.769<br><a href="(/DianaTools/index.php?r=microT_CDS/results&amp;keywords=mmu-miR-27a-3p%20ENSMUSG00000015839&amp;genes=ENSMUSG00000015839&amp;mirnas=mmu-miR-27a-3p&amp;threshold=0)">(/DianaTools/index.php?<br/>r=microT_CDS/results&amp;keywords=mmu-<br/>miR-27a-<br/>3p%20ENSMUSG00000015839&amp;genes=ENSMUSG00000015839&amp;mirnas=mmu-<br/>miR-27a-<br/>3p&amp;threshold=0)</a> |
| Serinc3 (mmu) ⓘ | mmu-miR-27a-3p ⓘ |  | 0.747<br><a href="(/DianaTools/index.php?r=microT_CDS/results&amp;keywords=mmu-miR-27a-3p%20ENSMUSG00000017707&amp;genes=ENSMUSG00000017707&amp;mirnas=mmu-miR-27a-3p&amp;threshold=0)">(/DianaTools/index.php?<br/>r=microT_CDS/results&amp;keywords=mmu-<br/>miR-27a-<br/>3p%20ENSMUSG00000017707&amp;genes=ENSMUSG00000017707&amp;mirnas=mmu-<br/>miR-27a-<br/>3p&amp;threshold=0)</a> |

We have placed cookies on your device to help make this website and the services we offer better. By using this site, you agree to the use of cookies. [Learn more](#) ([\(/DianaTools/index.php?r=site/terms\)]((/DianaTools/index.php?r=site/terms)))

I accept

|                 |                  |                                                                                      |                                                                                                                                                                                                                                                                                                                                                                |
|-----------------|------------------|--------------------------------------------------------------------------------------|----------------------------------------------------------------------------------------------------------------------------------------------------------------------------------------------------------------------------------------------------------------------------------------------------------------------------------------------------------------|
| Serinc3 (mmu) ⓘ | mmu-miR-27a-3p ⓘ |    | 0.747<br><a href="/DianaTools/index.php?r=microT_CDS/results&amp;keywords=mmu-miR-27a-3p%20ENSMUSG00000017707&amp;genes=ENSMUSG00000017707&amp;mirnas=mmu-miR-27a-3p&amp;threshold=0">(/DianaTools/index.php?r=microT_CDS/results&amp;keywords=mmu-miR-27a-3p%20ENSMUSG00000017707&amp;genes=ENSMUSG00000017707&amp;mirnas=mmu-miR-27a-3p&amp;threshold=0)</a> |
| Rbm25 (mmu) ⓘ   | mmu-miR-27a-3p ⓘ |    | 0.743<br><a href="/DianaTools/index.php?r=microT_CDS/results&amp;keywords=mmu-miR-27a-3p%20ENSMUSG00000010608&amp;genes=ENSMUSG00000010608&amp;mirnas=mmu-miR-27a-3p&amp;threshold=0">(/DianaTools/index.php?r=microT_CDS/results&amp;keywords=mmu-miR-27a-3p%20ENSMUSG00000010608&amp;genes=ENSMUSG00000010608&amp;mirnas=mmu-miR-27a-3p&amp;threshold=0)</a> |
| Rbm25 (mmu) ⓘ   | mmu-miR-27a-3p ⓘ |    | 0.743<br><a href="/DianaTools/index.php?r=microT_CDS/results&amp;keywords=mmu-miR-27a-3p%20ENSMUSG00000010608&amp;genes=ENSMUSG00000010608&amp;mirnas=mmu-miR-27a-3p&amp;threshold=0">(/DianaTools/index.php?r=microT_CDS/results&amp;keywords=mmu-miR-27a-3p%20ENSMUSG00000010608&amp;genes=ENSMUSG00000010608&amp;mirnas=mmu-miR-27a-3p&amp;threshold=0)</a> |
| Etaa1 (mmu) ⓘ   | mmu-miR-27a-3p ⓘ |    | 0.722<br><a href="/DianaTools/index.php?r=microT_CDS/results&amp;keywords=mmu-miR-27a-3p%20ENSMUSG00000016984&amp;genes=ENSMUSG00000016984&amp;mirnas=mmu-miR-27a-3p&amp;threshold=0">(/DianaTools/index.php?r=microT_CDS/results&amp;keywords=mmu-miR-27a-3p%20ENSMUSG00000016984&amp;genes=ENSMUSG00000016984&amp;mirnas=mmu-miR-27a-3p&amp;threshold=0)</a> |
| Stk4 (mmu) ⓘ    | mmu-miR-27a-3p ⓘ |    | 0.721<br><a href="/DianaTools/index.php?r=microT_CDS/results&amp;keywords=mmu-miR-27a-3p%20ENSMUSG00000018209&amp;genes=ENSMUSG00000018209&amp;mirnas=mmu-miR-27a-3p&amp;threshold=0">(/DianaTools/index.php?r=microT_CDS/results&amp;keywords=mmu-miR-27a-3p%20ENSMUSG00000018209&amp;genes=ENSMUSG00000018209&amp;mirnas=mmu-miR-27a-3p&amp;threshold=0)</a> |
| Trove2 (mmu) ⓘ  | mmu-miR-27a-3p ⓘ |    | 0.718<br><a href="/DianaTools/index.php?r=microT_CDS/results&amp;keywords=mmu-miR-27a-3p%20ENSMUSG00000018199&amp;genes=ENSMUSG00000018199&amp;mirnas=mmu-miR-27a-3p&amp;threshold=0">(/DianaTools/index.php?r=microT_CDS/results&amp;keywords=mmu-miR-27a-3p%20ENSMUSG00000018199&amp;genes=ENSMUSG00000018199&amp;mirnas=mmu-miR-27a-3p&amp;threshold=0)</a> |
| Ccl4 (mmu) ⓘ    | mmu-miR-27a-3p ⓘ |    | 0.712<br><a href="/DianaTools/index.php?r=microT_CDS/results&amp;keywords=mmu-miR-27a-3p%20ENSMUSG00000018930&amp;genes=ENSMUSG00000018930&amp;mirnas=mmu-miR-27a-3p&amp;threshold=0">(/DianaTools/index.php?r=microT_CDS/results&amp;keywords=mmu-miR-27a-3p%20ENSMUSG00000018930&amp;genes=ENSMUSG00000018930&amp;mirnas=mmu-miR-27a-3p&amp;threshold=0)</a> |
| Suz12 (mmu) ⓘ   | mmu-miR-27a-3p ⓘ |  | 0.709<br><a href="/DianaTools/index.php?r=microT_CDS/results&amp;keywords=mmu-miR-27a-3p%20ENSMUSG00000017548&amp;genes=ENSMUSG00000017548&amp;mirnas=mmu-miR-27a-3p&amp;threshold=0">(/DianaTools/index.php?r=microT_CDS/results&amp;keywords=mmu-miR-27a-3p%20ENSMUSG00000017548&amp;genes=ENSMUSG00000017548&amp;mirnas=mmu-miR-27a-3p&amp;threshold=0)</a> |
| Srsf1 (mmu) ⓘ   | mmu-miR-27a-3p ⓘ |  | 0.699<br><a href="/DianaTools/index.php?r=microT_CDS/results&amp;keywords=mmu-miR-27a-3p%20ENSMUSG00000018379&amp;genes=ENSMUSG00000018379&amp;mirnas=mmu-miR-27a-3p&amp;threshold=0">(/DianaTools/index.php?r=microT_CDS/results&amp;keywords=mmu-miR-27a-3p%20ENSMUSG00000018379&amp;genes=ENSMUSG00000018379&amp;mirnas=mmu-miR-27a-3p&amp;threshold=0)</a> |
| Steap4 (mmu) ⓘ  | mmu-miR-27a-3p ⓘ |  | 0.675<br><a href="/DianaTools/index.php?r=microT_CDS/results&amp;keywords=mmu-miR-27a-3p%20ENSMUSG00000012428&amp;genes=ENSMUSG00000012428">(/DianaTools/index.php?r=microT_CDS/results&amp;keywords=mmu-miR-27a-3p%20ENSMUSG00000012428&amp;genes=ENSMUSG00000012428)</a>                                                                                     |
| Cadps2 (mmu) ⓘ  | mmu-miR-27a-3p ⓘ |  | 0.670<br><a href="/DianaTools/index.php?r=microT_CDS/results&amp;keywords=mmu-miR-27a-3p%20ENSMUSG00000017978&amp;genes=ENSMUSG00000017978&amp;mirnas=mmu-miR-27a-3p&amp;threshold=0">(/DianaTools/index.php?r=microT_CDS/results&amp;keywords=mmu-miR-27a-3p%20ENSMUSG00000017978&amp;genes=ENSMUSG00000017978&amp;mirnas=mmu-miR-27a-3p&amp;threshold=0)</a> |

We have placed cookies on your device to help make this website and the services we offer better. By using this site, you agree to the use of cookies. [Learn more](#) (</DianaTools/index.php?r=site/terms>).

I accept



|                 |                  |                                                                                      |                                                                                                                                                                                                                                                                                                                                                                                           |
|-----------------|------------------|--------------------------------------------------------------------------------------|-------------------------------------------------------------------------------------------------------------------------------------------------------------------------------------------------------------------------------------------------------------------------------------------------------------------------------------------------------------------------------------------|
| Pnpo (mmu) ⓘ    | mmu-miR-27a-3p ⓘ |    | 0.650<br><a href="(/DianaTools/index.php?r=microT_CDS/results&amp;keywords=mmu-miR-27a-3p%20ENSMUSG00000018659&amp;genes=ENSMUSG00000018659&amp;mirnas=mmu-miR-27a-3p&amp;threshold=0)">(/DianaTools/index.php?<br/>r=microT_CDS/results&amp;keywords=mmu-<br/>miR-27a-<br/>3p%20ENSMUSG00000018659&amp;genes=ENSMUSG00000018659&amp;mirnas=mmu-<br/>miR-27a-<br/>3p&amp;threshold=0)</a> |
| Pten (mmu) ⓘ    | mmu-miR-27a-3p ⓘ |    | 0.615<br><a href="(/DianaTools/index.php?r=microT_CDS/results&amp;keywords=mmu-miR-27a-3p%20ENSMUSG00000013663&amp;genes=ENSMUSG00000013663&amp;mirnas=mmu-miR-27a-3p&amp;threshold=0)">(/DianaTools/index.php?<br/>r=microT_CDS/results&amp;keywords=mmu-<br/>miR-27a-<br/>3p%20ENSMUSG00000013663&amp;genes=ENSMUSG00000013663&amp;mirnas=mmu-<br/>miR-27a-<br/>3p&amp;threshold=0)</a> |
| Lama5 (mmu) ⓘ   | mmu-miR-27a-3p ⓘ |    | 0.587<br><a href="(/DianaTools/index.php?r=microT_CDS/results&amp;keywords=mmu-miR-27a-3p%20ENSMUSG00000015647&amp;genes=ENSMUSG00000015647&amp;mirnas=mmu-miR-27a-3p&amp;threshold=0)">(/DianaTools/index.php?<br/>r=microT_CDS/results&amp;keywords=mmu-<br/>miR-27a-<br/>3p%20ENSMUSG00000015647&amp;genes=ENSMUSG00000015647&amp;mirnas=mmu-<br/>miR-27a-<br/>3p&amp;threshold=0)</a> |
| Pank3 (mmu) ⓘ   | mmu-miR-27a-3p ⓘ |    | 0.583<br><a href="(/DianaTools/index.php?r=microT_CDS/results&amp;keywords=mmu-miR-27a-3p%20ENSMUSG00000018846&amp;genes=ENSMUSG00000018846&amp;mirnas=mmu-miR-27a-3p&amp;threshold=0)">(/DianaTools/index.php?<br/>r=microT_CDS/results&amp;keywords=mmu-<br/>miR-27a-<br/>3p%20ENSMUSG00000018846&amp;genes=ENSMUSG00000018846&amp;mirnas=mmu-<br/>miR-27a-<br/>3p&amp;threshold=0)</a> |
| Pank3 (mmu) ⓘ   | mmu-miR-27a-3p ⓘ |    | 0.583<br><a href="(/DianaTools/index.php?r=microT_CDS/results&amp;keywords=mmu-miR-27a-3p%20ENSMUSG00000018846&amp;genes=ENSMUSG00000018846&amp;mirnas=mmu-miR-27a-3p&amp;threshold=0)">(/DianaTools/index.php?<br/>r=microT_CDS/results&amp;keywords=mmu-<br/>miR-27a-<br/>3p%20ENSMUSG00000018846&amp;genes=ENSMUSG00000018846&amp;mirnas=mmu-<br/>miR-27a-<br/>3p&amp;threshold=0)</a> |
| Lamp2 (mmu) ⓘ   | mmu-miR-27a-3p ⓘ |    | 0.579<br><a href="(/DianaTools/index.php?r=microT_CDS/results&amp;keywords=mmu-miR-27a-3p%20ENSMUSG00000016534&amp;genes=ENSMUSG00000016534&amp;mirnas=mmu-miR-27a-3p&amp;threshold=0)">(/DianaTools/index.php?<br/>r=microT_CDS/results&amp;keywords=mmu-<br/>miR-27a-<br/>3p%20ENSMUSG00000016534&amp;genes=ENSMUSG00000016534&amp;mirnas=mmu-<br/>miR-27a-<br/>3p&amp;threshold=0)</a> |
| E2f3 (mmu) ⓘ    | mmu-miR-27a-3p ⓘ |    | 0.573<br><a href="(/DianaTools/index.php?r=microT_CDS/results&amp;keywords=mmu-miR-27a-3p%20ENSMUSG00000016477&amp;genes=ENSMUSG00000016477&amp;mirnas=mmu-miR-27a-3p&amp;threshold=0)">(/DianaTools/index.php?<br/>r=microT_CDS/results&amp;keywords=mmu-<br/>miR-27a-<br/>3p%20ENSMUSG00000016477&amp;genes=ENSMUSG00000016477&amp;mirnas=mmu-<br/>miR-27a-<br/>3p&amp;threshold=0)</a> |
| E2f3 (mmu) ⓘ    | mmu-miR-27a-3p ⓘ |  | 0.573<br><a href="(/DianaTools/index.php?r=microT_CDS/results&amp;keywords=mmu-miR-27a-3p%20ENSMUSG00000016477&amp;genes=ENSMUSG00000016477&amp;mirnas=mmu-miR-27a-3p&amp;threshold=0)">(/DianaTools/index.php?<br/>r=microT_CDS/results&amp;keywords=mmu-<br/>miR-27a-<br/>3p%20ENSMUSG00000016477&amp;genes=ENSMUSG00000016477&amp;mirnas=mmu-<br/>miR-27a-<br/>3p&amp;threshold=0)</a> |
| Pmp22 (mmu) ⓘ   | mmu-miR-27a-3p ⓘ |  | 0.569<br><a href="(/DianaTools/index.php?r=microT_CDS/results&amp;keywords=mmu-miR-27a-3p%20ENSMUSG00000018217&amp;genes=ENSMUSG00000018217&amp;mirnas=mmu-miR-27a-3p&amp;threshold=0)">(/DianaTools/index.php?<br/>r=microT_CDS/results&amp;keywords=mmu-<br/>miR-27a-<br/>3p%20ENSMUSG00000018217&amp;genes=ENSMUSG00000018217&amp;mirnas=mmu-<br/>miR-27a-<br/>3p&amp;threshold=0)</a> |
| Pip4k2b (mmu) ⓘ | mmu-miR-27a-3p ⓘ |  | 0.567<br><a href="(/DianaTools/index.php?r=microT_CDS/results&amp;keywords=mmu-miR-27a-3p%20ENSMUSG00000018547&amp;genes=ENSMUSG00000018547&amp;mirnas=mmu-miR-27a-3p&amp;threshold=0)">(/DianaTools/index.php?<br/>r=microT_CDS/results&amp;keywords=mmu-<br/>miR-27a-<br/>3p%20ENSMUSG00000018547&amp;genes=ENSMUSG00000018547&amp;mirnas=mmu-<br/>miR-27a-<br/>3p&amp;threshold=0)</a> |
| Pip4k2b (mmu) ⓘ | mmu-miR-27a-3p ⓘ |  | 0.567<br><a href="(/DianaTools/index.php?r=microT_CDS/results&amp;keywords=mmu-miR-27a-3p%20ENSMUSG00000018547&amp;genes=ENSMUSG00000018547&amp;mirnas=mmu-miR-27a-3p&amp;threshold=0)">(/DianaTools/index.php?<br/>r=microT_CDS/results&amp;keywords=mmu-<br/>miR-27a-<br/>3p%20ENSMUSG00000018547&amp;genes=ENSMUSG00000018547&amp;mirnas=mmu-<br/>miR-27a-<br/>3p&amp;threshold=0)</a> |

We have placed cookies on your device to help make this website and the services we offer better. By using this site, you agree to the use of cookies. [Learn more](#) ([\(/DianaTools/index.php?r=site/terms\)]((/DianaTools/index.php?r=site/terms))).

I accept

|                   |                  |                                                                                      |                                                                                                                                                                                                                                                                                                                                                                                         |
|-------------------|------------------|--------------------------------------------------------------------------------------|-----------------------------------------------------------------------------------------------------------------------------------------------------------------------------------------------------------------------------------------------------------------------------------------------------------------------------------------------------------------------------------------|
| Yes1 (mmu) ⓘ      | mmu-miR-27a-3p ⓘ |    | 0.565<br><a href="(/DianaTools/index.php?r=miroT_CDS/results&amp;keywords=mmu-miR-27a-3p%20ENSMUSG00000014932&amp;genes=ENSMUSG00000014932&amp;mirnas=mmu-miR-27a-3p&amp;threshold=0)">(/DianaTools/index.php?<br/>r=miroT_CDS/results&amp;keywords=mmu-<br/>miR-27a-<br/>3p%20ENSMUSG00000014932&amp;genes=ENSMUSG00000014932&amp;mirnas=mmu-<br/>miR-27a-<br/>3p&amp;threshold=0)</a> |
| Evi5 (mmu) ⓘ      | mmu-miR-27a-3p ⓘ |    | 0.555<br><a href="(/DianaTools/index.php?r=miroT_CDS/results&amp;keywords=mmu-miR-27a-3p%20ENSMUSG00000011831&amp;genes=ENSMUSG00000011831&amp;mirnas=mmu-miR-27a-3p&amp;threshold=0)">(/DianaTools/index.php?<br/>r=miroT_CDS/results&amp;keywords=mmu-<br/>miR-27a-<br/>3p%20ENSMUSG00000011831&amp;genes=ENSMUSG00000011831&amp;mirnas=mmu-<br/>miR-27a-<br/>3p&amp;threshold=0)</a> |
| Smurf2 (mmu) ⓘ    | mmu-miR-27a-3p ⓘ |    | 0.553<br><a href="(/DianaTools/index.php?r=miroT_CDS/results&amp;keywords=mmu-miR-27a-3p%20ENSMUSG00000018363&amp;genes=ENSMUSG00000018363&amp;mirnas=mmu-miR-27a-3p&amp;threshold=0)">(/DianaTools/index.php?<br/>r=miroT_CDS/results&amp;keywords=mmu-<br/>miR-27a-<br/>3p%20ENSMUSG00000018363&amp;genes=ENSMUSG00000018363&amp;mirnas=mmu-<br/>miR-27a-<br/>3p&amp;threshold=0)</a> |
| Ikzf3 (mmu) ⓘ     | mmu-miR-27a-3p ⓘ |    | 0.534<br><a href="(/DianaTools/index.php?r=miroT_CDS/results&amp;keywords=mmu-miR-27a-3p%20ENSMUSG00000018168&amp;genes=ENSMUSG00000018168&amp;mirnas=mmu-miR-27a-3p&amp;threshold=0)">(/DianaTools/index.php?<br/>r=miroT_CDS/results&amp;keywords=mmu-<br/>miR-27a-<br/>3p%20ENSMUSG00000018168&amp;genes=ENSMUSG00000018168&amp;mirnas=mmu-<br/>miR-27a-<br/>3p&amp;threshold=0)</a> |
| Anp32e (mmu) ⓘ    | mmu-miR-27a-3p ⓘ |    | 0.517<br><a href="(/DianaTools/index.php?r=miroT_CDS/results&amp;keywords=mmu-miR-27a-3p%20ENSMUSG00000015749&amp;genes=ENSMUSG00000015749&amp;mirnas=mmu-miR-27a-3p&amp;threshold=0)">(/DianaTools/index.php?<br/>r=miroT_CDS/results&amp;keywords=mmu-<br/>miR-27a-<br/>3p%20ENSMUSG00000015749&amp;genes=ENSMUSG00000015749&amp;mirnas=mmu-<br/>miR-27a-<br/>3p&amp;threshold=0)</a> |
| Ppp1cb (mmu) ⓘ    | mmu-miR-27a-3p ⓘ |    | 0.514<br><a href="(/DianaTools/index.php?r=miroT_CDS/results&amp;keywords=mmu-miR-27a-3p%20ENSMUSG00000014956&amp;genes=ENSMUSG00000014956&amp;mirnas=mmu-miR-27a-3p&amp;threshold=0)">(/DianaTools/index.php?<br/>r=miroT_CDS/results&amp;keywords=mmu-<br/>miR-27a-<br/>3p%20ENSMUSG00000014956&amp;genes=ENSMUSG00000014956&amp;mirnas=mmu-<br/>miR-27a-<br/>3p&amp;threshold=0)</a> |
| Ppp1cb (mmu) ⓘ    | mmu-miR-27a-3p ⓘ |    | 0.514<br><a href="(/DianaTools/index.php?r=miroT_CDS/results&amp;keywords=mmu-miR-27a-3p%20ENSMUSG00000014956&amp;genes=ENSMUSG00000014956&amp;mirnas=mmu-miR-27a-3p&amp;threshold=0)">(/DianaTools/index.php?<br/>r=miroT_CDS/results&amp;keywords=mmu-<br/>miR-27a-<br/>3p%20ENSMUSG00000014956&amp;genes=ENSMUSG00000014956&amp;mirnas=mmu-<br/>miR-27a-<br/>3p&amp;threshold=0)</a> |
| Cwc25 (mmu) ⓘ     | mmu-miR-27a-3p ⓘ |  | 0.513<br><a href="(/DianaTools/index.php?r=miroT_CDS/results&amp;keywords=mmu-miR-27a-3p%20ENSMUSG00000018541&amp;genes=ENSMUSG00000018541&amp;mirnas=mmu-miR-27a-3p&amp;threshold=0)">(/DianaTools/index.php?<br/>r=miroT_CDS/results&amp;keywords=mmu-<br/>miR-27a-<br/>3p%20ENSMUSG00000018541&amp;genes=ENSMUSG00000018541&amp;mirnas=mmu-<br/>miR-27a-<br/>3p&amp;threshold=0)</a> |
| Fads1 (mmu) ⓘ     | mmu-miR-27a-3p ⓘ |  | 0.512<br><a href="(/DianaTools/index.php?r=miroT_CDS/results&amp;keywords=mmu-miR-27a-3p%20ENSMUSG00000010663&amp;genes=ENSMUSG00000010663&amp;mirnas=mmu-miR-27a-3p&amp;threshold=0)">(/DianaTools/index.php?<br/>r=miroT_CDS/results&amp;keywords=mmu-<br/>miR-27a-<br/>3p%20ENSMUSG00000010663&amp;genes=ENSMUSG00000010663&amp;mirnas=mmu-<br/>miR-27a-<br/>3p&amp;threshold=0)</a> |
| Nipsnap3b (mmu) ⓘ | mmu-miR-27a-3p ⓘ |  | 0.501<br><a href="(/DianaTools/index.php?r=miroT_CDS/results&amp;keywords=mmu-miR-27a-3p%20ENSMUSG00000015247&amp;genes=ENSMUSG00000015247&amp;mirnas=mmu-miR-27a-3p&amp;threshold=0)">(/DianaTools/index.php?<br/>r=miroT_CDS/results&amp;keywords=mmu-<br/>miR-27a-<br/>3p%20ENSMUSG00000015247&amp;genes=ENSMUSG00000015247&amp;mirnas=mmu-<br/>miR-27a-<br/>3p&amp;threshold=0)</a> |
| Nipsnap3b (mmu) ⓘ | mmu-miR-27a-3p ⓘ |  | 0.501<br><a href="(/DianaTools/index.php?r=miroT_CDS/results&amp;keywords=mmu-miR-27a-3p%20ENSMUSG00000015247&amp;genes=ENSMUSG00000015247&amp;mirnas=mmu-miR-27a-3p&amp;threshold=0)">(/DianaTools/index.php?<br/>r=miroT_CDS/results&amp;keywords=mmu-<br/>miR-27a-<br/>3p%20ENSMUSG00000015247&amp;genes=ENSMUSG00000015247&amp;mirnas=mmu-<br/>miR-27a-<br/>3p&amp;threshold=0)</a> |

We have placed cookies on your device to help make this website and the services we offer better. By using this site, you agree to the use of cookies. [Learn more](#) ([\(/DianaTools/index.php?r=site/terms\)]((/DianaTools/index.php?r=site/terms))).

I accept

|                 |                  |                                                                                      |                                                                                                                                                                                                                                                                                                                                                                                           |
|-----------------|------------------|--------------------------------------------------------------------------------------|-------------------------------------------------------------------------------------------------------------------------------------------------------------------------------------------------------------------------------------------------------------------------------------------------------------------------------------------------------------------------------------------|
| Cd274 (mmu) ⓘ   | mmu-miR-27a-3p ⓘ |    | 0.498<br><a href="(/DianaTools/index.php?r=microT_CDS/results&amp;keywords=mmu-miR-27a-3p%20ENSMUSG00000016496&amp;genes=ENSMUSG00000016496&amp;mirnas=mmu-miR-27a-3p&amp;threshold=0)">(/DianaTools/index.php?<br/>r=microT_CDS/results&amp;keywords=mmu-<br/>miR-27a-<br/>3p%20ENSMUSG00000016496&amp;genes=ENSMUSG00000016496&amp;mirnas=mmu-<br/>miR-27a-<br/>3p&amp;threshold=0)</a> |
| Arnt2 (mmu) ⓘ   | mmu-miR-27a-3p ⓘ |    | 0.480<br><a href="(/DianaTools/index.php?r=microT_CDS/results&amp;keywords=mmu-miR-27a-3p%20ENSMUSG00000015709&amp;genes=ENSMUSG00000015709&amp;mirnas=mmu-miR-27a-3p&amp;threshold=0)">(/DianaTools/index.php?<br/>r=microT_CDS/results&amp;keywords=mmu-<br/>miR-27a-<br/>3p%20ENSMUSG00000015709&amp;genes=ENSMUSG00000015709&amp;mirnas=mmu-<br/>miR-27a-<br/>3p&amp;threshold=0)</a> |
| Rhot1 (mmu) ⓘ   | mmu-miR-27a-3p ⓘ |    | 0.479<br><a href="(/DianaTools/index.php?r=microT_CDS/results&amp;keywords=mmu-miR-27a-3p%20ENSMUSG00000017686&amp;genes=ENSMUSG00000017686&amp;mirnas=mmu-miR-27a-3p&amp;threshold=0)">(/DianaTools/index.php?<br/>r=microT_CDS/results&amp;keywords=mmu-<br/>miR-27a-<br/>3p%20ENSMUSG00000017686&amp;genes=ENSMUSG00000017686&amp;mirnas=mmu-<br/>miR-27a-<br/>3p&amp;threshold=0)</a> |
| Sqstm1 (mmu) ⓘ  | mmu-miR-27a-3p ⓘ |    | 0.460<br><a href="(/DianaTools/index.php?r=microT_CDS/results&amp;keywords=mmu-miR-27a-3p%20ENSMUSG00000015837&amp;genes=ENSMUSG00000015837&amp;mirnas=mmu-miR-27a-3p&amp;threshold=0)">(/DianaTools/index.php?<br/>r=microT_CDS/results&amp;keywords=mmu-<br/>miR-27a-<br/>3p%20ENSMUSG00000015837&amp;genes=ENSMUSG00000015837&amp;mirnas=mmu-<br/>miR-27a-<br/>3p&amp;threshold=0)</a> |
| Tox4 (mmu) ⓘ    | mmu-miR-27a-3p ⓘ |    | 0.453<br><a href="(/DianaTools/index.php?r=microT_CDS/results&amp;keywords=mmu-miR-27a-3p%20ENSMUSG00000016831&amp;genes=ENSMUSG00000016831&amp;mirnas=mmu-miR-27a-3p&amp;threshold=0)">(/DianaTools/index.php?<br/>r=microT_CDS/results&amp;keywords=mmu-<br/>miR-27a-<br/>3p%20ENSMUSG00000016831&amp;genes=ENSMUSG00000016831&amp;mirnas=mmu-<br/>miR-27a-<br/>3p&amp;threshold=0)</a> |
| Clpx (mmu) ⓘ    | mmu-miR-27a-3p ⓘ |    | -                                                                                                                                                                                                                                                                                                                                                                                         |
| C1qtnf1 (mmu) ⓘ | mmu-miR-27a-3p ⓘ |    | -                                                                                                                                                                                                                                                                                                                                                                                         |
| Ppil4 (mmu) ⓘ   | mmu-miR-27a-3p ⓘ |    | -                                                                                                                                                                                                                                                                                                                                                                                         |
| Hivep2 (mmu) ⓘ  | mmu-miR-27a-3p ⓘ |    | -                                                                                                                                                                                                                                                                                                                                                                                         |
| Atad5 (mmu) ⓘ   | mmu-miR-27a-3p ⓘ |    | -                                                                                                                                                                                                                                                                                                                                                                                         |
| Hnrnp1 (mmu) ⓘ  | mmu-miR-27a-3p ⓘ |   | -                                                                                                                                                                                                                                                                                                                                                                                         |
| Pdhx (mmu) ⓘ    | mmu-miR-27a-3p ⓘ |  | -                                                                                                                                                                                                                                                                                                                                                                                         |
| Med1 (mmu) ⓘ    | mmu-miR-27a-3p ⓘ |  | -                                                                                                                                                                                                                                                                                                                                                                                         |
| Lcor1 (mmu) ⓘ   | mmu-miR-27a-3p ⓘ |  | -                                                                                                                                                                                                                                                                                                                                                                                         |
| Klhl3 (mmu) ⓘ   | mmu-miR-27a-3p ⓘ |  | -                                                                                                                                                                                                                                                                                                                                                                                         |
| Sdc4 (mmu) ⓘ    | mmu-miR-27a-3p ⓘ |  | -                                                                                                                                                                                                                                                                                                                                                                                         |
| Ptprs (mmu) ⓘ   | mmu-miR-27a-3p ⓘ |  | -                                                                                                                                                                                                                                                                                                                                                                                         |
| Ankrd52 (mmu) ⓘ | mmu-miR-27a-3p ⓘ |  | -                                                                                                                                                                                                                                                                                                                                                                                         |
| Arrb1 (mmu) ⓘ   | mmu-miR-27a-3p ⓘ |  | -                                                                                                                                                                                                                                                                                                                                                                                         |
| Eef1a2 (mmu) ⓘ  | mmu-miR-27a-3p ⓘ |  | -                                                                                                                                                                                                                                                                                                                                                                                         |
| Top2b (mmu) ⓘ   | mmu-miR-27a-3p ⓘ |  | -                                                                                                                                                                                                                                                                                                                                                                                         |
| Igln5 (mmu) ⓘ   | mmu-miR-27a-3p ⓘ |  | -                                                                                                                                                                                                                                                                                                                                                                                         |
| Abi3 (mmu) ⓘ    | mmu-miR-27a-3p ⓘ |  | -                                                                                                                                                                                                                                                                                                                                                                                         |

We have placed cookies on your device to help make this website and the services we offer better. By using this site, you agree to the use of cookies. [Learn more \(/DianaTools/index.php?r=site/terms\)]((/DianaTools/index.php?r=site/terms)).

I accept

|                                                                                                  |                                                                                                    |                                                                                      |                                                                                                                                                                                                                                                                                                                                                                                 |
|--------------------------------------------------------------------------------------------------|----------------------------------------------------------------------------------------------------|--------------------------------------------------------------------------------------|---------------------------------------------------------------------------------------------------------------------------------------------------------------------------------------------------------------------------------------------------------------------------------------------------------------------------------------------------------------------------------|
| Derl2 (mmu)      | mmu-miR-27a-3p     |     | -                                                                                                                                                                                                                                                                                                                                                                               |
| Vtn (mmu)       | mmu-miR-27a-3p    |    | -                                                                                                                                                                                                                                                                                                                                                                               |
| Dedd (mmu)      | mmu-miR-27a-3p    |    | -                                                                                                                                                                                                                                                                                                                                                                               |
| Efr3a (mmu)     | mmu-miR-27a-3p    |    | -                                                                                                                                                                                                                                                                                                                                                                               |
| Atraid (mmu)    | mmu-miR-27a-3p    |    | -                                                                                                                                                                                                                                                                                                                                                                               |
| Gdi1 (mmu)      | mmu-miR-27a-3p    |    | -                                                                                                                                                                                                                                                                                                                                                                               |
| Arnt (mmu)      | mmu-miR-27a-3p    |    | -                                                                                                                                                                                                                                                                                                                                                                               |
| Atp6v0e (mmu)   | mmu-miR-27a-3p    |    | -                                                                                                                                                                                                                                                                                                                                                                               |
| Rars (mmu)      | mmu-miR-27a-3p    |    | -                                                                                                                                                                                                                                                                                                                                                                               |
| Kctd5 (mmu)     | mmu-miR-27a-3p    |    | -                                                                                                                                                                                                                                                                                                                                                                               |
| Trim37 (mmu)    | mmu-miR-27a-3p    |    | -                                                                                                                                                                                                                                                                                                                                                                               |
| Atp6v0a1 (mmu)  | mmu-miR-27a-3p    |    | -                                                                                                                                                                                                                                                                                                                                                                               |
| Chd3 (mmu)      | mmu-miR-27a-3p    |    | -                                                                                                                                                                                                                                                                                                                                                                               |
| Kif1a (mmu)     | mmu-miR-27a-3p    |    | -                                                                                                                                                                                                                                                                                                                                                                               |
| Sec14l4 (mmu)   | mmu-miR-27a-3p    |    | -                                                                                                                                                                                                                                                                                                                                                                               |
| Atp6v0d1 (mmu)  | mmu-miR-27a-3p    |    | -                                                                                                                                                                                                                                                                                                                                                                               |
| Atp6v0d1 (mmu)  | mmu-miR-27a-3p    |    | -                                                                                                                                                                                                                                                                                                                                                                               |
| Gabarap (mmu)   | mmu-miR-27a-3p    |    | -                                                                                                                                                                                                                                                                                                                                                                               |
| Taok1 (mmu)     | mmu-miR-27a-3p    |    | -                                                                                                                                                                                                                                                                                                                                                                               |
| Slc12a5 (mmu)  | mmu-miR-27a-3p   |   | -                                                                                                                                                                                                                                                                                                                                                                               |
| Sept8 (mmu)   | mmu-miR-27a-3p  |  | -                                                                                                                                                                                                                                                                                                                                                                               |
| Srsf1 (mmu)   | mmu-miR-27a-3p  |  | -                                                                                                                                                                                                                                                                                                                                                                               |
| Nbr1 (mmu)    | mmu-miR-27a-3p  |  | -                                                                                                                                                                                                                                                                                                                                                                               |
| Btg2 (mmu)    | mmu-miR-27a-3p  |  | <p>0.998<br/> <a href="http://DianaTools/index.php?r=miroT_CDS/results&amp;keywords=mmu-miR-27a-3p%20ENSMUSG00000020423&amp;genes=ENSMUSG00000020423&amp;mirnas=mmu-miR-27a-3p&amp;threshold=0">http://DianaTools/index.php?r=miroT_CDS/results&amp;keywords=mmu-miR-27a-3p%20ENSMUSG00000020423&amp;genes=ENSMUSG00000020423&amp;mirnas=mmu-miR-27a-3p&amp;threshold=0</a></p> |
| Itsn2 (mmu)   | mmu-miR-27a-3p  |  | <p>0.996<br/> <a href="http://DianaTools/index.php?r=miroT_CDS/results&amp;keywords=mmu-miR-27a-3p%20ENSMUSG00000020640&amp;genes=ENSMUSG00000020640&amp;mirnas=mmu-miR-27a-3p&amp;threshold=0">http://DianaTools/index.php?r=miroT_CDS/results&amp;keywords=mmu-miR-27a-3p%20ENSMUSG00000020640&amp;genes=ENSMUSG00000020640&amp;mirnas=mmu-miR-27a-3p&amp;threshold=0</a></p> |
| E2f7 (mmu)    | mmu-miR-27a-3p  |  | <p>0.993<br/> <a href="http://DianaTools/index.php?r=miroT_CDS/results&amp;keywords=mmu-miR-27a-3p%20ENSMUSG00000020185&amp;genes=ENSMUSG00000020185&amp;mirnas=mmu-miR-27a-3p&amp;threshold=0">http://DianaTools/index.php?r=miroT_CDS/results&amp;keywords=mmu-miR-27a-3p%20ENSMUSG00000020185&amp;genes=ENSMUSG00000020185&amp;mirnas=mmu-miR-27a-3p&amp;threshold=0</a></p> |

We have placed cookies on your device to help make this website and the services we offer better. By using this site, you agree to the use of cookies. [Learn more](#) (<http://DianaTools/index.php?r=site/terms>).

I accept

|                 |                  |                                                                                      |                                                                                                                                                                                                               |
|-----------------|------------------|--------------------------------------------------------------------------------------|---------------------------------------------------------------------------------------------------------------------------------------------------------------------------------------------------------------|
| Sema6a (mmu) ⓘ  | mmu-miR-27a-3p ⓘ |    | <a href="#">0.992</a><br><a href="#">(/DianaTools/index.php?r=microT_CDS/results&amp;keywords=mmu-miR-27a-3p%20ENSMUSG00000019647&amp;genes=ENSMUSG00000019647&amp;mirnas=mmu-miR-27a-3p&amp;threshold=0)</a> |
| Csrp2 (mmu) ⓘ   | mmu-miR-27a-3p ⓘ |    | <a href="#">0.978</a><br><a href="#">(/DianaTools/index.php?r=microT_CDS/results&amp;keywords=mmu-miR-27a-3p%20ENSMUSG00000020186&amp;genes=ENSMUSG00000020186&amp;mirnas=mmu-miR-27a-3p&amp;threshold=0)</a> |
| Fgd6 (mmu) ⓘ    | mmu-miR-27a-3p ⓘ |    | <a href="#">0.971</a><br><a href="#">(/DianaTools/index.php?r=microT_CDS/results&amp;keywords=mmu-miR-27a-3p%20ENSMUSG00000020021&amp;genes=ENSMUSG00000020021&amp;mirnas=mmu-miR-27a-3p&amp;threshold=0)</a> |
| Mknk2 (mmu) ⓘ   | mmu-miR-27a-3p ⓘ |    | <a href="#">0.945</a><br><a href="#">(/DianaTools/index.php?r=microT_CDS/results&amp;keywords=mmu-miR-27a-3p%20ENSMUSG00000020190&amp;genes=ENSMUSG00000020190&amp;mirnas=mmu-miR-27a-3p&amp;threshold=0)</a> |
| Mknk2 (mmu) ⓘ   | mmu-miR-27a-3p ⓘ |    | <a href="#">0.945</a><br><a href="#">(/DianaTools/index.php?r=microT_CDS/results&amp;keywords=mmu-miR-27a-3p%20ENSMUSG00000020190&amp;genes=ENSMUSG00000020190&amp;mirnas=mmu-miR-27a-3p&amp;threshold=0)</a> |
| Rps6kb1 (mmu) ⓘ | mmu-miR-27a-3p ⓘ |    | <a href="#">0.944</a><br><a href="#">(/DianaTools/index.php?r=microT_CDS/results&amp;keywords=mmu-miR-27a-3p%20ENSMUSG00000020516&amp;genes=ENSMUSG00000020516&amp;mirnas=mmu-miR-27a-3p&amp;threshold=0)</a> |
| Plek (mmu) ⓘ    | mmu-miR-27a-3p ⓘ |    | <a href="#">0.905</a><br><a href="#">(/DianaTools/index.php?r=microT_CDS/results&amp;keywords=mmu-miR-27a-3p%20ENSMUSG00000020120&amp;genes=ENSMUSG00000020120&amp;mirnas=mmu-miR-27a-3p&amp;threshold=0)</a> |
| Atp2b1 (mmu) ⓘ  | mmu-miR-27a-3p ⓘ |  | <a href="#">0.900</a><br><a href="#">(/DianaTools/index.php?r=microT_CDS/results&amp;keywords=mmu-miR-27a-3p%20ENSMUSG00000019943&amp;genes=ENSMUSG00000019943&amp;mirnas=mmu-miR-27a-3p&amp;threshold=0)</a> |
| Vip (mmu) ⓘ     | mmu-miR-27a-3p ⓘ |  | <a href="#">0.858</a><br><a href="#">(/DianaTools/index.php?r=microT_CDS/results&amp;keywords=mmu-miR-27a-3p%20ENSMUSG00000019772&amp;genes=ENSMUSG00000019772&amp;mirnas=mmu-miR-27a-3p&amp;threshold=0)</a> |
| Egfr (mmu) ⓘ    | mmu-miR-27a-3p ⓘ |  | <a href="#">0.839</a><br><a href="#">(/DianaTools/index.php?r=microT_CDS/results&amp;keywords=mmu-miR-27a-3p%20ENSMUSG00000020122&amp;genes=ENSMUSG00000020122&amp;mirnas=mmu-miR-27a-3p&amp;threshold=0)</a> |
| Erlc1 (mmu) ⓘ   | mmu-miR-27a-3p ⓘ |  | <a href="#">0.804</a><br><a href="#">(/DianaTools/index.php?r=microT_CDS/results&amp;keywords=mmu-miR-27a-3p%20ENSMUSG00000020311&amp;genes=ENSMUSG00000020311&amp;mirnas=mmu-miR-27a-3p&amp;threshold=0)</a> |

We have placed cookies on your device to help make this website and the services we offer better. By using this site, you agree to the use of cookies. [Learn more](#) ([/DianaTools/index.php?r=site/terms](#)).

I accept

|                 |                  |                                                                                      |                                                                                                                                                                                                                       |
|-----------------|------------------|--------------------------------------------------------------------------------------|-----------------------------------------------------------------------------------------------------------------------------------------------------------------------------------------------------------------------|
| Lpin1 (mmu) ⓘ   | mmu-miR-27a-3p ⓘ |    | <p><a href="#">0.785</a><br/> <a href="#">(/DianaTools/index.php?r=miroT_CDS/results&amp;keywords=mmu-miR-27a-3p%20ENSMUSG00000020593&amp;genes=ENSMUSG00000020593&amp;mirnas=mmu-miR-27a-3p&amp;threshold=0)</a></p> |
| Ccng1 (mmu) ⓘ   | mmu-miR-27a-3p ⓘ |    | <p><a href="#">0.779</a><br/> <a href="#">(/DianaTools/index.php?r=miroT_CDS/results&amp;keywords=mmu-miR-27a-3p%20ENSMUSG00000020326&amp;genes=ENSMUSG00000020326&amp;mirnas=mmu-miR-27a-3p&amp;threshold=0)</a></p> |
| Rnft1 (mmu) ⓘ   | mmu-miR-27a-3p ⓘ |    | <p><a href="#">0.756</a><br/> <a href="#">(/DianaTools/index.php?r=miroT_CDS/results&amp;keywords=mmu-miR-27a-3p%20ENSMUSG00000020521&amp;genes=ENSMUSG00000020521&amp;mirnas=mmu-miR-27a-3p&amp;threshold=0)</a></p> |
| Dcbd1 (mmu) ⓘ   | mmu-miR-27a-3p ⓘ |    | <p><a href="#">0.710</a><br/> <a href="#">(/DianaTools/index.php?r=miroT_CDS/results&amp;keywords=mmu-miR-27a-3p%20ENSMUSG00000019891&amp;genes=ENSMUSG00000019891&amp;mirnas=mmu-miR-27a-3p&amp;threshold=0)</a></p> |
| Fyn (mmu) ⓘ     | mmu-miR-27a-3p ⓘ |    | <p><a href="#">0.688</a><br/> <a href="#">(/DianaTools/index.php?r=miroT_CDS/results&amp;keywords=mmu-miR-27a-3p%20ENSMUSG00000019843&amp;genes=ENSMUSG00000019843&amp;mirnas=mmu-miR-27a-3p&amp;threshold=0)</a></p> |
| Ptprb (mmu) ⓘ   | mmu-miR-27a-3p ⓘ |    | <p><a href="#">0.684</a><br/> <a href="#">(/DianaTools/index.php?r=miroT_CDS/results&amp;keywords=mmu-miR-27a-3p%20ENSMUSG00000020154&amp;genes=ENSMUSG00000020154&amp;mirnas=mmu-miR-27a-3p&amp;threshold=0)</a></p> |
| Ptprb (mmu) ⓘ   | mmu-miR-27a-3p ⓘ |   | <p><a href="#">0.684</a><br/> <a href="#">(/DianaTools/index.php?r=miroT_CDS/results&amp;keywords=mmu-miR-27a-3p%20ENSMUSG00000020154&amp;genes=ENSMUSG00000020154&amp;mirnas=mmu-miR-27a-3p&amp;threshold=0)</a></p> |
| Fbxo5 (mmu) ⓘ   | mmu-miR-27a-3p ⓘ |  | <p><a href="#">0.684</a><br/> <a href="#">(/DianaTools/index.php?r=miroT_CDS/results&amp;keywords=mmu-miR-27a-3p%20ENSMUSG00000019773&amp;genes=ENSMUSG00000019773&amp;mirnas=mmu-miR-27a-3p&amp;threshold=0)</a></p> |
| Ptprk (mmu) ⓘ   | mmu-miR-27a-3p ⓘ |  | <p><a href="#">0.676</a><br/> <a href="#">(/DianaTools/index.php?r=miroT_CDS/results&amp;keywords=mmu-miR-27a-3p%20ENSMUSG00000019889&amp;genes=ENSMUSG00000019889&amp;mirnas=mmu-miR-27a-3p&amp;threshold=0)</a></p> |
| Cdk17 (mmu) ⓘ   | mmu-miR-27a-3p ⓘ |  | <p><a href="#">0.670</a><br/> <a href="#">(/DianaTools/index.php?r=miroT_CDS/results&amp;keywords=mmu-miR-27a-3p%20ENSMUSG00000020015&amp;genes=ENSMUSG00000020015&amp;mirnas=mmu-miR-27a-3p&amp;threshold=0)</a></p> |
| Tnfaip3 (mmu) ⓘ | mmu-miR-27a-3p ⓘ |  | <p><a href="#">0.657</a><br/> <a href="#">(/DianaTools/index.php?r=miroT_CDS/results&amp;keywords=mmu-miR-27a-3p%20ENSMUSG00000019850&amp;genes=ENSMUSG00000019850&amp;mirnas=mmu-miR-27a-3p&amp;threshold=0)</a></p> |

We have placed cookies on your device to help make this website and the services we offer better. By using this site, you agree to the use of cookies. [Learn more](#) ([/DianaTools/index.php?r=site/terms](#)).

I accept

|                  |                  |                                                                                      |                                                                                                                                                                                                                                                                                                                                                                                  |
|------------------|------------------|--------------------------------------------------------------------------------------|----------------------------------------------------------------------------------------------------------------------------------------------------------------------------------------------------------------------------------------------------------------------------------------------------------------------------------------------------------------------------------|
| Adcy1 (mmu) ⓘ    | mmu-miR-27a-3p ⓘ |    | <a href="#">0.634</a><br><a href="(/DianaTools/index.php?r=microT_CDS/results&amp;keywords=mmu-miR-27a-3p%20ENSMUSG00000020431&amp;genes=ENSMUSG00000020431&amp;mirnas=mmu-miR-27a-3p&amp;threshold=0)">(/DianaTools/index.php?r=microT_CDS/results&amp;keywords=mmu-miR-27a-3p%20ENSMUSG00000020431&amp;genes=ENSMUSG00000020431&amp;mirnas=mmu-miR-27a-3p&amp;threshold=0)</a> |
| Ska2 (mmu) ⓘ     | mmu-miR-27a-3p ⓘ |    | <a href="#">0.617</a><br><a href="(/DianaTools/index.php?r=microT_CDS/results&amp;keywords=mmu-miR-27a-3p%20ENSMUSG00000020492&amp;genes=ENSMUSG00000020492&amp;mirnas=mmu-miR-27a-3p&amp;threshold=0)">(/DianaTools/index.php?r=microT_CDS/results&amp;keywords=mmu-miR-27a-3p%20ENSMUSG00000020492&amp;genes=ENSMUSG00000020492&amp;mirnas=mmu-miR-27a-3p&amp;threshold=0)</a> |
| Arid3a (mmu) ⓘ   | mmu-miR-27a-3p ⓘ |    | <a href="#">0.603</a><br><a href="(/DianaTools/index.php?r=microT_CDS/results&amp;keywords=mmu-miR-27a-3p%20ENSMUSG00000019564&amp;genes=ENSMUSG00000019564&amp;mirnas=mmu-miR-27a-3p&amp;threshold=0)">(/DianaTools/index.php?r=microT_CDS/results&amp;keywords=mmu-miR-27a-3p%20ENSMUSG00000019564&amp;genes=ENSMUSG00000019564&amp;mirnas=mmu-miR-27a-3p&amp;threshold=0)</a> |
| Ggnbp2 (mmu) ⓘ   | mmu-miR-27a-3p ⓘ |    | <a href="#">0.582</a><br><a href="(/DianaTools/index.php?r=microT_CDS/results&amp;keywords=mmu-miR-27a-3p%20ENSMUSG00000020530&amp;genes=ENSMUSG00000020530&amp;mirnas=mmu-miR-27a-3p&amp;threshold=0)">(/DianaTools/index.php?r=microT_CDS/results&amp;keywords=mmu-miR-27a-3p%20ENSMUSG00000020530&amp;genes=ENSMUSG00000020530&amp;mirnas=mmu-miR-27a-3p&amp;threshold=0)</a> |
| Reep3 (mmu) ⓘ    | mmu-miR-27a-3p ⓘ |    | <a href="#">0.574</a><br><a href="(/DianaTools/index.php?r=microT_CDS/results&amp;keywords=mmu-miR-27a-3p%20ENSMUSG00000019873&amp;genes=ENSMUSG00000019873&amp;mirnas=mmu-miR-27a-3p&amp;threshold=0)">(/DianaTools/index.php?r=microT_CDS/results&amp;keywords=mmu-miR-27a-3p%20ENSMUSG00000019873&amp;genes=ENSMUSG00000019873&amp;mirnas=mmu-miR-27a-3p&amp;threshold=0)</a> |
| Sypl (mmu) ⓘ     | mmu-miR-27a-3p ⓘ |    | <a href="#">0.540</a><br><a href="(/DianaTools/index.php?r=microT_CDS/results&amp;keywords=mmu-miR-27a-3p%20ENSMUSG00000020570&amp;genes=ENSMUSG00000020570&amp;mirnas=mmu-miR-27a-3p&amp;threshold=0)">(/DianaTools/index.php?r=microT_CDS/results&amp;keywords=mmu-miR-27a-3p%20ENSMUSG00000020570&amp;genes=ENSMUSG00000020570&amp;mirnas=mmu-miR-27a-3p&amp;threshold=0)</a> |
| Sept10 (mmu) ⓘ   | mmu-miR-27a-3p ⓘ |   | <a href="#">0.536</a><br><a href="(/DianaTools/index.php?r=microT_CDS/results&amp;keywords=mmu-miR-27a-3p%20ENSMUSG00000019917&amp;genes=ENSMUSG00000019917&amp;mirnas=mmu-miR-27a-3p&amp;threshold=0)">(/DianaTools/index.php?r=microT_CDS/results&amp;keywords=mmu-miR-27a-3p%20ENSMUSG00000019917&amp;genes=ENSMUSG00000019917&amp;mirnas=mmu-miR-27a-3p&amp;threshold=0)</a> |
| Lyst (mmu) ⓘ     | mmu-miR-27a-3p ⓘ |  | <a href="#">0.534</a><br><a href="(/DianaTools/index.php?r=microT_CDS/results&amp;keywords=mmu-miR-27a-3p%20ENSMUSG00000019726&amp;genes=ENSMUSG00000019726&amp;mirnas=mmu-miR-27a-3p&amp;threshold=0)">(/DianaTools/index.php?r=microT_CDS/results&amp;keywords=mmu-miR-27a-3p%20ENSMUSG00000019726&amp;genes=ENSMUSG00000019726&amp;mirnas=mmu-miR-27a-3p&amp;threshold=0)</a> |
| Fam114a2 (mmu) ⓘ | mmu-miR-27a-3p ⓘ |  | <a href="#">0.532</a><br><a href="(/DianaTools/index.php?r=microT_CDS/results&amp;keywords=mmu-miR-27a-3p%20ENSMUSG00000020523&amp;genes=ENSMUSG00000020523&amp;mirnas=mmu-miR-27a-3p&amp;threshold=0)">(/DianaTools/index.php?r=microT_CDS/results&amp;keywords=mmu-miR-27a-3p%20ENSMUSG00000020523&amp;genes=ENSMUSG00000020523&amp;mirnas=mmu-miR-27a-3p&amp;threshold=0)</a> |
| Acl6 (mmu) ⓘ     | mmu-miR-27a-3p ⓘ |  | <a href="#">0.523</a><br><a href="(/DianaTools/index.php?r=microT_CDS/results&amp;keywords=mmu-miR-27a-3p%20ENSMUSG00000020333&amp;genes=ENSMUSG00000020333&amp;mirnas=mmu-miR-27a-3p&amp;threshold=0)">(/DianaTools/index.php?r=microT_CDS/results&amp;keywords=mmu-miR-27a-3p%20ENSMUSG00000020333&amp;genes=ENSMUSG00000020333&amp;mirnas=mmu-miR-27a-3p&amp;threshold=0)</a> |
| Canx (mmu) ⓘ     | mmu-miR-27a-3p ⓘ |  | <a href="#">0.522</a><br><a href="(/DianaTools/index.php?r=microT_CDS/results&amp;keywords=mmu-miR-27a-3p%20ENSMUSG00000020368&amp;genes=ENSMUSG00000020368&amp;mirnas=mmu-miR-27a-3p&amp;threshold=0)">(/DianaTools/index.php?r=microT_CDS/results&amp;keywords=mmu-miR-27a-3p%20ENSMUSG00000020368&amp;genes=ENSMUSG00000020368&amp;mirnas=mmu-miR-27a-3p&amp;threshold=0)</a> |

We have placed cookies on your device to help make this website and the services we offer better. By using this site, you agree to the use of cookies. [Learn more](#) ([/DianaTools/index.php?r=site/terms]((/DianaTools/index.php?r=site/terms))).

I accept

|                 |                  |                                                                                      |                                                                                                                                                                                                                                                                                                                                                                                           |
|-----------------|------------------|--------------------------------------------------------------------------------------|-------------------------------------------------------------------------------------------------------------------------------------------------------------------------------------------------------------------------------------------------------------------------------------------------------------------------------------------------------------------------------------------|
| Cand1 (mmu) ⓘ   | mmu-miR-27a-3p ⓘ |    | 0.516<br><a href="(/DianaTools/index.php?r=microT_CDS/results&amp;keywords=mmu-miR-27a-3p%20ENSMUSG00000020114&amp;genes=ENSMUSG00000020114&amp;mirnas=mmu-miR-27a-3p&amp;threshold=0)">(/DianaTools/index.php?<br/>r=microT_CDS/results&amp;keywords=mmu-<br/>miR-27a-<br/>3p%20ENSMUSG00000020114&amp;genes=ENSMUSG00000020114&amp;mirnas=mmu-<br/>miR-27a-<br/>3p&amp;threshold=0)</a> |
| Sar1a (mmu) ⓘ   | mmu-miR-27a-3p ⓘ |    | 0.516<br><a href="(/DianaTools/index.php?r=microT_CDS/results&amp;keywords=mmu-miR-27a-3p%20ENSMUSG00000020088&amp;genes=ENSMUSG00000020088&amp;mirnas=mmu-miR-27a-3p&amp;threshold=0)">(/DianaTools/index.php?<br/>r=microT_CDS/results&amp;keywords=mmu-<br/>miR-27a-<br/>3p%20ENSMUSG00000020088&amp;genes=ENSMUSG00000020088&amp;mirnas=mmu-<br/>miR-27a-<br/>3p&amp;threshold=0)</a> |
| Pctp (mmu) ⓘ    | mmu-miR-27a-3p ⓘ |    | 0.502<br><a href="(/DianaTools/index.php?r=microT_CDS/results&amp;keywords=mmu-miR-27a-3p%20ENSMUSG00000020553&amp;genes=ENSMUSG00000020553&amp;mirnas=mmu-miR-27a-3p&amp;threshold=0)">(/DianaTools/index.php?<br/>r=microT_CDS/results&amp;keywords=mmu-<br/>miR-27a-<br/>3p%20ENSMUSG00000020553&amp;genes=ENSMUSG00000020553&amp;mirnas=mmu-<br/>miR-27a-<br/>3p&amp;threshold=0)</a> |
| Amz2 (mmu) ⓘ    | mmu-miR-27a-3p ⓘ |    | 0.500<br><a href="(/DianaTools/index.php?r=microT_CDS/results&amp;keywords=mmu-miR-27a-3p%20ENSMUSG00000020610&amp;genes=ENSMUSG00000020610&amp;mirnas=mmu-miR-27a-3p&amp;threshold=0)">(/DianaTools/index.php?<br/>r=microT_CDS/results&amp;keywords=mmu-<br/>miR-27a-<br/>3p%20ENSMUSG00000020610&amp;genes=ENSMUSG00000020610&amp;mirnas=mmu-<br/>miR-27a-<br/>3p&amp;threshold=0)</a> |
| Arid5b (mmu) ⓘ  | mmu-miR-27a-3p ⓘ |    | 0.490<br><a href="(/DianaTools/index.php?r=microT_CDS/results&amp;keywords=mmu-miR-27a-3p%20ENSMUSG00000019947&amp;genes=ENSMUSG00000019947&amp;mirnas=mmu-miR-27a-3p&amp;threshold=0)">(/DianaTools/index.php?<br/>r=microT_CDS/results&amp;keywords=mmu-<br/>miR-27a-<br/>3p%20ENSMUSG00000019947&amp;genes=ENSMUSG00000019947&amp;mirnas=mmu-<br/>miR-27a-<br/>3p&amp;threshold=0)</a> |
| Hnrnpab (mmu) ⓘ | mmu-miR-27a-3p ⓘ |    | 0.487<br><a href="(/DianaTools/index.php?r=microT_CDS/results&amp;keywords=mmu-miR-27a-3p%20ENSMUSG00000020358&amp;genes=ENSMUSG00000020358&amp;mirnas=mmu-miR-27a-3p&amp;threshold=0)">(/DianaTools/index.php?<br/>r=microT_CDS/results&amp;keywords=mmu-<br/>miR-27a-<br/>3p%20ENSMUSG00000020358&amp;genes=ENSMUSG00000020358&amp;mirnas=mmu-<br/>miR-27a-<br/>3p&amp;threshold=0)</a> |
| Hsp90b1 (mmu) ⓘ | mmu-miR-27a-3p ⓘ |    | 0.478<br><a href="(/DianaTools/index.php?r=microT_CDS/results&amp;keywords=mmu-miR-27a-3p%20ENSMUSG00000020048&amp;genes=ENSMUSG00000020048&amp;mirnas=mmu-miR-27a-3p&amp;threshold=0)">(/DianaTools/index.php?<br/>r=microT_CDS/results&amp;keywords=mmu-<br/>miR-27a-<br/>3p%20ENSMUSG00000020048&amp;genes=ENSMUSG00000020048&amp;mirnas=mmu-<br/>miR-27a-<br/>3p&amp;threshold=0)</a> |
| Hsp90b1 (mmu) ⓘ | mmu-miR-27a-3p ⓘ |  | 0.478<br><a href="(/DianaTools/index.php?r=microT_CDS/results&amp;keywords=mmu-miR-27a-3p%20ENSMUSG00000020048&amp;genes=ENSMUSG00000020048&amp;mirnas=mmu-miR-27a-3p&amp;threshold=0)">(/DianaTools/index.php?<br/>r=microT_CDS/results&amp;keywords=mmu-<br/>miR-27a-<br/>3p%20ENSMUSG00000020048&amp;genes=ENSMUSG00000020048&amp;mirnas=mmu-<br/>miR-27a-<br/>3p&amp;threshold=0)</a> |
| Ube2b (mmu) ⓘ   | mmu-miR-27a-3p ⓘ |  | 0.473<br><a href="(/DianaTools/index.php?r=microT_CDS/results&amp;keywords=mmu-miR-27a-3p%20ENSMUSG00000020390&amp;genes=ENSMUSG00000020390&amp;mirnas=mmu-miR-27a-3p&amp;threshold=0)">(/DianaTools/index.php?<br/>r=microT_CDS/results&amp;keywords=mmu-<br/>miR-27a-<br/>3p%20ENSMUSG00000020390&amp;genes=ENSMUSG00000020390&amp;mirnas=mmu-<br/>miR-27a-<br/>3p&amp;threshold=0)</a> |
| Ube2b (mmu) ⓘ   | mmu-miR-27a-3p ⓘ |  | 0.473<br><a href="(/DianaTools/index.php?r=microT_CDS/results&amp;keywords=mmu-miR-27a-3p%20ENSMUSG00000020390&amp;genes=ENSMUSG00000020390&amp;mirnas=mmu-miR-27a-3p&amp;threshold=0)">(/DianaTools/index.php?<br/>r=microT_CDS/results&amp;keywords=mmu-<br/>miR-27a-<br/>3p%20ENSMUSG00000020390&amp;genes=ENSMUSG00000020390&amp;mirnas=mmu-<br/>miR-27a-<br/>3p&amp;threshold=0)</a> |
| Glytk1 (mmu) ⓘ  | mmu-miR-27a-3p ⓘ |  | 0.472<br><a href="(/DianaTools/index.php?r=microT_CDS/results&amp;keywords=mmu-miR-27a-3p%20ENSMUSG00000020258&amp;genes=ENSMUSG00000020258&amp;mirnas=mmu-miR-27a-3p&amp;threshold=0)">(/DianaTools/index.php?<br/>r=microT_CDS/results&amp;keywords=mmu-<br/>miR-27a-<br/>3p%20ENSMUSG00000020258&amp;genes=ENSMUSG00000020258&amp;mirnas=mmu-<br/>miR-27a-<br/>3p&amp;threshold=0)</a> |

We have placed cookies on your device to help make this website and the services we offer better. By using this site, you agree to the use of cookies. [Learn more](#) ([\(/DianaTools/index.php?r=site/terms\)]((/DianaTools/index.php?r=site/terms))).

I accept



|              |  |                |  |                                                                                                                                                                                  |
|--------------|--|----------------|--|----------------------------------------------------------------------------------------------------------------------------------------------------------------------------------|
|              |  |                |  | 0.458<br>(/DianaTools/index.php?<br>r=miroT_CDS/results&keywords=mmu-<br>miR-27a-<br>3p%20ENSMUSG00000020271&genes=ENSMUSG00000020271&mirnas=mmu-<br>miR-27a-<br>3p&threshold=0) |
| Fbxw11 (mmu) |  | mmu-miR-27a-3p |  |                                                                                                                                                                                  |
| Apob (mmu)   |  | mmu-miR-27a-3p |  |                                                                                                                                                                                  |
| Tmpo (mmu)   |  | mmu-miR-27a-3p |  |                                                                                                                                                                                  |
| Cnot2 (mmu)  |  | mmu-miR-27a-3p |  |                                                                                                                                                                                  |
| Dcbld1 (mmu) |  | mmu-miR-27a-3p |  |                                                                                                                                                                                  |
| Sgk1 (mmu)   |  | mmu-miR-27a-3p |  |                                                                                                                                                                                  |
| Vta1 (mmu)   |  | mmu-miR-27a-3p |  |                                                                                                                                                                                  |
| Dock2 (mmu)  |  | mmu-miR-27a-3p |  |                                                                                                                                                                                  |
| Limk2 (mmu)  |  | mmu-miR-27a-3p |  |                                                                                                                                                                                  |
| Mdm2 (mmu)   |  | mmu-miR-27a-3p |  |                                                                                                                                                                                  |
| Myb (mmu)    |  | mmu-miR-27a-3p |  |                                                                                                                                                                                  |
| Zwint (mmu)  |  | mmu-miR-27a-3p |  |                                                                                                                                                                                  |
| Med23 (mmu)  |  | mmu-miR-27a-3p |  |                                                                                                                                                                                  |
| Rtn4 (mmu)   |  | mmu-miR-27a-3p |  |                                                                                                                                                                                  |
| Mdh1 (mmu)   |  | mmu-miR-27a-3p |  |                                                                                                                                                                                  |
| Mdh1 (mmu)   |  | mmu-miR-27a-3p |  |                                                                                                                                                                                  |
| Sgk1 (mmu)   |  | mmu-miR-27a-3p |  |                                                                                                                                                                                  |
| Rev3l (mmu)  |  | mmu-miR-27a-3p |  |                                                                                                                                                                                  |
| Frs2 (mmu)   |  | mmu-miR-27a-3p |  |                                                                                                                                                                                  |
| Nefh (mmu)   |  | mmu-miR-27a-3p |  |                                                                                                                                                                                  |
| Cep83 (mmu)  |  | mmu-miR-27a-3p |  |                                                                                                                                                                                  |
| Fyn (mmu)    |  | mmu-miR-27a-3p |  |                                                                                                                                                                                  |
| Usp15 (mmu)  |  | mmu-miR-27a-3p |  |                                                                                                                                                                                  |
| Usp15 (mmu)  |  | mmu-miR-27a-3p |  |                                                                                                                                                                                  |
| Hcfc2 (mmu)  |  | mmu-miR-27a-3p |  |                                                                                                                                                                                  |
| Ap3d1 (mmu)  |  | mmu-miR-27a-3p |  |                                                                                                                                                                                  |
| Gria1 (mmu)  |  | mmu-miR-27a-3p |  |                                                                                                                                                                                  |
| Rab21 (mmu)  |  | mmu-miR-27a-3p |  |                                                                                                                                                                                  |
| Trib2 (mmu)  |  | mmu-miR-27a-3p |  |                                                                                                                                                                                  |
| Arg1 (mmu)   |  | mmu-miR-27a-3p |  |                                                                                                                                                                                  |

We have placed cookies on your device to help make this website and the services we offer better. By using this site, you agree to the use of cookies. [Learn more \(/DianaTools/index.php?r=site/terms\)](/DianaTools/index.php?r=site/terms).

I accept

|                                                                                                   |                                                                                                    |                                                                                      |                                                                                                                                                                                                                                                                                                                                                                                     |
|---------------------------------------------------------------------------------------------------|----------------------------------------------------------------------------------------------------|--------------------------------------------------------------------------------------|-------------------------------------------------------------------------------------------------------------------------------------------------------------------------------------------------------------------------------------------------------------------------------------------------------------------------------------------------------------------------------------|
| Nbas (mmu)        | mmu-miR-27a-3p     |     | -                                                                                                                                                                                                                                                                                                                                                                                   |
| Nbas (mmu)       | mmu-miR-27a-3p    |    | -                                                                                                                                                                                                                                                                                                                                                                                   |
| Rwdd1 (mmu)      | mmu-miR-27a-3p    |    | -                                                                                                                                                                                                                                                                                                                                                                                   |
| Zwint (mmu)      | mmu-miR-27a-3p    |    | -                                                                                                                                                                                                                                                                                                                                                                                   |
| Katna1 (mmu)     | mmu-miR-27a-3p    |    | -                                                                                                                                                                                                                                                                                                                                                                                   |
| Cnot6 (mmu)      | mmu-miR-27a-3p    |    | -                                                                                                                                                                                                                                                                                                                                                                                   |
| Plagl1 (mmu)     | mmu-miR-27a-3p    |    | -                                                                                                                                                                                                                                                                                                                                                                                   |
| Unc5b (mmu)      | mmu-miR-27a-3p    |    | -                                                                                                                                                                                                                                                                                                                                                                                   |
| Xbp1 (mmu)       | mmu-miR-27a-3p    |    | -                                                                                                                                                                                                                                                                                                                                                                                   |
| Nts (mmu)        | mmu-miR-27a-3p    |    | -                                                                                                                                                                                                                                                                                                                                                                                   |
| Laptm4a (mmu)    | mmu-miR-27a-3p    |    | -                                                                                                                                                                                                                                                                                                                                                                                   |
| Pum2 (mmu)       | mmu-miR-27a-3p    |    | -                                                                                                                                                                                                                                                                                                                                                                                   |
| Hspa4 (mmu)      | mmu-miR-27a-3p    |    | -                                                                                                                                                                                                                                                                                                                                                                                   |
| Hspa4 (mmu)      | mmu-miR-27a-3p    |    | -                                                                                                                                                                                                                                                                                                                                                                                   |
| Stxbp5 (mmu)     | mmu-miR-27a-3p    |    | -                                                                                                                                                                                                                                                                                                                                                                                   |
| Peli1 (mmu)      | mmu-miR-27a-3p    |    | -                                                                                                                                                                                                                                                                                                                                                                                   |
| Atp2b1 (mmu)     | mmu-miR-27a-3p    |    | -                                                                                                                                                                                                                                                                                                                                                                                   |
| Elf4enif1 (mmu)  | mmu-miR-27a-3p    |    | -                                                                                                                                                                                                                                                                                                                                                                                   |
| Echdc1 (mmu)     | mmu-miR-27a-3p    |    | -                                                                                                                                                                                                                                                                                                                                                                                   |
| Osbpl8 (mmu)    | mmu-miR-27a-3p   |   | -                                                                                                                                                                                                                                                                                                                                                                                   |
| Ifngr1 (mmu)   | mmu-miR-27a-3p  |  | -                                                                                                                                                                                                                                                                                                                                                                                   |
| Tns3 (mmu)     | mmu-miR-27a-3p  |  | -                                                                                                                                                                                                                                                                                                                                                                                   |
| Apaf1 (mmu)    | mmu-miR-27a-3p  |  | -                                                                                                                                                                                                                                                                                                                                                                                   |
| Plk2 (mmu)     | mmu-miR-27a-3p  |  | <p><b>1.000</b><br/> <a href="http://DianaTools/index.php?r=miroT_CDS/results&amp;keywords=mmu-miR-27a-3p%20ENSMUSG00000021701&amp;genes=ENSMUSG00000021701&amp;mirnas=mmu-miR-27a-3p&amp;threshold=0"> (/DianaTools/index.php?r=miroT_CDS/results&amp;keywords=mmu-miR-27a-3p%20ENSMUSG00000021701&amp;genes=ENSMUSG00000021701&amp;mirnas=mmu-miR-27a-3p&amp;threshold=0)</a></p> |
| Fam193b (mmu)  | mmu-miR-27a-3p  |  | <p><b>0.999</b><br/> <a href="http://DianaTools/index.php?r=miroT_CDS/results&amp;keywords=mmu-miR-27a-3p%20ENSMUSG00000021495&amp;genes=ENSMUSG00000021495&amp;mirnas=mmu-miR-27a-3p&amp;threshold=0"> (/DianaTools/index.php?r=miroT_CDS/results&amp;keywords=mmu-miR-27a-3p%20ENSMUSG00000021495&amp;genes=ENSMUSG00000021495&amp;mirnas=mmu-miR-27a-3p&amp;threshold=0)</a></p> |
| Ccnk (mmu)     | mmu-miR-27a-3p  |  | <p><b>0.998</b><br/> <a href="http://DianaTools/index.php?r=miroT_CDS/results&amp;keywords=mmu-miR-27a-3p%20ENSMUSG00000021258&amp;genes=ENSMUSG00000021258&amp;mirnas=mmu-miR-27a-3p&amp;threshold=0"> (/DianaTools/index.php?r=miroT_CDS/results&amp;keywords=mmu-miR-27a-3p%20ENSMUSG00000021258&amp;genes=ENSMUSG00000021258&amp;mirnas=mmu-miR-27a-3p&amp;threshold=0)</a></p> |

We have placed cookies on your device to help make this website and the services we offer better. By using this site, you agree to the use of cookies. [Learn more](#) ([/DianaTools/index.php?r=site/terms](http://DianaTools/index.php?r=site/terms)).

I accept

|                 |                  |                                                                                      |                                                                                                                                                                                               |
|-----------------|------------------|--------------------------------------------------------------------------------------|-----------------------------------------------------------------------------------------------------------------------------------------------------------------------------------------------|
| Rps6ka5 (mmu) ⓘ | mmu-miR-27a-3p ⓘ |    | 0.996<br><a href="#">(/DianaTools/index.php?r=microT_CDS/results&amp;keywords=mmu-miR-27a-3p%20ENSMUSG00000021180&amp;genes=ENSMUSG00000021180&amp;mirnas=mmu-miR-27a-3p&amp;threshold=0)</a> |
| Rps6ka5 (mmu) ⓘ | mmu-miR-27a-3p ⓘ |    | 0.996<br><a href="#">(/DianaTools/index.php?r=microT_CDS/results&amp;keywords=mmu-miR-27a-3p%20ENSMUSG00000021180&amp;genes=ENSMUSG00000021180&amp;mirnas=mmu-miR-27a-3p&amp;threshold=0)</a> |
| Nova1 (mmu) ⓘ   | mmu-miR-27a-3p ⓘ |    | 0.994<br><a href="#">(/DianaTools/index.php?r=microT_CDS/results&amp;keywords=mmu-miR-27a-3p%20ENSMUSG00000021047&amp;genes=ENSMUSG00000021047&amp;mirnas=mmu-miR-27a-3p&amp;threshold=0)</a> |
| Zfp361 (mmu) ⓘ  | mmu-miR-27a-3p ⓘ |    | 0.975<br><a href="#">(/DianaTools/index.php?r=microT_CDS/results&amp;keywords=mmu-miR-27a-3p%20ENSMUSG00000021127&amp;genes=ENSMUSG00000021127&amp;mirnas=mmu-miR-27a-3p&amp;threshold=0)</a> |
| Zfp361 (mmu) ⓘ  | mmu-miR-27a-3p ⓘ |    | 0.975<br><a href="#">(/DianaTools/index.php?r=microT_CDS/results&amp;keywords=mmu-miR-27a-3p%20ENSMUSG00000021127&amp;genes=ENSMUSG00000021127&amp;mirnas=mmu-miR-27a-3p&amp;threshold=0)</a> |
| Hmgcr (mmu) ⓘ   | mmu-miR-27a-3p ⓘ |    | 0.935<br><a href="#">(/DianaTools/index.php?r=microT_CDS/results&amp;keywords=mmu-miR-27a-3p%20ENSMUSG00000021670&amp;genes=ENSMUSG00000021670&amp;mirnas=mmu-miR-27a-3p&amp;threshold=0)</a> |
| Acy (mmu) ⓘ     | mmu-miR-27a-3p ⓘ |    | 0.914<br><a href="#">(/DianaTools/index.php?r=microT_CDS/results&amp;keywords=mmu-miR-27a-3p%20ENSMUSG00000020917&amp;genes=ENSMUSG00000020917&amp;mirnas=mmu-miR-27a-3p&amp;threshold=0)</a> |
| Nf1 (mmu) ⓘ     | mmu-miR-27a-3p ⓘ |  | 0.889<br><a href="#">(/DianaTools/index.php?r=microT_CDS/results&amp;keywords=mmu-miR-27a-3p%20ENSMUSG00000020716&amp;genes=ENSMUSG00000020716&amp;mirnas=mmu-miR-27a-3p&amp;threshold=0)</a> |
| Nsd1 (mmu) ⓘ    | mmu-miR-27a-3p ⓘ |  | 0.884<br><a href="#">(/DianaTools/index.php?r=microT_CDS/results&amp;keywords=mmu-miR-27a-3p%20ENSMUSG00000021488&amp;genes=ENSMUSG00000021488&amp;mirnas=mmu-miR-27a-3p&amp;threshold=0)</a> |
| Nup153 (mmu) ⓘ  | mmu-miR-27a-3p ⓘ |  | 0.843<br><a href="#">(/DianaTools/index.php?r=microT_CDS/results&amp;keywords=mmu-miR-27a-3p%20ENSMUSG00000021374&amp;genes=ENSMUSG00000021374&amp;mirnas=mmu-miR-27a-3p&amp;threshold=0)</a> |
| Hapln1 (mmu) ⓘ  | mmu-miR-27a-3p ⓘ |  | 0.798<br><a href="#">(/DianaTools/index.php?r=microT_CDS/results&amp;keywords=mmu-miR-27a-3p%20ENSMUSG00000021613&amp;genes=ENSMUSG00000021613&amp;mirnas=mmu-miR-27a-3p&amp;threshold=0)</a> |

We have placed cookies on your device to help make this website and the services we offer better. By using this site, you agree to the use of cookies. [Learn more](#) ([/DianaTools/index.php?r=site/terms](#)).

I accept

|                                                                                                       |                                                                                                    |                                                                                      |                                                                                                                                                                                                                                                                                                                                                                                           |
|-------------------------------------------------------------------------------------------------------|----------------------------------------------------------------------------------------------------|--------------------------------------------------------------------------------------|-------------------------------------------------------------------------------------------------------------------------------------------------------------------------------------------------------------------------------------------------------------------------------------------------------------------------------------------------------------------------------------------|
| Pcnx (mmu)           | mmu-miR-27a-3p    |    | 0.796<br><a href="(/DianaTools/index.php?r=microT_CDS/results&amp;keywords=mmu-miR-27a-3p%20ENSMUSG00000021140&amp;genes=ENSMUSG00000021140&amp;mirnas=mmu-miR-27a-3p&amp;threshold=0)">(/DianaTools/index.php?<br/>r=microT_CDS/results&amp;keywords=mmu-<br/>miR-27a-<br/>3p%20ENSMUSG00000021140&amp;genes=ENSMUSG00000021140&amp;mirnas=mmu-<br/>miR-27a-<br/>3p&amp;threshold=0)</a> |
| Ippk (mmu)           | mmu-miR-27a-3p    |    | 0.783<br><a href="(/DianaTools/index.php?r=microT_CDS/results&amp;keywords=mmu-miR-27a-3p%20ENSMUSG00000021385&amp;genes=ENSMUSG00000021385&amp;mirnas=mmu-miR-27a-3p&amp;threshold=0)">(/DianaTools/index.php?<br/>r=microT_CDS/results&amp;keywords=mmu-<br/>miR-27a-<br/>3p%20ENSMUSG00000021385&amp;genes=ENSMUSG00000021385&amp;mirnas=mmu-<br/>miR-27a-<br/>3p&amp;threshold=0)</a> |
| Sdha (mmu)           | mmu-miR-27a-3p    |    | 0.777<br><a href="(/DianaTools/index.php?r=microT_CDS/results&amp;keywords=mmu-miR-27a-3p%20ENSMUSG00000021577&amp;genes=ENSMUSG00000021577&amp;mirnas=mmu-miR-27a-3p&amp;threshold=0)">(/DianaTools/index.php?<br/>r=microT_CDS/results&amp;keywords=mmu-<br/>miR-27a-<br/>3p%20ENSMUSG00000021577&amp;genes=ENSMUSG00000021577&amp;mirnas=mmu-<br/>miR-27a-<br/>3p&amp;threshold=0)</a> |
| Sdha (mmu)           | mmu-miR-27a-3p    |    | 0.777<br><a href="(/DianaTools/index.php?r=microT_CDS/results&amp;keywords=mmu-miR-27a-3p%20ENSMUSG00000021577&amp;genes=ENSMUSG00000021577&amp;mirnas=mmu-miR-27a-3p&amp;threshold=0)">(/DianaTools/index.php?<br/>r=microT_CDS/results&amp;keywords=mmu-<br/>miR-27a-<br/>3p%20ENSMUSG00000021577&amp;genes=ENSMUSG00000021577&amp;mirnas=mmu-<br/>miR-27a-<br/>3p&amp;threshold=0)</a> |
| 4933426M11Rik (mmu)  | mmu-miR-27a-3p    |    | 0.771<br><a href="(/DianaTools/index.php?r=microT_CDS/results&amp;keywords=mmu-miR-27a-3p%20ENSMUSG00000021133&amp;genes=ENSMUSG00000021133&amp;mirnas=mmu-miR-27a-3p&amp;threshold=0)">(/DianaTools/index.php?<br/>r=microT_CDS/results&amp;keywords=mmu-<br/>miR-27a-<br/>3p%20ENSMUSG00000021133&amp;genes=ENSMUSG00000021133&amp;mirnas=mmu-<br/>miR-27a-<br/>3p&amp;threshold=0)</a> |
| Eif5 (mmu)           | mmu-miR-27a-3p    |    | 0.764<br><a href="(/DianaTools/index.php?r=microT_CDS/results&amp;keywords=mmu-miR-27a-3p%20ENSMUSG00000021282&amp;genes=ENSMUSG00000021282&amp;mirnas=mmu-miR-27a-3p&amp;threshold=0)">(/DianaTools/index.php?<br/>r=microT_CDS/results&amp;keywords=mmu-<br/>miR-27a-<br/>3p%20ENSMUSG00000021282&amp;genes=ENSMUSG00000021282&amp;mirnas=mmu-<br/>miR-27a-<br/>3p&amp;threshold=0)</a> |
| Eif5 (mmu)           | mmu-miR-27a-3p    |    | 0.764<br><a href="(/DianaTools/index.php?r=microT_CDS/results&amp;keywords=mmu-miR-27a-3p%20ENSMUSG00000021282&amp;genes=ENSMUSG00000021282&amp;mirnas=mmu-miR-27a-3p&amp;threshold=0)">(/DianaTools/index.php?<br/>r=microT_CDS/results&amp;keywords=mmu-<br/>miR-27a-<br/>3p%20ENSMUSG00000021282&amp;genes=ENSMUSG00000021282&amp;mirnas=mmu-<br/>miR-27a-<br/>3p&amp;threshold=0)</a> |
| Aggf1 (mmu)        | mmu-miR-27a-3p  |  | 0.761<br><a href="(/DianaTools/index.php?r=microT_CDS/results&amp;keywords=mmu-miR-27a-3p%20ENSMUSG00000021681&amp;genes=ENSMUSG00000021681&amp;mirnas=mmu-miR-27a-3p&amp;threshold=0)">(/DianaTools/index.php?<br/>r=microT_CDS/results&amp;keywords=mmu-<br/>miR-27a-<br/>3p%20ENSMUSG00000021681&amp;genes=ENSMUSG00000021681&amp;mirnas=mmu-<br/>miR-27a-<br/>3p&amp;threshold=0)</a> |
| Pdcd6 (mmu)        | mmu-miR-27a-3p  |  | 0.756<br><a href="(/DianaTools/index.php?r=microT_CDS/results&amp;keywords=mmu-miR-27a-3p%20ENSMUSG00000021576&amp;genes=ENSMUSG00000021576&amp;mirnas=mmu-miR-27a-3p&amp;threshold=0)">(/DianaTools/index.php?<br/>r=microT_CDS/results&amp;keywords=mmu-<br/>miR-27a-<br/>3p%20ENSMUSG00000021576&amp;genes=ENSMUSG00000021576&amp;mirnas=mmu-<br/>miR-27a-<br/>3p&amp;threshold=0)</a> |
| Cpd (mmu)          | mmu-miR-27a-3p  |  | 0.718<br><a href="(/DianaTools/index.php?r=microT_CDS/results&amp;keywords=mmu-miR-27a-3p%20ENSMUSG00000020841&amp;genes=ENSMUSG00000020841&amp;mirnas=mmu-miR-27a-3p&amp;threshold=0)">(/DianaTools/index.php?<br/>r=microT_CDS/results&amp;keywords=mmu-<br/>miR-27a-<br/>3p%20ENSMUSG00000020841&amp;genes=ENSMUSG00000020841&amp;mirnas=mmu-<br/>miR-27a-<br/>3p&amp;threshold=0)</a> |
| Cpd (mmu)          | mmu-miR-27a-3p  |  | 0.718<br><a href="(/DianaTools/index.php?r=microT_CDS/results&amp;keywords=mmu-miR-27a-3p%20ENSMUSG00000020841&amp;genes=ENSMUSG00000020841&amp;mirnas=mmu-miR-27a-3p&amp;threshold=0)">(/DianaTools/index.php?<br/>r=microT_CDS/results&amp;keywords=mmu-<br/>miR-27a-<br/>3p%20ENSMUSG00000020841&amp;genes=ENSMUSG00000020841&amp;mirnas=mmu-<br/>miR-27a-<br/>3p&amp;threshold=0)</a> |

We have placed cookies on your device to help make this website and the services we offer better. By using this site, you agree to the use of cookies. [Learn more](#) ([\(/DianaTools/index.php?r=site/terms\)]((/DianaTools/index.php?r=site/terms))).

I accept

|                       |                  |                                                                                      |                                                                                                                                                                                                                                                                                                                                                                                           |
|-----------------------|------------------|--------------------------------------------------------------------------------------|-------------------------------------------------------------------------------------------------------------------------------------------------------------------------------------------------------------------------------------------------------------------------------------------------------------------------------------------------------------------------------------------|
| Sfxn1 (mmu) ⓘ         | mmu-miR-27a-3p ⓘ |    | 0.712<br><a href="(/DianaTools/index.php?r=microT_CDS/results&amp;keywords=mmu-miR-27a-3p%20ENSMUSG00000021474&amp;genes=ENSMUSG00000021474&amp;mirnas=mmu-miR-27a-3p&amp;threshold=0)">(/DianaTools/index.php?<br/>r=microT_CDS/results&amp;keywords=mmu-<br/>miR-27a-<br/>3p%20ENSMUSG00000021474&amp;genes=ENSMUSG00000021474&amp;mirnas=mmu-<br/>miR-27a-<br/>3p&amp;threshold=0)</a> |
| Mpp5 (mmu) ⓘ          | mmu-miR-27a-3p ⓘ |    | 0.700<br><a href="(/DianaTools/index.php?r=microT_CDS/results&amp;keywords=mmu-miR-27a-3p%20ENSMUSG00000021112&amp;genes=ENSMUSG00000021112&amp;mirnas=mmu-miR-27a-3p&amp;threshold=0)">(/DianaTools/index.php?<br/>r=microT_CDS/results&amp;keywords=mmu-<br/>miR-27a-<br/>3p%20ENSMUSG00000021112&amp;genes=ENSMUSG00000021112&amp;mirnas=mmu-<br/>miR-27a-<br/>3p&amp;threshold=0)</a> |
| Mpp5 (mmu) ⓘ          | mmu-miR-27a-3p ⓘ |    | 0.700<br><a href="(/DianaTools/index.php?r=microT_CDS/results&amp;keywords=mmu-miR-27a-3p%20ENSMUSG00000021112&amp;genes=ENSMUSG00000021112&amp;mirnas=mmu-miR-27a-3p&amp;threshold=0)">(/DianaTools/index.php?<br/>r=microT_CDS/results&amp;keywords=mmu-<br/>miR-27a-<br/>3p%20ENSMUSG00000021112&amp;genes=ENSMUSG00000021112&amp;mirnas=mmu-<br/>miR-27a-<br/>3p&amp;threshold=0)</a> |
| Srd5a1 (mmu) ⓘ        | mmu-miR-27a-3p ⓘ |    | 0.696<br><a href="(/DianaTools/index.php?r=microT_CDS/results&amp;keywords=mmu-miR-27a-3p%20ENSMUSG00000021594&amp;genes=ENSMUSG00000021594&amp;mirnas=mmu-miR-27a-3p&amp;threshold=0)">(/DianaTools/index.php?<br/>r=microT_CDS/results&amp;keywords=mmu-<br/>miR-27a-<br/>3p%20ENSMUSG00000021594&amp;genes=ENSMUSG00000021594&amp;mirnas=mmu-<br/>miR-27a-<br/>3p&amp;threshold=0)</a> |
| Sgpp1 (mmu) ⓘ         | mmu-miR-27a-3p ⓘ |    | 0.661<br><a href="(/DianaTools/index.php?r=microT_CDS/results&amp;keywords=mmu-miR-27a-3p%20ENSMUSG00000021054&amp;genes=ENSMUSG00000021054&amp;mirnas=mmu-miR-27a-3p&amp;threshold=0)">(/DianaTools/index.php?<br/>r=microT_CDS/results&amp;keywords=mmu-<br/>miR-27a-<br/>3p%20ENSMUSG00000021054&amp;genes=ENSMUSG00000021054&amp;mirnas=mmu-<br/>miR-27a-<br/>3p&amp;threshold=0)</a> |
| Sgpp1 (mmu) ⓘ         | mmu-miR-27a-3p ⓘ |    | 0.661<br><a href="(/DianaTools/index.php?r=microT_CDS/results&amp;keywords=mmu-miR-27a-3p%20ENSMUSG00000021054&amp;genes=ENSMUSG00000021054&amp;mirnas=mmu-miR-27a-3p&amp;threshold=0)">(/DianaTools/index.php?<br/>r=microT_CDS/results&amp;keywords=mmu-<br/>miR-27a-<br/>3p%20ENSMUSG00000021054&amp;genes=ENSMUSG00000021054&amp;mirnas=mmu-<br/>miR-27a-<br/>3p&amp;threshold=0)</a> |
| 2010107E04Rik (mmu) ⓘ | mmu-miR-27a-3p ⓘ |    | 0.658<br><a href="(/DianaTools/index.php?r=microT_CDS/results&amp;keywords=mmu-miR-27a-3p%20ENSMUSG00000021290&amp;genes=ENSMUSG00000021290&amp;mirnas=mmu-miR-27a-3p&amp;threshold=0)">(/DianaTools/index.php?<br/>r=microT_CDS/results&amp;keywords=mmu-<br/>miR-27a-<br/>3p%20ENSMUSG00000021290&amp;genes=ENSMUSG00000021290&amp;mirnas=mmu-<br/>miR-27a-<br/>3p&amp;threshold=0)</a> |
| Cdca7l (mmu) ⓘ        | mmu-miR-27a-3p ⓘ |  | 0.637<br><a href="(/DianaTools/index.php?r=microT_CDS/results&amp;keywords=mmu-miR-27a-3p%20ENSMUSG00000021175&amp;genes=ENSMUSG00000021175&amp;mirnas=mmu-miR-27a-3p&amp;threshold=0)">(/DianaTools/index.php?<br/>r=microT_CDS/results&amp;keywords=mmu-<br/>miR-27a-<br/>3p%20ENSMUSG00000021175&amp;genes=ENSMUSG00000021175&amp;mirnas=mmu-<br/>miR-27a-<br/>3p&amp;threshold=0)</a> |
| Cdca7l (mmu) ⓘ        | mmu-miR-27a-3p ⓘ |  | 0.637<br><a href="(/DianaTools/index.php?r=microT_CDS/results&amp;keywords=mmu-miR-27a-3p%20ENSMUSG00000021175&amp;genes=ENSMUSG00000021175&amp;mirnas=mmu-miR-27a-3p&amp;threshold=0)">(/DianaTools/index.php?<br/>r=microT_CDS/results&amp;keywords=mmu-<br/>miR-27a-<br/>3p%20ENSMUSG00000021175&amp;genes=ENSMUSG00000021175&amp;mirnas=mmu-<br/>miR-27a-<br/>3p&amp;threshold=0)</a> |
| Prpf4b (mmu) ⓘ        | mmu-miR-27a-3p ⓘ |  | 0.636<br><a href="(/DianaTools/index.php?r=microT_CDS/results&amp;keywords=mmu-miR-27a-3p%20ENSMUSG00000021413&amp;genes=ENSMUSG00000021413&amp;mirnas=mmu-miR-27a-3p&amp;threshold=0)">(/DianaTools/index.php?<br/>r=microT_CDS/results&amp;keywords=mmu-<br/>miR-27a-<br/>3p%20ENSMUSG00000021413&amp;genes=ENSMUSG00000021413&amp;mirnas=mmu-<br/>miR-27a-<br/>3p&amp;threshold=0)</a> |
| Rab15 (mmu) ⓘ         | mmu-miR-27a-3p ⓘ |  | 0.636<br><a href="(/DianaTools/index.php?r=microT_CDS/results&amp;keywords=mmu-miR-27a-3p%20ENSMUSG00000021062&amp;genes=ENSMUSG00000021062&amp;mirnas=mmu-miR-27a-3p&amp;threshold=0)">(/DianaTools/index.php?<br/>r=microT_CDS/results&amp;keywords=mmu-<br/>miR-27a-<br/>3p%20ENSMUSG00000021062&amp;genes=ENSMUSG00000021062&amp;mirnas=mmu-<br/>miR-27a-<br/>3p&amp;threshold=0)</a> |

We have placed cookies on your device to help make this website and the services we offer better. By using this site, you agree to the use of cookies. [Learn more](#) ([\(/DianaTools/index.php?r=site/terms\)]((/DianaTools/index.php?r=site/terms)))

I accept

|                       |                  |                                                                                      |                                                                                                                                                                                                                                                                                                                                                                  |
|-----------------------|------------------|--------------------------------------------------------------------------------------|------------------------------------------------------------------------------------------------------------------------------------------------------------------------------------------------------------------------------------------------------------------------------------------------------------------------------------------------------------------|
| Rab10 (mmu) ⓘ         | mmu-miR-27a-3p ⓘ |    | 0.619<br><a href="(/DianaTools/index.php?r=microT_CDS/results&amp;keywords=mmu-miR-27a-3p%20ENSMUSG00000020671&amp;genes=ENSMUSG00000020671&amp;mirnas=mmu-miR-27a-3p&amp;threshold=0)">(/DianaTools/index.php?r=microT_CDS/results&amp;keywords=mmu-miR-27a-3p%20ENSMUSG00000020671&amp;genes=ENSMUSG00000020671&amp;mirnas=mmu-miR-27a-3p&amp;threshold=0)</a> |
| Cdc27 (mmu) ⓘ         | mmu-miR-27a-3p ⓘ |    | 0.617<br><a href="(/DianaTools/index.php?r=microT_CDS/results&amp;keywords=mmu-miR-27a-3p%20ENSMUSG00000020687&amp;genes=ENSMUSG00000020687&amp;mirnas=mmu-miR-27a-3p&amp;threshold=0)">(/DianaTools/index.php?r=microT_CDS/results&amp;keywords=mmu-miR-27a-3p%20ENSMUSG00000020687&amp;genes=ENSMUSG00000020687&amp;mirnas=mmu-miR-27a-3p&amp;threshold=0)</a> |
| Fbxl20 (mmu) ⓘ        | mmu-miR-27a-3p ⓘ |    | 0.594<br><a href="(/DianaTools/index.php?r=microT_CDS/results&amp;keywords=mmu-miR-27a-3p%20ENSMUSG00000020883&amp;genes=ENSMUSG00000020883&amp;mirnas=mmu-miR-27a-3p&amp;threshold=0)">(/DianaTools/index.php?r=microT_CDS/results&amp;keywords=mmu-miR-27a-3p%20ENSMUSG00000020883&amp;genes=ENSMUSG00000020883&amp;mirnas=mmu-miR-27a-3p&amp;threshold=0)</a> |
| Hnrnpk (mmu) ⓘ        | mmu-miR-27a-3p ⓘ |    | 0.574<br><a href="(/DianaTools/index.php?r=microT_CDS/results&amp;keywords=mmu-miR-27a-3p%20ENSMUSG00000021546&amp;genes=ENSMUSG00000021546&amp;mirnas=mmu-miR-27a-3p&amp;threshold=0)">(/DianaTools/index.php?r=microT_CDS/results&amp;keywords=mmu-miR-27a-3p%20ENSMUSG00000021546&amp;genes=ENSMUSG00000021546&amp;mirnas=mmu-miR-27a-3p&amp;threshold=0)</a> |
| Atp6v1d (mmu) ⓘ       | mmu-miR-27a-3p ⓘ |    | 0.561<br><a href="(/DianaTools/index.php?r=microT_CDS/results&amp;keywords=mmu-miR-27a-3p%20ENSMUSG00000021114&amp;genes=ENSMUSG00000021114&amp;mirnas=mmu-miR-27a-3p&amp;threshold=0)">(/DianaTools/index.php?r=microT_CDS/results&amp;keywords=mmu-miR-27a-3p%20ENSMUSG00000021114&amp;genes=ENSMUSG00000021114&amp;mirnas=mmu-miR-27a-3p&amp;threshold=0)</a> |
| Rad17 (mmu) ⓘ         | mmu-miR-27a-3p ⓘ |    | 0.559<br><a href="(/DianaTools/index.php?r=microT_CDS/results&amp;keywords=mmu-miR-27a-3p%20ENSMUSG00000021635&amp;genes=ENSMUSG00000021635&amp;mirnas=mmu-miR-27a-3p&amp;threshold=0)">(/DianaTools/index.php?r=microT_CDS/results&amp;keywords=mmu-miR-27a-3p%20ENSMUSG00000021635&amp;genes=ENSMUSG00000021635&amp;mirnas=mmu-miR-27a-3p&amp;threshold=0)</a> |
| Rffl (mmu) ⓘ          | mmu-miR-27a-3p ⓘ |    | 0.551<br><a href="(/DianaTools/index.php?r=microT_CDS/results&amp;keywords=mmu-miR-27a-3p%20ENSMUSG00000020696&amp;genes=ENSMUSG00000020696&amp;mirnas=mmu-miR-27a-3p&amp;threshold=0)">(/DianaTools/index.php?r=microT_CDS/results&amp;keywords=mmu-miR-27a-3p%20ENSMUSG00000020696&amp;genes=ENSMUSG00000020696&amp;mirnas=mmu-miR-27a-3p&amp;threshold=0)</a> |
| Col4a3bp (mmu) ⓘ      | mmu-miR-27a-3p ⓘ |  | 0.550<br><a href="(/DianaTools/index.php?r=microT_CDS/results&amp;keywords=mmu-miR-27a-3p%20ENSMUSG00000021669&amp;genes=ENSMUSG00000021669&amp;mirnas=mmu-miR-27a-3p&amp;threshold=0)">(/DianaTools/index.php?r=microT_CDS/results&amp;keywords=mmu-miR-27a-3p%20ENSMUSG00000021669&amp;genes=ENSMUSG00000021669&amp;mirnas=mmu-miR-27a-3p&amp;threshold=0)</a> |
| At1 (mmu) ⓘ           | mmu-miR-27a-3p ⓘ |  | 0.547<br><a href="(/DianaTools/index.php?r=microT_CDS/results&amp;keywords=mmu-miR-27a-3p%20ENSMUSG00000021066&amp;genes=ENSMUSG00000021066&amp;mirnas=mmu-miR-27a-3p&amp;threshold=0)">(/DianaTools/index.php?r=microT_CDS/results&amp;keywords=mmu-miR-27a-3p%20ENSMUSG00000021066&amp;genes=ENSMUSG00000021066&amp;mirnas=mmu-miR-27a-3p&amp;threshold=0)</a> |
| 0610007P14Rik (mmu) ⓘ | mmu-miR-27a-3p ⓘ |  | 0.522<br><a href="(/DianaTools/index.php?r=microT_CDS/results&amp;keywords=mmu-miR-27a-3p%20ENSMUSG00000021252&amp;genes=ENSMUSG00000021252&amp;mirnas=mmu-miR-27a-3p&amp;threshold=0)">(/DianaTools/index.php?r=microT_CDS/results&amp;keywords=mmu-miR-27a-3p%20ENSMUSG00000021252&amp;genes=ENSMUSG00000021252&amp;mirnas=mmu-miR-27a-3p&amp;threshold=0)</a> |
| Esyt2 (mmu) ⓘ         | mmu-miR-27a-3p ⓘ |  | 0.519<br><a href="(/DianaTools/index.php?r=microT_CDS/results&amp;keywords=mmu-miR-27a-3p%20ENSMUSG00000021171&amp;genes=ENSMUSG00000021171&amp;mirnas=mmu-miR-27a-3p&amp;threshold=0)">(/DianaTools/index.php?r=microT_CDS/results&amp;keywords=mmu-miR-27a-3p%20ENSMUSG00000021171&amp;genes=ENSMUSG00000021171&amp;mirnas=mmu-miR-27a-3p&amp;threshold=0)</a> |

We have placed cookies on your device to help make this website and the services we offer better. By using this site, you agree to the use of cookies. [Learn more](#) ([\(/DianaTools/index.php?r=site/terms\)]((/DianaTools/index.php?r=site/terms)))

I accept

|                 |                  |                                                                                      |                                                                                                                                                                                               |
|-----------------|------------------|--------------------------------------------------------------------------------------|-----------------------------------------------------------------------------------------------------------------------------------------------------------------------------------------------|
| Gstz1 (mmu) ⓘ   | mmu-miR-27a-3p ⓘ |    | 0.514<br><a href="#">(/DianaTools/index.php?r=microT_CDS/results&amp;keywords=mmu-miR-27a-3p%20ENSMUSG00000021033&amp;genes=ENSMUSG00000021033&amp;mirnas=mmu-miR-27a-3p&amp;threshold=0)</a> |
| Sptlc1 (mmu) ⓘ  | mmu-miR-27a-3p ⓘ |    | 0.496<br><a href="#">(/DianaTools/index.php?r=microT_CDS/results&amp;keywords=mmu-miR-27a-3p%20ENSMUSG00000021468&amp;genes=ENSMUSG00000021468&amp;mirnas=mmu-miR-27a-3p&amp;threshold=0)</a> |
| Pitrm1 (mmu) ⓘ  | mmu-miR-27a-3p ⓘ |    | 0.493<br><a href="#">(/DianaTools/index.php?r=microT_CDS/results&amp;keywords=mmu-miR-27a-3p%20ENSMUSG00000021193&amp;genes=ENSMUSG00000021193&amp;mirnas=mmu-miR-27a-3p&amp;threshold=0)</a> |
| Pitrm1 (mmu) ⓘ  | mmu-miR-27a-3p ⓘ |    | 0.493<br><a href="#">(/DianaTools/index.php?r=microT_CDS/results&amp;keywords=mmu-miR-27a-3p%20ENSMUSG00000021193&amp;genes=ENSMUSG00000021193&amp;mirnas=mmu-miR-27a-3p&amp;threshold=0)</a> |
| Zmynd11 (mmu) ⓘ | mmu-miR-27a-3p ⓘ |    | 0.485<br><a href="#">(/DianaTools/index.php?r=microT_CDS/results&amp;keywords=mmu-miR-27a-3p%20ENSMUSG00000021156&amp;genes=ENSMUSG00000021156&amp;mirnas=mmu-miR-27a-3p&amp;threshold=0)</a> |
| Helz (mmu) ⓘ    | mmu-miR-27a-3p ⓘ |    | 0.472<br><a href="#">(/DianaTools/index.php?r=microT_CDS/results&amp;keywords=mmu-miR-27a-3p%20ENSMUSG00000020721&amp;genes=ENSMUSG00000020721&amp;mirnas=mmu-miR-27a-3p&amp;threshold=0)</a> |
| Klhdc2 (mmu) ⓘ  | mmu-miR-27a-3p ⓘ |    | 0.471<br><a href="#">(/DianaTools/index.php?r=microT_CDS/results&amp;keywords=mmu-miR-27a-3p%20ENSMUSG00000020978&amp;genes=ENSMUSG00000020978&amp;mirnas=mmu-miR-27a-3p&amp;threshold=0)</a> |
| Sel1l (mmu) ⓘ   | mmu-miR-27a-3p ⓘ |  | 0.469<br><a href="#">(/DianaTools/index.php?r=microT_CDS/results&amp;keywords=mmu-miR-27a-3p%20ENSMUSG00000020964&amp;genes=ENSMUSG00000020964&amp;mirnas=mmu-miR-27a-3p&amp;threshold=0)</a> |
| Gpld1 (mmu) ⓘ   | mmu-miR-27a-3p ⓘ |  | 0.468<br><a href="#">(/DianaTools/index.php?r=microT_CDS/results&amp;keywords=mmu-miR-27a-3p%20ENSMUSG00000021340&amp;genes=ENSMUSG00000021340&amp;mirnas=mmu-miR-27a-3p&amp;threshold=0)</a> |
| Fut8 (mmu) ⓘ    | mmu-miR-27a-3p ⓘ |  | 0.464<br><a href="#">(/DianaTools/index.php?r=microT_CDS/results&amp;keywords=mmu-miR-27a-3p%20ENSMUSG00000021065&amp;genes=ENSMUSG00000021065&amp;mirnas=mmu-miR-27a-3p&amp;threshold=0)</a> |
| Trip11 (mmu) ⓘ  | mmu-miR-27a-3p ⓘ |  | 0.461<br><a href="#">(/DianaTools/index.php?r=microT_CDS/results&amp;keywords=mmu-miR-27a-3p%20ENSMUSG00000021188&amp;genes=ENSMUSG00000021188&amp;mirnas=mmu-miR-27a-3p&amp;threshold=0)</a> |

We have placed cookies on your device to help make this website and the services we offer better. By using this site, you agree to the use of cookies. [Learn more](#) ([/DianaTools/index.php?r=site/terms](#)).

I accept

|                       |                  |  |    |                                                                                                                                                                                  |
|-----------------------|------------------|--|----|----------------------------------------------------------------------------------------------------------------------------------------------------------------------------------|
|                       |                  |  |    | 0.456<br>(/DianaTools/index.php?<br>r=miroT_CDS/results&keywords=mmu-<br>miR-27a-<br>3p%20ENSMUSG00000021139&genes=ENSMUSG00000021139&mirnas=mmu-<br>miR-27a-<br>3p&threshold=0) |
| Gm20498 (mmu) ⓘ       | mmu-miR-27a-3p ⓘ |  | IP |                                                                                                                                                                                  |
| Ndufs6 (mmu) ⓘ        | mmu-miR-27a-3p ⓘ |  | IP | -                                                                                                                                                                                |
| Gcnt2 (mmu) ⓘ         | mmu-miR-27a-3p ⓘ |  | IP | -                                                                                                                                                                                |
| Irf4 (mmu) ⓘ          | mmu-miR-27a-3p ⓘ |  | IP | -                                                                                                                                                                                |
| Hif1a (mmu) ⓘ         | mmu-miR-27a-3p ⓘ |  | IP | -                                                                                                                                                                                |
| Smad5 (mmu) ⓘ         | mmu-miR-27a-3p ⓘ |  | IP | -                                                                                                                                                                                |
| Fkbp3 (mmu) ⓘ         | mmu-miR-27a-3p ⓘ |  | IP | -                                                                                                                                                                                |
| Luc7l3 (mmu) ⓘ        | mmu-miR-27a-3p ⓘ |  | IP | -                                                                                                                                                                                |
| Top2a (mmu) ⓘ         | mmu-miR-27a-3p ⓘ |  | IP | -                                                                                                                                                                                |
| Dnmt3a (mmu) ⓘ        | mmu-miR-27a-3p ⓘ |  | IP | -                                                                                                                                                                                |
| Ankrd40 (mmu) ⓘ       | mmu-miR-27a-3p ⓘ |  | IP | -                                                                                                                                                                                |
| Evl (mmu) ⓘ           | mmu-miR-27a-3p ⓘ |  | IP | -                                                                                                                                                                                |
| Scfd1 (mmu) ⓘ         | mmu-miR-27a-3p ⓘ |  | IP | -                                                                                                                                                                                |
| A530054K11Rik (mmu) ⓘ | mmu-miR-27a-3p ⓘ |  | IP | -                                                                                                                                                                                |
| A530054K11Rik (mmu) ⓘ | mmu-miR-27a-3p ⓘ |  | IP | -                                                                                                                                                                                |
| Sptb (mmu) ⓘ          | mmu-miR-27a-3p ⓘ |  | IP | -                                                                                                                                                                                |
| Papola (mmu) ⓘ        | mmu-miR-27a-3p ⓘ |  | IP | -                                                                                                                                                                                |
| Lpcat1 (mmu) ⓘ        | mmu-miR-27a-3p ⓘ |  | IP | -                                                                                                                                                                                |
| Tmem14c (mmu) ⓘ       | mmu-miR-27a-3p ⓘ |  | IP | -                                                                                                                                                                                |
| Dek (mmu) ⓘ           | mmu-miR-27a-3p ⓘ |  | IP | -                                                                                                                                                                                |
| Rasa1 (mmu) ⓘ         | mmu-miR-27a-3p ⓘ |  | IP | -                                                                                                                                                                                |
| Rasl10b (mmu) ⓘ       | mmu-miR-27a-3p ⓘ |  | IP | -                                                                                                                                                                                |
| Habp4 (mmu) ⓘ         | mmu-miR-27a-3p ⓘ |  | IP | -                                                                                                                                                                                |
| Auh (mmu) ⓘ           | mmu-miR-27a-3p ⓘ |  | IP | -                                                                                                                                                                                |
| Vash1 (mmu) ⓘ         | mmu-miR-27a-3p ⓘ |  | IP | -                                                                                                                                                                                |
| Mthfd1 (mmu) ⓘ        | mmu-miR-27a-3p ⓘ |  | IP | -                                                                                                                                                                                |
| Prpf8 (mmu) ⓘ         | mmu-miR-27a-3p ⓘ |  | IP | -                                                                                                                                                                                |
| Ppp1r13b (mmu) ⓘ      | mmu-miR-27a-3p ⓘ |  | IP | -                                                                                                                                                                                |
| Wdr37 (mmu) ⓘ         | mmu-miR-27a-3p ⓘ |  | IP | -                                                                                                                                                                                |
| Myh10 (mmu) ⓘ         | mmu-miR-27a-3p ⓘ |  | IP | -                                                                                                                                                                                |

We have placed cookies on your device to help make this website and the services we offer better. By using this site, you agree to the use of cookies. [Learn more](#) (/DianaTools/index.php?r=site/terms).

I accept



|                  |                  |                                                                                    |                                                                                                                                                                                                                                                                                                                                                                  |
|------------------|------------------|------------------------------------------------------------------------------------|------------------------------------------------------------------------------------------------------------------------------------------------------------------------------------------------------------------------------------------------------------------------------------------------------------------------------------------------------------------|
| Gtpbp4 (mmu) ⓘ   | mmu-miR-27a-3p ⓘ |   | -                                                                                                                                                                                                                                                                                                                                                                |
| Pacs2 (mmu) ⓘ    | mmu-miR-27a-3p ⓘ |  | -                                                                                                                                                                                                                                                                                                                                                                |
| Glx5 (mmu) ⓘ     | mmu-miR-27a-3p ⓘ |  | -                                                                                                                                                                                                                                                                                                                                                                |
| Gfap (mmu) ⓘ     | mmu-miR-27a-3p ⓘ |  | -                                                                                                                                                                                                                                                                                                                                                                |
| Ddx5 (mmu) ⓘ     | mmu-miR-27a-3p ⓘ |  | -                                                                                                                                                                                                                                                                                                                                                                |
| Ralgapa1 (mmu) ⓘ | mmu-miR-27a-3p ⓘ |  | -                                                                                                                                                                                                                                                                                                                                                                |
| Cacng4 (mmu) ⓘ   | mmu-miR-27a-3p ⓘ |  | -                                                                                                                                                                                                                                                                                                                                                                |
| Ankra2 (mmu) ⓘ   | mmu-miR-27a-3p ⓘ |  | -                                                                                                                                                                                                                                                                                                                                                                |
| Rhbd2 (mmu) ⓘ    | mmu-miR-27a-3p ⓘ |  | -                                                                                                                                                                                                                                                                                                                                                                |
| Zkscan3 (mmu) ⓘ  | mmu-miR-27a-3p ⓘ |  | -                                                                                                                                                                                                                                                                                                                                                                |
| Wrnip1 (mmu) ⓘ   | mmu-miR-27a-3p ⓘ |  | -                                                                                                                                                                                                                                                                                                                                                                |
| Dapk1 (mmu) ⓘ    | mmu-miR-27a-3p ⓘ |  | -                                                                                                                                                                                                                                                                                                                                                                |
| Spry2 (mmu) ⓘ    | mmu-miR-27a-3p ⓘ |  | 1.000<br><a href="(/DianaTools/index.php?r=microT_CDS/results&amp;keywords=mmu-miR-27a-3p%20ENSMUSG00000022114&amp;genes=ENSMUSG00000022114&amp;mirnas=mmu-miR-27a-3p&amp;threshold=0)">(/DianaTools/index.php?r=microT_CDS/results&amp;keywords=mmu-miR-27a-3p%20ENSMUSG00000022114&amp;genes=ENSMUSG00000022114&amp;mirnas=mmu-miR-27a-3p&amp;threshold=0)</a> |
| Plk2 (mmu) ⓘ     | mmu-miR-27a-3p ⓘ |  | 1.000<br><a href="(/DianaTools/index.php?r=microT_CDS/results&amp;keywords=mmu-miR-27a-3p%20ENSMUSG00000021701&amp;genes=ENSMUSG00000021701&amp;mirnas=mmu-miR-27a-3p&amp;threshold=0)">(/DianaTools/index.php?r=microT_CDS/results&amp;keywords=mmu-miR-27a-3p%20ENSMUSG00000021701&amp;genes=ENSMUSG00000021701&amp;mirnas=mmu-miR-27a-3p&amp;threshold=0)</a> |
| Trim23 (mmu) ⓘ   | mmu-miR-27a-3p ⓘ |  | 0.999<br><a href="(/DianaTools/index.php?r=microT_CDS/results&amp;keywords=mmu-miR-27a-3p%20ENSMUSG00000021712&amp;genes=ENSMUSG00000021712&amp;mirnas=mmu-miR-27a-3p&amp;threshold=0)">(/DianaTools/index.php?r=microT_CDS/results&amp;keywords=mmu-miR-27a-3p%20ENSMUSG00000021712&amp;genes=ENSMUSG00000021712&amp;mirnas=mmu-miR-27a-3p&amp;threshold=0)</a> |
| Cacna2d3 (mmu) ⓘ | mmu-miR-27a-3p ⓘ |  | 0.999<br><a href="(/DianaTools/index.php?r=microT_CDS/results&amp;keywords=mmu-miR-27a-3p%20ENSMUSG00000021991&amp;genes=ENSMUSG00000021991&amp;mirnas=mmu-miR-27a-3p&amp;threshold=0)">(/DianaTools/index.php?r=microT_CDS/results&amp;keywords=mmu-miR-27a-3p%20ENSMUSG00000021991&amp;genes=ENSMUSG00000021991&amp;mirnas=mmu-miR-27a-3p&amp;threshold=0)</a> |
| Zhx1 (mmu) ⓘ     | mmu-miR-27a-3p ⓘ |  | 0.997<br><a href="(/DianaTools/index.php?r=microT_CDS/results&amp;keywords=mmu-miR-27a-3p%20ENSMUSG00000022361&amp;genes=ENSMUSG00000022361&amp;mirnas=mmu-miR-27a-3p&amp;threshold=0)">(/DianaTools/index.php?r=microT_CDS/results&amp;keywords=mmu-miR-27a-3p%20ENSMUSG00000022361&amp;genes=ENSMUSG00000022361&amp;mirnas=mmu-miR-27a-3p&amp;threshold=0)</a> |
| Thrb (mmu) ⓘ     | mmu-miR-27a-3p ⓘ |  | 0.907<br><a href="(/DianaTools/index.php?r=microT_CDS/results&amp;keywords=mmu-miR-27a-3p%20ENSMUSG00000021779&amp;genes=ENSMUSG00000021779&amp;mirnas=mmu-miR-27a-3p&amp;threshold=0)">(/DianaTools/index.php?r=microT_CDS/results&amp;keywords=mmu-miR-27a-3p%20ENSMUSG00000021779&amp;genes=ENSMUSG00000021779&amp;mirnas=mmu-miR-27a-3p&amp;threshold=0)</a> |
| Fam49b (mmu) ⓘ   | mmu-miR-27a-3p ⓘ |  | 0.895<br><a href="(/DianaTools/index.php?r=microT_CDS/results&amp;keywords=mmu-miR-27a-3p%20ENSMUSG00000022378&amp;genes=ENSMUSG00000022378&amp;mirnas=mmu-miR-27a-3p&amp;threshold=0)">(/DianaTools/index.php?r=microT_CDS/results&amp;keywords=mmu-miR-27a-3p%20ENSMUSG00000022378&amp;genes=ENSMUSG00000022378&amp;mirnas=mmu-miR-27a-3p&amp;threshold=0)</a> |

We have placed cookies on your device to help make this website and the services we offer better. By using this site, you agree to the use of cookies. [Learn more](#) ([/DianaTools/index.php?r=site/terms]((/DianaTools/index.php?r=site/terms))).

I accept

|                 |                  |                                                                                      |                                                                                                                                                                                                                                                                                                                                                                                           |
|-----------------|------------------|--------------------------------------------------------------------------------------|-------------------------------------------------------------------------------------------------------------------------------------------------------------------------------------------------------------------------------------------------------------------------------------------------------------------------------------------------------------------------------------------|
| Nln (mmu) ⓘ     | mmu-miR-27a-3p ⓘ |    | 0.882<br><a href="(/DianaTools/index.php?r=microT_CDS/results&amp;keywords=mmu-miR-27a-3p%20ENSMUSG00000021710&amp;genes=ENSMUSG00000021710&amp;mirnas=mmu-miR-27a-3p&amp;threshold=0)">(/DianaTools/index.php?<br/>r=microT_CDS/results&amp;keywords=mmu-<br/>miR-27a-<br/>3p%20ENSMUSG00000021710&amp;genes=ENSMUSG00000021710&amp;mirnas=mmu-<br/>miR-27a-<br/>3p&amp;threshold=0)</a> |
| Sdc2 (mmu) ⓘ    | mmu-miR-27a-3p ⓘ |    | 0.866<br><a href="(/DianaTools/index.php?r=microT_CDS/results&amp;keywords=mmu-miR-27a-3p%20ENSMUSG00000022261&amp;genes=ENSMUSG00000022261&amp;mirnas=mmu-miR-27a-3p&amp;threshold=0)">(/DianaTools/index.php?<br/>r=microT_CDS/results&amp;keywords=mmu-<br/>miR-27a-<br/>3p%20ENSMUSG00000022261&amp;genes=ENSMUSG00000022261&amp;mirnas=mmu-<br/>miR-27a-<br/>3p&amp;threshold=0)</a> |
| Ppif (mmu) ⓘ    | mmu-miR-27a-3p ⓘ |    | 0.864<br><a href="(/DianaTools/index.php?r=microT_CDS/results&amp;keywords=mmu-miR-27a-3p%20ENSMUSG00000021868&amp;genes=ENSMUSG00000021868&amp;mirnas=mmu-miR-27a-3p&amp;threshold=0)">(/DianaTools/index.php?<br/>r=microT_CDS/results&amp;keywords=mmu-<br/>miR-27a-<br/>3p%20ENSMUSG00000021868&amp;genes=ENSMUSG00000021868&amp;mirnas=mmu-<br/>miR-27a-<br/>3p&amp;threshold=0)</a> |
| Utp23 (mmu) ⓘ   | mmu-miR-27a-3p ⓘ |    | 0.853<br><a href="(/DianaTools/index.php?r=microT_CDS/results&amp;keywords=mmu-miR-27a-3p%20ENSMUSG00000022313&amp;genes=ENSMUSG00000022313&amp;mirnas=mmu-miR-27a-3p&amp;threshold=0)">(/DianaTools/index.php?<br/>r=microT_CDS/results&amp;keywords=mmu-<br/>miR-27a-<br/>3p%20ENSMUSG00000022313&amp;genes=ENSMUSG00000022313&amp;mirnas=mmu-<br/>miR-27a-<br/>3p&amp;threshold=0)</a> |
| Dnajc3 (mmu) ⓘ  | mmu-miR-27a-3p ⓘ |    | 0.852<br><a href="(/DianaTools/index.php?r=microT_CDS/results&amp;keywords=mmu-miR-27a-3p%20ENSMUSG00000022136&amp;genes=ENSMUSG00000022136&amp;mirnas=mmu-miR-27a-3p&amp;threshold=0)">(/DianaTools/index.php?<br/>r=microT_CDS/results&amp;keywords=mmu-<br/>miR-27a-<br/>3p%20ENSMUSG00000022136&amp;genes=ENSMUSG00000022136&amp;mirnas=mmu-<br/>miR-27a-<br/>3p&amp;threshold=0)</a> |
| Slc38a4 (mmu) ⓘ | mmu-miR-27a-3p ⓘ |    | 0.811<br><a href="(/DianaTools/index.php?r=microT_CDS/results&amp;keywords=mmu-miR-27a-3p%20ENSMUSG00000022464&amp;genes=ENSMUSG00000022464&amp;mirnas=mmu-miR-27a-3p&amp;threshold=0)">(/DianaTools/index.php?<br/>r=microT_CDS/results&amp;keywords=mmu-<br/>miR-27a-<br/>3p%20ENSMUSG00000022464&amp;genes=ENSMUSG00000022464&amp;mirnas=mmu-<br/>miR-27a-<br/>3p&amp;threshold=0)</a> |
| Kpna3 (mmu) ⓘ   | mmu-miR-27a-3p ⓘ |    | 0.791<br><a href="(/DianaTools/index.php?r=microT_CDS/results&amp;keywords=mmu-miR-27a-3p%20ENSMUSG00000021929&amp;genes=ENSMUSG00000021929&amp;mirnas=mmu-miR-27a-3p&amp;threshold=0)">(/DianaTools/index.php?<br/>r=microT_CDS/results&amp;keywords=mmu-<br/>miR-27a-<br/>3p%20ENSMUSG00000021929&amp;genes=ENSMUSG00000021929&amp;mirnas=mmu-<br/>miR-27a-<br/>3p&amp;threshold=0)</a> |
| Ndufs4 (mmu) ⓘ  | mmu-miR-27a-3p ⓘ |  | 0.782<br><a href="(/DianaTools/index.php?r=microT_CDS/results&amp;keywords=mmu-miR-27a-3p%20ENSMUSG00000021764&amp;genes=ENSMUSG00000021764&amp;mirnas=mmu-miR-27a-3p&amp;threshold=0)">(/DianaTools/index.php?<br/>r=microT_CDS/results&amp;keywords=mmu-<br/>miR-27a-<br/>3p%20ENSMUSG00000021764&amp;genes=ENSMUSG00000021764&amp;mirnas=mmu-<br/>miR-27a-<br/>3p&amp;threshold=0)</a> |
| Ndufs4 (mmu) ⓘ  | mmu-miR-27a-3p ⓘ |  | 0.782<br><a href="(/DianaTools/index.php?r=microT_CDS/results&amp;keywords=mmu-miR-27a-3p%20ENSMUSG00000021764&amp;genes=ENSMUSG00000021764&amp;mirnas=mmu-miR-27a-3p&amp;threshold=0)">(/DianaTools/index.php?<br/>r=microT_CDS/results&amp;keywords=mmu-<br/>miR-27a-<br/>3p%20ENSMUSG00000021764&amp;genes=ENSMUSG00000021764&amp;mirnas=mmu-<br/>miR-27a-<br/>3p&amp;threshold=0)</a> |
| Spata13 (mmu) ⓘ | mmu-miR-27a-3p ⓘ |  | 0.780<br><a href="(/DianaTools/index.php?r=microT_CDS/results&amp;keywords=mmu-miR-27a-3p%20ENSMUSG00000021990&amp;genes=ENSMUSG00000021990&amp;mirnas=mmu-miR-27a-3p&amp;threshold=0)">(/DianaTools/index.php?<br/>r=microT_CDS/results&amp;keywords=mmu-<br/>miR-27a-<br/>3p%20ENSMUSG00000021990&amp;genes=ENSMUSG00000021990&amp;mirnas=mmu-<br/>miR-27a-<br/>3p&amp;threshold=0)</a> |
| Zfr (mmu) ⓘ     | mmu-miR-27a-3p ⓘ |  | 0.750<br><a href="(/DianaTools/index.php?r=microT_CDS/results&amp;keywords=mmu-miR-27a-3p%20ENSMUSG00000022201&amp;genes=ENSMUSG00000022201&amp;mirnas=mmu-miR-27a-3p&amp;threshold=0)">(/DianaTools/index.php?<br/>r=microT_CDS/results&amp;keywords=mmu-<br/>miR-27a-<br/>3p%20ENSMUSG00000022201&amp;genes=ENSMUSG00000022201&amp;mirnas=mmu-<br/>miR-27a-<br/>3p&amp;threshold=0)</a> |

We have placed cookies on your device to help make this website and the services we offer better. By using this site, you agree to the use of cookies. [Learn more](#) ([\(/DianaTools/index.php?r=site/terms\)]((/DianaTools/index.php?r=site/terms))).

I accept

|                 |                  |                                                                                      |                                                                                                                                                                                                                                                                                                                                                                                           |
|-----------------|------------------|--------------------------------------------------------------------------------------|-------------------------------------------------------------------------------------------------------------------------------------------------------------------------------------------------------------------------------------------------------------------------------------------------------------------------------------------------------------------------------------------|
| Zfr (mmu) ⓘ     | mmu-miR-27a-3p ⓘ |    | 0.750<br><a href="(/DianaTools/index.php?r=microT_CDS/results&amp;keywords=mmu-miR-27a-3p%20ENSMUSG00000022201&amp;genes=ENSMUSG00000022201&amp;mirnas=mmu-miR-27a-3p&amp;threshold=0)">(/DianaTools/index.php?<br/>r=microT_CDS/results&amp;keywords=mmu-<br/>miR-27a-<br/>3p%20ENSMUSG00000022201&amp;genes=ENSMUSG00000022201&amp;mirnas=mmu-<br/>miR-27a-<br/>3p&amp;threshold=0)</a> |
| Dcp1a (mmu) ⓘ   | mmu-miR-27a-3p ⓘ |    | 0.747<br><a href="(/DianaTools/index.php?r=microT_CDS/results&amp;keywords=mmu-miR-27a-3p%20ENSMUSG00000021962&amp;genes=ENSMUSG00000021962&amp;mirnas=mmu-miR-27a-3p&amp;threshold=0)">(/DianaTools/index.php?<br/>r=microT_CDS/results&amp;keywords=mmu-<br/>miR-27a-<br/>3p%20ENSMUSG00000021962&amp;genes=ENSMUSG00000021962&amp;mirnas=mmu-<br/>miR-27a-<br/>3p&amp;threshold=0)</a> |
| Fbxo32 (mmu) ⓘ  | mmu-miR-27a-3p ⓘ |    | 0.727<br><a href="(/DianaTools/index.php?r=microT_CDS/results&amp;keywords=mmu-miR-27a-3p%20ENSMUSG00000022358&amp;genes=ENSMUSG00000022358&amp;mirnas=mmu-miR-27a-3p&amp;threshold=0)">(/DianaTools/index.php?<br/>r=microT_CDS/results&amp;keywords=mmu-<br/>miR-27a-<br/>3p%20ENSMUSG00000022358&amp;genes=ENSMUSG00000022358&amp;mirnas=mmu-<br/>miR-27a-<br/>3p&amp;threshold=0)</a> |
| Ero1l (mmu) ⓘ   | mmu-miR-27a-3p ⓘ |    | 0.703<br><a href="(/DianaTools/index.php?r=microT_CDS/results&amp;keywords=mmu-miR-27a-3p%20ENSMUSG00000021831&amp;genes=ENSMUSG00000021831&amp;mirnas=mmu-miR-27a-3p&amp;threshold=0)">(/DianaTools/index.php?<br/>r=microT_CDS/results&amp;keywords=mmu-<br/>miR-27a-<br/>3p%20ENSMUSG00000021831&amp;genes=ENSMUSG00000021831&amp;mirnas=mmu-<br/>miR-27a-<br/>3p&amp;threshold=0)</a> |
| Pdzd2 (mmu) ⓘ   | mmu-miR-27a-3p ⓘ |    | 0.697<br><a href="(/DianaTools/index.php?r=microT_CDS/results&amp;keywords=mmu-miR-27a-3p%20ENSMUSG00000022197&amp;genes=ENSMUSG00000022197&amp;mirnas=mmu-miR-27a-3p&amp;threshold=0)">(/DianaTools/index.php?<br/>r=microT_CDS/results&amp;keywords=mmu-<br/>miR-27a-<br/>3p%20ENSMUSG00000022197&amp;genes=ENSMUSG00000022197&amp;mirnas=mmu-<br/>miR-27a-<br/>3p&amp;threshold=0)</a> |
| Rasgrf2 (mmu) ⓘ | mmu-miR-27a-3p ⓘ |    | 0.681<br><a href="(/DianaTools/index.php?r=microT_CDS/results&amp;keywords=mmu-miR-27a-3p%20ENSMUSG00000021708&amp;genes=ENSMUSG00000021708&amp;mirnas=mmu-miR-27a-3p&amp;threshold=0)">(/DianaTools/index.php?<br/>r=microT_CDS/results&amp;keywords=mmu-<br/>miR-27a-<br/>3p%20ENSMUSG00000021708&amp;genes=ENSMUSG00000021708&amp;mirnas=mmu-<br/>miR-27a-<br/>3p&amp;threshold=0)</a> |
| Wbp4 (mmu) ⓘ    | mmu-miR-27a-3p ⓘ |    | 0.643<br><a href="(/DianaTools/index.php?r=microT_CDS/results&amp;keywords=mmu-miR-27a-3p%20ENSMUSG00000022023&amp;genes=ENSMUSG00000022023&amp;mirnas=mmu-miR-27a-3p&amp;threshold=0)">(/DianaTools/index.php?<br/>r=microT_CDS/results&amp;keywords=mmu-<br/>miR-27a-<br/>3p%20ENSMUSG00000022023&amp;genes=ENSMUSG00000022023&amp;mirnas=mmu-<br/>miR-27a-<br/>3p&amp;threshold=0)</a> |
| Dpysl2 (mmu) ⓘ  | mmu-miR-27a-3p ⓘ |  | 0.632<br><a href="(/DianaTools/index.php?r=microT_CDS/results&amp;keywords=mmu-miR-27a-3p%20ENSMUSG00000022048&amp;genes=ENSMUSG00000022048&amp;mirnas=mmu-miR-27a-3p&amp;threshold=0)">(/DianaTools/index.php?<br/>r=microT_CDS/results&amp;keywords=mmu-<br/>miR-27a-<br/>3p%20ENSMUSG00000022048&amp;genes=ENSMUSG00000022048&amp;mirnas=mmu-<br/>miR-27a-<br/>3p&amp;threshold=0)</a> |
| Dpysl2 (mmu) ⓘ  | mmu-miR-27a-3p ⓘ |  | 0.632<br><a href="(/DianaTools/index.php?r=microT_CDS/results&amp;keywords=mmu-miR-27a-3p%20ENSMUSG00000022048&amp;genes=ENSMUSG00000022048&amp;mirnas=mmu-miR-27a-3p&amp;threshold=0)">(/DianaTools/index.php?<br/>r=microT_CDS/results&amp;keywords=mmu-<br/>miR-27a-<br/>3p%20ENSMUSG00000022048&amp;genes=ENSMUSG00000022048&amp;mirnas=mmu-<br/>miR-27a-<br/>3p&amp;threshold=0)</a> |
| Serinc5 (mmu) ⓘ | mmu-miR-27a-3p ⓘ |  | 0.615<br><a href="(/DianaTools/index.php?r=microT_CDS/results&amp;keywords=mmu-miR-27a-3p%20ENSMUSG00000021703&amp;genes=ENSMUSG00000021703&amp;mirnas=mmu-miR-27a-3p&amp;threshold=0)">(/DianaTools/index.php?<br/>r=microT_CDS/results&amp;keywords=mmu-<br/>miR-27a-<br/>3p%20ENSMUSG00000021703&amp;genes=ENSMUSG00000021703&amp;mirnas=mmu-<br/>miR-27a-<br/>3p&amp;threshold=0)</a> |
| Rad21 (mmu) ⓘ   | mmu-miR-27a-3p ⓘ |  | 0.612<br><a href="(/DianaTools/index.php?r=microT_CDS/results&amp;keywords=mmu-miR-27a-3p%20ENSMUSG00000022314&amp;genes=ENSMUSG00000022314&amp;mirnas=mmu-miR-27a-3p&amp;threshold=0)">(/DianaTools/index.php?<br/>r=microT_CDS/results&amp;keywords=mmu-<br/>miR-27a-<br/>3p%20ENSMUSG00000022314&amp;genes=ENSMUSG00000022314&amp;mirnas=mmu-<br/>miR-27a-<br/>3p&amp;threshold=0)</a> |

We have placed cookies on your device to help make this website and the services we offer better. By using this site, you agree to the use of cookies. [Learn more]((/DianaTools/index.php?r=site/terms)) ([/DianaTools/index.php?r=site/terms]((/DianaTools/index.php?r=site/terms))).

I accept

|                |                  |                                                                                      |                                                                                                                                                                                                  |
|----------------|------------------|--------------------------------------------------------------------------------------|--------------------------------------------------------------------------------------------------------------------------------------------------------------------------------------------------|
| Plau (mmu) ⓘ   | mmu-miR-27a-3p ⓘ |    | <p><a href="#">0.611 (/DianaTools/index.php?r=miroT_CDS/results&amp;keywords=mmu-miR-27a-3p%20ENSMUSG00000021822&amp;genes=ENSMUSG00000021822&amp;mirnas=mmu-miR-27a-3p&amp;threshold=0)</a></p> |
| Trio (mmu) ⓘ   | mmu-miR-27a-3p ⓘ |    | <p><a href="#">0.603 (/DianaTools/index.php?r=miroT_CDS/results&amp;keywords=mmu-miR-27a-3p%20ENSMUSG00000022263&amp;genes=ENSMUSG00000022263&amp;mirnas=mmu-miR-27a-3p&amp;threshold=0)</a></p> |
| Asap1 (mmu) ⓘ  | mmu-miR-27a-3p ⓘ |    | <p><a href="#">0.586 (/DianaTools/index.php?r=miroT_CDS/results&amp;keywords=mmu-miR-27a-3p%20ENSMUSG00000022377&amp;genes=ENSMUSG00000022377&amp;mirnas=mmu-miR-27a-3p&amp;threshold=0)</a></p> |
| Zmym2 (mmu) ⓘ  | mmu-miR-27a-3p ⓘ |    | <p><a href="#">0.581 (/DianaTools/index.php?r=miroT_CDS/results&amp;keywords=mmu-miR-27a-3p%20ENSMUSG00000021945&amp;genes=ENSMUSG00000021945&amp;mirnas=mmu-miR-27a-3p&amp;threshold=0)</a></p> |
| Slc4a7 (mmu) ⓘ | mmu-miR-27a-3p ⓘ |    | <p><a href="#">0.580 (/DianaTools/index.php?r=miroT_CDS/results&amp;keywords=mmu-miR-27a-3p%20ENSMUSG00000021733&amp;genes=ENSMUSG00000021733&amp;mirnas=mmu-miR-27a-3p&amp;threshold=0)</a></p> |
| Map3k1 (mmu) ⓘ | mmu-miR-27a-3p ⓘ |    | <p><a href="#">0.580 (/DianaTools/index.php?r=miroT_CDS/results&amp;keywords=mmu-miR-27a-3p%20ENSMUSG00000021754&amp;genes=ENSMUSG00000021754&amp;mirnas=mmu-miR-27a-3p&amp;threshold=0)</a></p> |
| Mapk8 (mmu) ⓘ  | mmu-miR-27a-3p ⓘ |    | <p><a href="#">0.578 (/DianaTools/index.php?r=miroT_CDS/results&amp;keywords=mmu-miR-27a-3p%20ENSMUSG00000021936&amp;genes=ENSMUSG00000021936&amp;mirnas=mmu-miR-27a-3p&amp;threshold=0)</a></p> |
| Xrcc6 (mmu) ⓘ  | mmu-miR-27a-3p ⓘ |  | <p><a href="#">0.576 (/DianaTools/index.php?r=miroT_CDS/results&amp;keywords=mmu-miR-27a-3p%20ENSMUSG00000022471&amp;genes=ENSMUSG00000022471&amp;mirnas=mmu-miR-27a-3p&amp;threshold=0)</a></p> |
| Der1 (mmu) ⓘ   | mmu-miR-27a-3p ⓘ |  | <p><a href="#">0.549 (/DianaTools/index.php?r=miroT_CDS/results&amp;keywords=mmu-miR-27a-3p%20ENSMUSG00000022365&amp;genes=ENSMUSG00000022365&amp;mirnas=mmu-miR-27a-3p&amp;threshold=0)</a></p> |
| Fbxl3 (mmu) ⓘ  | mmu-miR-27a-3p ⓘ |  | <p><a href="#">0.544 (/DianaTools/index.php?r=miroT_CDS/results&amp;keywords=mmu-miR-27a-3p%20ENSMUSG00000022124&amp;genes=ENSMUSG00000022124&amp;mirnas=mmu-miR-27a-3p&amp;threshold=0)</a></p> |
| Kat6b (mmu) ⓘ  | mmu-miR-27a-3p ⓘ |  | <p><a href="#">0.542 (/DianaTools/index.php?r=miroT_CDS/results&amp;keywords=mmu-miR-27a-3p%20ENSMUSG00000021767&amp;genes=ENSMUSG00000021767&amp;mirnas=mmu-miR-27a-3p&amp;threshold=0)</a></p> |

We have placed cookies on your device to help make this website and the services we offer better. By using this site, you agree to the use of cookies. [Learn more \(/DianaTools/index.php?r=site/terms\)](#)

I accept

|                       |                  |                                                                                      |                                                                                                                                                                                                                       |
|-----------------------|------------------|--------------------------------------------------------------------------------------|-----------------------------------------------------------------------------------------------------------------------------------------------------------------------------------------------------------------------|
| Arhgef3 (mmu) ⓘ       | mmu-miR-27a-3p ⓘ |    | <p><a href="#">0.541</a><br/> <a href="#">(/DianaTools/index.php?r=miroT_CDS/results&amp;keywords=mmu-miR-27a-3p%20ENSMUSG00000021895&amp;genes=ENSMUSG00000021895&amp;mirnas=mmu-miR-27a-3p&amp;threshold=0)</a></p> |
| Nid2 (mmu) ⓘ          | mmu-miR-27a-3p ⓘ |    | <p><a href="#">0.529</a><br/> <a href="#">(/DianaTools/index.php?r=miroT_CDS/results&amp;keywords=mmu-miR-27a-3p%20ENSMUSG00000021806&amp;genes=ENSMUSG00000021806&amp;mirnas=mmu-miR-27a-3p&amp;threshold=0)</a></p> |
| Tgds (mmu) ⓘ          | mmu-miR-27a-3p ⓘ |    | <p><a href="#">0.519</a><br/> <a href="#">(/DianaTools/index.php?r=miroT_CDS/results&amp;keywords=mmu-miR-27a-3p%20ENSMUSG00000022130&amp;genes=ENSMUSG00000022130&amp;mirnas=mmu-miR-27a-3p&amp;threshold=0)</a></p> |
| 1810013L24Rik (mmu) ⓘ | mmu-miR-27a-3p ⓘ |    | <p><a href="#">0.515</a><br/> <a href="#">(/DianaTools/index.php?r=miroT_CDS/results&amp;keywords=mmu-miR-27a-3p%20ENSMUSG00000022507&amp;genes=ENSMUSG00000022507&amp;mirnas=mmu-miR-27a-3p&amp;threshold=0)</a></p> |
| Mtdh (mmu) ⓘ          | mmu-miR-27a-3p ⓘ |    | <p><a href="#">0.512</a><br/> <a href="#">(/DianaTools/index.php?r=miroT_CDS/results&amp;keywords=mmu-miR-27a-3p%20ENSMUSG00000022255&amp;genes=ENSMUSG00000022255&amp;mirnas=mmu-miR-27a-3p&amp;threshold=0)</a></p> |
| Mtdh (mmu) ⓘ          | mmu-miR-27a-3p ⓘ |    | <p><a href="#">0.512</a><br/> <a href="#">(/DianaTools/index.php?r=miroT_CDS/results&amp;keywords=mmu-miR-27a-3p%20ENSMUSG00000022255&amp;genes=ENSMUSG00000022255&amp;mirnas=mmu-miR-27a-3p&amp;threshold=0)</a></p> |
| Oxct1 (mmu) ⓘ         | mmu-miR-27a-3p ⓘ |    | <p><a href="#">0.507</a><br/> <a href="#">(/DianaTools/index.php?r=miroT_CDS/results&amp;keywords=mmu-miR-27a-3p%20ENSMUSG00000022186&amp;genes=ENSMUSG00000022186&amp;mirnas=mmu-miR-27a-3p&amp;threshold=0)</a></p> |
| Zdhhc20 (mmu) ⓘ       | mmu-miR-27a-3p ⓘ |  | <p><a href="#">0.499</a><br/> <a href="#">(/DianaTools/index.php?r=miroT_CDS/results&amp;keywords=mmu-miR-27a-3p%20ENSMUSG00000021969&amp;genes=ENSMUSG00000021969&amp;mirnas=mmu-miR-27a-3p&amp;threshold=0)</a></p> |
| Zdhhc20 (mmu) ⓘ       | mmu-miR-27a-3p ⓘ |  | <p><a href="#">0.499</a><br/> <a href="#">(/DianaTools/index.php?r=miroT_CDS/results&amp;keywords=mmu-miR-27a-3p%20ENSMUSG00000021969&amp;genes=ENSMUSG00000021969&amp;mirnas=mmu-miR-27a-3p&amp;threshold=0)</a></p> |
| St13 (mmu) ⓘ          | mmu-miR-27a-3p ⓘ |  | <p><a href="#">0.492</a><br/> <a href="#">(/DianaTools/index.php?r=miroT_CDS/results&amp;keywords=mmu-miR-27a-3p%20ENSMUSG00000022403&amp;genes=ENSMUSG00000022403&amp;mirnas=mmu-miR-27a-3p&amp;threshold=0)</a></p> |
| Shcbp1 (mmu) ⓘ        | mmu-miR-27a-3p ⓘ |  | <p><a href="#">0.488</a><br/> <a href="#">(/DianaTools/index.php?r=miroT_CDS/results&amp;keywords=mmu-miR-27a-3p%20ENSMUSG00000022322&amp;genes=ENSMUSG00000022322&amp;mirnas=mmu-miR-27a-3p&amp;threshold=0)</a></p> |

We have placed cookies on your device to help make this website and the services we offer better. By using this site, you agree to the use of cookies. [Learn more](#) ([/DianaTools/index.php?r=site/terms](#)).

I accept

|                 |                  |    |                                                                                                                                                                                  |
|-----------------|------------------|----|----------------------------------------------------------------------------------------------------------------------------------------------------------------------------------|
| Tkt (mmu) ⓘ     | mmu-miR-27a-3p ⓘ | IP | 0.487<br>(/DianaTools/index.php?<br>r=miroT_CDS/results&keywords=mmu-<br>miR-27a-<br>3p%20ENSMUSG00000021957&genes=ENSMUSG00000021957&mirnas=mmu-<br>miR-27a-<br>3p&threshold=0) |
| Fam134b (mmu) ⓘ | mmu-miR-27a-3p ⓘ | IP | 0.478<br>(/DianaTools/index.php?<br>r=miroT_CDS/results&keywords=mmu-<br>miR-27a-<br>3p%20ENSMUSG00000022270&genes=ENSMUSG00000022270&mirnas=mmu-<br>miR-27a-<br>3p&threshold=0) |
| Lcp1 (mmu) ⓘ    | mmu-miR-27a-3p ⓘ | IP | 0.475<br>(/DianaTools/index.php?<br>r=miroT_CDS/results&keywords=mmu-<br>miR-27a-<br>3p%20ENSMUSG00000021998&genes=ENSMUSG00000021998&mirnas=mmu-<br>miR-27a-<br>3p&threshold=0) |
| Syng1 (mmu) ⓘ   | mmu-miR-27a-3p ⓘ | IP | 0.467<br>(/DianaTools/index.php?<br>r=miroT_CDS/results&keywords=mmu-<br>miR-27a-<br>3p%20ENSMUSG00000022415&genes=ENSMUSG00000022415&mirnas=mmu-<br>miR-27a-<br>3p&threshold=0) |
| Nufip1 (mmu) ⓘ  | mmu-miR-27a-3p ⓘ | IP | 0.465<br>(/DianaTools/index.php?<br>r=miroT_CDS/results&keywords=mmu-<br>miR-27a-<br>3p%20ENSMUSG00000022009&genes=ENSMUSG00000022009&mirnas=mmu-<br>miR-27a-<br>3p&threshold=0) |
| Atad2 (mmu) ⓘ   | mmu-miR-27a-3p ⓘ | IP | 0.462<br>(/DianaTools/index.php?<br>r=miroT_CDS/results&keywords=mmu-<br>miR-27a-<br>3p%20ENSMUSG00000022360&genes=ENSMUSG00000022360&mirnas=mmu-<br>miR-27a-<br>3p&threshold=0) |
| C9 (mmu) ⓘ      | mmu-miR-27a-3p ⓘ | IP | -                                                                                                                                                                                |
| Tgm1 (mmu) ⓘ    | mmu-miR-27a-3p ⓘ | IP | -                                                                                                                                                                                |
| Il6st (mmu) ⓘ   | mmu-miR-27a-3p ⓘ | IP | -                                                                                                                                                                                |
| Akap11 (mmu) ⓘ  | mmu-miR-27a-3p ⓘ | IP | -                                                                                                                                                                                |
| Erb2ip (mmu) ⓘ  | mmu-miR-27a-3p ⓘ | IP | -                                                                                                                                                                                |
| Prkcd (mmu) ⓘ   | mmu-miR-27a-3p ⓘ | IP | -                                                                                                                                                                                |
| Hmbx1 (mmu) ⓘ   | mmu-miR-27a-3p ⓘ | IP | -                                                                                                                                                                                |
| Desi1 (mmu) ⓘ   | mmu-miR-27a-3p ⓘ | IP | -                                                                                                                                                                                |
| Acox2 (mmu) ⓘ   | mmu-miR-27a-3p ⓘ | IP | -                                                                                                                                                                                |
| Ppara (mmu) ⓘ   | mmu-miR-27a-3p ⓘ | IP | -                                                                                                                                                                                |
| Vdac2 (mmu) ⓘ   | mmu-miR-27a-3p ⓘ | IP | -                                                                                                                                                                                |
| Emc2 (mmu) ⓘ    | mmu-miR-27a-3p ⓘ | IP | -                                                                                                                                                                                |
| Bmp1 (mmu) ⓘ    | mmu-miR-27a-3p ⓘ | IP | -                                                                                                                                                                                |
| Trim35 (mmu) ⓘ  | mmu-miR-27a-3p ⓘ | IP | -                                                                                                                                                                                |
| Ogdhl (mmu) ⓘ   | mmu-miR-27a-3p ⓘ | IP | -                                                                                                                                                                                |

We have placed cookies on your device to help make this website and the services we offer better. By using this site, you agree to the use of cookies. [Learn more](#) (/DianaTools/index.php?r=site/terms)

I accept

|                       |                  |    |   |
|-----------------------|------------------|----|---|
| Dpys (mmu) ⓘ          | mmu-miR-27a-3p ⓘ | IP | - |
| Slc4a7 (mmu) ⓘ        | mmu-miR-27a-3p ⓘ | IP | - |
| Vcl (mmu) ⓘ           | mmu-miR-27a-3p ⓘ | IP | - |
| Rnf19a (mmu) ⓘ        | mmu-miR-27a-3p ⓘ | IP | - |
| Pde1b (mmu) ⓘ         | mmu-miR-27a-3p ⓘ | IP | - |
| Srebf2 (mmu) ⓘ        | mmu-miR-27a-3p ⓘ | IP | - |
| Extl3 (mmu) ⓘ         | mmu-miR-27a-3p ⓘ | IP | - |
| C6 (mmu) ⓘ            | mmu-miR-27a-3p ⓘ | IP | - |
| Ppp3cb (mmu) ⓘ        | mmu-miR-27a-3p ⓘ | IP | - |
| Zc3h7b (mmu) ⓘ        | mmu-miR-27a-3p ⓘ | IP | - |
| Khdrbs3 (mmu) ⓘ       | mmu-miR-27a-3p ⓘ | IP | - |
| E430025E21Rik (mmu) ⓘ | mmu-miR-27a-3p ⓘ | IP | - |
| Hmbx1 (mmu) ⓘ         | mmu-miR-27a-3p ⓘ | IP | - |
| Pabpn1 (mmu) ⓘ        | mmu-miR-27a-3p ⓘ | IP | - |
| Aco2 (mmu) ⓘ          | mmu-miR-27a-3p ⓘ | IP | - |
| Mapk1ip1l (mmu) ⓘ     | mmu-miR-27a-3p ⓘ | IP | - |
| Mbnl2 (mmu) ⓘ         | mmu-miR-27a-3p ⓘ | IP | - |
| Enox1 (mmu) ⓘ         | mmu-miR-27a-3p ⓘ | IP | - |
| Cct5 (mmu) ⓘ          | mmu-miR-27a-3p ⓘ | IP | - |
| Cct5 (mmu) ⓘ          | mmu-miR-27a-3p ⓘ | IP | - |
| L3mbtl2 (mmu) ⓘ       | mmu-miR-27a-3p ⓘ | IP | - |
| Rgs7bp (mmu) ⓘ        | mmu-miR-27a-3p ⓘ | IP | - |
| Myo10 (mmu) ⓘ         | mmu-miR-27a-3p ⓘ | IP | - |
| Slc38a2 (mmu) ⓘ       | mmu-miR-27a-3p ⓘ | IP | - |
| Haus4 (mmu) ⓘ         | mmu-miR-27a-3p ⓘ | IP | - |
| Ywhaz (mmu) ⓘ         | mmu-miR-27a-3p ⓘ | IP | - |
| Nckap1l (mmu) ⓘ       | mmu-miR-27a-3p ⓘ | IP | - |
| Ripk3 (mmu) ⓘ         | mmu-miR-27a-3p ⓘ | IP | - |
| Runx1 (mmu) ⓘ         | mmu-miR-27a-3p ⓘ | IP | - |

1,000  
 (/DianaTools/index.php?  
 r=microT\_CDS/results&keywords=mmu-  
 miR-27a-  
 3p%20ENSMUSG00000022952&genes=ENSMUSG0000002295  
 miR-27a-  
 3p&threshold=0)

We have placed cookies on your device to help make this website and the services we offer better. By using this site, you agree to the use of cookies. [Learn more \(/DianaTools/index.php?r=site/terms\)](#).

I accept

|                |                  |                                                                                      |                                                                                                                                                                                                                                                                                                                                                                  |
|----------------|------------------|--------------------------------------------------------------------------------------|------------------------------------------------------------------------------------------------------------------------------------------------------------------------------------------------------------------------------------------------------------------------------------------------------------------------------------------------------------------|
| Zbtb20 (mmu) ⓘ | mmu-miR-27a-3p ⓘ |    | 1.000<br><a href="(/DianaTools/index.php?r=microT_CDS/results&amp;keywords=mmu-miR-27a-3p%20ENSMUSG00000022708&amp;genes=ENSMUSG00000022708&amp;mirnas=mmu-miR-27a-3p&amp;threshold=0)">(/DianaTools/index.php?r=microT_CDS/results&amp;keywords=mmu-miR-27a-3p%20ENSMUSG00000022708&amp;genes=ENSMUSG00000022708&amp;mirnas=mmu-miR-27a-3p&amp;threshold=0)</a> |
| Zbtb20 (mmu) ⓘ | mmu-miR-27a-3p ⓘ |    | 1.000<br><a href="(/DianaTools/index.php?r=microT_CDS/results&amp;keywords=mmu-miR-27a-3p%20ENSMUSG00000022708&amp;genes=ENSMUSG00000022708&amp;mirnas=mmu-miR-27a-3p&amp;threshold=0)">(/DianaTools/index.php?r=microT_CDS/results&amp;keywords=mmu-miR-27a-3p%20ENSMUSG00000022708&amp;genes=ENSMUSG00000022708&amp;mirnas=mmu-miR-27a-3p&amp;threshold=0)</a> |
| Tmbim6 (mmu) ⓘ | mmu-miR-27a-3p ⓘ |    | 0.996<br><a href="(/DianaTools/index.php?r=microT_CDS/results&amp;keywords=mmu-miR-27a-3p%20ENSMUSG00000023010&amp;genes=ENSMUSG00000023010&amp;mirnas=mmu-miR-27a-3p&amp;threshold=0)">(/DianaTools/index.php?r=microT_CDS/results&amp;keywords=mmu-miR-27a-3p%20ENSMUSG00000023010&amp;genes=ENSMUSG00000023010&amp;mirnas=mmu-miR-27a-3p&amp;threshold=0)</a> |
| Tmbim6 (mmu) ⓘ | mmu-miR-27a-3p ⓘ |    | 0.996<br><a href="(/DianaTools/index.php?r=microT_CDS/results&amp;keywords=mmu-miR-27a-3p%20ENSMUSG00000023010&amp;genes=ENSMUSG00000023010&amp;mirnas=mmu-miR-27a-3p&amp;threshold=0)">(/DianaTools/index.php?r=microT_CDS/results&amp;keywords=mmu-miR-27a-3p%20ENSMUSG00000023010&amp;genes=ENSMUSG00000023010&amp;mirnas=mmu-miR-27a-3p&amp;threshold=0)</a> |
| Lbh (mmu) ⓘ    | mmu-miR-27a-3p ⓘ |    | 0.975<br><a href="(/DianaTools/index.php?r=microT_CDS/results&amp;keywords=mmu-miR-27a-3p%20ENSMUSG00000024063&amp;genes=ENSMUSG00000024063&amp;mirnas=mmu-miR-27a-3p&amp;threshold=0)">(/DianaTools/index.php?r=microT_CDS/results&amp;keywords=mmu-miR-27a-3p%20ENSMUSG00000024063&amp;genes=ENSMUSG00000024063&amp;mirnas=mmu-miR-27a-3p&amp;threshold=0)</a> |
| Lbh (mmu) ⓘ    | mmu-miR-27a-3p ⓘ |    | 0.975<br><a href="(/DianaTools/index.php?r=microT_CDS/results&amp;keywords=mmu-miR-27a-3p%20ENSMUSG00000024063&amp;genes=ENSMUSG00000024063&amp;mirnas=mmu-miR-27a-3p&amp;threshold=0)">(/DianaTools/index.php?r=microT_CDS/results&amp;keywords=mmu-miR-27a-3p%20ENSMUSG00000024063&amp;genes=ENSMUSG00000024063&amp;mirnas=mmu-miR-27a-3p&amp;threshold=0)</a> |
| Sik1 (mmu) ⓘ   | mmu-miR-27a-3p ⓘ |   | 0.975<br><a href="(/DianaTools/index.php?r=microT_CDS/results&amp;keywords=mmu-miR-27a-3p%20ENSMUSG00000024042&amp;genes=ENSMUSG00000024042&amp;mirnas=mmu-miR-27a-3p&amp;threshold=0)">(/DianaTools/index.php?r=microT_CDS/results&amp;keywords=mmu-miR-27a-3p%20ENSMUSG00000024042&amp;genes=ENSMUSG00000024042&amp;mirnas=mmu-miR-27a-3p&amp;threshold=0)</a> |
| Foxp4 (mmu) ⓘ  | mmu-miR-27a-3p ⓘ |  | 0.966<br><a href="(/DianaTools/index.php?r=microT_CDS/results&amp;keywords=mmu-miR-27a-3p%20ENSMUSG00000023991&amp;genes=ENSMUSG00000023991&amp;mirnas=mmu-miR-27a-3p&amp;threshold=0)">(/DianaTools/index.php?r=microT_CDS/results&amp;keywords=mmu-miR-27a-3p%20ENSMUSG00000023991&amp;genes=ENSMUSG00000023991&amp;mirnas=mmu-miR-27a-3p&amp;threshold=0)</a> |
| Cblb (mmu) ⓘ   | mmu-miR-27a-3p ⓘ |  | 0.921<br><a href="(/DianaTools/index.php?r=microT_CDS/results&amp;keywords=mmu-miR-27a-3p%20ENSMUSG00000022637&amp;genes=ENSMUSG00000022637&amp;mirnas=mmu-miR-27a-3p&amp;threshold=0)">(/DianaTools/index.php?r=microT_CDS/results&amp;keywords=mmu-miR-27a-3p%20ENSMUSG00000022637&amp;genes=ENSMUSG00000022637&amp;mirnas=mmu-miR-27a-3p&amp;threshold=0)</a> |
| Pdpk1 (mmu) ⓘ  | mmu-miR-27a-3p ⓘ |  | 0.919<br><a href="(/DianaTools/index.php?r=microT_CDS/results&amp;keywords=mmu-miR-27a-3p%20ENSMUSG00000024122&amp;genes=ENSMUSG00000024122&amp;mirnas=mmu-miR-27a-3p&amp;threshold=0)">(/DianaTools/index.php?r=microT_CDS/results&amp;keywords=mmu-miR-27a-3p%20ENSMUSG00000024122&amp;genes=ENSMUSG00000024122&amp;mirnas=mmu-miR-27a-3p&amp;threshold=0)</a> |
| Luc7l (mmu) ⓘ  | mmu-miR-27a-3p ⓘ |  | 0.889<br><a href="(/DianaTools/index.php?r=microT_CDS/results&amp;keywords=mmu-miR-27a-3p%20ENSMUSG00000024188&amp;genes=ENSMUSG00000024188&amp;mirnas=mmu-miR-27a-3p&amp;threshold=0)">(/DianaTools/index.php?r=microT_CDS/results&amp;keywords=mmu-miR-27a-3p%20ENSMUSG00000024188&amp;genes=ENSMUSG00000024188&amp;mirnas=mmu-miR-27a-3p&amp;threshold=0)</a> |

We have placed cookies on your device to help make this website and the services we offer better. By using this site, you agree to the use of cookies. [Learn more](#) ([\(/DianaTools/index.php?r=site/terms\)]((/DianaTools/index.php?r=site/terms)))

I accept



|                 |                  |                                                                                      |                                                                                                                                                                                                                        |
|-----------------|------------------|--------------------------------------------------------------------------------------|------------------------------------------------------------------------------------------------------------------------------------------------------------------------------------------------------------------------|
| Luc7l (mmu) ⓘ   | mmu-miR-27a-3p ⓘ |    | <p><a href="#">0.889</a><br/> <a href="#">(/DianaTools/index.php?r=microT_CDS/results&amp;keywords=mmu-miR-27a-3p%20ENSMUSG00000024188&amp;genes=ENSMUSG00000024188&amp;mirnas=mmu-miR-27a-3p&amp;threshold=0)</a></p> |
| Snap29 (mmu) ⓘ  | mmu-miR-27a-3p ⓘ |    | <p><a href="#">0.881</a><br/> <a href="#">(/DianaTools/index.php?r=microT_CDS/results&amp;keywords=mmu-miR-27a-3p%20ENSMUSG00000022765&amp;genes=ENSMUSG00000022765&amp;mirnas=mmu-miR-27a-3p&amp;threshold=0)</a></p> |
| Snap29 (mmu) ⓘ  | mmu-miR-27a-3p ⓘ |    | <p><a href="#">0.881</a><br/> <a href="#">(/DianaTools/index.php?r=microT_CDS/results&amp;keywords=mmu-miR-27a-3p%20ENSMUSG00000022765&amp;genes=ENSMUSG00000022765&amp;mirnas=mmu-miR-27a-3p&amp;threshold=0)</a></p> |
| Man2a1 (mmu) ⓘ  | mmu-miR-27a-3p ⓘ |    | <p><a href="#">0.870</a><br/> <a href="#">(/DianaTools/index.php?r=microT_CDS/results&amp;keywords=mmu-miR-27a-3p%20ENSMUSG00000024085&amp;genes=ENSMUSG00000024085&amp;mirnas=mmu-miR-27a-3p&amp;threshold=0)</a></p> |
| Stk38 (mmu) ⓘ   | mmu-miR-27a-3p ⓘ |    | <p><a href="#">0.862</a><br/> <a href="#">(/DianaTools/index.php?r=microT_CDS/results&amp;keywords=mmu-miR-27a-3p%20ENSMUSG00000024006&amp;genes=ENSMUSG00000024006&amp;mirnas=mmu-miR-27a-3p&amp;threshold=0)</a></p> |
| Atp13a3 (mmu) ⓘ | mmu-miR-27a-3p ⓘ |    | <p><a href="#">0.847</a><br/> <a href="#">(/DianaTools/index.php?r=microT_CDS/results&amp;keywords=mmu-miR-27a-3p%20ENSMUSG00000022533&amp;genes=ENSMUSG00000022533&amp;mirnas=mmu-miR-27a-3p&amp;threshold=0)</a></p> |
| Usp25 (mmu) ⓘ   | mmu-miR-27a-3p ⓘ |   | <p><a href="#">0.828</a><br/> <a href="#">(/DianaTools/index.php?r=microT_CDS/results&amp;keywords=mmu-miR-27a-3p%20ENSMUSG00000022867&amp;genes=ENSMUSG00000022867&amp;mirnas=mmu-miR-27a-3p&amp;threshold=0)</a></p> |
| Lpin2 (mmu) ⓘ   | mmu-miR-27a-3p ⓘ |  | <p><a href="#">0.816</a><br/> <a href="#">(/DianaTools/index.php?r=microT_CDS/results&amp;keywords=mmu-miR-27a-3p%20ENSMUSG00000024052&amp;genes=ENSMUSG00000024052&amp;mirnas=mmu-miR-27a-3p&amp;threshold=0)</a></p> |
| Zfp148 (mmu) ⓘ  | mmu-miR-27a-3p ⓘ |  | <p><a href="#">0.815</a><br/> <a href="#">(/DianaTools/index.php?r=microT_CDS/results&amp;keywords=mmu-miR-27a-3p%20ENSMUSG00000022811&amp;genes=ENSMUSG00000022811&amp;mirnas=mmu-miR-27a-3p&amp;threshold=0)</a></p> |
| Brwd1 (mmu) ⓘ   | mmu-miR-27a-3p ⓘ |  | <p><a href="#">0.812</a><br/> <a href="#">(/DianaTools/index.php?r=microT_CDS/results&amp;keywords=mmu-miR-27a-3p%20ENSMUSG00000022914&amp;genes=ENSMUSG00000022914&amp;mirnas=mmu-miR-27a-3p&amp;threshold=0)</a></p> |
| Larp4 (mmu) ⓘ   | mmu-miR-27a-3p ⓘ |  | <p><a href="#">0.805</a><br/> <a href="#">(/DianaTools/index.php?r=microT_CDS/results&amp;keywords=mmu-miR-27a-3p%20ENSMUSG00000023025&amp;genes=ENSMUSG00000023025&amp;mirnas=mmu-miR-27a-3p&amp;threshold=0)</a></p> |

We have placed cookies on your device to help make this website and the services we offer better. By using this site, you agree to the use of cookies. [Learn more](#) ([/DianaTools/index.php?r=site/terms](#)).

I accept

|                |                  |                                                                                      |                                                                                                                                                                                                                                                                                                                                                                  |
|----------------|------------------|--------------------------------------------------------------------------------------|------------------------------------------------------------------------------------------------------------------------------------------------------------------------------------------------------------------------------------------------------------------------------------------------------------------------------------------------------------------|
| Taf8 (mmu) ⓘ   | mmu-miR-27a-3p ⓘ |    | 0.797<br><a href="(/DianaTools/index.php?r=microT_CDS/results&amp;keywords=mmu-miR-27a-3p%20ENSMUSG00000023980&amp;genes=ENSMUSG00000023980&amp;mirnas=mmu-miR-27a-3p&amp;threshold=0)">(/DianaTools/index.php?r=microT_CDS/results&amp;keywords=mmu-miR-27a-3p%20ENSMUSG00000023980&amp;genes=ENSMUSG00000023980&amp;mirnas=mmu-miR-27a-3p&amp;threshold=0)</a> |
| Fgd4 (mmu) ⓘ   | mmu-miR-27a-3p ⓘ |    | 0.781<br><a href="(/DianaTools/index.php?r=microT_CDS/results&amp;keywords=mmu-miR-27a-3p%20ENSMUSG00000022788&amp;genes=ENSMUSG00000022788&amp;mirnas=mmu-miR-27a-3p&amp;threshold=0)">(/DianaTools/index.php?r=microT_CDS/results&amp;keywords=mmu-miR-27a-3p%20ENSMUSG00000022788&amp;genes=ENSMUSG00000022788&amp;mirnas=mmu-miR-27a-3p&amp;threshold=0)</a> |
| Gpd1 (mmu) ⓘ   | mmu-miR-27a-3p ⓘ |    | 0.738<br><a href="(/DianaTools/index.php?r=microT_CDS/results&amp;keywords=mmu-miR-27a-3p%20ENSMUSG00000023019&amp;genes=ENSMUSG00000023019&amp;mirnas=mmu-miR-27a-3p&amp;threshold=0)">(/DianaTools/index.php?r=microT_CDS/results&amp;keywords=mmu-miR-27a-3p%20ENSMUSG00000023019&amp;genes=ENSMUSG00000023019&amp;mirnas=mmu-miR-27a-3p&amp;threshold=0)</a> |
| Pja2 (mmu) ⓘ   | mmu-miR-27a-3p ⓘ |    | 0.707<br><a href="(/DianaTools/index.php?r=microT_CDS/results&amp;keywords=mmu-miR-27a-3p%20ENSMUSG00000024083&amp;genes=ENSMUSG00000024083&amp;mirnas=mmu-miR-27a-3p&amp;threshold=0)">(/DianaTools/index.php?r=microT_CDS/results&amp;keywords=mmu-miR-27a-3p%20ENSMUSG00000024083&amp;genes=ENSMUSG00000024083&amp;mirnas=mmu-miR-27a-3p&amp;threshold=0)</a> |
| Ehd3 (mmu) ⓘ   | mmu-miR-27a-3p ⓘ |    | 0.688<br><a href="(/DianaTools/index.php?r=microT_CDS/results&amp;keywords=mmu-miR-27a-3p%20ENSMUSG00000024065&amp;genes=ENSMUSG00000024065&amp;mirnas=mmu-miR-27a-3p&amp;threshold=0)">(/DianaTools/index.php?r=microT_CDS/results&amp;keywords=mmu-miR-27a-3p%20ENSMUSG00000024065&amp;genes=ENSMUSG00000024065&amp;mirnas=mmu-miR-27a-3p&amp;threshold=0)</a> |
| Ehd3 (mmu) ⓘ   | mmu-miR-27a-3p ⓘ |    | 0.688<br><a href="(/DianaTools/index.php?r=microT_CDS/results&amp;keywords=mmu-miR-27a-3p%20ENSMUSG00000024065&amp;genes=ENSMUSG00000024065&amp;mirnas=mmu-miR-27a-3p&amp;threshold=0)">(/DianaTools/index.php?r=microT_CDS/results&amp;keywords=mmu-miR-27a-3p%20ENSMUSG00000024065&amp;genes=ENSMUSG00000024065&amp;mirnas=mmu-miR-27a-3p&amp;threshold=0)</a> |
| Pak2 (mmu) ⓘ   | mmu-miR-27a-3p ⓘ |    | 0.674<br><a href="(/DianaTools/index.php?r=microT_CDS/results&amp;keywords=mmu-miR-27a-3p%20ENSMUSG00000022781&amp;genes=ENSMUSG00000022781&amp;mirnas=mmu-miR-27a-3p&amp;threshold=0)">(/DianaTools/index.php?r=microT_CDS/results&amp;keywords=mmu-miR-27a-3p%20ENSMUSG00000022781&amp;genes=ENSMUSG00000022781&amp;mirnas=mmu-miR-27a-3p&amp;threshold=0)</a> |
| Pak2 (mmu) ⓘ   | mmu-miR-27a-3p ⓘ |  | 0.674<br><a href="(/DianaTools/index.php?r=microT_CDS/results&amp;keywords=mmu-miR-27a-3p%20ENSMUSG00000022781&amp;genes=ENSMUSG00000022781&amp;mirnas=mmu-miR-27a-3p&amp;threshold=0)">(/DianaTools/index.php?r=microT_CDS/results&amp;keywords=mmu-miR-27a-3p%20ENSMUSG00000022781&amp;genes=ENSMUSG00000022781&amp;mirnas=mmu-miR-27a-3p&amp;threshold=0)</a> |
| Cd200 (mmu) ⓘ  | mmu-miR-27a-3p ⓘ |  | 0.654<br><a href="(/DianaTools/index.php?r=microT_CDS/results&amp;keywords=mmu-miR-27a-3p%20ENSMUSG00000022661&amp;genes=ENSMUSG00000022661&amp;mirnas=mmu-miR-27a-3p&amp;threshold=0)">(/DianaTools/index.php?r=microT_CDS/results&amp;keywords=mmu-miR-27a-3p%20ENSMUSG00000022661&amp;genes=ENSMUSG00000022661&amp;mirnas=mmu-miR-27a-3p&amp;threshold=0)</a> |
| Agpat4 (mmu) ⓘ | mmu-miR-27a-3p ⓘ |  | 0.646<br><a href="(/DianaTools/index.php?r=microT_CDS/results&amp;keywords=mmu-miR-27a-3p%20ENSMUSG00000023827&amp;genes=ENSMUSG00000023827&amp;mirnas=mmu-miR-27a-3p&amp;threshold=0)">(/DianaTools/index.php?r=microT_CDS/results&amp;keywords=mmu-miR-27a-3p%20ENSMUSG00000023827&amp;genes=ENSMUSG00000023827&amp;mirnas=mmu-miR-27a-3p&amp;threshold=0)</a> |
| Satb1 (mmu) ⓘ  | mmu-miR-27a-3p ⓘ |  | 0.602<br><a href="(/DianaTools/index.php?r=microT_CDS/results&amp;keywords=mmu-miR-27a-3p%20ENSMUSG00000023927&amp;genes=ENSMUSG00000023927&amp;mirnas=mmu-miR-27a-3p&amp;threshold=0)">(/DianaTools/index.php?r=microT_CDS/results&amp;keywords=mmu-miR-27a-3p%20ENSMUSG00000023927&amp;genes=ENSMUSG00000023927&amp;mirnas=mmu-miR-27a-3p&amp;threshold=0)</a> |

We have placed cookies on your device to help make this website and the services we offer better. By using this site, you agree to the use of cookies. [Learn more](#) ([\(/DianaTools/index.php?r=site/terms\)]((/DianaTools/index.php?r=site/terms)))

I accept

|                  |                  |                                                                                      |                                                                                                                                                                                                                                                                                                                                                                                           |
|------------------|------------------|--------------------------------------------------------------------------------------|-------------------------------------------------------------------------------------------------------------------------------------------------------------------------------------------------------------------------------------------------------------------------------------------------------------------------------------------------------------------------------------------|
| Iqcb1 (mmu) ⓘ    | mmu-miR-27a-3p ⓘ |    | <p><a href="#">0.595</a><br/> <a href="(/DianaTools/index.php?r=microT_CDS/results&amp;keywords=mmu-miR-27a-3p%20ENSMUSG00000022837&amp;genes=ENSMUSG00000022837&amp;mirnas=mmu-miR-27a-3p&amp;threshold=0)">(/DianaTools/index.php?r=microT_CDS/results&amp;keywords=mmu-miR-27a-3p%20ENSMUSG00000022837&amp;genes=ENSMUSG00000022837&amp;mirnas=mmu-miR-27a-3p&amp;threshold=0)</a></p> |
| Tnk2 (mmu) ⓘ     | mmu-miR-27a-3p ⓘ |    | <p><a href="#">0.590</a><br/> <a href="(/DianaTools/index.php?r=microT_CDS/results&amp;keywords=mmu-miR-27a-3p%20ENSMUSG00000022791&amp;genes=ENSMUSG00000022791&amp;mirnas=mmu-miR-27a-3p&amp;threshold=0)">(/DianaTools/index.php?r=microT_CDS/results&amp;keywords=mmu-miR-27a-3p%20ENSMUSG00000022791&amp;genes=ENSMUSG00000022791&amp;mirnas=mmu-miR-27a-3p&amp;threshold=0)</a></p> |
| Sgol1 (mmu) ⓘ    | mmu-miR-27a-3p ⓘ |    | <p><a href="#">0.585</a><br/> <a href="(/DianaTools/index.php?r=microT_CDS/results&amp;keywords=mmu-miR-27a-3p%20ENSMUSG00000023940&amp;genes=ENSMUSG00000023940&amp;mirnas=mmu-miR-27a-3p&amp;threshold=0)">(/DianaTools/index.php?r=microT_CDS/results&amp;keywords=mmu-miR-27a-3p%20ENSMUSG00000023940&amp;genes=ENSMUSG00000023940&amp;mirnas=mmu-miR-27a-3p&amp;threshold=0)</a></p> |
| Pros1 (mmu) ⓘ    | mmu-miR-27a-3p ⓘ |    | <p><a href="#">0.572</a><br/> <a href="(/DianaTools/index.php?r=microT_CDS/results&amp;keywords=mmu-miR-27a-3p%20ENSMUSG00000022912&amp;genes=ENSMUSG00000022912&amp;mirnas=mmu-miR-27a-3p&amp;threshold=0)">(/DianaTools/index.php?r=microT_CDS/results&amp;keywords=mmu-miR-27a-3p%20ENSMUSG00000022912&amp;genes=ENSMUSG00000022912&amp;mirnas=mmu-miR-27a-3p&amp;threshold=0)</a></p> |
| Smchd1 (mmu) ⓘ   | mmu-miR-27a-3p ⓘ |    | <p><a href="#">0.569</a><br/> <a href="(/DianaTools/index.php?r=microT_CDS/results&amp;keywords=mmu-miR-27a-3p%20ENSMUSG00000024054&amp;genes=ENSMUSG00000024054&amp;mirnas=mmu-miR-27a-3p&amp;threshold=0)">(/DianaTools/index.php?r=microT_CDS/results&amp;keywords=mmu-miR-27a-3p%20ENSMUSG00000024054&amp;genes=ENSMUSG00000024054&amp;mirnas=mmu-miR-27a-3p&amp;threshold=0)</a></p> |
| Mapk8ip2 (mmu) ⓘ | mmu-miR-27a-3p ⓘ |    | <p><a href="#">0.560</a><br/> <a href="(/DianaTools/index.php?r=microT_CDS/results&amp;keywords=mmu-miR-27a-3p%20ENSMUSG00000022619&amp;genes=ENSMUSG00000022619&amp;mirnas=mmu-miR-27a-3p&amp;threshold=0)">(/DianaTools/index.php?r=microT_CDS/results&amp;keywords=mmu-miR-27a-3p%20ENSMUSG00000022619&amp;genes=ENSMUSG00000022619&amp;mirnas=mmu-miR-27a-3p&amp;threshold=0)</a></p> |
| Cxadr (mmu) ⓘ    | mmu-miR-27a-3p ⓘ |    | <p><a href="#">0.551</a><br/> <a href="(/DianaTools/index.php?r=microT_CDS/results&amp;keywords=mmu-miR-27a-3p%20ENSMUSG00000022865&amp;genes=ENSMUSG00000022865&amp;mirnas=mmu-miR-27a-3p&amp;threshold=0)">(/DianaTools/index.php?r=microT_CDS/results&amp;keywords=mmu-miR-27a-3p%20ENSMUSG00000022865&amp;genes=ENSMUSG00000022865&amp;mirnas=mmu-miR-27a-3p&amp;threshold=0)</a></p> |
| Cldn25 (mmu) ⓘ   | mmu-miR-27a-3p ⓘ |  | <p><a href="#">0.548</a><br/> <a href="(/DianaTools/index.php?r=microT_CDS/results&amp;keywords=mmu-miR-27a-3p%20ENSMUSG00000022744&amp;genes=ENSMUSG00000022744&amp;mirnas=mmu-miR-27a-3p&amp;threshold=0)">(/DianaTools/index.php?r=microT_CDS/results&amp;keywords=mmu-miR-27a-3p%20ENSMUSG00000022744&amp;genes=ENSMUSG00000022744&amp;mirnas=mmu-miR-27a-3p&amp;threshold=0)</a></p> |
| Cldn25 (mmu) ⓘ   | mmu-miR-27a-3p ⓘ |  | <p><a href="#">0.548</a><br/> <a href="(/DianaTools/index.php?r=microT_CDS/results&amp;keywords=mmu-miR-27a-3p%20ENSMUSG00000022744&amp;genes=ENSMUSG00000022744&amp;mirnas=mmu-miR-27a-3p&amp;threshold=0)">(/DianaTools/index.php?r=microT_CDS/results&amp;keywords=mmu-miR-27a-3p%20ENSMUSG00000022744&amp;genes=ENSMUSG00000022744&amp;mirnas=mmu-miR-27a-3p&amp;threshold=0)</a></p> |
| Masp1 (mmu) ⓘ    | mmu-miR-27a-3p ⓘ |  | <p><a href="#">0.543</a><br/> <a href="(/DianaTools/index.php?r=microT_CDS/results&amp;keywords=mmu-miR-27a-3p%20ENSMUSG00000022887&amp;genes=ENSMUSG00000022887&amp;mirnas=mmu-miR-27a-3p&amp;threshold=0)">(/DianaTools/index.php?r=microT_CDS/results&amp;keywords=mmu-miR-27a-3p%20ENSMUSG00000022887&amp;genes=ENSMUSG00000022887&amp;mirnas=mmu-miR-27a-3p&amp;threshold=0)</a></p> |
| Nus1 (mmu) ⓘ     | mmu-miR-27a-3p ⓘ |  | <p><a href="#">0.540</a><br/> <a href="(/DianaTools/index.php?r=microT_CDS/results&amp;keywords=mmu-miR-27a-3p%20ENSMUSG00000023068&amp;genes=ENSMUSG00000023068&amp;mirnas=mmu-miR-27a-3p&amp;threshold=0)">(/DianaTools/index.php?r=microT_CDS/results&amp;keywords=mmu-miR-27a-3p%20ENSMUSG00000023068&amp;genes=ENSMUSG00000023068&amp;mirnas=mmu-miR-27a-3p&amp;threshold=0)</a></p> |

We have placed cookies on your device to help make this website and the services we offer better. By using this site, you agree to the use of cookies. [Learn more](#) ([\(/DianaTools/index.php?r=site/terms\)]((/DianaTools/index.php?r=site/terms))).

I accept

|                 |                  |                                                                                      |                                                                                                                                                                                                                                                                                                                                                                                  |
|-----------------|------------------|--------------------------------------------------------------------------------------|----------------------------------------------------------------------------------------------------------------------------------------------------------------------------------------------------------------------------------------------------------------------------------------------------------------------------------------------------------------------------------|
| Rab12 (mmu) ⓘ   | mmu-miR-27a-3p ⓘ |    | <a href="#">0.530</a><br><a href="(/DianaTools/index.php?r=microT_CDS/results&amp;keywords=mmu-miR-27a-3p%20ENSMUSG00000023460&amp;genes=ENSMUSG00000023460&amp;mirnas=mmu-miR-27a-3p&amp;threshold=0)">(/DianaTools/index.php?r=microT_CDS/results&amp;keywords=mmu-miR-27a-3p%20ENSMUSG00000023460&amp;genes=ENSMUSG00000023460&amp;mirnas=mmu-miR-27a-3p&amp;threshold=0)</a> |
| Mcm4 (mmu) ⓘ    | mmu-miR-27a-3p ⓘ |    | <a href="#">0.522</a><br><a href="(/DianaTools/index.php?r=microT_CDS/results&amp;keywords=mmu-miR-27a-3p%20ENSMUSG00000022673&amp;genes=ENSMUSG00000022673&amp;mirnas=mmu-miR-27a-3p&amp;threshold=0)">(/DianaTools/index.php?r=microT_CDS/results&amp;keywords=mmu-miR-27a-3p%20ENSMUSG00000022673&amp;genes=ENSMUSG00000022673&amp;mirnas=mmu-miR-27a-3p&amp;threshold=0)</a> |
| Tfrc (mmu) ⓘ    | mmu-miR-27a-3p ⓘ |    | <a href="#">0.519</a><br><a href="(/DianaTools/index.php?r=microT_CDS/results&amp;keywords=mmu-miR-27a-3p%20ENSMUSG00000022797&amp;genes=ENSMUSG00000022797&amp;mirnas=mmu-miR-27a-3p&amp;threshold=0)">(/DianaTools/index.php?r=microT_CDS/results&amp;keywords=mmu-miR-27a-3p%20ENSMUSG00000022797&amp;genes=ENSMUSG00000022797&amp;mirnas=mmu-miR-27a-3p&amp;threshold=0)</a> |
| Scn8a (mmu) ⓘ   | mmu-miR-27a-3p ⓘ |    | <a href="#">0.512</a><br><a href="(/DianaTools/index.php?r=microT_CDS/results&amp;keywords=mmu-miR-27a-3p%20ENSMUSG00000023033&amp;genes=ENSMUSG00000023033&amp;mirnas=mmu-miR-27a-3p&amp;threshold=0)">(/DianaTools/index.php?r=microT_CDS/results&amp;keywords=mmu-miR-27a-3p%20ENSMUSG00000023033&amp;genes=ENSMUSG00000023033&amp;mirnas=mmu-miR-27a-3p&amp;threshold=0)</a> |
| Vwa5a (mmu) ⓘ   | mmu-miR-27a-3p ⓘ |    | <a href="#">0.507</a><br><a href="(/DianaTools/index.php?r=microT_CDS/results&amp;keywords=mmu-miR-27a-3p%20ENSMUSG00000023186&amp;genes=ENSMUSG00000023186&amp;mirnas=mmu-miR-27a-3p&amp;threshold=0)">(/DianaTools/index.php?r=microT_CDS/results&amp;keywords=mmu-miR-27a-3p%20ENSMUSG00000023186&amp;genes=ENSMUSG00000023186&amp;mirnas=mmu-miR-27a-3p&amp;threshold=0)</a> |
| Synj2 (mmu) ⓘ   | mmu-miR-27a-3p ⓘ |    | <a href="#">0.492</a><br><a href="(/DianaTools/index.php?r=microT_CDS/results&amp;keywords=mmu-miR-27a-3p%20ENSMUSG00000023805&amp;genes=ENSMUSG00000023805&amp;mirnas=mmu-miR-27a-3p&amp;threshold=0)">(/DianaTools/index.php?r=microT_CDS/results&amp;keywords=mmu-miR-27a-3p%20ENSMUSG00000023805&amp;genes=ENSMUSG00000023805&amp;mirnas=mmu-miR-27a-3p&amp;threshold=0)</a> |
| Chd1 (mmu) ⓘ    | mmu-miR-27a-3p ⓘ |    | <a href="#">0.491</a><br><a href="(/DianaTools/index.php?r=microT_CDS/results&amp;keywords=mmu-miR-27a-3p%20ENSMUSG00000023852&amp;genes=ENSMUSG00000023852&amp;mirnas=mmu-miR-27a-3p&amp;threshold=0)">(/DianaTools/index.php?r=microT_CDS/results&amp;keywords=mmu-miR-27a-3p%20ENSMUSG00000023852&amp;genes=ENSMUSG00000023852&amp;mirnas=mmu-miR-27a-3p&amp;threshold=0)</a> |
| Rhoq (mmu) ⓘ    | mmu-miR-27a-3p ⓘ |  | <a href="#">0.477</a><br><a href="(/DianaTools/index.php?r=microT_CDS/results&amp;keywords=mmu-miR-27a-3p%20ENSMUSG00000024143&amp;genes=ENSMUSG00000024143&amp;mirnas=mmu-miR-27a-3p&amp;threshold=0)">(/DianaTools/index.php?r=microT_CDS/results&amp;keywords=mmu-miR-27a-3p%20ENSMUSG00000024143&amp;genes=ENSMUSG00000024143&amp;mirnas=mmu-miR-27a-3p&amp;threshold=0)</a> |
| Twsg1 (mmu) ⓘ   | mmu-miR-27a-3p ⓘ |  | <a href="#">0.463</a><br><a href="(/DianaTools/index.php?r=microT_CDS/results&amp;keywords=mmu-miR-27a-3p%20ENSMUSG00000024098&amp;genes=ENSMUSG00000024098&amp;mirnas=mmu-miR-27a-3p&amp;threshold=0)">(/DianaTools/index.php?r=microT_CDS/results&amp;keywords=mmu-miR-27a-3p%20ENSMUSG00000024098&amp;genes=ENSMUSG00000024098&amp;mirnas=mmu-miR-27a-3p&amp;threshold=0)</a> |
| Cdkn1a (mmu) ⓘ  | mmu-miR-27a-3p ⓘ |  | <a href="#">0.460</a><br><a href="(/DianaTools/index.php?r=microT_CDS/results&amp;keywords=mmu-miR-27a-3p%20ENSMUSG00000023067&amp;genes=ENSMUSG00000023067&amp;mirnas=mmu-miR-27a-3p&amp;threshold=0)">(/DianaTools/index.php?r=microT_CDS/results&amp;keywords=mmu-miR-27a-3p%20ENSMUSG00000023067&amp;genes=ENSMUSG00000023067&amp;mirnas=mmu-miR-27a-3p&amp;threshold=0)</a> |
| Slc35a5 (mmu) ⓘ | mmu-miR-27a-3p ⓘ |  | <a href="#">0.451</a><br><a href="(/DianaTools/index.php?r=microT_CDS/results&amp;keywords=mmu-miR-27a-3p%20ENSMUSG00000022664&amp;genes=ENSMUSG00000022664&amp;mirnas=mmu-miR-27a-3p&amp;threshold=0)">(/DianaTools/index.php?r=microT_CDS/results&amp;keywords=mmu-miR-27a-3p%20ENSMUSG00000022664&amp;genes=ENSMUSG00000022664&amp;mirnas=mmu-miR-27a-3p&amp;threshold=0)</a> |

We have placed cookies on your device to help make this website and the services we offer better. By using this site, you agree to the use of cookies. [Learn more](#) ([/DianaTools/index.php?r=site/terms]((/DianaTools/index.php?r=site/terms))).

I accept

|                  |                  |       |   |
|------------------|------------------|-------|---|
| Birc6 (mmu) ⓘ    | mmu-miR-27a-3p ⓘ | IP    | - |
| Mrpl28 (mmu) ⓘ   | mmu-miR-27a-3p ⓘ | IP    | - |
| Hsp90ab1 (mmu) ⓘ | mmu-miR-27a-3p ⓘ | IP    | - |
| Cers5 (mmu) ⓘ    | mmu-miR-27a-3p ⓘ | IP    | - |
| Maf1 (mmu) ⓘ     | mmu-miR-27a-3p ⓘ | IP    | - |
| Abca3 (mmu) ⓘ    | mmu-miR-27a-3p ⓘ | IP    | - |
| Gtpbp2 (mmu) ⓘ   | mmu-miR-27a-3p ⓘ | IP    | - |
| Pde10a (mmu) ⓘ   | mmu-miR-27a-3p ⓘ | IP    | - |
| Pcdhga12 (mmu) ⓘ | mmu-miR-27a-3p ⓘ | IP    | - |
| Ly6e (mmu) ⓘ     | mmu-miR-27a-3p ⓘ | IP    | - |
| Serpind1 (mmu) ⓘ | mmu-miR-27a-3p ⓘ | IP    | - |
| Hrg (mmu) ⓘ      | mmu-miR-27a-3p ⓘ | IP    | - |
| Igsf11 (mmu) ⓘ   | mmu-miR-27a-3p ⓘ | IP    | - |
| Arhgap31 (mmu) ⓘ | mmu-miR-27a-3p ⓘ | IP    | - |
| Glyr1 (mmu) ⓘ    | mmu-miR-27a-3p ⓘ | IP    | - |
| Nrxn1 (mmu) ⓘ    | mmu-miR-27a-3p ⓘ | IP    | - |
| Runx1 (mmu) ⓘ    | mmu-miR-27a-3p ⓘ | RA WB | - |
| Ehhadh (mmu) ⓘ   | mmu-miR-27a-3p ⓘ | IP    | - |
| Tnfrsf21 (mmu) ⓘ | mmu-miR-27a-3p ⓘ | IP    | - |
| Cox14 (mmu) ⓘ    | mmu-miR-27a-3p ⓘ | IP    | - |
| Naa50 (mmu) ⓘ    | mmu-miR-27a-3p ⓘ | IP    | - |
| Strn (mmu) ⓘ     | mmu-miR-27a-3p ⓘ | IP    | - |
| Dopey2 (mmu) ⓘ   | mmu-miR-27a-3p ⓘ | IP    | - |
| Lnpep (mmu) ⓘ    | mmu-miR-27a-3p ⓘ | IP    | - |
| Lnpep (mmu) ⓘ    | mmu-miR-27a-3p ⓘ | IP    | - |
| Cxadr (mmu) ⓘ    | mmu-miR-27a-3p ⓘ | IP    | - |
| Sympk (mmu) ⓘ    | mmu-miR-27a-3p ⓘ | IP    | - |
| Calcoco1 (mmu) ⓘ | mmu-miR-27a-3p ⓘ | IP    | - |
| Zbtb11 (mmu) ⓘ   | mmu-miR-27a-3p ⓘ | IP    | - |
| Xdh (mmu) ⓘ      | mmu-miR-27a-3p ⓘ | IP    | - |
| Synj1 (mmu) ⓘ    | mmu-miR-27a-3p ⓘ | IP    | - |
| Smarcd1 (mmu) ⓘ  | mmu-miR-27a-3p ⓘ | IP    | - |

We have placed cookies on your device to help make this website and the services we offer better. By using this site, you agree to the use of cookies. [Learn more \(/DianaTools/index.php?r=site/terms\)](/DianaTools/index.php?r=site/terms).

I accept

|                 |                  |    |                                                                                                                                                                                              |
|-----------------|------------------|----|----------------------------------------------------------------------------------------------------------------------------------------------------------------------------------------------|
| Nfya (mmu) ⓘ    | mmu-miR-27a-3p ⓘ | IP | -                                                                                                                                                                                            |
| Mrps23 (mmu) ⓘ  | mmu-miR-27a-3p ⓘ | IP | -                                                                                                                                                                                            |
| Usp25 (mmu) ⓘ   | mmu-miR-27a-3p ⓘ | IP | -                                                                                                                                                                                            |
| Dyrk1a (mmu) ⓘ  | mmu-miR-27a-3p ⓘ | IP | -                                                                                                                                                                                            |
| Cep89 (mmu) ⓘ   | mmu-miR-27a-3p ⓘ | IP | -                                                                                                                                                                                            |
| Zfp148 (mmu) ⓘ  | mmu-miR-27a-3p ⓘ | IP | -                                                                                                                                                                                            |
| Mrpl28 (mmu) ⓘ  | mmu-miR-27a-3p ⓘ | IP | -                                                                                                                                                                                            |
| Fstl1 (mmu) ⓘ   | mmu-miR-27a-3p ⓘ | IP | -                                                                                                                                                                                            |
| Tbc1d5 (mmu) ⓘ  | mmu-miR-27a-3p ⓘ | IP | -                                                                                                                                                                                            |
| Tomm70a (mmu) ⓘ | mmu-miR-27a-3p ⓘ | IP | -                                                                                                                                                                                            |
| Axin1 (mmu) ⓘ   | mmu-miR-27a-3p ⓘ | IP | -                                                                                                                                                                                            |
| Cyc1 (mmu) ⓘ    | mmu-miR-27a-3p ⓘ | IP | -                                                                                                                                                                                            |
| Mal2 (mmu) ⓘ    | mmu-miR-27a-3p ⓘ | IP | 0.985<br><a href="#">(/DianaTools/index.php?r=miroT_CDS/results&amp;keywords=mmu-miR-27a-3p%20ENSMUSG00000024479&amp;genes=ENSMUSG00000024479&amp;mirnas=mmu-miR-27a-3p&amp;threshold=0)</a> |
| Dcp2 (mmu) ⓘ    | mmu-miR-27a-3p ⓘ | IP | 0.948<br><a href="#">(/DianaTools/index.php?r=miroT_CDS/results&amp;keywords=mmu-miR-27a-3p%20ENSMUSG00000024472&amp;genes=ENSMUSG00000024472&amp;mirnas=mmu-miR-27a-3p&amp;threshold=0)</a> |
| Sos1 (mmu) ⓘ    | mmu-miR-27a-3p ⓘ | IP | 0.909<br><a href="#">(/DianaTools/index.php?r=miroT_CDS/results&amp;keywords=mmu-miR-27a-3p%20ENSMUSG00000024241&amp;genes=ENSMUSG00000024241&amp;mirnas=mmu-miR-27a-3p&amp;threshold=0)</a> |
| Sos1 (mmu) ⓘ    | mmu-miR-27a-3p ⓘ | IP | 0.909<br><a href="#">(/DianaTools/index.php?r=miroT_CDS/results&amp;keywords=mmu-miR-27a-3p%20ENSMUSG00000024241&amp;genes=ENSMUSG00000024241&amp;mirnas=mmu-miR-27a-3p&amp;threshold=0)</a> |
| Vegfb (mmu) ⓘ   | mmu-miR-27a-3p ⓘ | IP | 0.825<br><a href="#">(/DianaTools/index.php?r=miroT_CDS/results&amp;keywords=mmu-miR-27a-3p%20ENSMUSG00000024962&amp;genes=ENSMUSG00000024962&amp;mirnas=mmu-miR-27a-3p&amp;threshold=0)</a> |
| Fasn (mmu) ⓘ    | mmu-miR-27a-3p ⓘ | IP | 0.806<br><a href="#">(/DianaTools/index.php?r=miroT_CDS/results&amp;keywords=mmu-miR-27a-3p%20ENSMUSG00000025153&amp;genes=ENSMUSG00000025153&amp;mirnas=mmu-miR-27a-3p&amp;threshold=0)</a> |
| Map3k2 (mmu) ⓘ  | mmu-miR-27a-3p ⓘ | IP | 0.766<br><a href="#">(/DianaTools/index.php?r=miroT_CDS/results&amp;keywords=mmu-miR-27a-3p%20ENSMUSG00000024383&amp;genes=ENSMUSG00000024383&amp;mirnas=mmu-miR-27a-3p&amp;threshold=0)</a> |

We have placed cookies on your device to help make this website and the services we offer better. By using this site, you agree to the use of cookies. [Learn more](#) ([/DianaTools/index.php?r=site/terms](#)).

I accept

|                |                  |                                                                                      |                                                                                                                                                                                                                        |
|----------------|------------------|--------------------------------------------------------------------------------------|------------------------------------------------------------------------------------------------------------------------------------------------------------------------------------------------------------------------|
| Map4k3 (mmu) ⓘ | mmu-miR-27a-3p ⓘ |    | <p><a href="#">0.740</a><br/> <a href="#">(/DianaTools/index.php?r=microT_CDS/results&amp;keywords=mmu-miR-27a-3p%20ENSMUSG00000024242&amp;genes=ENSMUSG00000024242&amp;mirnas=mmu-miR-27a-3p&amp;threshold=0)</a></p> |
| Afg3l2 (mmu) ⓘ | mmu-miR-27a-3p ⓘ |    | <p><a href="#">0.731</a><br/> <a href="#">(/DianaTools/index.php?r=microT_CDS/results&amp;keywords=mmu-miR-27a-3p%20ENSMUSG00000024527&amp;genes=ENSMUSG00000024527&amp;mirnas=mmu-miR-27a-3p&amp;threshold=0)</a></p> |
| Iws1 (mmu) ⓘ   | mmu-miR-27a-3p ⓘ |    | <p><a href="#">0.717</a><br/> <a href="#">(/DianaTools/index.php?r=microT_CDS/results&amp;keywords=mmu-miR-27a-3p%20ENSMUSG00000024384&amp;genes=ENSMUSG00000024384&amp;mirnas=mmu-miR-27a-3p&amp;threshold=0)</a></p> |
| Scd2 (mmu) ⓘ   | mmu-miR-27a-3p ⓘ |    | <p><a href="#">0.713</a><br/> <a href="#">(/DianaTools/index.php?r=microT_CDS/results&amp;keywords=mmu-miR-27a-3p%20ENSMUSG00000025203&amp;genes=ENSMUSG00000025203&amp;mirnas=mmu-miR-27a-3p&amp;threshold=0)</a></p> |
| Scd2 (mmu) ⓘ   | mmu-miR-27a-3p ⓘ |    | <p><a href="#">0.713</a><br/> <a href="#">(/DianaTools/index.php?r=microT_CDS/results&amp;keywords=mmu-miR-27a-3p%20ENSMUSG00000025203&amp;genes=ENSMUSG00000025203&amp;mirnas=mmu-miR-27a-3p&amp;threshold=0)</a></p> |
| Tmem2 (mmu) ⓘ  | mmu-miR-27a-3p ⓘ |    | <p><a href="#">0.698</a><br/> <a href="#">(/DianaTools/index.php?r=microT_CDS/results&amp;keywords=mmu-miR-27a-3p%20ENSMUSG00000024754&amp;genes=ENSMUSG00000024754&amp;mirnas=mmu-miR-27a-3p&amp;threshold=0)</a></p> |
| Arlh1 (mmu) ⓘ  | mmu-miR-27a-3p ⓘ |    | <p><a href="#">0.678</a><br/> <a href="#">(/DianaTools/index.php?r=microT_CDS/results&amp;keywords=mmu-miR-27a-3p%20ENSMUSG00000025234&amp;genes=ENSMUSG00000025234&amp;mirnas=mmu-miR-27a-3p&amp;threshold=0)</a></p> |
| Agap2 (mmu) ⓘ  | mmu-miR-27a-3p ⓘ |  | <p><a href="#">0.669</a><br/> <a href="#">(/DianaTools/index.php?r=microT_CDS/results&amp;keywords=mmu-miR-27a-3p%20ENSMUSG00000025422&amp;genes=ENSMUSG00000025422&amp;mirnas=mmu-miR-27a-3p&amp;threshold=0)</a></p> |
| Tle4 (mmu) ⓘ   | mmu-miR-27a-3p ⓘ |  | <p><a href="#">0.660</a><br/> <a href="#">(/DianaTools/index.php?r=microT_CDS/results&amp;keywords=mmu-miR-27a-3p%20ENSMUSG00000024642&amp;genes=ENSMUSG00000024642&amp;mirnas=mmu-miR-27a-3p&amp;threshold=0)</a></p> |
| Lmnb1 (mmu) ⓘ  | mmu-miR-27a-3p ⓘ |  | <p><a href="#">0.657</a><br/> <a href="#">(/DianaTools/index.php?r=microT_CDS/results&amp;keywords=mmu-miR-27a-3p%20ENSMUSG00000024590&amp;genes=ENSMUSG00000024590&amp;mirnas=mmu-miR-27a-3p&amp;threshold=0)</a></p> |
| Impact (mmu) ⓘ | mmu-miR-27a-3p ⓘ |  | <p><a href="#">0.648</a><br/> <a href="#">(/DianaTools/index.php?r=microT_CDS/results&amp;keywords=mmu-miR-27a-3p%20ENSMUSG00000024423&amp;genes=ENSMUSG00000024423&amp;mirnas=mmu-miR-27a-3p&amp;threshold=0)</a></p> |

We have placed cookies on your device to help make this website and the services we offer better. By using this site, you agree to the use of cookies. [Learn more](#) ([/DianaTools/index.php?r=site/terms](#)).

I accept

|                 |                  |                                                                                      |                                                                                                                                                                                                                       |
|-----------------|------------------|--------------------------------------------------------------------------------------|-----------------------------------------------------------------------------------------------------------------------------------------------------------------------------------------------------------------------|
| Stard4 (mmu) ⓘ  | mmu-miR-27a-3p ⓘ |    | <p><a href="#">0.635</a><br/> <a href="#">(/DianaTools/index.php?r=miroT_CDS/results&amp;keywords=mmu-miR-27a-3p%20ENSMUSG00000024378&amp;genes=ENSMUSG00000024378&amp;mirnas=mmu-miR-27a-3p&amp;threshold=0)</a></p> |
| Tnrc6c (mmu) ⓘ  | mmu-miR-27a-3p ⓘ |    | <p><a href="#">0.632</a><br/> <a href="#">(/DianaTools/index.php?r=miroT_CDS/results&amp;keywords=mmu-miR-27a-3p%20ENSMUSG00000025571&amp;genes=ENSMUSG00000025571&amp;mirnas=mmu-miR-27a-3p&amp;threshold=0)</a></p> |
| Tnrc6c (mmu) ⓘ  | mmu-miR-27a-3p ⓘ |    | <p><a href="#">0.632</a><br/> <a href="#">(/DianaTools/index.php?r=miroT_CDS/results&amp;keywords=mmu-miR-27a-3p%20ENSMUSG00000025571&amp;genes=ENSMUSG00000025571&amp;mirnas=mmu-miR-27a-3p&amp;threshold=0)</a></p> |
| Zfp91 (mmu) ⓘ   | mmu-miR-27a-3p ⓘ |    | <p><a href="#">0.612</a><br/> <a href="#">(/DianaTools/index.php?r=miroT_CDS/results&amp;keywords=mmu-miR-27a-3p%20ENSMUSG00000024695&amp;genes=ENSMUSG00000024695&amp;mirnas=mmu-miR-27a-3p&amp;threshold=0)</a></p> |
| Gpam (mmu) ⓘ    | mmu-miR-27a-3p ⓘ |    | <p><a href="#">0.608</a><br/> <a href="#">(/DianaTools/index.php?r=miroT_CDS/results&amp;keywords=mmu-miR-27a-3p%20ENSMUSG00000024978&amp;genes=ENSMUSG00000024978&amp;mirnas=mmu-miR-27a-3p&amp;threshold=0)</a></p> |
| Gpam (mmu) ⓘ    | mmu-miR-27a-3p ⓘ |    | <p><a href="#">0.608</a><br/> <a href="#">(/DianaTools/index.php?r=miroT_CDS/results&amp;keywords=mmu-miR-27a-3p%20ENSMUSG00000024978&amp;genes=ENSMUSG00000024978&amp;mirnas=mmu-miR-27a-3p&amp;threshold=0)</a></p> |
| Tm9sf3 (mmu) ⓘ  | mmu-miR-27a-3p ⓘ |    | <p><a href="#">0.589</a><br/> <a href="#">(/DianaTools/index.php?r=miroT_CDS/results&amp;keywords=mmu-miR-27a-3p%20ENSMUSG00000025016&amp;genes=ENSMUSG00000025016&amp;mirnas=mmu-miR-27a-3p&amp;threshold=0)</a></p> |
| Pmaip1 (mmu) ⓘ  | mmu-miR-27a-3p ⓘ |  | <p><a href="#">0.588</a><br/> <a href="#">(/DianaTools/index.php?r=miroT_CDS/results&amp;keywords=mmu-miR-27a-3p%20ENSMUSG00000024521&amp;genes=ENSMUSG00000024521&amp;mirnas=mmu-miR-27a-3p&amp;threshold=0)</a></p> |
| Cbx2 (mmu) ⓘ    | mmu-miR-27a-3p ⓘ |  | <p><a href="#">0.557</a><br/> <a href="#">(/DianaTools/index.php?r=miroT_CDS/results&amp;keywords=mmu-miR-27a-3p%20ENSMUSG00000025577&amp;genes=ENSMUSG00000025577&amp;mirnas=mmu-miR-27a-3p&amp;threshold=0)</a></p> |
| Cdh9 (mmu) ⓘ    | mmu-miR-27a-3p ⓘ |  | <p><a href="#">0.557</a><br/> <a href="#">(/DianaTools/index.php?r=miroT_CDS/results&amp;keywords=mmu-miR-27a-3p%20ENSMUSG00000025370&amp;genes=ENSMUSG00000025370&amp;mirnas=mmu-miR-27a-3p&amp;threshold=0)</a></p> |
| Csnk1a1 (mmu) ⓘ | mmu-miR-27a-3p ⓘ |  | <p><a href="#">0.555</a><br/> <a href="#">(/DianaTools/index.php?r=miroT_CDS/results&amp;keywords=mmu-miR-27a-3p%20ENSMUSG00000024576&amp;genes=ENSMUSG00000024576&amp;mirnas=mmu-miR-27a-3p&amp;threshold=0)</a></p> |

We have placed cookies on your device to help make this website and the services we offer better. By using this site, you agree to the use of cookies. [Learn more](#) ([/DianaTools/index.php?r=site/terms](#)).

I accept



|                |                  |                                                                                      |                                                                                                                                                                                                                                                                                                                                                                  |
|----------------|------------------|--------------------------------------------------------------------------------------|------------------------------------------------------------------------------------------------------------------------------------------------------------------------------------------------------------------------------------------------------------------------------------------------------------------------------------------------------------------|
| Flnb (mmu) ⓘ   | mmu-miR-27a-3p ⓘ |    | 0.555<br><a href="(/DianaTools/index.php?r=microT_CDS/results&amp;keywords=mmu-miR-27a-3p%20ENSMUSG00000025278&amp;genes=ENSMUSG00000025278&amp;mirnas=mmu-miR-27a-3p&amp;threshold=0)">(/DianaTools/index.php?r=microT_CDS/results&amp;keywords=mmu-miR-27a-3p%20ENSMUSG00000025278&amp;genes=ENSMUSG00000025278&amp;mirnas=mmu-miR-27a-3p&amp;threshold=0)</a> |
| Ostf1 (mmu) ⓘ  | mmu-miR-27a-3p ⓘ |    | 0.551<br><a href="(/DianaTools/index.php?r=microT_CDS/results&amp;keywords=mmu-miR-27a-3p%20ENSMUSG00000024725&amp;genes=ENSMUSG00000024725&amp;mirnas=mmu-miR-27a-3p&amp;threshold=0)">(/DianaTools/index.php?r=microT_CDS/results&amp;keywords=mmu-miR-27a-3p%20ENSMUSG00000024725&amp;genes=ENSMUSG00000024725&amp;mirnas=mmu-miR-27a-3p&amp;threshold=0)</a> |
| Zfp397 (mmu) ⓘ | mmu-miR-27a-3p ⓘ |    | 0.547<br><a href="(/DianaTools/index.php?r=microT_CDS/results&amp;keywords=mmu-miR-27a-3p%20ENSMUSG00000024276&amp;genes=ENSMUSG00000024276&amp;mirnas=mmu-miR-27a-3p&amp;threshold=0)">(/DianaTools/index.php?r=microT_CDS/results&amp;keywords=mmu-miR-27a-3p%20ENSMUSG00000024276&amp;genes=ENSMUSG00000024276&amp;mirnas=mmu-miR-27a-3p&amp;threshold=0)</a> |
| Npc1 (mmu) ⓘ   | mmu-miR-27a-3p ⓘ |    | 0.526<br><a href="(/DianaTools/index.php?r=microT_CDS/results&amp;keywords=mmu-miR-27a-3p%20ENSMUSG00000024413&amp;genes=ENSMUSG00000024413&amp;mirnas=mmu-miR-27a-3p&amp;threshold=0)">(/DianaTools/index.php?r=microT_CDS/results&amp;keywords=mmu-miR-27a-3p%20ENSMUSG00000024413&amp;genes=ENSMUSG00000024413&amp;mirnas=mmu-miR-27a-3p&amp;threshold=0)</a> |
| Hspa9 (mmu) ⓘ  | mmu-miR-27a-3p ⓘ |    | 0.521<br><a href="(/DianaTools/index.php?r=microT_CDS/results&amp;keywords=mmu-miR-27a-3p%20ENSMUSG00000024359&amp;genes=ENSMUSG00000024359&amp;mirnas=mmu-miR-27a-3p&amp;threshold=0)">(/DianaTools/index.php?r=microT_CDS/results&amp;keywords=mmu-miR-27a-3p%20ENSMUSG00000024359&amp;genes=ENSMUSG00000024359&amp;mirnas=mmu-miR-27a-3p&amp;threshold=0)</a> |
| Prdx3 (mmu) ⓘ  | mmu-miR-27a-3p ⓘ |    | 0.520<br><a href="(/DianaTools/index.php?r=microT_CDS/results&amp;keywords=mmu-miR-27a-3p%20ENSMUSG00000024997&amp;genes=ENSMUSG00000024997&amp;mirnas=mmu-miR-27a-3p&amp;threshold=0)">(/DianaTools/index.php?r=microT_CDS/results&amp;keywords=mmu-miR-27a-3p%20ENSMUSG00000024997&amp;genes=ENSMUSG00000024997&amp;mirnas=mmu-miR-27a-3p&amp;threshold=0)</a> |
| Tnks2 (mmu) ⓘ  | mmu-miR-27a-3p ⓘ |    | 0.519<br><a href="(/DianaTools/index.php?r=microT_CDS/results&amp;keywords=mmu-miR-27a-3p%20ENSMUSG00000024811&amp;genes=ENSMUSG00000024811&amp;mirnas=mmu-miR-27a-3p&amp;threshold=0)">(/DianaTools/index.php?r=microT_CDS/results&amp;keywords=mmu-miR-27a-3p%20ENSMUSG00000024811&amp;genes=ENSMUSG00000024811&amp;mirnas=mmu-miR-27a-3p&amp;threshold=0)</a> |
| Tnks2 (mmu) ⓘ  | mmu-miR-27a-3p ⓘ |  | 0.519<br><a href="(/DianaTools/index.php?r=microT_CDS/results&amp;keywords=mmu-miR-27a-3p%20ENSMUSG00000024811&amp;genes=ENSMUSG00000024811&amp;mirnas=mmu-miR-27a-3p&amp;threshold=0)">(/DianaTools/index.php?r=microT_CDS/results&amp;keywords=mmu-miR-27a-3p%20ENSMUSG00000024811&amp;genes=ENSMUSG00000024811&amp;mirnas=mmu-miR-27a-3p&amp;threshold=0)</a> |
| Plin3 (mmu) ⓘ  | mmu-miR-27a-3p ⓘ |  | 0.519<br><a href="(/DianaTools/index.php?r=microT_CDS/results&amp;keywords=mmu-miR-27a-3p%20ENSMUSG00000024197&amp;genes=ENSMUSG00000024197&amp;mirnas=mmu-miR-27a-3p&amp;threshold=0)">(/DianaTools/index.php?r=microT_CDS/results&amp;keywords=mmu-miR-27a-3p%20ENSMUSG00000024197&amp;genes=ENSMUSG00000024197&amp;mirnas=mmu-miR-27a-3p&amp;threshold=0)</a> |
| Lpxn (mmu) ⓘ   | mmu-miR-27a-3p ⓘ |  | 0.509<br><a href="(/DianaTools/index.php?r=microT_CDS/results&amp;keywords=mmu-miR-27a-3p%20ENSMUSG00000024696&amp;genes=ENSMUSG00000024696&amp;mirnas=mmu-miR-27a-3p&amp;threshold=0)">(/DianaTools/index.php?r=microT_CDS/results&amp;keywords=mmu-miR-27a-3p%20ENSMUSG00000024696&amp;genes=ENSMUSG00000024696&amp;mirnas=mmu-miR-27a-3p&amp;threshold=0)</a> |
| Fycy1 (mmu) ⓘ  | mmu-miR-27a-3p ⓘ |  | 0.508<br><a href="(/DianaTools/index.php?r=microT_CDS/results&amp;keywords=mmu-miR-27a-3p%20ENSMUSG00000025241&amp;genes=ENSMUSG00000025241&amp;mirnas=mmu-miR-27a-3p&amp;threshold=0)">(/DianaTools/index.php?r=microT_CDS/results&amp;keywords=mmu-miR-27a-3p%20ENSMUSG00000025241&amp;genes=ENSMUSG00000025241&amp;mirnas=mmu-miR-27a-3p&amp;threshold=0)</a> |

We have placed cookies on your device to help make this website and the services we offer better. By using this site, you agree to the use of cookies. [Learn more]((/DianaTools/index.php?r=site/terms)) ([/DianaTools/index.php?r=site/terms]((/DianaTools/index.php?r=site/terms))).

I accept

|                 |                  |                                                                                      |                                                                                                                                                                                  |
|-----------------|------------------|--------------------------------------------------------------------------------------|----------------------------------------------------------------------------------------------------------------------------------------------------------------------------------|
| Jak2 (mmu) ⓘ    | mmu-miR-27a-3p ⓘ |    | 0.507<br>(/DianaTools/index.php?<br>r=miroT_CDS/results&keywords=mmu-<br>miR-27a-<br>3p%20ENSMUSG00000024789&genes=ENSMUSG00000024789&mirnas=mmu-<br>miR-27a-<br>3p&threshold=0) |
| Zfp521 (mmu) ⓘ  | mmu-miR-27a-3p ⓘ |    | 0.502<br>(/DianaTools/index.php?<br>r=miroT_CDS/results&keywords=mmu-<br>miR-27a-<br>3p%20ENSMUSG00000024420&genes=ENSMUSG00000024420&mirnas=mmu-<br>miR-27a-<br>3p&threshold=0) |
| Mib1 (mmu) ⓘ    | mmu-miR-27a-3p ⓘ |    | 0.502<br>(/DianaTools/index.php?<br>r=miroT_CDS/results&keywords=mmu-<br>miR-27a-<br>3p%20ENSMUSG00000024294&genes=ENSMUSG00000024294&mirnas=mmu-<br>miR-27a-<br>3p&threshold=0) |
| Mib1 (mmu) ⓘ    | mmu-miR-27a-3p ⓘ |    | 0.502<br>(/DianaTools/index.php?<br>r=miroT_CDS/results&keywords=mmu-<br>miR-27a-<br>3p%20ENSMUSG00000024294&genes=ENSMUSG00000024294&mirnas=mmu-<br>miR-27a-<br>3p&threshold=0) |
| Mettl7b (mmu) ⓘ | mmu-miR-27a-3p ⓘ |    | 0.493<br>(/DianaTools/index.php?<br>r=miroT_CDS/results&keywords=mmu-<br>miR-27a-<br>3p%20ENSMUSG00000025347&genes=ENSMUSG00000025347&mirnas=mmu-<br>miR-27a-<br>3p&threshold=0) |
| Slc12a2 (mmu) ⓘ | mmu-miR-27a-3p ⓘ |    | 0.490<br>(/DianaTools/index.php?<br>r=miroT_CDS/results&keywords=mmu-<br>miR-27a-<br>3p%20ENSMUSG00000024597&genes=ENSMUSG00000024597&mirnas=mmu-<br>miR-27a-<br>3p&threshold=0) |
| Nr3c1 (mmu) ⓘ   | mmu-miR-27a-3p ⓘ |    | 0.484<br>(/DianaTools/index.php?<br>r=miroT_CDS/results&keywords=mmu-<br>miR-27a-<br>3p%20ENSMUSG00000024431&genes=ENSMUSG00000024431&mirnas=mmu-<br>miR-27a-<br>3p&threshold=0) |
| Aqp4 (mmu) ⓘ    | mmu-miR-27a-3p ⓘ |  | 0.482<br>(/DianaTools/index.php?<br>r=miroT_CDS/results&keywords=mmu-<br>miR-27a-<br>3p%20ENSMUSG00000024411&genes=ENSMUSG00000024411&mirnas=mmu-<br>miR-27a-<br>3p&threshold=0) |
| Fbx15 (mmu) ⓘ   | mmu-miR-27a-3p ⓘ |  | 0.481<br>(/DianaTools/index.php?<br>r=miroT_CDS/results&keywords=mmu-<br>miR-27a-<br>3p%20ENSMUSG00000025226&genes=ENSMUSG00000025226&mirnas=mmu-<br>miR-27a-<br>3p&threshold=0) |
| Dpf2 (mmu) ⓘ    | mmu-miR-27a-3p ⓘ |  | 0.476<br>(/DianaTools/index.php?<br>r=miroT_CDS/results&keywords=mmu-<br>miR-27a-<br>3p%20ENSMUSG00000024826&genes=ENSMUSG00000024826&mirnas=mmu-<br>miR-27a-<br>3p&threshold=0) |
| Rnf165 (mmu) ⓘ  | mmu-miR-27a-3p ⓘ |  | 0.464<br>(/DianaTools/index.php?<br>r=miroT_CDS/results&keywords=mmu-<br>miR-27a-<br>3p%20ENSMUSG00000025427&genes=ENSMUSG00000025427&mirnas=mmu-<br>miR-27a-<br>3p&threshold=0) |

We have placed cookies on your device to help make this website and the services we offer better. By using this site, you agree to the use of cookies. [Learn more](#) (</DianaTools/index.php?r=site/terms>).

I accept

|                 |                  |    |                                                                                                                                                                                  |
|-----------------|------------------|----|----------------------------------------------------------------------------------------------------------------------------------------------------------------------------------|
| Tollip (mmu) ⓘ  | mmu-miR-27a-3p ⓘ | IP | 0.456<br>(/DianaTools/index.php?<br>r=miroT_CDS/results&keywords=mmu-<br>miR-27a-<br>3p%20ENSMUSG00000025139&genes=ENSMUSG00000025139&mirnas=mmu-<br>miR-27a-<br>3p&threshold=0) |
| P4hb (mmu) ⓘ    | mmu-miR-27a-3p ⓘ | IP | 0.454<br>(/DianaTools/index.php?<br>r=miroT_CDS/results&keywords=mmu-<br>miR-27a-<br>3p%20ENSMUSG00000025130&genes=ENSMUSG00000025130&mirnas=mmu-<br>miR-27a-<br>3p&threshold=0) |
| Tpgs2 (mmu) ⓘ   | mmu-miR-27a-3p ⓘ | IP | 0.452<br>(/DianaTools/index.php?<br>r=miroT_CDS/results&keywords=mmu-<br>miR-27a-<br>3p%20ENSMUSG00000024269&genes=ENSMUSG00000024269&mirnas=mmu-<br>miR-27a-<br>3p&threshold=0) |
| Psm13 (mmu) ⓘ   | mmu-miR-27a-3p ⓘ | IP | -                                                                                                                                                                                |
| Gaa (mmu) ⓘ     | mmu-miR-27a-3p ⓘ | IP | -                                                                                                                                                                                |
| Trim26 (mmu) ⓘ  | mmu-miR-27a-3p ⓘ | IP | -                                                                                                                                                                                |
| Men1 (mmu) ⓘ    | mmu-miR-27a-3p ⓘ | IP | -                                                                                                                                                                                |
| Csnk2b (mmu) ⓘ  | mmu-miR-27a-3p ⓘ | IP | -                                                                                                                                                                                |
| At13 (mmu) ⓘ    | mmu-miR-27a-3p ⓘ | IP | -                                                                                                                                                                                |
| Svil (mmu) ⓘ    | mmu-miR-27a-3p ⓘ | IP | -                                                                                                                                                                                |
| Pnpla2 (mmu) ⓘ  | mmu-miR-27a-3p ⓘ | IP | -                                                                                                                                                                                |
| Mtpap (mmu) ⓘ   | mmu-miR-27a-3p ⓘ | IP | -                                                                                                                                                                                |
| Stip1 (mmu) ⓘ   | mmu-miR-27a-3p ⓘ | IP | -                                                                                                                                                                                |
| Stip1 (mmu) ⓘ   | mmu-miR-27a-3p ⓘ | IP | -                                                                                                                                                                                |
| Aspscr1 (mmu) ⓘ | mmu-miR-27a-3p ⓘ | IP | -                                                                                                                                                                                |
| Syvn1 (mmu) ⓘ   | mmu-miR-27a-3p ⓘ | IP | -                                                                                                                                                                                |
| Csnk2b (mmu) ⓘ  | mmu-miR-27a-3p ⓘ | IP | -                                                                                                                                                                                |
| Zfand5 (mmu) ⓘ  | mmu-miR-27a-3p ⓘ | IP | -                                                                                                                                                                                |
| Cdc23 (mmu) ⓘ   | mmu-miR-27a-3p ⓘ | IP | -                                                                                                                                                                                |
| Ppp6r3 (mmu) ⓘ  | mmu-miR-27a-3p ⓘ | IP | -                                                                                                                                                                                |
| Minpp1 (mmu) ⓘ  | mmu-miR-27a-3p ⓘ | IP | -                                                                                                                                                                                |
| Sfxn3 (mmu) ⓘ   | mmu-miR-27a-3p ⓘ | IP | -                                                                                                                                                                                |
| Inpp5a (mmu) ⓘ  | mmu-miR-27a-3p ⓘ | IP | -                                                                                                                                                                                |
| Mrpl21 (mmu) ⓘ  | mmu-miR-27a-3p ⓘ | IP | -                                                                                                                                                                                |
| Dtna (mmu) ⓘ    | mmu-miR-27a-3p ⓘ | IP | -                                                                                                                                                                                |
| Elp2 (mmu) ⓘ    | mmu-miR-27a-3p ⓘ | IP | -                                                                                                                                                                                |

We have placed cookies on your device to help make this website and the services we offer better. By using this site, you agree to the use of cookies. [Learn more](#) (/DianaTools/index.php?r=site/terms)

I accept

|                       |                  |    |                                                                                                                                                               |
|-----------------------|------------------|----|---------------------------------------------------------------------------------------------------------------------------------------------------------------|
| Ube3a (mmu) ⓘ         | mmu-miR-27a-3p ⓘ | IP | -                                                                                                                                                             |
| Osbp (mmu) ⓘ          | mmu-miR-27a-3p ⓘ | IP | -                                                                                                                                                             |
| Pik3ap1 (mmu) ⓘ       | mmu-miR-27a-3p ⓘ | IP | -                                                                                                                                                             |
| Ifitm3 (mmu) ⓘ        | mmu-miR-27a-3p ⓘ | IP | -                                                                                                                                                             |
| Gabbr1 (mmu) ⓘ        | mmu-miR-27a-3p ⓘ | IP | -                                                                                                                                                             |
| Pcgf5 (mmu) ⓘ         | mmu-miR-27a-3p ⓘ | IP | -                                                                                                                                                             |
| Syt4 (mmu) ⓘ          | mmu-miR-27a-3p ⓘ | IP | -                                                                                                                                                             |
| Camk2a (mmu) ⓘ        | mmu-miR-27a-3p ⓘ | IP | -                                                                                                                                                             |
| 0610009O20Rik (mmu) ⓘ | mmu-miR-27a-3p ⓘ | IP | -                                                                                                                                                             |
| Tm9sf3 (mmu) ⓘ        | mmu-miR-27a-3p ⓘ | IP | -                                                                                                                                                             |
| Scyl1 (mmu) ⓘ         | mmu-miR-27a-3p ⓘ | IP | -                                                                                                                                                             |
| Arhgdia (mmu) ⓘ       | mmu-miR-27a-3p ⓘ | IP | -                                                                                                                                                             |
| Ccnj (mmu) ⓘ          | mmu-miR-27a-3p ⓘ | IP | -                                                                                                                                                             |
| Txn1 (mmu) ⓘ          | mmu-miR-27a-3p ⓘ | IP | -                                                                                                                                                             |
| Hdac3 (mmu) ⓘ         | mmu-miR-27a-3p ⓘ | IP | -                                                                                                                                                             |
| Tollip (mmu) ⓘ        | mmu-miR-27a-3p ⓘ | IP | -                                                                                                                                                             |
| Mrpl16 (mmu) ⓘ        | mmu-miR-27a-3p ⓘ | IP | -                                                                                                                                                             |
| Loxl4 (mmu) ⓘ         | mmu-miR-27a-3p ⓘ | IP | -                                                                                                                                                             |
| Ttc39c (mmu) ⓘ        | mmu-miR-27a-3p ⓘ | IP | -                                                                                                                                                             |
| Ttc4 (mmu) ⓘ          | mmu-miR-27a-3p ⓘ | IP | -                                                                                                                                                             |
| Rps14 (mmu) ⓘ         | mmu-miR-27a-3p ⓘ | IP | -                                                                                                                                                             |
| Mbd2 (mmu) ⓘ          | mmu-miR-27a-3p ⓘ | IP | -                                                                                                                                                             |
| Cpt1a (mmu) ⓘ         | mmu-miR-27a-3p ⓘ | IP | -                                                                                                                                                             |
| Cdk18 (mmu) ⓘ         | mmu-miR-27a-3p ⓘ | IP | 0.999<br>(/DianaTools/index.php?r=miroT_CDS/results&keywords=mmu-miR-27a-3p%20ENSMUSG00000026437&genes=ENSMUSG00000026437&mirnas=mmu-miR-27a-3p&threshold=0). |
| Abl2 (mmu) ⓘ          | mmu-miR-27a-3p ⓘ | IP | 0.999<br>(/DianaTools/index.php?r=miroT_CDS/results&keywords=mmu-miR-27a-3p%20ENSMUSG00000026596&genes=ENSMUSG00000026596&mirnas=mmu-miR-27a-3p&threshold=0). |
| Nabp1 (mmu) ⓘ         | mmu-miR-27a-3p ⓘ | IP | 0.999<br>(/DianaTools/index.php?r=miroT_CDS/results&keywords=mmu-miR-27a-3p%20ENSMUSG00000026107&genes=ENSMUSG00000026107&mirnas=mmu-miR-27a-3p&threshold=0). |

We have placed cookies on your device to help make this website and the services we offer better. By using this site, you agree to the use of cookies. [Learn more](#) (/DianaTools/index.php?r=site/terms).

I accept

|                                                                                                         |                                                                                                    |                                                                                      |                                                                                                                                                                                                                                                                                                                                                                  |
|---------------------------------------------------------------------------------------------------------|----------------------------------------------------------------------------------------------------|--------------------------------------------------------------------------------------|------------------------------------------------------------------------------------------------------------------------------------------------------------------------------------------------------------------------------------------------------------------------------------------------------------------------------------------------------------------|
| Creb1 (mmu)            | mmu-miR-27a-3p    |    | 0.997<br><a href="(/DianaTools/index.php?r=microT_CDS/results&amp;keywords=mmu-miR-27a-3p%20ENSMUSG00000025958&amp;genes=ENSMUSG00000025958&amp;mirnas=mmu-miR-27a-3p&amp;threshold=0)">(/DianaTools/index.php?r=microT_CDS/results&amp;keywords=mmu-miR-27a-3p%20ENSMUSG00000025958&amp;genes=ENSMUSG00000025958&amp;mirnas=mmu-miR-27a-3p&amp;threshold=0)</a> |
| Ing5 (mmu)             | mmu-miR-27a-3p    |    | 0.986<br><a href="(/DianaTools/index.php?r=microT_CDS/results&amp;keywords=mmu-miR-27a-3p%20ENSMUSG00000026283&amp;genes=ENSMUSG00000026283&amp;mirnas=mmu-miR-27a-3p&amp;threshold=0)">(/DianaTools/index.php?r=microT_CDS/results&amp;keywords=mmu-miR-27a-3p%20ENSMUSG00000026283&amp;genes=ENSMUSG00000026283&amp;mirnas=mmu-miR-27a-3p&amp;threshold=0)</a> |
| Pnkd (mmu)             | mmu-miR-27a-3p    |    | 0.985<br><a href="(/DianaTools/index.php?r=microT_CDS/results&amp;keywords=mmu-miR-27a-3p%20ENSMUSG00000026179&amp;genes=ENSMUSG00000026179&amp;mirnas=mmu-miR-27a-3p&amp;threshold=0)">(/DianaTools/index.php?r=microT_CDS/results&amp;keywords=mmu-miR-27a-3p%20ENSMUSG00000026179&amp;genes=ENSMUSG00000026179&amp;mirnas=mmu-miR-27a-3p&amp;threshold=0)</a> |
| Tmem206 (mmu)          | mmu-miR-27a-3p    |    | 0.948<br><a href="(/DianaTools/index.php?r=microT_CDS/results&amp;keywords=mmu-miR-27a-3p%20ENSMUSG00000026627&amp;genes=ENSMUSG00000026627&amp;mirnas=mmu-miR-27a-3p&amp;threshold=0)">(/DianaTools/index.php?r=microT_CDS/results&amp;keywords=mmu-miR-27a-3p%20ENSMUSG00000026627&amp;genes=ENSMUSG00000026627&amp;mirnas=mmu-miR-27a-3p&amp;threshold=0)</a> |
| Dst (mmu)              | mmu-miR-27a-3p    |    | 0.943<br><a href="(/DianaTools/index.php?r=microT_CDS/results&amp;keywords=mmu-miR-27a-3p%20ENSMUSG00000026131&amp;genes=ENSMUSG00000026131&amp;mirnas=mmu-miR-27a-3p&amp;threshold=0)">(/DianaTools/index.php?r=microT_CDS/results&amp;keywords=mmu-miR-27a-3p%20ENSMUSG00000026131&amp;genes=ENSMUSG00000026131&amp;mirnas=mmu-miR-27a-3p&amp;threshold=0)</a> |
| Pikfyve (mmu)          | mmu-miR-27a-3p    |    | 0.902<br><a href="(/DianaTools/index.php?r=microT_CDS/results&amp;keywords=mmu-miR-27a-3p%20ENSMUSG00000025949&amp;genes=ENSMUSG00000025949&amp;mirnas=mmu-miR-27a-3p&amp;threshold=0)">(/DianaTools/index.php?r=microT_CDS/results&amp;keywords=mmu-miR-27a-3p%20ENSMUSG00000025949&amp;genes=ENSMUSG00000025949&amp;mirnas=mmu-miR-27a-3p&amp;threshold=0)</a> |
| Mkln1 (mmu)            | mmu-miR-27a-3p    |    | 0.848<br><a href="(/DianaTools/index.php?r=microT_CDS/results&amp;keywords=mmu-miR-27a-3p%20ENSMUSG00000025609&amp;genes=ENSMUSG00000025609&amp;mirnas=mmu-miR-27a-3p&amp;threshold=0)">(/DianaTools/index.php?r=microT_CDS/results&amp;keywords=mmu-miR-27a-3p%20ENSMUSG00000025609&amp;genes=ENSMUSG00000025609&amp;mirnas=mmu-miR-27a-3p&amp;threshold=0)</a> |
| 9430016H08Rik (mmu)  | mmu-miR-27a-3p  |  | 0.826<br><a href="(/DianaTools/index.php?r=microT_CDS/results&amp;keywords=mmu-miR-27a-3p%20ENSMUSG00000025971&amp;genes=ENSMUSG00000025971&amp;mirnas=mmu-miR-27a-3p&amp;threshold=0)">(/DianaTools/index.php?r=microT_CDS/results&amp;keywords=mmu-miR-27a-3p%20ENSMUSG00000025971&amp;genes=ENSMUSG00000025971&amp;mirnas=mmu-miR-27a-3p&amp;threshold=0)</a> |
| Nfasc (mmu)          | mmu-miR-27a-3p  |  | 0.810<br><a href="(/DianaTools/index.php?r=microT_CDS/results&amp;keywords=mmu-miR-27a-3p%20ENSMUSG00000026442&amp;genes=ENSMUSG00000026442&amp;mirnas=mmu-miR-27a-3p&amp;threshold=0)">(/DianaTools/index.php?r=microT_CDS/results&amp;keywords=mmu-miR-27a-3p%20ENSMUSG00000026442&amp;genes=ENSMUSG00000026442&amp;mirnas=mmu-miR-27a-3p&amp;threshold=0)</a> |
| Icos (mmu)           | mmu-miR-27a-3p  |  | 0.801<br><a href="(/DianaTools/index.php?r=microT_CDS/results&amp;keywords=mmu-miR-27a-3p%20ENSMUSG00000026009&amp;genes=ENSMUSG00000026009&amp;mirnas=mmu-miR-27a-3p&amp;threshold=0)">(/DianaTools/index.php?r=microT_CDS/results&amp;keywords=mmu-miR-27a-3p%20ENSMUSG00000026009&amp;genes=ENSMUSG00000026009&amp;mirnas=mmu-miR-27a-3p&amp;threshold=0)</a> |
| Xpr1 (mmu)           | mmu-miR-27a-3p  |  | 0.798<br><a href="(/DianaTools/index.php?r=microT_CDS/results&amp;keywords=mmu-miR-27a-3p%20ENSMUSG00000026469&amp;genes=ENSMUSG00000026469&amp;mirnas=mmu-miR-27a-3p&amp;threshold=0)">(/DianaTools/index.php?r=microT_CDS/results&amp;keywords=mmu-miR-27a-3p%20ENSMUSG00000026469&amp;genes=ENSMUSG00000026469&amp;mirnas=mmu-miR-27a-3p&amp;threshold=0)</a> |

We have placed cookies on your device to help make this website and the services we offer better. By using this site, you agree to the use of cookies. [Learn more](#) ([\(/DianaTools/index.php?r=site/terms\)]((/DianaTools/index.php?r=site/terms)))

I accept

|                  |                  |                                                                                      |                                                                                                                                                                                                                                                                                                                                                                                           |
|------------------|------------------|--------------------------------------------------------------------------------------|-------------------------------------------------------------------------------------------------------------------------------------------------------------------------------------------------------------------------------------------------------------------------------------------------------------------------------------------------------------------------------------------|
| Mark1 (mmu) ⓘ    | mmu-miR-27a-3p ⓘ |    | 0.742<br><a href="(/DianaTools/index.php?r=microT_CDS/results&amp;keywords=mmu-miR-27a-3p%20ENSMUSG00000026620&amp;genes=ENSMUSG00000026620&amp;mirnas=mmu-miR-27a-3p&amp;threshold=0)">(/DianaTools/index.php?<br/>r=microT_CDS/results&amp;keywords=mmu-<br/>miR-27a-<br/>3p%20ENSMUSG00000026620&amp;genes=ENSMUSG00000026620&amp;mirnas=mmu-<br/>miR-27a-<br/>3p&amp;threshold=0)</a> |
| Agfg1 (mmu) ⓘ    | mmu-miR-27a-3p ⓘ |    | 0.738<br><a href="(/DianaTools/index.php?r=microT_CDS/results&amp;keywords=mmu-miR-27a-3p%20ENSMUSG00000026159&amp;genes=ENSMUSG00000026159&amp;mirnas=mmu-miR-27a-3p&amp;threshold=0)">(/DianaTools/index.php?<br/>r=microT_CDS/results&amp;keywords=mmu-<br/>miR-27a-<br/>3p%20ENSMUSG00000026159&amp;genes=ENSMUSG00000026159&amp;mirnas=mmu-<br/>miR-27a-<br/>3p&amp;threshold=0)</a> |
| Psmid1 (mmu) ⓘ   | mmu-miR-27a-3p ⓘ |    | 0.732<br><a href="(/DianaTools/index.php?r=microT_CDS/results&amp;keywords=mmu-miR-27a-3p%20ENSMUSG00000026229&amp;genes=ENSMUSG00000026229&amp;mirnas=mmu-miR-27a-3p&amp;threshold=0)">(/DianaTools/index.php?<br/>r=microT_CDS/results&amp;keywords=mmu-<br/>miR-27a-<br/>3p%20ENSMUSG00000026229&amp;genes=ENSMUSG00000026229&amp;mirnas=mmu-<br/>miR-27a-<br/>3p&amp;threshold=0)</a> |
| Epb4.115 (mmu) ⓘ | mmu-miR-27a-3p ⓘ |    | 0.727<br><a href="(/DianaTools/index.php?r=microT_CDS/results&amp;keywords=mmu-miR-27a-3p%20ENSMUSG00000026383&amp;genes=ENSMUSG00000026383&amp;mirnas=mmu-miR-27a-3p&amp;threshold=0)">(/DianaTools/index.php?<br/>r=microT_CDS/results&amp;keywords=mmu-<br/>miR-27a-<br/>3p%20ENSMUSG00000026383&amp;genes=ENSMUSG00000026383&amp;mirnas=mmu-<br/>miR-27a-<br/>3p&amp;threshold=0)</a> |
| Tada1 (mmu) ⓘ    | mmu-miR-27a-3p ⓘ |    | 0.722<br><a href="(/DianaTools/index.php?r=microT_CDS/results&amp;keywords=mmu-miR-27a-3p%20ENSMUSG00000026563&amp;genes=ENSMUSG00000026563&amp;mirnas=mmu-miR-27a-3p&amp;threshold=0)">(/DianaTools/index.php?<br/>r=microT_CDS/results&amp;keywords=mmu-<br/>miR-27a-<br/>3p%20ENSMUSG00000026563&amp;genes=ENSMUSG00000026563&amp;mirnas=mmu-<br/>miR-27a-<br/>3p&amp;threshold=0)</a> |
| Lamc1 (mmu) ⓘ    | mmu-miR-27a-3p ⓘ |    | 0.691<br><a href="(/DianaTools/index.php?r=microT_CDS/results&amp;keywords=mmu-miR-27a-3p%20ENSMUSG00000026478&amp;genes=ENSMUSG00000026478&amp;mirnas=mmu-miR-27a-3p&amp;threshold=0)">(/DianaTools/index.php?<br/>r=microT_CDS/results&amp;keywords=mmu-<br/>miR-27a-<br/>3p%20ENSMUSG00000026478&amp;genes=ENSMUSG00000026478&amp;mirnas=mmu-<br/>miR-27a-<br/>3p&amp;threshold=0)</a> |
| Ogfr1 (mmu) ⓘ    | mmu-miR-27a-3p ⓘ |    | 0.673<br><a href="(/DianaTools/index.php?r=microT_CDS/results&amp;keywords=mmu-miR-27a-3p%20ENSMUSG00000026158&amp;genes=ENSMUSG00000026158&amp;mirnas=mmu-miR-27a-3p&amp;threshold=0)">(/DianaTools/index.php?<br/>r=microT_CDS/results&amp;keywords=mmu-<br/>miR-27a-<br/>3p%20ENSMUSG00000026158&amp;genes=ENSMUSG00000026158&amp;mirnas=mmu-<br/>miR-27a-<br/>3p&amp;threshold=0)</a> |
| Ptpn14 (mmu) ⓘ   | mmu-miR-27a-3p ⓘ |  | 0.670<br><a href="(/DianaTools/index.php?r=microT_CDS/results&amp;keywords=mmu-miR-27a-3p%20ENSMUSG00000026604&amp;genes=ENSMUSG00000026604&amp;mirnas=mmu-miR-27a-3p&amp;threshold=0)">(/DianaTools/index.php?<br/>r=microT_CDS/results&amp;keywords=mmu-<br/>miR-27a-<br/>3p%20ENSMUSG00000026604&amp;genes=ENSMUSG00000026604&amp;mirnas=mmu-<br/>miR-27a-<br/>3p&amp;threshold=0)</a> |
| Ccnt2 (mmu) ⓘ    | mmu-miR-27a-3p ⓘ |  | 0.663<br><a href="(/DianaTools/index.php?r=microT_CDS/results&amp;keywords=mmu-miR-27a-3p%20ENSMUSG00000026349&amp;genes=ENSMUSG00000026349&amp;mirnas=mmu-miR-27a-3p&amp;threshold=0)">(/DianaTools/index.php?<br/>r=microT_CDS/results&amp;keywords=mmu-<br/>miR-27a-<br/>3p%20ENSMUSG00000026349&amp;genes=ENSMUSG00000026349&amp;mirnas=mmu-<br/>miR-27a-<br/>3p&amp;threshold=0)</a> |
| Itm2c (mmu) ⓘ    | mmu-miR-27a-3p ⓘ |  | 0.647<br><a href="(/DianaTools/index.php?r=microT_CDS/results&amp;keywords=mmu-miR-27a-3p%20ENSMUSG00000026223&amp;genes=ENSMUSG00000026223&amp;mirnas=mmu-miR-27a-3p&amp;threshold=0)">(/DianaTools/index.php?<br/>r=microT_CDS/results&amp;keywords=mmu-<br/>miR-27a-<br/>3p%20ENSMUSG00000026223&amp;genes=ENSMUSG00000026223&amp;mirnas=mmu-<br/>miR-27a-<br/>3p&amp;threshold=0)</a> |
| Desi2 (mmu) ⓘ    | mmu-miR-27a-3p ⓘ |  | 0.646<br><a href="(/DianaTools/index.php?r=microT_CDS/results&amp;keywords=mmu-miR-27a-3p%20ENSMUSG00000026502&amp;genes=ENSMUSG00000026502&amp;mirnas=mmu-miR-27a-3p&amp;threshold=0)">(/DianaTools/index.php?<br/>r=microT_CDS/results&amp;keywords=mmu-<br/>miR-27a-<br/>3p%20ENSMUSG00000026502&amp;genes=ENSMUSG00000026502&amp;mirnas=mmu-<br/>miR-27a-<br/>3p&amp;threshold=0)</a> |

We have placed cookies on your device to help make this website and the services we offer better. By using this site, you agree to the use of cookies. [Learn more](#) ([/DianaTools/index.php?r=site/terms]((/DianaTools/index.php?r=site/terms))).

I accept

|                |                  |                                                                                      |                                                                                                                                                                                                               |
|----------------|------------------|--------------------------------------------------------------------------------------|---------------------------------------------------------------------------------------------------------------------------------------------------------------------------------------------------------------|
| Sgk3 (mmu) ⓘ   | mmu-miR-27a-3p ⓘ |    | <a href="#">0.638</a><br><a href="#">(/DianaTools/index.php?r=microT_CDS/results&amp;keywords=mmu-miR-27a-3p%20ENSMUSG00000025915&amp;genes=ENSMUSG00000025915&amp;mirnas=mmu-miR-27a-3p&amp;threshold=0)</a> |
| Chst10 (mmu) ⓘ | mmu-miR-27a-3p ⓘ |    | <a href="#">0.615</a><br><a href="#">(/DianaTools/index.php?r=microT_CDS/results&amp;keywords=mmu-miR-27a-3p%20ENSMUSG00000026080&amp;genes=ENSMUSG00000026080&amp;mirnas=mmu-miR-27a-3p&amp;threshold=0)</a> |
| Plxna2 (mmu) ⓘ | mmu-miR-27a-3p ⓘ |    | <a href="#">0.613</a><br><a href="#">(/DianaTools/index.php?r=microT_CDS/results&amp;keywords=mmu-miR-27a-3p%20ENSMUSG00000026640&amp;genes=ENSMUSG00000026640&amp;mirnas=mmu-miR-27a-3p&amp;threshold=0)</a> |
| Trip12 (mmu) ⓘ | mmu-miR-27a-3p ⓘ |    | <a href="#">0.610</a><br><a href="#">(/DianaTools/index.php?r=microT_CDS/results&amp;keywords=mmu-miR-27a-3p%20ENSMUSG00000026219&amp;genes=ENSMUSG00000026219&amp;mirnas=mmu-miR-27a-3p&amp;threshold=0)</a> |
| C4bp (mmu) ⓘ   | mmu-miR-27a-3p ⓘ |    | <a href="#">0.603</a><br><a href="#">(/DianaTools/index.php?r=microT_CDS/results&amp;keywords=mmu-miR-27a-3p%20ENSMUSG00000026405&amp;genes=ENSMUSG00000026405&amp;mirnas=mmu-miR-27a-3p&amp;threshold=0)</a> |
| Rgs2 (mmu) ⓘ   | mmu-miR-27a-3p ⓘ |    | <a href="#">0.598</a><br><a href="#">(/DianaTools/index.php?r=microT_CDS/results&amp;keywords=mmu-miR-27a-3p%20ENSMUSG00000026360&amp;genes=ENSMUSG00000026360&amp;mirnas=mmu-miR-27a-3p&amp;threshold=0)</a> |
| Hspa4l (mmu) ⓘ | mmu-miR-27a-3p ⓘ |   | <a href="#">0.596</a><br><a href="#">(/DianaTools/index.php?r=microT_CDS/results&amp;keywords=mmu-miR-27a-3p%20ENSMUSG00000025757&amp;genes=ENSMUSG00000025757&amp;mirnas=mmu-miR-27a-3p&amp;threshold=0)</a> |
| Nek7 (mmu) ⓘ   | mmu-miR-27a-3p ⓘ |  | <a href="#">0.595</a><br><a href="#">(/DianaTools/index.php?r=microT_CDS/results&amp;keywords=mmu-miR-27a-3p%20ENSMUSG00000026393&amp;genes=ENSMUSG00000026393&amp;mirnas=mmu-miR-27a-3p&amp;threshold=0)</a> |
| Cd28 (mmu) ⓘ   | mmu-miR-27a-3p ⓘ |  | <a href="#">0.594</a><br><a href="#">(/DianaTools/index.php?r=microT_CDS/results&amp;keywords=mmu-miR-27a-3p%20ENSMUSG00000026012&amp;genes=ENSMUSG00000026012&amp;mirnas=mmu-miR-27a-3p&amp;threshold=0)</a> |
| Ahctf1 (mmu) ⓘ | mmu-miR-27a-3p ⓘ |  | <a href="#">0.593</a><br><a href="#">(/DianaTools/index.php?r=microT_CDS/results&amp;keywords=mmu-miR-27a-3p%20ENSMUSG00000026491&amp;genes=ENSMUSG00000026491&amp;mirnas=mmu-miR-27a-3p&amp;threshold=0)</a> |
| Faf2 (mmu) ⓘ   | mmu-miR-27a-3p ⓘ |  | <a href="#">0.591</a><br><a href="#">(/DianaTools/index.php?r=microT_CDS/results&amp;keywords=mmu-miR-27a-3p%20ENSMUSG00000025873&amp;genes=ENSMUSG00000025873&amp;mirnas=mmu-miR-27a-3p&amp;threshold=0)</a> |

We have placed cookies on your device to help make this website and the services we offer better. By using this site, you agree to the use of cookies. [Learn more](#) ([/DianaTools/index.php?r=site/terms](#)).

I accept

|                 |                  |                                                                                      |                                                                                                                                                                                                                                                                                                                                                                                           |
|-----------------|------------------|--------------------------------------------------------------------------------------|-------------------------------------------------------------------------------------------------------------------------------------------------------------------------------------------------------------------------------------------------------------------------------------------------------------------------------------------------------------------------------------------|
| Hsd17b7 (mmu) ⓘ | mmu-miR-27a-3p ⓘ |    | 0.577<br><a href="(/DianaTools/index.php?r=microT_CDS/results&amp;keywords=mmu-miR-27a-3p%20ENSMUSG00000026675&amp;genes=ENSMUSG00000026675&amp;mirnas=mmu-miR-27a-3p&amp;threshold=0)">(/DianaTools/index.php?<br/>r=microT_CDS/results&amp;keywords=mmu-<br/>miR-27a-<br/>3p%20ENSMUSG00000026675&amp;genes=ENSMUSG00000026675&amp;mirnas=mmu-<br/>miR-27a-<br/>3p&amp;threshold=0)</a> |
| Stat1 (mmu) ⓘ   | mmu-miR-27a-3p ⓘ |    | 0.562<br><a href="(/DianaTools/index.php?r=microT_CDS/results&amp;keywords=mmu-miR-27a-3p%20ENSMUSG00000026104&amp;genes=ENSMUSG00000026104&amp;mirnas=mmu-miR-27a-3p&amp;threshold=0)">(/DianaTools/index.php?<br/>r=microT_CDS/results&amp;keywords=mmu-<br/>miR-27a-<br/>3p%20ENSMUSG00000026104&amp;genes=ENSMUSG00000026104&amp;mirnas=mmu-<br/>miR-27a-<br/>3p&amp;threshold=0)</a> |
| Tmeff2 (mmu) ⓘ  | mmu-miR-27a-3p ⓘ |    | 0.547<br><a href="(/DianaTools/index.php?r=microT_CDS/results&amp;keywords=mmu-miR-27a-3p%20ENSMUSG00000026109&amp;genes=ENSMUSG00000026109&amp;mirnas=mmu-miR-27a-3p&amp;threshold=0)">(/DianaTools/index.php?<br/>r=microT_CDS/results&amp;keywords=mmu-<br/>miR-27a-<br/>3p%20ENSMUSG00000026109&amp;genes=ENSMUSG00000026109&amp;mirnas=mmu-<br/>miR-27a-<br/>3p&amp;threshold=0)</a> |
| Cenpf (mmu) ⓘ   | mmu-miR-27a-3p ⓘ |    | 0.538<br><a href="(/DianaTools/index.php?r=microT_CDS/results&amp;keywords=mmu-miR-27a-3p%20ENSMUSG00000026605&amp;genes=ENSMUSG00000026605&amp;mirnas=mmu-miR-27a-3p&amp;threshold=0)">(/DianaTools/index.php?<br/>r=microT_CDS/results&amp;keywords=mmu-<br/>miR-27a-<br/>3p%20ENSMUSG00000026605&amp;genes=ENSMUSG00000026605&amp;mirnas=mmu-<br/>miR-27a-<br/>3p&amp;threshold=0)</a> |
| Coa5 (mmu) ⓘ    | mmu-miR-27a-3p ⓘ |    | 0.521<br><a href="(/DianaTools/index.php?r=microT_CDS/results&amp;keywords=mmu-miR-27a-3p%20ENSMUSG00000026112&amp;genes=ENSMUSG00000026112&amp;mirnas=mmu-miR-27a-3p&amp;threshold=0)">(/DianaTools/index.php?<br/>r=microT_CDS/results&amp;keywords=mmu-<br/>miR-27a-<br/>3p%20ENSMUSG00000026112&amp;genes=ENSMUSG00000026112&amp;mirnas=mmu-<br/>miR-27a-<br/>3p&amp;threshold=0)</a> |
| Coa5 (mmu) ⓘ    | mmu-miR-27a-3p ⓘ |    | 0.521<br><a href="(/DianaTools/index.php?r=microT_CDS/results&amp;keywords=mmu-miR-27a-3p%20ENSMUSG00000026112&amp;genes=ENSMUSG00000026112&amp;mirnas=mmu-miR-27a-3p&amp;threshold=0)">(/DianaTools/index.php?<br/>r=microT_CDS/results&amp;keywords=mmu-<br/>miR-27a-<br/>3p%20ENSMUSG00000026112&amp;genes=ENSMUSG00000026112&amp;mirnas=mmu-<br/>miR-27a-<br/>3p&amp;threshold=0)</a> |
| Sept2 (mmu) ⓘ   | mmu-miR-27a-3p ⓘ |    | 0.520<br><a href="(/DianaTools/index.php?r=microT_CDS/results&amp;keywords=mmu-miR-27a-3p%20ENSMUSG00000026276&amp;genes=ENSMUSG00000026276&amp;mirnas=mmu-miR-27a-3p&amp;threshold=0)">(/DianaTools/index.php?<br/>r=microT_CDS/results&amp;keywords=mmu-<br/>miR-27a-<br/>3p%20ENSMUSG00000026276&amp;genes=ENSMUSG00000026276&amp;mirnas=mmu-<br/>miR-27a-<br/>3p&amp;threshold=0)</a> |
| Igfbp5 (mmu) ⓘ  | mmu-miR-27a-3p ⓘ |  | 0.511<br><a href="(/DianaTools/index.php?r=microT_CDS/results&amp;keywords=mmu-miR-27a-3p%20ENSMUSG00000026185&amp;genes=ENSMUSG00000026185&amp;mirnas=mmu-miR-27a-3p&amp;threshold=0)">(/DianaTools/index.php?<br/>r=microT_CDS/results&amp;keywords=mmu-<br/>miR-27a-<br/>3p%20ENSMUSG00000026185&amp;genes=ENSMUSG00000026185&amp;mirnas=mmu-<br/>miR-27a-<br/>3p&amp;threshold=0)</a> |
| Wdr73 (mmu) ⓘ   | mmu-miR-27a-3p ⓘ |  | 0.503<br><a href="(/DianaTools/index.php?r=microT_CDS/results&amp;keywords=mmu-miR-27a-3p%20ENSMUSG00000025722&amp;genes=ENSMUSG00000025722&amp;mirnas=mmu-miR-27a-3p&amp;threshold=0)">(/DianaTools/index.php?<br/>r=microT_CDS/results&amp;keywords=mmu-<br/>miR-27a-<br/>3p%20ENSMUSG00000025722&amp;genes=ENSMUSG00000025722&amp;mirnas=mmu-<br/>miR-27a-<br/>3p&amp;threshold=0)</a> |
| Lpgat1 (mmu) ⓘ  | mmu-miR-27a-3p ⓘ |  | 0.502<br><a href="(/DianaTools/index.php?r=microT_CDS/results&amp;keywords=mmu-miR-27a-3p%20ENSMUSG00000026623&amp;genes=ENSMUSG00000026623&amp;mirnas=mmu-miR-27a-3p&amp;threshold=0)">(/DianaTools/index.php?<br/>r=microT_CDS/results&amp;keywords=mmu-<br/>miR-27a-<br/>3p%20ENSMUSG00000026623&amp;genes=ENSMUSG00000026623&amp;mirnas=mmu-<br/>miR-27a-<br/>3p&amp;threshold=0)</a> |
| Fam129a (mmu) ⓘ | mmu-miR-27a-3p ⓘ |  | 0.486<br><a href="(/DianaTools/index.php?r=microT_CDS/results&amp;keywords=mmu-miR-27a-3p%20ENSMUSG00000026483&amp;genes=ENSMUSG00000026483&amp;mirnas=mmu-miR-27a-3p&amp;threshold=0)">(/DianaTools/index.php?<br/>r=microT_CDS/results&amp;keywords=mmu-<br/>miR-27a-<br/>3p%20ENSMUSG00000026483&amp;genes=ENSMUSG00000026483&amp;mirnas=mmu-<br/>miR-27a-<br/>3p&amp;threshold=0)</a> |

We have placed cookies on your device to help make this website and the services we offer better. By using this site, you agree to the use of cookies. [Learn more](#) ([\(/DianaTools/index.php?r=site/terms\)]((/DianaTools/index.php?r=site/terms)))

I accept



|                       |                  |    |                                                                                                                                                                                  |
|-----------------------|------------------|----|----------------------------------------------------------------------------------------------------------------------------------------------------------------------------------|
| Cps1 (mmu) ⓘ          | mmu-miR-27a-3p ⓘ | IP | 0.483<br>(/DianaTools/index.php?<br>r=miroT_CDS/results&keywords=mmu-<br>miR-27a-<br>3p%20ENSMUSG00000025991&genes=ENSMUSG00000025991&mirnas=mmu-<br>miR-27a-<br>3p&threshold=0) |
| Fbx116 (mmu) ⓘ        | mmu-miR-27a-3p ⓘ | IP | 0.478<br>(/DianaTools/index.php?<br>r=miroT_CDS/results&keywords=mmu-<br>miR-27a-<br>3p%20ENSMUSG00000025738&genes=ENSMUSG00000025738&mirnas=mmu-<br>miR-27a-<br>3p&threshold=0) |
| Rnpepl1 (mmu) ⓘ       | mmu-miR-27a-3p ⓘ | IP | 0.468<br>(/DianaTools/index.php?<br>r=miroT_CDS/results&keywords=mmu-<br>miR-27a-<br>3p%20ENSMUSG00000026269&genes=ENSMUSG00000026269&mirnas=mmu-<br>miR-27a-<br>3p&threshold=0) |
| Bard1 (mmu) ⓘ         | mmu-miR-27a-3p ⓘ | IP | 0.460<br>(/DianaTools/index.php?<br>r=miroT_CDS/results&keywords=mmu-<br>miR-27a-<br>3p%20ENSMUSG00000026196&genes=ENSMUSG00000026196&mirnas=mmu-<br>miR-27a-<br>3p&threshold=0) |
| Apcs (mmu) ⓘ          | mmu-miR-27a-3p ⓘ | IP | 0.452<br>(/DianaTools/index.php?<br>r=miroT_CDS/results&keywords=mmu-<br>miR-27a-<br>3p%20ENSMUSG00000026542&genes=ENSMUSG00000026542&mirnas=mmu-<br>miR-27a-<br>3p&threshold=0) |
| Nucks1 (mmu) ⓘ        | mmu-miR-27a-3p ⓘ | IP | 0.451<br>(/DianaTools/index.php?<br>r=miroT_CDS/results&keywords=mmu-<br>miR-27a-<br>3p%20ENSMUSG00000026434&genes=ENSMUSG00000026434&mirnas=mmu-<br>miR-27a-<br>3p&threshold=0) |
| Adck3 (mmu) ⓘ         | mmu-miR-27a-3p ⓘ | IP | -                                                                                                                                                                                |
| Agfg1 (mmu) ⓘ         | mmu-miR-27a-3p ⓘ | IP | -                                                                                                                                                                                |
| Ralgps2 (mmu) ⓘ       | mmu-miR-27a-3p ⓘ | IP | -                                                                                                                                                                                |
| Sp100 (mmu) ⓘ         | mmu-miR-27a-3p ⓘ | IP | -                                                                                                                                                                                |
| Uimc1 (mmu) ⓘ         | mmu-miR-27a-3p ⓘ | IP | -                                                                                                                                                                                |
| Mcm6 (mmu) ⓘ          | mmu-miR-27a-3p ⓘ | IP | -                                                                                                                                                                                |
| Raph1 (mmu) ⓘ         | mmu-miR-27a-3p ⓘ | IP | -                                                                                                                                                                                |
| Pecr (mmu) ⓘ          | mmu-miR-27a-3p ⓘ | IP | -                                                                                                                                                                                |
| Rgs1 (mmu) ⓘ          | mmu-miR-27a-3p ⓘ | IP | -                                                                                                                                                                                |
| 2810459M11Rik (mmu) ⓘ | mmu-miR-27a-3p ⓘ | IP | -                                                                                                                                                                                |
| Farsb (mmu) ⓘ         | mmu-miR-27a-3p ⓘ | IP | -                                                                                                                                                                                |
| Ptpnc (mmu) ⓘ         | mmu-miR-27a-3p ⓘ | IP | -                                                                                                                                                                                |
| Pgm2 (mmu) ⓘ          | mmu-miR-27a-3p ⓘ | IP | -                                                                                                                                                                                |
| Sell (mmu) ⓘ          | mmu-miR-27a-3p ⓘ | IP | -                                                                                                                                                                                |
| Tuba4a (mmu) ⓘ        | mmu-miR-27a-3p ⓘ | IP | -                                                                                                                                                                                |

We have placed cookies on your device to help make this website and the services we offer better. By using this site, you agree to the use of cookies. [Learn more](#) (/DianaTools/index.php?r=site/terms).

I accept

|                       |                  |    |   |
|-----------------------|------------------|----|---|
| Mettl21a (mmu) ⓘ      | mmu-miR-27a-3p ⓘ | IP | - |
| Jade1 (mmu) ⓘ         | mmu-miR-27a-3p ⓘ | IP | - |
| Rgs5 (mmu) ⓘ          | mmu-miR-27a-3p ⓘ | IP | - |
| Heatr2 (mmu) ⓘ        | mmu-miR-27a-3p ⓘ | IP | - |
| Stk17b (mmu) ⓘ        | mmu-miR-27a-3p ⓘ | IP | - |
| Cplx2 (mmu) ⓘ         | mmu-miR-27a-3p ⓘ | IP | - |
| Kctd3 (mmu) ⓘ         | mmu-miR-27a-3p ⓘ | IP | - |
| Uhmk1 (mmu) ⓘ         | mmu-miR-27a-3p ⓘ | IP | - |
| Slc35f5 (mmu) ⓘ       | mmu-miR-27a-3p ⓘ | IP | - |
| Slc35f5 (mmu) ⓘ       | mmu-miR-27a-3p ⓘ | IP | - |
| Ccnt2 (mmu) ⓘ         | mmu-miR-27a-3p ⓘ | IP | - |
| Itgb1 (mmu) ⓘ         | mmu-miR-27a-3p ⓘ | IP | - |
| Epha4 (mmu) ⓘ         | mmu-miR-27a-3p ⓘ | IP | - |
| Capn10 (mmu) ⓘ        | mmu-miR-27a-3p ⓘ | IP | - |
| Xpr1 (mmu) ⓘ          | mmu-miR-27a-3p ⓘ | IP | - |
| Fn1 (mmu) ⓘ           | mmu-miR-27a-3p ⓘ | IP | - |
| Sdc3 (mmu) ⓘ          | mmu-miR-27a-3p ⓘ | IP | - |
| Tuba4a (mmu) ⓘ        | mmu-miR-27a-3p ⓘ | IP | - |
| Ubxn4 (mmu) ⓘ         | mmu-miR-27a-3p ⓘ | IP | - |
| Syt2 (mmu) ⓘ          | mmu-miR-27a-3p ⓘ | IP | - |
| 2310035C23Rik (mmu) ⓘ | mmu-miR-27a-3p ⓘ | IP | - |
| Creb1 (mmu) ⓘ         | mmu-miR-27a-3p ⓘ | IP | - |
| Eif5b (mmu) ⓘ         | mmu-miR-27a-3p ⓘ | IP | - |
| Rhot2 (mmu) ⓘ         | mmu-miR-27a-3p ⓘ | IP | - |
| Plekhb2 (mmu) ⓘ       | mmu-miR-27a-3p ⓘ | IP | - |
| Abl2 (mmu) ⓘ          | mmu-miR-27a-3p ⓘ | IP | - |
| Fam107b (mmu) ⓘ       | mmu-miR-27a-3p ⓘ | IP | - |
| Trip12 (mmu) ⓘ        | mmu-miR-27a-3p ⓘ | IP | - |
| Clk1 (mmu) ⓘ          | mmu-miR-27a-3p ⓘ | IP | - |
| Aldh9a1 (mmu) ⓘ       | mmu-miR-27a-3p ⓘ | IP | - |
| Fh1 (mmu) ⓘ           | mmu-miR-27a-3p ⓘ | IP | - |
| Cd55 (mmu) ⓘ          | mmu-miR-27a-3p ⓘ | IP | - |

We have placed cookies on your device to help make this website and the services we offer better. By using this site, you agree to the use of cookies. [Learn more \(/DianaTools/index.php?r=site/terms\)](/DianaTools/index.php?r=site/terms).

I accept

|                  |                  |                                                                                      |                                                                                                                                                                                                                                                                                                                                                                         |
|------------------|------------------|--------------------------------------------------------------------------------------|-------------------------------------------------------------------------------------------------------------------------------------------------------------------------------------------------------------------------------------------------------------------------------------------------------------------------------------------------------------------------|
| Tsc1 (mmu) ⓘ     | mmu-miR-27a-3p ⓘ |    | <p>1.000<br/> <a href="/DianaTools/index.php?r=microT_CDS/results&amp;keywords=mmu-miR-27a-3p%20ENSMUSG00000026812&amp;genes=ENSMUSG00000026812&amp;mirnas=mmu-miR-27a-3p&amp;threshold=0">(/DianaTools/index.php?r=microT_CDS/results&amp;keywords=mmu-miR-27a-3p%20ENSMUSG00000026812&amp;genes=ENSMUSG00000026812&amp;mirnas=mmu-miR-27a-3p&amp;threshold=0)</a></p> |
| Zmat3 (mmu) ⓘ    | mmu-miR-27a-3p ⓘ |    | <p>0.996<br/> <a href="/DianaTools/index.php?r=microT_CDS/results&amp;keywords=mmu-miR-27a-3p%20ENSMUSG00000027663&amp;genes=ENSMUSG00000027663&amp;mirnas=mmu-miR-27a-3p&amp;threshold=0">(/DianaTools/index.php?r=microT_CDS/results&amp;keywords=mmu-miR-27a-3p%20ENSMUSG00000027663&amp;genes=ENSMUSG00000027663&amp;mirnas=mmu-miR-27a-3p&amp;threshold=0)</a></p> |
| Stk39 (mmu) ⓘ    | mmu-miR-27a-3p ⓘ |    | <p>0.988<br/> <a href="/DianaTools/index.php?r=microT_CDS/results&amp;keywords=mmu-miR-27a-3p%20ENSMUSG00000027030&amp;genes=ENSMUSG00000027030&amp;mirnas=mmu-miR-27a-3p&amp;threshold=0">(/DianaTools/index.php?r=microT_CDS/results&amp;keywords=mmu-miR-27a-3p%20ENSMUSG00000027030&amp;genes=ENSMUSG00000027030&amp;mirnas=mmu-miR-27a-3p&amp;threshold=0)</a></p> |
| Stk39 (mmu) ⓘ    | mmu-miR-27a-3p ⓘ |    | <p>0.988<br/> <a href="/DianaTools/index.php?r=microT_CDS/results&amp;keywords=mmu-miR-27a-3p%20ENSMUSG00000027030&amp;genes=ENSMUSG00000027030&amp;mirnas=mmu-miR-27a-3p&amp;threshold=0">(/DianaTools/index.php?r=microT_CDS/results&amp;keywords=mmu-miR-27a-3p%20ENSMUSG00000027030&amp;genes=ENSMUSG00000027030&amp;mirnas=mmu-miR-27a-3p&amp;threshold=0)</a></p> |
| Slc25a25 (mmu) ⓘ | mmu-miR-27a-3p ⓘ |    | <p>0.982<br/> <a href="/DianaTools/index.php?r=microT_CDS/results&amp;keywords=mmu-miR-27a-3p%20ENSMUSG00000026819&amp;genes=ENSMUSG00000026819&amp;mirnas=mmu-miR-27a-3p&amp;threshold=0">(/DianaTools/index.php?r=microT_CDS/results&amp;keywords=mmu-miR-27a-3p%20ENSMUSG00000026819&amp;genes=ENSMUSG00000026819&amp;mirnas=mmu-miR-27a-3p&amp;threshold=0)</a></p> |
| Snap25 (mmu) ⓘ   | mmu-miR-27a-3p ⓘ |    | <p>0.967<br/> <a href="/DianaTools/index.php?r=microT_CDS/results&amp;keywords=mmu-miR-27a-3p%20ENSMUSG00000027273&amp;genes=ENSMUSG00000027273&amp;mirnas=mmu-miR-27a-3p&amp;threshold=0">(/DianaTools/index.php?r=microT_CDS/results&amp;keywords=mmu-miR-27a-3p%20ENSMUSG00000027273&amp;genes=ENSMUSG00000027273&amp;mirnas=mmu-miR-27a-3p&amp;threshold=0)</a></p> |
| Ppp6c (mmu) ⓘ    | mmu-miR-27a-3p ⓘ |    | <p>0.949<br/> <a href="/DianaTools/index.php?r=microT_CDS/results&amp;keywords=mmu-miR-27a-3p%20ENSMUSG00000026753&amp;genes=ENSMUSG00000026753&amp;mirnas=mmu-miR-27a-3p&amp;threshold=0">(/DianaTools/index.php?r=microT_CDS/results&amp;keywords=mmu-miR-27a-3p%20ENSMUSG00000026753&amp;genes=ENSMUSG00000026753&amp;mirnas=mmu-miR-27a-3p&amp;threshold=0)</a></p> |
| Stard7 (mmu) ⓘ   | mmu-miR-27a-3p ⓘ |  | <p>0.944<br/> <a href="/DianaTools/index.php?r=microT_CDS/results&amp;keywords=mmu-miR-27a-3p%20ENSMUSG00000027367&amp;genes=ENSMUSG00000027367&amp;mirnas=mmu-miR-27a-3p&amp;threshold=0">(/DianaTools/index.php?r=microT_CDS/results&amp;keywords=mmu-miR-27a-3p%20ENSMUSG00000027367&amp;genes=ENSMUSG00000027367&amp;mirnas=mmu-miR-27a-3p&amp;threshold=0)</a></p> |
| Nek6 (mmu) ⓘ     | mmu-miR-27a-3p ⓘ |  | <p>0.932<br/> <a href="/DianaTools/index.php?r=microT_CDS/results&amp;keywords=mmu-miR-27a-3p%20ENSMUSG00000026749&amp;genes=ENSMUSG00000026749&amp;mirnas=mmu-miR-27a-3p&amp;threshold=0">(/DianaTools/index.php?r=microT_CDS/results&amp;keywords=mmu-miR-27a-3p%20ENSMUSG00000026749&amp;genes=ENSMUSG00000026749&amp;mirnas=mmu-miR-27a-3p&amp;threshold=0)</a></p> |
| Nek6 (mmu) ⓘ     | mmu-miR-27a-3p ⓘ |  | <p>0.932<br/> <a href="/DianaTools/index.php?r=microT_CDS/results&amp;keywords=mmu-miR-27a-3p%20ENSMUSG00000026749&amp;genes=ENSMUSG00000026749&amp;mirnas=mmu-miR-27a-3p&amp;threshold=0">(/DianaTools/index.php?r=microT_CDS/results&amp;keywords=mmu-miR-27a-3p%20ENSMUSG00000026749&amp;genes=ENSMUSG00000026749&amp;mirnas=mmu-miR-27a-3p&amp;threshold=0)</a></p> |
| Ubr1 (mmu) ⓘ     | mmu-miR-27a-3p ⓘ |  | <p>0.915<br/> <a href="/DianaTools/index.php?r=microT_CDS/results&amp;keywords=mmu-miR-27a-3p%20ENSMUSG00000027272&amp;genes=ENSMUSG00000027272&amp;mirnas=mmu-miR-27a-3p&amp;threshold=0">(/DianaTools/index.php?r=microT_CDS/results&amp;keywords=mmu-miR-27a-3p%20ENSMUSG00000027272&amp;genes=ENSMUSG00000027272&amp;mirnas=mmu-miR-27a-3p&amp;threshold=0)</a></p> |

We have placed cookies on your device to help make this website and the services we offer better. By using this site, you agree to the use of cookies. [Learn more \(/DianaTools/index.php?r=site/terms\)](/DianaTools/index.php?r=site/terms)

I accept

|                       |                  |                                                                                      |                                                                                                                                                                                                                                                                                                                                                                                           |
|-----------------------|------------------|--------------------------------------------------------------------------------------|-------------------------------------------------------------------------------------------------------------------------------------------------------------------------------------------------------------------------------------------------------------------------------------------------------------------------------------------------------------------------------------------|
| Trim44 (mmu) ⓘ        | mmu-miR-27a-3p ⓘ |    | 0.907<br><a href="(/DianaTools/index.php?r=microT_CDS/results&amp;keywords=mmu-miR-27a-3p%20ENSMUSG00000027189&amp;genes=ENSMUSG00000027189&amp;mirnas=mmu-miR-27a-3p&amp;threshold=0)">(/DianaTools/index.php?<br/>r=microT_CDS/results&amp;keywords=mmu-<br/>miR-27a-<br/>3p%20ENSMUSG00000027189&amp;genes=ENSMUSG00000027189&amp;mirnas=mmu-<br/>miR-27a-<br/>3p&amp;threshold=0)</a> |
| Pik3ca (mmu) ⓘ        | mmu-miR-27a-3p ⓘ |    | 0.880<br><a href="(/DianaTools/index.php?r=microT_CDS/results&amp;keywords=mmu-miR-27a-3p%20ENSMUSG00000027665&amp;genes=ENSMUSG00000027665&amp;mirnas=mmu-miR-27a-3p&amp;threshold=0)">(/DianaTools/index.php?<br/>r=microT_CDS/results&amp;keywords=mmu-<br/>miR-27a-<br/>3p%20ENSMUSG00000027665&amp;genes=ENSMUSG00000027665&amp;mirnas=mmu-<br/>miR-27a-<br/>3p&amp;threshold=0)</a> |
| Baz2b (mmu) ⓘ         | mmu-miR-27a-3p ⓘ |    | 0.848<br><a href="(/DianaTools/index.php?r=microT_CDS/results&amp;keywords=mmu-miR-27a-3p%20ENSMUSG00000026987&amp;genes=ENSMUSG00000026987&amp;mirnas=mmu-miR-27a-3p&amp;threshold=0)">(/DianaTools/index.php?<br/>r=microT_CDS/results&amp;keywords=mmu-<br/>miR-27a-<br/>3p%20ENSMUSG00000026987&amp;genes=ENSMUSG00000026987&amp;mirnas=mmu-<br/>miR-27a-<br/>3p&amp;threshold=0)</a> |
| Cers6 (mmu) ⓘ         | mmu-miR-27a-3p ⓘ |    | 0.825<br><a href="(/DianaTools/index.php?r=microT_CDS/results&amp;keywords=mmu-miR-27a-3p%20ENSMUSG00000027035&amp;genes=ENSMUSG00000027035&amp;mirnas=mmu-miR-27a-3p&amp;threshold=0)">(/DianaTools/index.php?<br/>r=microT_CDS/results&amp;keywords=mmu-<br/>miR-27a-<br/>3p%20ENSMUSG00000027035&amp;genes=ENSMUSG00000027035&amp;mirnas=mmu-<br/>miR-27a-<br/>3p&amp;threshold=0)</a> |
| Rbm18 (mmu) ⓘ         | mmu-miR-27a-3p ⓘ |    | 0.820<br><a href="(/DianaTools/index.php?r=microT_CDS/results&amp;keywords=mmu-miR-27a-3p%20ENSMUSG00000026889&amp;genes=ENSMUSG00000026889&amp;mirnas=mmu-miR-27a-3p&amp;threshold=0)">(/DianaTools/index.php?<br/>r=microT_CDS/results&amp;keywords=mmu-<br/>miR-27a-<br/>3p%20ENSMUSG00000026889&amp;genes=ENSMUSG00000026889&amp;mirnas=mmu-<br/>miR-27a-<br/>3p&amp;threshold=0)</a> |
| March7 (mmu) ⓘ        | mmu-miR-27a-3p ⓘ |    | 0.784<br><a href="(/DianaTools/index.php?r=microT_CDS/results&amp;keywords=mmu-miR-27a-3p%20ENSMUSG00000026977&amp;genes=ENSMUSG00000026977&amp;mirnas=mmu-miR-27a-3p&amp;threshold=0)">(/DianaTools/index.php?<br/>r=microT_CDS/results&amp;keywords=mmu-<br/>miR-27a-<br/>3p%20ENSMUSG00000026977&amp;genes=ENSMUSG00000026977&amp;mirnas=mmu-<br/>miR-27a-<br/>3p&amp;threshold=0)</a> |
| Fubp3 (mmu) ⓘ         | mmu-miR-27a-3p ⓘ |   | 0.781<br><a href="(/DianaTools/index.php?r=microT_CDS/results&amp;keywords=mmu-miR-27a-3p%20ENSMUSG00000026843&amp;genes=ENSMUSG00000026843&amp;mirnas=mmu-miR-27a-3p&amp;threshold=0)">(/DianaTools/index.php?<br/>r=microT_CDS/results&amp;keywords=mmu-<br/>miR-27a-<br/>3p%20ENSMUSG00000026843&amp;genes=ENSMUSG00000026843&amp;mirnas=mmu-<br/>miR-27a-<br/>3p&amp;threshold=0)</a> |
| Fubp3 (mmu) ⓘ         | mmu-miR-27a-3p ⓘ |  | 0.781<br><a href="(/DianaTools/index.php?r=microT_CDS/results&amp;keywords=mmu-miR-27a-3p%20ENSMUSG00000026843&amp;genes=ENSMUSG00000026843&amp;mirnas=mmu-miR-27a-3p&amp;threshold=0)">(/DianaTools/index.php?<br/>r=microT_CDS/results&amp;keywords=mmu-<br/>miR-27a-<br/>3p%20ENSMUSG00000026843&amp;genes=ENSMUSG00000026843&amp;mirnas=mmu-<br/>miR-27a-<br/>3p&amp;threshold=0)</a> |
| 4930402H24Rik (mmu) ⓘ | mmu-miR-27a-3p ⓘ |  | 0.763<br><a href="(/DianaTools/index.php?r=microT_CDS/results&amp;keywords=mmu-miR-27a-3p%20ENSMUSG00000027309&amp;genes=ENSMUSG00000027309&amp;mirnas=mmu-miR-27a-3p&amp;threshold=0)">(/DianaTools/index.php?<br/>r=microT_CDS/results&amp;keywords=mmu-<br/>miR-27a-<br/>3p%20ENSMUSG00000027309&amp;genes=ENSMUSG00000027309&amp;mirnas=mmu-<br/>miR-27a-<br/>3p&amp;threshold=0)</a> |
| Kif5c (mmu) ⓘ         | mmu-miR-27a-3p ⓘ |  | 0.745<br><a href="(/DianaTools/index.php?r=microT_CDS/results&amp;keywords=mmu-miR-27a-3p%20ENSMUSG00000026764&amp;genes=ENSMUSG00000026764&amp;mirnas=mmu-miR-27a-3p&amp;threshold=0)">(/DianaTools/index.php?<br/>r=microT_CDS/results&amp;keywords=mmu-<br/>miR-27a-<br/>3p%20ENSMUSG00000026764&amp;genes=ENSMUSG00000026764&amp;mirnas=mmu-<br/>miR-27a-<br/>3p&amp;threshold=0)</a> |
| Rasgrp1 (mmu) ⓘ       | mmu-miR-27a-3p ⓘ |  | 0.688<br><a href="(/DianaTools/index.php?r=microT_CDS/results&amp;keywords=mmu-miR-27a-3p%20ENSMUSG00000027347&amp;genes=ENSMUSG00000027347&amp;mirnas=mmu-miR-27a-3p&amp;threshold=0)">(/DianaTools/index.php?<br/>r=microT_CDS/results&amp;keywords=mmu-<br/>miR-27a-<br/>3p%20ENSMUSG00000027347&amp;genes=ENSMUSG00000027347&amp;mirnas=mmu-<br/>miR-27a-<br/>3p&amp;threshold=0)</a> |

We have placed cookies on your device to help make this website and the services we offer better. By using this site, you agree to the use of cookies. [Learn more](#) ([/DianaTools/index.php?r=site/terms]((/DianaTools/index.php?r=site/terms))).

I accept

|                 |                  |                                                                                      |                                                                                                                                                                                               |
|-----------------|------------------|--------------------------------------------------------------------------------------|-----------------------------------------------------------------------------------------------------------------------------------------------------------------------------------------------|
| Rbms1 (mmu) ⓘ   | mmu-miR-27a-3p ⓘ |    | 0.680<br><a href="#">(/DianaTools/index.php?r=microT_CDS/results&amp;keywords=mmu-miR-27a-3p%20ENSMUSG00000026970&amp;genes=ENSMUSG00000026970&amp;mirnas=mmu-miR-27a-3p&amp;threshold=0)</a> |
| Bcl2l11 (mmu) ⓘ | mmu-miR-27a-3p ⓘ |    | 0.669<br><a href="#">(/DianaTools/index.php?r=microT_CDS/results&amp;keywords=mmu-miR-27a-3p%20ENSMUSG00000027381&amp;genes=ENSMUSG00000027381&amp;mirnas=mmu-miR-27a-3p&amp;threshold=0)</a> |
| Ii21 (mmu) ⓘ    | mmu-miR-27a-3p ⓘ |    | 0.668<br><a href="#">(/DianaTools/index.php?r=microT_CDS/results&amp;keywords=mmu-miR-27a-3p%20ENSMUSG00000027718&amp;genes=ENSMUSG00000027718&amp;mirnas=mmu-miR-27a-3p&amp;threshold=0)</a> |
| Ii2ra (mmu) ⓘ   | mmu-miR-27a-3p ⓘ |    | 0.654<br><a href="#">(/DianaTools/index.php?r=microT_CDS/results&amp;keywords=mmu-miR-27a-3p%20ENSMUSG00000026770&amp;genes=ENSMUSG00000026770&amp;mirnas=mmu-miR-27a-3p&amp;threshold=0)</a> |
| Hc (mmu) ⓘ      | mmu-miR-27a-3p ⓘ |    | 0.651<br><a href="#">(/DianaTools/index.php?r=microT_CDS/results&amp;keywords=mmu-miR-27a-3p%20ENSMUSG00000026874&amp;genes=ENSMUSG00000026874&amp;mirnas=mmu-miR-27a-3p&amp;threshold=0)</a> |
| Hipk3 (mmu) ⓘ   | mmu-miR-27a-3p ⓘ |    | 0.646<br><a href="#">(/DianaTools/index.php?r=microT_CDS/results&amp;keywords=mmu-miR-27a-3p%20ENSMUSG00000027177&amp;genes=ENSMUSG00000027177&amp;mirnas=mmu-miR-27a-3p&amp;threshold=0)</a> |
| Hipk3 (mmu) ⓘ   | mmu-miR-27a-3p ⓘ |    | 0.646<br><a href="#">(/DianaTools/index.php?r=microT_CDS/results&amp;keywords=mmu-miR-27a-3p%20ENSMUSG00000027177&amp;genes=ENSMUSG00000027177&amp;mirnas=mmu-miR-27a-3p&amp;threshold=0)</a> |
| Mapre1 (mmu) ⓘ  | mmu-miR-27a-3p ⓘ |  | 0.644<br><a href="#">(/DianaTools/index.php?r=microT_CDS/results&amp;keywords=mmu-miR-27a-3p%20ENSMUSG00000027479&amp;genes=ENSMUSG00000027479&amp;mirnas=mmu-miR-27a-3p&amp;threshold=0)</a> |
| Rab14 (mmu) ⓘ   | mmu-miR-27a-3p ⓘ |  | 0.644<br><a href="#">(/DianaTools/index.php?r=microT_CDS/results&amp;keywords=mmu-miR-27a-3p%20ENSMUSG00000026878&amp;genes=ENSMUSG00000026878&amp;mirnas=mmu-miR-27a-3p&amp;threshold=0)</a> |
| Traf6 (mmu) ⓘ   | mmu-miR-27a-3p ⓘ |  | 0.644<br><a href="#">(/DianaTools/index.php?r=microT_CDS/results&amp;keywords=mmu-miR-27a-3p%20ENSMUSG00000027164&amp;genes=ENSMUSG00000027164&amp;mirnas=mmu-miR-27a-3p&amp;threshold=0)</a> |
| Atrn (mmu) ⓘ    | mmu-miR-27a-3p ⓘ |  | 0.642<br><a href="#">(/DianaTools/index.php?r=microT_CDS/results&amp;keywords=mmu-miR-27a-3p%20ENSMUSG00000027312&amp;genes=ENSMUSG00000027312&amp;mirnas=mmu-miR-27a-3p&amp;threshold=0)</a> |

We have placed cookies on your device to help make this website and the services we offer better. By using this site, you agree to the use of cookies. [Learn more](#) ([/DianaTools/index.php?r=site/terms](#)).

I accept

|                 |                  |                                                                                      |                                                                                                                                                                                                                                                                                                                                                                  |
|-----------------|------------------|--------------------------------------------------------------------------------------|------------------------------------------------------------------------------------------------------------------------------------------------------------------------------------------------------------------------------------------------------------------------------------------------------------------------------------------------------------------|
| Atrn (mmu) ⓘ    | mmu-miR-27a-3p ⓘ |    | 0.642<br><a href="(/DianaTools/index.php?r=microT_CDS/results&amp;keywords=mmu-miR-27a-3p%20ENSMUSG00000027312&amp;genes=ENSMUSG00000027312&amp;mirnas=mmu-miR-27a-3p&amp;threshold=0)">(/DianaTools/index.php?r=microT_CDS/results&amp;keywords=mmu-miR-27a-3p%20ENSMUSG00000027312&amp;genes=ENSMUSG00000027312&amp;mirnas=mmu-miR-27a-3p&amp;threshold=0)</a> |
| Lrp4 (mmu) ⓘ    | mmu-miR-27a-3p ⓘ |    | 0.637<br><a href="(/DianaTools/index.php?r=microT_CDS/results&amp;keywords=mmu-miR-27a-3p%20ENSMUSG00000027253&amp;genes=ENSMUSG00000027253&amp;mirnas=mmu-miR-27a-3p&amp;threshold=0)">(/DianaTools/index.php?r=microT_CDS/results&amp;keywords=mmu-miR-27a-3p%20ENSMUSG00000027253&amp;genes=ENSMUSG00000027253&amp;mirnas=mmu-miR-27a-3p&amp;threshold=0)</a> |
| Slc23a2 (mmu) ⓘ | mmu-miR-27a-3p ⓘ |    | 0.620<br><a href="(/DianaTools/index.php?r=microT_CDS/results&amp;keywords=mmu-miR-27a-3p%20ENSMUSG00000027340&amp;genes=ENSMUSG00000027340&amp;mirnas=mmu-miR-27a-3p&amp;threshold=0)">(/DianaTools/index.php?r=microT_CDS/results&amp;keywords=mmu-miR-27a-3p%20ENSMUSG00000027340&amp;genes=ENSMUSG00000027340&amp;mirnas=mmu-miR-27a-3p&amp;threshold=0)</a> |
| Nfatc2 (mmu) ⓘ  | mmu-miR-27a-3p ⓘ |    | 0.619<br><a href="(/DianaTools/index.php?r=microT_CDS/results&amp;keywords=mmu-miR-27a-3p%20ENSMUSG00000027544&amp;genes=ENSMUSG00000027544&amp;mirnas=mmu-miR-27a-3p&amp;threshold=0)">(/DianaTools/index.php?r=microT_CDS/results&amp;keywords=mmu-miR-27a-3p%20ENSMUSG00000027544&amp;genes=ENSMUSG00000027544&amp;mirnas=mmu-miR-27a-3p&amp;threshold=0)</a> |
| Tbl1xr1 (mmu) ⓘ | mmu-miR-27a-3p ⓘ |    | 0.617<br><a href="(/DianaTools/index.php?r=microT_CDS/results&amp;keywords=mmu-miR-27a-3p%20ENSMUSG00000027630&amp;genes=ENSMUSG00000027630&amp;mirnas=mmu-miR-27a-3p&amp;threshold=0)">(/DianaTools/index.php?r=microT_CDS/results&amp;keywords=mmu-miR-27a-3p%20ENSMUSG00000027630&amp;genes=ENSMUSG00000027630&amp;mirnas=mmu-miR-27a-3p&amp;threshold=0)</a> |
| Pter (mmu) ⓘ    | mmu-miR-27a-3p ⓘ |    | 0.592<br><a href="(/DianaTools/index.php?r=microT_CDS/results&amp;keywords=mmu-miR-27a-3p%20ENSMUSG00000026730&amp;genes=ENSMUSG00000026730&amp;mirnas=mmu-miR-27a-3p&amp;threshold=0)">(/DianaTools/index.php?r=microT_CDS/results&amp;keywords=mmu-miR-27a-3p%20ENSMUSG00000026730&amp;genes=ENSMUSG00000026730&amp;mirnas=mmu-miR-27a-3p&amp;threshold=0)</a> |
| Abi2 (mmu) ⓘ    | mmu-miR-27a-3p ⓘ |    | 0.579<br><a href="(/DianaTools/index.php?r=microT_CDS/results&amp;keywords=mmu-miR-27a-3p%20ENSMUSG00000026782&amp;genes=ENSMUSG00000026782&amp;mirnas=mmu-miR-27a-3p&amp;threshold=0)">(/DianaTools/index.php?r=microT_CDS/results&amp;keywords=mmu-miR-27a-3p%20ENSMUSG00000026782&amp;genes=ENSMUSG00000026782&amp;mirnas=mmu-miR-27a-3p&amp;threshold=0)</a> |
| Abi2 (mmu) ⓘ    | mmu-miR-27a-3p ⓘ |  | 0.579<br><a href="(/DianaTools/index.php?r=microT_CDS/results&amp;keywords=mmu-miR-27a-3p%20ENSMUSG00000026782&amp;genes=ENSMUSG00000026782&amp;mirnas=mmu-miR-27a-3p&amp;threshold=0)">(/DianaTools/index.php?r=microT_CDS/results&amp;keywords=mmu-miR-27a-3p%20ENSMUSG00000026782&amp;genes=ENSMUSG00000026782&amp;mirnas=mmu-miR-27a-3p&amp;threshold=0)</a> |
| Spred1 (mmu) ⓘ  | mmu-miR-27a-3p ⓘ |  | 0.565<br><a href="(/DianaTools/index.php?r=microT_CDS/results&amp;keywords=mmu-miR-27a-3p%20ENSMUSG00000027351&amp;genes=ENSMUSG00000027351&amp;mirnas=mmu-miR-27a-3p&amp;threshold=0)">(/DianaTools/index.php?r=microT_CDS/results&amp;keywords=mmu-miR-27a-3p%20ENSMUSG00000027351&amp;genes=ENSMUSG00000027351&amp;mirnas=mmu-miR-27a-3p&amp;threshold=0)</a> |
| Nusap1 (mmu) ⓘ  | mmu-miR-27a-3p ⓘ |  | 0.539<br><a href="(/DianaTools/index.php?r=microT_CDS/results&amp;keywords=mmu-miR-27a-3p%20ENSMUSG00000027306&amp;genes=ENSMUSG00000027306&amp;mirnas=mmu-miR-27a-3p&amp;threshold=0)">(/DianaTools/index.php?r=microT_CDS/results&amp;keywords=mmu-miR-27a-3p%20ENSMUSG00000027306&amp;genes=ENSMUSG00000027306&amp;mirnas=mmu-miR-27a-3p&amp;threshold=0)</a> |
| Ncoa3 (mmu) ⓘ   | mmu-miR-27a-3p ⓘ |  | 0.527<br><a href="(/DianaTools/index.php?r=microT_CDS/results&amp;keywords=mmu-miR-27a-3p%20ENSMUSG00000027678&amp;genes=ENSMUSG00000027678&amp;mirnas=mmu-miR-27a-3p&amp;threshold=0)">(/DianaTools/index.php?r=microT_CDS/results&amp;keywords=mmu-miR-27a-3p%20ENSMUSG00000027678&amp;genes=ENSMUSG00000027678&amp;mirnas=mmu-miR-27a-3p&amp;threshold=0)</a> |

We have placed cookies on your device to help make this website and the services we offer better. By using this site, you agree to the use of cookies. [Learn more](#) ([\(/DianaTools/index.php?r=site/terms\)]((/DianaTools/index.php?r=site/terms)))

I accept

|                |                  |                                                                                      |                                                                                                                                                                                                                                                                                                                                                                  |
|----------------|------------------|--------------------------------------------------------------------------------------|------------------------------------------------------------------------------------------------------------------------------------------------------------------------------------------------------------------------------------------------------------------------------------------------------------------------------------------------------------------|
| Nop10 (mmu) ⓘ  | mmu-miR-27a-3p ⓘ |    | 0.513<br><a href="(/DianaTools/index.php?r=microT_CDS/results&amp;keywords=mmu-miR-27a-3p%20ENSMUSG00000027133&amp;genes=ENSMUSG00000027133&amp;mirnas=mmu-miR-27a-3p&amp;threshold=0)">(/DianaTools/index.php?r=microT_CDS/results&amp;keywords=mmu-miR-27a-3p%20ENSMUSG00000027133&amp;genes=ENSMUSG00000027133&amp;mirnas=mmu-miR-27a-3p&amp;threshold=0)</a> |
| Nop10 (mmu) ⓘ  | mmu-miR-27a-3p ⓘ |    | 0.513<br><a href="(/DianaTools/index.php?r=microT_CDS/results&amp;keywords=mmu-miR-27a-3p%20ENSMUSG00000027133&amp;genes=ENSMUSG00000027133&amp;mirnas=mmu-miR-27a-3p&amp;threshold=0)">(/DianaTools/index.php?r=microT_CDS/results&amp;keywords=mmu-miR-27a-3p%20ENSMUSG00000027133&amp;genes=ENSMUSG00000027133&amp;mirnas=mmu-miR-27a-3p&amp;threshold=0)</a> |
| Ccna2 (mmu) ⓘ  | mmu-miR-27a-3p ⓘ |    | 0.495<br><a href="(/DianaTools/index.php?r=microT_CDS/results&amp;keywords=mmu-miR-27a-3p%20ENSMUSG00000027715&amp;genes=ENSMUSG00000027715&amp;mirnas=mmu-miR-27a-3p&amp;threshold=0)">(/DianaTools/index.php?r=microT_CDS/results&amp;keywords=mmu-miR-27a-3p%20ENSMUSG00000027715&amp;genes=ENSMUSG00000027715&amp;mirnas=mmu-miR-27a-3p&amp;threshold=0)</a> |
| Ptpn1 (mmu) ⓘ  | mmu-miR-27a-3p ⓘ |    | 0.492<br><a href="(/DianaTools/index.php?r=microT_CDS/results&amp;keywords=mmu-miR-27a-3p%20ENSMUSG00000027540&amp;genes=ENSMUSG00000027540&amp;mirnas=mmu-miR-27a-3p&amp;threshold=0)">(/DianaTools/index.php?r=microT_CDS/results&amp;keywords=mmu-miR-27a-3p%20ENSMUSG00000027540&amp;genes=ENSMUSG00000027540&amp;mirnas=mmu-miR-27a-3p&amp;threshold=0)</a> |
| Dusp2 (mmu) ⓘ  | mmu-miR-27a-3p ⓘ |    | 0.481<br><a href="(/DianaTools/index.php?r=microT_CDS/results&amp;keywords=mmu-miR-27a-3p%20ENSMUSG00000027368&amp;genes=ENSMUSG00000027368&amp;mirnas=mmu-miR-27a-3p&amp;threshold=0)">(/DianaTools/index.php?r=microT_CDS/results&amp;keywords=mmu-miR-27a-3p%20ENSMUSG00000027368&amp;genes=ENSMUSG00000027368&amp;mirnas=mmu-miR-27a-3p&amp;threshold=0)</a> |
| Mfn1 (mmu) ⓘ   | mmu-miR-27a-3p ⓘ |    | 0.474<br><a href="(/DianaTools/index.php?r=microT_CDS/results&amp;keywords=mmu-miR-27a-3p%20ENSMUSG00000027668&amp;genes=ENSMUSG00000027668&amp;mirnas=mmu-miR-27a-3p&amp;threshold=0)">(/DianaTools/index.php?r=microT_CDS/results&amp;keywords=mmu-miR-27a-3p%20ENSMUSG00000027668&amp;genes=ENSMUSG00000027668&amp;mirnas=mmu-miR-27a-3p&amp;threshold=0)</a> |
| Sord (mmu) ⓘ   | mmu-miR-27a-3p ⓘ |    | 0.456<br><a href="(/DianaTools/index.php?r=microT_CDS/results&amp;keywords=mmu-miR-27a-3p%20ENSMUSG00000027227&amp;genes=ENSMUSG00000027227&amp;mirnas=mmu-miR-27a-3p&amp;threshold=0)">(/DianaTools/index.php?r=microT_CDS/results&amp;keywords=mmu-miR-27a-3p%20ENSMUSG00000027227&amp;genes=ENSMUSG00000027227&amp;mirnas=mmu-miR-27a-3p&amp;threshold=0)</a> |
| Cd93 (mmu) ⓘ   | mmu-miR-27a-3p ⓘ |  | 0.450<br><a href="(/DianaTools/index.php?r=microT_CDS/results&amp;keywords=mmu-miR-27a-3p%20ENSMUSG00000027435&amp;genes=ENSMUSG00000027435&amp;mirnas=mmu-miR-27a-3p&amp;threshold=0)">(/DianaTools/index.php?r=microT_CDS/results&amp;keywords=mmu-miR-27a-3p%20ENSMUSG00000027435&amp;genes=ENSMUSG00000027435&amp;mirnas=mmu-miR-27a-3p&amp;threshold=0)</a> |
| Cd82 (mmu) ⓘ   | mmu-miR-27a-3p ⓘ |  | -                                                                                                                                                                                                                                                                                                                                                                |
| Abcb11 (mmu) ⓘ | mmu-miR-27a-3p ⓘ |  | -                                                                                                                                                                                                                                                                                                                                                                |
| Hat1 (mmu) ⓘ   | mmu-miR-27a-3p ⓘ |  | -                                                                                                                                                                                                                                                                                                                                                                |
| Myef2 (mmu) ⓘ  | mmu-miR-27a-3p ⓘ |  | -                                                                                                                                                                                                                                                                                                                                                                |
| Usp8 (mmu) ⓘ   | mmu-miR-27a-3p ⓘ |  | -                                                                                                                                                                                                                                                                                                                                                                |
| Tor1b (mmu) ⓘ  | mmu-miR-27a-3p ⓘ |  | -                                                                                                                                                                                                                                                                                                                                                                |
| Rpn2 (mmu) ⓘ   | mmu-miR-27a-3p ⓘ |  | -                                                                                                                                                                                                                                                                                                                                                                |
| Arrdc1 (mmu) ⓘ | mmu-miR-27a-3p ⓘ |  | -                                                                                                                                                                                                                                                                                                                                                                |
| Cdc25b (mmu) ⓘ | mmu-miR-27a-3p ⓘ |  | -                                                                                                                                                                                                                                                                                                                                                                |

We have placed cookies on your device to help make this website and the services we offer better. By using this site, you agree to the use of cookies. [Learn more](#)  
[\(/DianaTools/index.php?r=site/terms\)]((/DianaTools/index.php?r=site/terms))

I accept

|                       |                  |    |   |
|-----------------------|------------------|----|---|
| Sec16a (mmu) ⓘ        | mmu-miR-27a-3p ⓘ | IP | - |
| Prkcq (mmu) ⓘ         | mmu-miR-27a-3p ⓘ | IP | - |
| Kynu (mmu) ⓘ          | mmu-miR-27a-3p ⓘ | IP | - |
| Acss2 (mmu) ⓘ         | mmu-miR-27a-3p ⓘ | IP | - |
| Ect2 (mmu) ⓘ          | mmu-miR-27a-3p ⓘ | IP | - |
| Rab22a (mmu) ⓘ        | mmu-miR-27a-3p ⓘ | IP | - |
| Napb (mmu) ⓘ          | mmu-miR-27a-3p ⓘ | IP | - |
| Stom (mmu) ⓘ          | mmu-miR-27a-3p ⓘ | IP | - |
| Sema6d (mmu) ⓘ        | mmu-miR-27a-3p ⓘ | IP | - |
| Csrp2bp (mmu) ⓘ       | mmu-miR-27a-3p ⓘ | IP | - |
| 4930402H24Rik (mmu) ⓘ | mmu-miR-27a-3p ⓘ | IP | - |
| Anxa5 (mmu) ⓘ         | mmu-miR-27a-3p ⓘ | IP | - |
| Spata5 (mmu) ⓘ        | mmu-miR-27a-3p ⓘ | IP | - |
| St6galnac6 (mmu) ⓘ    | mmu-miR-27a-3p ⓘ | IP | - |
| Zeb2 (mmu) ⓘ          | mmu-miR-27a-3p ⓘ | IP | - |
| Nceh1 (mmu) ⓘ         | mmu-miR-27a-3p ⓘ | IP | - |
| Slc23a2 (mmu) ⓘ       | mmu-miR-27a-3p ⓘ | IP | - |
| Snrpb (mmu) ⓘ         | mmu-miR-27a-3p ⓘ | IP | - |
| Snrpb (mmu) ⓘ         | mmu-miR-27a-3p ⓘ | IP | - |
| Pamr1 (mmu) ⓘ         | mmu-miR-27a-3p ⓘ | IP | - |
| Hao1 (mmu) ⓘ          | mmu-miR-27a-3p ⓘ | IP | - |
| Mllt10 (mmu) ⓘ        | mmu-miR-27a-3p ⓘ | IP | - |
| Chgb (mmu) ⓘ          | mmu-miR-27a-3p ⓘ | IP | - |
| Samhd1 (mmu) ⓘ        | mmu-miR-27a-3p ⓘ | IP | - |
| Prkcq (mmu) ⓘ         | mmu-miR-27a-3p ⓘ | IP | - |
| Abl1 (mmu) ⓘ          | mmu-miR-27a-3p ⓘ | IP | - |
| Opr1 (mmu) ⓘ          | mmu-miR-27a-3p ⓘ | IP | - |
| Lamp5 (mmu) ⓘ         | mmu-miR-27a-3p ⓘ | IP | - |
| Ubox5 (mmu) ⓘ         | mmu-miR-27a-3p ⓘ | IP | - |
| Acbd5 (mmu) ⓘ         | mmu-miR-27a-3p ⓘ | IP | - |
| Nr4a2 (mmu) ⓘ         | mmu-miR-27a-3p ⓘ | IP | - |
| Prdx6 (mmu) ⓘ         | mmu-miR-27a-3p ⓘ | IP | - |

We have placed cookies on your device to help make this website and the services we offer better. By using this site, you agree to the use of cookies. [Learn more \(/DianaTools/index.php?r=site/terms\)](#).

I accept



|               |  |                |  |  |                                                                                                                                                                                                                                                                                                                                                                  |
|---------------|--|----------------|--|--|------------------------------------------------------------------------------------------------------------------------------------------------------------------------------------------------------------------------------------------------------------------------------------------------------------------------------------------------------------------|
| Fam73b (mmu)  |  | mmu-miR-27a-3p |  |  | -                                                                                                                                                                                                                                                                                                                                                                |
| Fam73b (mmu)  |  | mmu-miR-27a-3p |  |  | -                                                                                                                                                                                                                                                                                                                                                                |
| Dnm1 (mmu)    |  | mmu-miR-27a-3p |  |  | -                                                                                                                                                                                                                                                                                                                                                                |
| Tor1b (mmu)   |  | mmu-miR-27a-3p |  |  | -                                                                                                                                                                                                                                                                                                                                                                |
| Sec23b (mmu)  |  | mmu-miR-27a-3p |  |  | -                                                                                                                                                                                                                                                                                                                                                                |
| Caprin1 (mmu) |  | mmu-miR-27a-3p |  |  | -                                                                                                                                                                                                                                                                                                                                                                |
| Orc4 (mmu)    |  | mmu-miR-27a-3p |  |  | -                                                                                                                                                                                                                                                                                                                                                                |
| Fbxw7 (mmu)   |  | mmu-miR-27a-3p |  |  | 1.000<br><a href="(/DianaTools/index.php?r=microT_CDS/results&amp;keywords=mmu-miR-27a-3p%20ENSMUSG00000028086&amp;genes=ENSMUSG00000028086&amp;mirnas=mmu-miR-27a-3p&amp;threshold=0)">(/DianaTools/index.php?r=microT_CDS/results&amp;keywords=mmu-miR-27a-3p%20ENSMUSG00000028086&amp;genes=ENSMUSG00000028086&amp;mirnas=mmu-miR-27a-3p&amp;threshold=0)</a> |
| Slc7a11 (mmu) |  | mmu-miR-27a-3p |  |  | 0.999<br><a href="(/DianaTools/index.php?r=microT_CDS/results&amp;keywords=mmu-miR-27a-3p%20ENSMUSG00000027737&amp;genes=ENSMUSG00000027737&amp;mirnas=mmu-miR-27a-3p&amp;threshold=0)">(/DianaTools/index.php?r=microT_CDS/results&amp;keywords=mmu-miR-27a-3p%20ENSMUSG00000027737&amp;genes=ENSMUSG00000027737&amp;mirnas=mmu-miR-27a-3p&amp;threshold=0)</a> |
| Hivep3 (mmu)  |  | mmu-miR-27a-3p |  |  | 0.999<br><a href="(/DianaTools/index.php?r=microT_CDS/results&amp;keywords=mmu-miR-27a-3p%20ENSMUSG00000028634&amp;genes=ENSMUSG00000028634&amp;mirnas=mmu-miR-27a-3p&amp;threshold=0)">(/DianaTools/index.php?r=microT_CDS/results&amp;keywords=mmu-miR-27a-3p%20ENSMUSG00000028634&amp;genes=ENSMUSG00000028634&amp;mirnas=mmu-miR-27a-3p&amp;threshold=0)</a> |
| Hivep3 (mmu)  |  | mmu-miR-27a-3p |  |  | 0.999<br><a href="(/DianaTools/index.php?r=microT_CDS/results&amp;keywords=mmu-miR-27a-3p%20ENSMUSG00000028634&amp;genes=ENSMUSG00000028634&amp;mirnas=mmu-miR-27a-3p&amp;threshold=0)">(/DianaTools/index.php?r=microT_CDS/results&amp;keywords=mmu-miR-27a-3p%20ENSMUSG00000028634&amp;genes=ENSMUSG00000028634&amp;mirnas=mmu-miR-27a-3p&amp;threshold=0)</a> |
| Tsc22d2 (mmu) |  | mmu-miR-27a-3p |  |  | 0.989<br><a href="(/DianaTools/index.php?r=microT_CDS/results&amp;keywords=mmu-miR-27a-3p%20ENSMUSG00000027806&amp;genes=ENSMUSG00000027806&amp;mirnas=mmu-miR-27a-3p&amp;threshold=0)">(/DianaTools/index.php?r=microT_CDS/results&amp;keywords=mmu-miR-27a-3p%20ENSMUSG00000027806&amp;genes=ENSMUSG00000027806&amp;mirnas=mmu-miR-27a-3p&amp;threshold=0)</a> |
| Tsc22d2 (mmu) |  | mmu-miR-27a-3p |  |  | 0.989<br><a href="(/DianaTools/index.php?r=microT_CDS/results&amp;keywords=mmu-miR-27a-3p%20ENSMUSG00000027806&amp;genes=ENSMUSG00000027806&amp;mirnas=mmu-miR-27a-3p&amp;threshold=0)">(/DianaTools/index.php?r=microT_CDS/results&amp;keywords=mmu-miR-27a-3p%20ENSMUSG00000027806&amp;genes=ENSMUSG00000027806&amp;mirnas=mmu-miR-27a-3p&amp;threshold=0)</a> |
| Mfsd2a (mmu)  |  | mmu-miR-27a-3p |  |  | 0.983<br><a href="(/DianaTools/index.php?r=microT_CDS/results&amp;keywords=mmu-miR-27a-3p%20ENSMUSG00000028655&amp;genes=ENSMUSG00000028655&amp;mirnas=mmu-miR-27a-3p&amp;threshold=0)">(/DianaTools/index.php?r=microT_CDS/results&amp;keywords=mmu-miR-27a-3p%20ENSMUSG00000028655&amp;genes=ENSMUSG00000028655&amp;mirnas=mmu-miR-27a-3p&amp;threshold=0)</a> |
| Mfsd2a (mmu)  |  | mmu-miR-27a-3p |  |  | 0.983<br><a href="(/DianaTools/index.php?r=microT_CDS/results&amp;keywords=mmu-miR-27a-3p%20ENSMUSG00000028655&amp;genes=ENSMUSG00000028655&amp;mirnas=mmu-miR-27a-3p&amp;threshold=0)">(/DianaTools/index.php?r=microT_CDS/results&amp;keywords=mmu-miR-27a-3p%20ENSMUSG00000028655&amp;genes=ENSMUSG00000028655&amp;mirnas=mmu-miR-27a-3p&amp;threshold=0)</a> |

We have placed cookies on your device to help make this website and the services we offer better. By using this site, you agree to the use of cookies. [Learn more](#) ([/DianaTools/index.php?r=site/terms]((/DianaTools/index.php?r=site/terms))).

I accept

|                  |                  |                                                                                      |                                                                                                                                                                                                                        |
|------------------|------------------|--------------------------------------------------------------------------------------|------------------------------------------------------------------------------------------------------------------------------------------------------------------------------------------------------------------------|
| Dcaf12 (mmu) ⓘ   | mmu-miR-27a-3p ⓘ |    | <p><a href="#">0.911</a><br/> <a href="#">(/DianaTools/index.php?r=microT_CDS/results&amp;keywords=mmu-miR-27a-3p%20ENSMUSG00000028436&amp;genes=ENSMUSG00000028436&amp;mirnas=mmu-miR-27a-3p&amp;threshold=0)</a></p> |
| Cog6 (mmu) ⓘ     | mmu-miR-27a-3p ⓘ |    | <p><a href="#">0.909</a><br/> <a href="#">(/DianaTools/index.php?r=microT_CDS/results&amp;keywords=mmu-miR-27a-3p%20ENSMUSG00000027742&amp;genes=ENSMUSG00000027742&amp;mirnas=mmu-miR-27a-3p&amp;threshold=0)</a></p> |
| Ak2 (mmu) ⓘ      | mmu-miR-27a-3p ⓘ |    | <p><a href="#">0.906</a><br/> <a href="#">(/DianaTools/index.php?r=microT_CDS/results&amp;keywords=mmu-miR-27a-3p%20ENSMUSG00000028792&amp;genes=ENSMUSG00000028792&amp;mirnas=mmu-miR-27a-3p&amp;threshold=0)</a></p> |
| Serp1 (mmu) ⓘ    | mmu-miR-27a-3p ⓘ |    | <p><a href="#">0.887</a><br/> <a href="#">(/DianaTools/index.php?r=microT_CDS/results&amp;keywords=mmu-miR-27a-3p%20ENSMUSG00000027808&amp;genes=ENSMUSG00000027808&amp;mirnas=mmu-miR-27a-3p&amp;threshold=0)</a></p> |
| Serpini1 (mmu) ⓘ | mmu-miR-27a-3p ⓘ |    | <p><a href="#">0.879</a><br/> <a href="#">(/DianaTools/index.php?r=microT_CDS/results&amp;keywords=mmu-miR-27a-3p%20ENSMUSG00000027834&amp;genes=ENSMUSG00000027834&amp;mirnas=mmu-miR-27a-3p&amp;threshold=0)</a></p> |
| Macf1 (mmu) ⓘ    | mmu-miR-27a-3p ⓘ |    | <p><a href="#">0.877</a><br/> <a href="#">(/DianaTools/index.php?r=microT_CDS/results&amp;keywords=mmu-miR-27a-3p%20ENSMUSG00000028649&amp;genes=ENSMUSG00000028649&amp;mirnas=mmu-miR-27a-3p&amp;threshold=0)</a></p> |
| Ucg (mmu) ⓘ      | mmu-miR-27a-3p ⓘ |    | <p><a href="#">0.846</a><br/> <a href="#">(/DianaTools/index.php?r=microT_CDS/results&amp;keywords=mmu-miR-27a-3p%20ENSMUSG00000028381&amp;genes=ENSMUSG00000028381&amp;mirnas=mmu-miR-27a-3p&amp;threshold=0)</a></p> |
| Prkaa2 (mmu) ⓘ   | mmu-miR-27a-3p ⓘ |  | <p><a href="#">0.844</a><br/> <a href="#">(/DianaTools/index.php?r=microT_CDS/results&amp;keywords=mmu-miR-27a-3p%20ENSMUSG00000028518&amp;genes=ENSMUSG00000028518&amp;mirnas=mmu-miR-27a-3p&amp;threshold=0)</a></p> |
| Prkaa2 (mmu) ⓘ   | mmu-miR-27a-3p ⓘ |  | <p><a href="#">0.844</a><br/> <a href="#">(/DianaTools/index.php?r=microT_CDS/results&amp;keywords=mmu-miR-27a-3p%20ENSMUSG00000028518&amp;genes=ENSMUSG00000028518&amp;mirnas=mmu-miR-27a-3p&amp;threshold=0)</a></p> |
| Akirin2 (mmu) ⓘ  | mmu-miR-27a-3p ⓘ |  | <p><a href="#">0.826</a><br/> <a href="#">(/DianaTools/index.php?r=microT_CDS/results&amp;keywords=mmu-miR-27a-3p%20ENSMUSG00000028291&amp;genes=ENSMUSG00000028291&amp;mirnas=mmu-miR-27a-3p&amp;threshold=0)</a></p> |
| Akirin2 (mmu) ⓘ  | mmu-miR-27a-3p ⓘ |  | <p><a href="#">0.826</a><br/> <a href="#">(/DianaTools/index.php?r=microT_CDS/results&amp;keywords=mmu-miR-27a-3p%20ENSMUSG00000028291&amp;genes=ENSMUSG00000028291&amp;mirnas=mmu-miR-27a-3p&amp;threshold=0)</a></p> |

We have placed cookies on your device to help make this website and the services we offer better. By using this site, you agree to the use of cookies. [Learn more](#) ([/DianaTools/index.php?r=site/terms](#)).

I accept

|                 |                  |                                                                                      |                                                                                                                                                                                                                                                                                                                                                                                           |
|-----------------|------------------|--------------------------------------------------------------------------------------|-------------------------------------------------------------------------------------------------------------------------------------------------------------------------------------------------------------------------------------------------------------------------------------------------------------------------------------------------------------------------------------------|
| Rab33b (mmu) ⓘ  | mmu-miR-27a-3p ⓘ |    | 0.820<br><a href="(/DianaTools/index.php?r=microT_CDS/results&amp;keywords=mmu-miR-27a-3p%20ENSMUSG00000027739&amp;genes=ENSMUSG00000027739&amp;mirnas=mmu-miR-27a-3p&amp;threshold=0)">(/DianaTools/index.php?<br/>r=microT_CDS/results&amp;keywords=mmu-<br/>miR-27a-<br/>3p%20ENSMUSG00000027739&amp;genes=ENSMUSG00000027739&amp;mirnas=mmu-<br/>miR-27a-<br/>3p&amp;threshold=0)</a> |
| Slc35a3 (mmu) ⓘ | mmu-miR-27a-3p ⓘ |    | 0.790<br><a href="(/DianaTools/index.php?r=microT_CDS/results&amp;keywords=mmu-miR-27a-3p%20ENSMUSG00000027957&amp;genes=ENSMUSG00000027957&amp;mirnas=mmu-miR-27a-3p&amp;threshold=0)">(/DianaTools/index.php?<br/>r=microT_CDS/results&amp;keywords=mmu-<br/>miR-27a-<br/>3p%20ENSMUSG00000027957&amp;genes=ENSMUSG00000027957&amp;mirnas=mmu-<br/>miR-27a-<br/>3p&amp;threshold=0)</a> |
| Cyp4a14 (mmu) ⓘ | mmu-miR-27a-3p ⓘ |    | 0.775<br><a href="(/DianaTools/index.php?r=microT_CDS/results&amp;keywords=mmu-miR-27a-3p%20ENSMUSG00000028715&amp;genes=ENSMUSG00000028715&amp;mirnas=mmu-miR-27a-3p&amp;threshold=0)">(/DianaTools/index.php?<br/>r=microT_CDS/results&amp;keywords=mmu-<br/>miR-27a-<br/>3p%20ENSMUSG00000028715&amp;genes=ENSMUSG00000028715&amp;mirnas=mmu-<br/>miR-27a-<br/>3p&amp;threshold=0)</a> |
| Il6ra (mmu) ⓘ   | mmu-miR-27a-3p ⓘ |    | 0.775<br><a href="(/DianaTools/index.php?r=microT_CDS/results&amp;keywords=mmu-miR-27a-3p%20ENSMUSG00000027947&amp;genes=ENSMUSG00000027947&amp;mirnas=mmu-miR-27a-3p&amp;threshold=0)">(/DianaTools/index.php?<br/>r=microT_CDS/results&amp;keywords=mmu-<br/>miR-27a-<br/>3p%20ENSMUSG00000027947&amp;genes=ENSMUSG00000027947&amp;mirnas=mmu-<br/>miR-27a-<br/>3p&amp;threshold=0)</a> |
| Notch2 (mmu) ⓘ  | mmu-miR-27a-3p ⓘ |    | 0.768<br><a href="(/DianaTools/index.php?r=microT_CDS/results&amp;keywords=mmu-miR-27a-3p%20ENSMUSG00000027878&amp;genes=ENSMUSG00000027878&amp;mirnas=mmu-miR-27a-3p&amp;threshold=0)">(/DianaTools/index.php?<br/>r=microT_CDS/results&amp;keywords=mmu-<br/>miR-27a-<br/>3p%20ENSMUSG00000027878&amp;genes=ENSMUSG00000027878&amp;mirnas=mmu-<br/>miR-27a-<br/>3p&amp;threshold=0)</a> |
| Ppap2b (mmu) ⓘ  | mmu-miR-27a-3p ⓘ |    | 0.759<br><a href="(/DianaTools/index.php?r=microT_CDS/results&amp;keywords=mmu-miR-27a-3p%20ENSMUSG00000028517&amp;genes=ENSMUSG00000028517&amp;mirnas=mmu-miR-27a-3p&amp;threshold=0)">(/DianaTools/index.php?<br/>r=microT_CDS/results&amp;keywords=mmu-<br/>miR-27a-<br/>3p%20ENSMUSG00000028517&amp;genes=ENSMUSG00000028517&amp;mirnas=mmu-<br/>miR-27a-<br/>3p&amp;threshold=0)</a> |
| Hook1 (mmu) ⓘ   | mmu-miR-27a-3p ⓘ |    | 0.749<br><a href="(/DianaTools/index.php?r=microT_CDS/results&amp;keywords=mmu-miR-27a-3p%20ENSMUSG00000028572&amp;genes=ENSMUSG00000028572&amp;mirnas=mmu-miR-27a-3p&amp;threshold=0)">(/DianaTools/index.php?<br/>r=microT_CDS/results&amp;keywords=mmu-<br/>miR-27a-<br/>3p%20ENSMUSG00000028572&amp;genes=ENSMUSG00000028572&amp;mirnas=mmu-<br/>miR-27a-<br/>3p&amp;threshold=0)</a> |
| Kpna4 (mmu) ⓘ   | mmu-miR-27a-3p ⓘ |  | 0.738<br><a href="(/DianaTools/index.php?r=microT_CDS/results&amp;keywords=mmu-miR-27a-3p%20ENSMUSG00000027782&amp;genes=ENSMUSG00000027782&amp;mirnas=mmu-miR-27a-3p&amp;threshold=0)">(/DianaTools/index.php?<br/>r=microT_CDS/results&amp;keywords=mmu-<br/>miR-27a-<br/>3p%20ENSMUSG00000027782&amp;genes=ENSMUSG00000027782&amp;mirnas=mmu-<br/>miR-27a-<br/>3p&amp;threshold=0)</a> |
| Snx30 (mmu) ⓘ   | mmu-miR-27a-3p ⓘ |  | 0.730<br><a href="(/DianaTools/index.php?r=microT_CDS/results&amp;keywords=mmu-miR-27a-3p%20ENSMUSG00000028385&amp;genes=ENSMUSG00000028385&amp;mirnas=mmu-miR-27a-3p&amp;threshold=0)">(/DianaTools/index.php?<br/>r=microT_CDS/results&amp;keywords=mmu-<br/>miR-27a-<br/>3p%20ENSMUSG00000028385&amp;genes=ENSMUSG00000028385&amp;mirnas=mmu-<br/>miR-27a-<br/>3p&amp;threshold=0)</a> |
| Cpne3 (mmu) ⓘ   | mmu-miR-27a-3p ⓘ |  | 0.689<br><a href="(/DianaTools/index.php?r=microT_CDS/results&amp;keywords=mmu-miR-27a-3p%20ENSMUSG00000028228&amp;genes=ENSMUSG00000028228&amp;mirnas=mmu-miR-27a-3p&amp;threshold=0)">(/DianaTools/index.php?<br/>r=microT_CDS/results&amp;keywords=mmu-<br/>miR-27a-<br/>3p%20ENSMUSG00000028228&amp;genes=ENSMUSG00000028228&amp;mirnas=mmu-<br/>miR-27a-<br/>3p&amp;threshold=0)</a> |
| Cpne3 (mmu) ⓘ   | mmu-miR-27a-3p ⓘ |  | 0.689<br><a href="(/DianaTools/index.php?r=microT_CDS/results&amp;keywords=mmu-miR-27a-3p%20ENSMUSG00000028228&amp;genes=ENSMUSG00000028228&amp;mirnas=mmu-miR-27a-3p&amp;threshold=0)">(/DianaTools/index.php?<br/>r=microT_CDS/results&amp;keywords=mmu-<br/>miR-27a-<br/>3p%20ENSMUSG00000028228&amp;genes=ENSMUSG00000028228&amp;mirnas=mmu-<br/>miR-27a-<br/>3p&amp;threshold=0)</a> |

We have placed cookies on your device to help make this website and the services we offer better. By using this site, you agree to the use of cookies. [Learn more](#) ([\(/DianaTools/index.php?r=site/terms\)]((/DianaTools/index.php?r=site/terms)))

I accept

|                 |                  |                                                                                      |                                                                                                                                                                                                                                                                                                                                                                                           |
|-----------------|------------------|--------------------------------------------------------------------------------------|-------------------------------------------------------------------------------------------------------------------------------------------------------------------------------------------------------------------------------------------------------------------------------------------------------------------------------------------------------------------------------------------|
| Efna3 (mmu) ⓘ   | mmu-miR-27a-3p ⓘ |    | 0.686<br><a href="(/DianaTools/index.php?r=microT_CDS/results&amp;keywords=mmu-miR-27a-3p%20ENSMUSG00000028039&amp;genes=ENSMUSG00000028039&amp;mirnas=mmu-miR-27a-3p&amp;threshold=0)">(/DianaTools/index.php?<br/>r=microT_CDS/results&amp;keywords=mmu-<br/>miR-27a-<br/>3p%20ENSMUSG00000028039&amp;genes=ENSMUSG00000028039&amp;mirnas=mmu-<br/>miR-27a-<br/>3p&amp;threshold=0)</a> |
| Zdhc21 (mmu) ⓘ  | mmu-miR-27a-3p ⓘ |    | 0.680<br><a href="(/DianaTools/index.php?r=microT_CDS/results&amp;keywords=mmu-miR-27a-3p%20ENSMUSG00000028403&amp;genes=ENSMUSG00000028403&amp;mirnas=mmu-miR-27a-3p&amp;threshold=0)">(/DianaTools/index.php?<br/>r=microT_CDS/results&amp;keywords=mmu-<br/>miR-27a-<br/>3p%20ENSMUSG00000028403&amp;genes=ENSMUSG00000028403&amp;mirnas=mmu-<br/>miR-27a-<br/>3p&amp;threshold=0)</a> |
| Nras (mmu) ⓘ    | mmu-miR-27a-3p ⓘ |    | 0.673<br><a href="(/DianaTools/index.php?r=microT_CDS/results&amp;keywords=mmu-miR-27a-3p%20ENSMUSG00000027852&amp;genes=ENSMUSG00000027852&amp;mirnas=mmu-miR-27a-3p&amp;threshold=0)">(/DianaTools/index.php?<br/>r=microT_CDS/results&amp;keywords=mmu-<br/>miR-27a-<br/>3p%20ENSMUSG00000027852&amp;genes=ENSMUSG00000027852&amp;mirnas=mmu-<br/>miR-27a-<br/>3p&amp;threshold=0)</a> |
| Nras (mmu) ⓘ    | mmu-miR-27a-3p ⓘ |    | 0.673<br><a href="(/DianaTools/index.php?r=microT_CDS/results&amp;keywords=mmu-miR-27a-3p%20ENSMUSG00000027852&amp;genes=ENSMUSG00000027852&amp;mirnas=mmu-miR-27a-3p&amp;threshold=0)">(/DianaTools/index.php?<br/>r=microT_CDS/results&amp;keywords=mmu-<br/>miR-27a-<br/>3p%20ENSMUSG00000027852&amp;genes=ENSMUSG00000027852&amp;mirnas=mmu-<br/>miR-27a-<br/>3p&amp;threshold=0)</a> |
| Ppm1l (mmu) ⓘ   | mmu-miR-27a-3p ⓘ |    | 0.663<br><a href="(/DianaTools/index.php?r=microT_CDS/results&amp;keywords=mmu-miR-27a-3p%20ENSMUSG00000027784&amp;genes=ENSMUSG00000027784&amp;mirnas=mmu-miR-27a-3p&amp;threshold=0)">(/DianaTools/index.php?<br/>r=microT_CDS/results&amp;keywords=mmu-<br/>miR-27a-<br/>3p%20ENSMUSG00000027784&amp;genes=ENSMUSG00000027784&amp;mirnas=mmu-<br/>miR-27a-<br/>3p&amp;threshold=0)</a> |
| Ssr3 (mmu) ⓘ    | mmu-miR-27a-3p ⓘ |    | 0.659<br><a href="(/DianaTools/index.php?r=microT_CDS/results&amp;keywords=mmu-miR-27a-3p%20ENSMUSG00000027828&amp;genes=ENSMUSG00000027828&amp;mirnas=mmu-miR-27a-3p&amp;threshold=0)">(/DianaTools/index.php?<br/>r=microT_CDS/results&amp;keywords=mmu-<br/>miR-27a-<br/>3p%20ENSMUSG00000027828&amp;genes=ENSMUSG00000027828&amp;mirnas=mmu-<br/>miR-27a-<br/>3p&amp;threshold=0)</a> |
| Ssr3 (mmu) ⓘ    | mmu-miR-27a-3p ⓘ |   | 0.659<br><a href="(/DianaTools/index.php?r=microT_CDS/results&amp;keywords=mmu-miR-27a-3p%20ENSMUSG00000027828&amp;genes=ENSMUSG00000027828&amp;mirnas=mmu-miR-27a-3p&amp;threshold=0)">(/DianaTools/index.php?<br/>r=microT_CDS/results&amp;keywords=mmu-<br/>miR-27a-<br/>3p%20ENSMUSG00000027828&amp;genes=ENSMUSG00000027828&amp;mirnas=mmu-<br/>miR-27a-<br/>3p&amp;threshold=0)</a> |
| Mttp (mmu) ⓘ    | mmu-miR-27a-3p ⓘ |  | 0.631<br><a href="(/DianaTools/index.php?r=microT_CDS/results&amp;keywords=mmu-miR-27a-3p%20ENSMUSG00000028158&amp;genes=ENSMUSG00000028158&amp;mirnas=mmu-miR-27a-3p&amp;threshold=0)">(/DianaTools/index.php?<br/>r=microT_CDS/results&amp;keywords=mmu-<br/>miR-27a-<br/>3p%20ENSMUSG00000028158&amp;genes=ENSMUSG00000028158&amp;mirnas=mmu-<br/>miR-27a-<br/>3p&amp;threshold=0)</a> |
| Stxbp3a (mmu) ⓘ | mmu-miR-27a-3p ⓘ |  | 0.580<br><a href="(/DianaTools/index.php?r=microT_CDS/results&amp;keywords=mmu-miR-27a-3p%20ENSMUSG00000027882&amp;genes=ENSMUSG00000027882&amp;mirnas=mmu-miR-27a-3p&amp;threshold=0)">(/DianaTools/index.php?<br/>r=microT_CDS/results&amp;keywords=mmu-<br/>miR-27a-<br/>3p%20ENSMUSG00000027882&amp;genes=ENSMUSG00000027882&amp;mirnas=mmu-<br/>miR-27a-<br/>3p&amp;threshold=0)</a> |
| Tmem68 (mmu) ⓘ  | mmu-miR-27a-3p ⓘ |  | 0.554<br><a href="(/DianaTools/index.php?r=microT_CDS/results&amp;keywords=mmu-miR-27a-3p%20ENSMUSG00000028232&amp;genes=ENSMUSG00000028232&amp;mirnas=mmu-miR-27a-3p&amp;threshold=0)">(/DianaTools/index.php?<br/>r=microT_CDS/results&amp;keywords=mmu-<br/>miR-27a-<br/>3p%20ENSMUSG00000028232&amp;genes=ENSMUSG00000028232&amp;mirnas=mmu-<br/>miR-27a-<br/>3p&amp;threshold=0)</a> |
| Ndc1 (mmu) ⓘ    | mmu-miR-27a-3p ⓘ |  | 0.526<br><a href="(/DianaTools/index.php?r=microT_CDS/results&amp;keywords=mmu-miR-27a-3p%20ENSMUSG00000028614&amp;genes=ENSMUSG00000028614&amp;mirnas=mmu-miR-27a-3p&amp;threshold=0)">(/DianaTools/index.php?<br/>r=microT_CDS/results&amp;keywords=mmu-<br/>miR-27a-<br/>3p%20ENSMUSG00000028614&amp;genes=ENSMUSG00000028614&amp;mirnas=mmu-<br/>miR-27a-<br/>3p&amp;threshold=0)</a> |

We have placed cookies on your device to help make this website and the services we offer better. By using this site, you agree to the use of cookies. [Learn more](#) ([\(/DianaTools/index.php?r=site/terms\)]((/DianaTools/index.php?r=site/terms))).

I accept

|                   |                  |                                                                                      |                                                                                                                                                                                               |
|-------------------|------------------|--------------------------------------------------------------------------------------|-----------------------------------------------------------------------------------------------------------------------------------------------------------------------------------------------|
| Sike1 (mmu) ⓘ     | mmu-miR-27a-3p ⓘ |    | 0.521<br><a href="#">(/DianaTools/index.php?r=microT_CDS/results&amp;keywords=mmu-miR-27a-3p%20ENSMUSG00000027854&amp;genes=ENSMUSG00000027854&amp;mirnas=mmu-miR-27a-3p&amp;threshold=0)</a> |
| Gbp2 (mmu) ⓘ      | mmu-miR-27a-3p ⓘ |    | 0.498<br><a href="#">(/DianaTools/index.php?r=microT_CDS/results&amp;keywords=mmu-miR-27a-3p%20ENSMUSG00000028270&amp;genes=ENSMUSG00000028270&amp;mirnas=mmu-miR-27a-3p&amp;threshold=0)</a> |
| Slc33a1 (mmu) ⓘ   | mmu-miR-27a-3p ⓘ |    | 0.484<br><a href="#">(/DianaTools/index.php?r=microT_CDS/results&amp;keywords=mmu-miR-27a-3p%20ENSMUSG00000027822&amp;genes=ENSMUSG00000027822&amp;mirnas=mmu-miR-27a-3p&amp;threshold=0)</a> |
| Dclk2 (mmu) ⓘ     | mmu-miR-27a-3p ⓘ |    | 0.482<br><a href="#">(/DianaTools/index.php?r=microT_CDS/results&amp;keywords=mmu-miR-27a-3p%20ENSMUSG00000028078&amp;genes=ENSMUSG00000028078&amp;mirnas=mmu-miR-27a-3p&amp;threshold=0)</a> |
| Pde4b (mmu) ⓘ     | mmu-miR-27a-3p ⓘ |    | 0.481<br><a href="#">(/DianaTools/index.php?r=microT_CDS/results&amp;keywords=mmu-miR-27a-3p%20ENSMUSG00000028525&amp;genes=ENSMUSG00000028525&amp;mirnas=mmu-miR-27a-3p&amp;threshold=0)</a> |
| Ptprd (mmu) ⓘ     | mmu-miR-27a-3p ⓘ |    | 0.472<br><a href="#">(/DianaTools/index.php?r=microT_CDS/results&amp;keywords=mmu-miR-27a-3p%20ENSMUSG00000028399&amp;genes=ENSMUSG00000028399&amp;mirnas=mmu-miR-27a-3p&amp;threshold=0)</a> |
| Ptbp3 (mmu) ⓘ     | mmu-miR-27a-3p ⓘ |    | 0.460<br><a href="#">(/DianaTools/index.php?r=microT_CDS/results&amp;keywords=mmu-miR-27a-3p%20ENSMUSG00000028382&amp;genes=ENSMUSG00000028382&amp;mirnas=mmu-miR-27a-3p&amp;threshold=0)</a> |
| Adh5 (mmu) ⓘ      | mmu-miR-27a-3p ⓘ |  | 0.458<br><a href="#">(/DianaTools/index.php?r=microT_CDS/results&amp;keywords=mmu-miR-27a-3p%20ENSMUSG00000028138&amp;genes=ENSMUSG00000028138&amp;mirnas=mmu-miR-27a-3p&amp;threshold=0)</a> |
| Tnfrsf1b (mmu) ⓘ  | mmu-miR-27a-3p ⓘ |  | 0.458<br><a href="#">(/DianaTools/index.php?r=microT_CDS/results&amp;keywords=mmu-miR-27a-3p%20ENSMUSG00000028599&amp;genes=ENSMUSG00000028599&amp;mirnas=mmu-miR-27a-3p&amp;threshold=0)</a> |
| Trp53inp1 (mmu) ⓘ | mmu-miR-27a-3p ⓘ |  | 0.454<br><a href="#">(/DianaTools/index.php?r=microT_CDS/results&amp;keywords=mmu-miR-27a-3p%20ENSMUSG00000028211&amp;genes=ENSMUSG00000028211&amp;mirnas=mmu-miR-27a-3p&amp;threshold=0)</a> |
| Trp53inp1 (mmu) ⓘ | mmu-miR-27a-3p ⓘ |  | 0.454<br><a href="#">(/DianaTools/index.php?r=microT_CDS/results&amp;keywords=mmu-miR-27a-3p%20ENSMUSG00000028211&amp;genes=ENSMUSG00000028211&amp;mirnas=mmu-miR-27a-3p&amp;threshold=0)</a> |

We have placed cookies on your device to help make this website and the services we offer better. By using this site, you agree to the use of cookies. [Learn more](#) ([/DianaTools/index.php?r=site/terms](#))

I accept

|                       |                  |    |   |
|-----------------------|------------------|----|---|
| Usp24 (mmu) ⓘ         | mmu-miR-27a-3p ⓘ | IP | - |
| Polr3c (mmu) ⓘ        | mmu-miR-27a-3p ⓘ | IP | - |
| Ipp (mmu) ⓘ           | mmu-miR-27a-3p ⓘ | IP | - |
| Nfkb1 (mmu) ⓘ         | mmu-miR-27a-3p ⓘ | IP | - |
| Dnajb4 (mmu) ⓘ        | mmu-miR-27a-3p ⓘ | IP | - |
| Ash1l (mmu) ⓘ         | mmu-miR-27a-3p ⓘ | IP | - |
| Cap1 (mmu) ⓘ          | mmu-miR-27a-3p ⓘ | IP | - |
| Tmem68 (mmu) ⓘ        | mmu-miR-27a-3p ⓘ | IP | - |
| Tmem59 (mmu) ⓘ        | mmu-miR-27a-3p ⓘ | IP | - |
| Glpr2 (mmu) ⓘ         | mmu-miR-27a-3p ⓘ | IP | - |
| Tpm3 (mmu) ⓘ          | mmu-miR-27a-3p ⓘ | IP | - |
| Ak4 (mmu) ⓘ           | mmu-miR-27a-3p ⓘ | IP | - |
| Khdrbs1 (mmu) ⓘ       | mmu-miR-27a-3p ⓘ | IP | - |
| Rad23b (mmu) ⓘ        | mmu-miR-27a-3p ⓘ | IP | - |
| Sdcbp (mmu) ⓘ         | mmu-miR-27a-3p ⓘ | IP | - |
| Glrb (mmu) ⓘ          | mmu-miR-27a-3p ⓘ | IP | - |
| 3110043O21Rik (mmu) ⓘ | mmu-miR-27a-3p ⓘ | IP | - |
| Nbea (mmu) ⓘ          | mmu-miR-27a-3p ⓘ | IP | - |
| Mfsd1 (mmu) ⓘ         | mmu-miR-27a-3p ⓘ | IP | - |
| Gba (mmu) ⓘ           | mmu-miR-27a-3p ⓘ | IP | - |
| Dram2 (mmu) ⓘ         | mmu-miR-27a-3p ⓘ | IP | - |
| Dram2 (mmu) ⓘ         | mmu-miR-27a-3p ⓘ | IP | - |
| Tmem59 (mmu) ⓘ        | mmu-miR-27a-3p ⓘ | IP | - |
| Aco1 (mmu) ⓘ          | mmu-miR-27a-3p ⓘ | IP | - |
| Uox (mmu) ⓘ           | mmu-miR-27a-3p ⓘ | IP | - |
| Aadac (mmu) ⓘ         | mmu-miR-27a-3p ⓘ | IP | - |
| Jak1 (mmu) ⓘ          | mmu-miR-27a-3p ⓘ | IP | - |
| Angptl3 (mmu) ⓘ       | mmu-miR-27a-3p ⓘ | IP | - |
| Exosc3 (mmu) ⓘ        | mmu-miR-27a-3p ⓘ | IP | - |
| Hook1 (mmu) ⓘ         | mmu-miR-27a-3p ⓘ | IP | - |
| Mmp16 (mmu) ⓘ         | mmu-miR-27a-3p ⓘ | IP | - |
| Dab1 (mmu) ⓘ          | mmu-miR-27a-3p ⓘ | IP | - |

We have placed cookies on your device to help make this website and the services we offer better. By using this site, you agree to the use of cookies. [Learn more \(/DianaTools/index.php?r=site/terms\)](#).

I accept

|                 |                  |                                                                                      |                                                                                                                                                                                                                                                                                                                                                                  |
|-----------------|------------------|--------------------------------------------------------------------------------------|------------------------------------------------------------------------------------------------------------------------------------------------------------------------------------------------------------------------------------------------------------------------------------------------------------------------------------------------------------------|
| Tnfsf8 (mmu) ⓘ  | mmu-miR-27a-3p ⓘ |     | -                                                                                                                                                                                                                                                                                                                                                                |
| Eif4g3 (mmu) ⓘ  | mmu-miR-27a-3p ⓘ |    | -                                                                                                                                                                                                                                                                                                                                                                |
| Cdkn2c (mmu) ⓘ  | mmu-miR-27a-3p ⓘ |    | -                                                                                                                                                                                                                                                                                                                                                                |
| Alad (mmu) ⓘ    | mmu-miR-27a-3p ⓘ |    | -                                                                                                                                                                                                                                                                                                                                                                |
| Aldh4a1 (mmu) ⓘ | mmu-miR-27a-3p ⓘ |    | -                                                                                                                                                                                                                                                                                                                                                                |
| Smc2 (mmu) ⓘ    | mmu-miR-27a-3p ⓘ |    | -                                                                                                                                                                                                                                                                                                                                                                |
| Rit1 (mmu) ⓘ    | mmu-miR-27a-3p ⓘ |    | -                                                                                                                                                                                                                                                                                                                                                                |
| Mier1 (mmu) ⓘ   | mmu-miR-27a-3p ⓘ |    | -                                                                                                                                                                                                                                                                                                                                                                |
| Scamp3 (mmu) ⓘ  | mmu-miR-27a-3p ⓘ |    | -                                                                                                                                                                                                                                                                                                                                                                |
| Ctsk (mmu) ⓘ    | mmu-miR-27a-3p ⓘ |    | -                                                                                                                                                                                                                                                                                                                                                                |
| Hp1bp3 (mmu) ⓘ  | mmu-miR-27a-3p ⓘ |    | -                                                                                                                                                                                                                                                                                                                                                                |
| Nfia (mmu) ⓘ    | mmu-miR-27a-3p ⓘ |    | -                                                                                                                                                                                                                                                                                                                                                                |
| Cyp2u1 (mmu) ⓘ  | mmu-miR-27a-3p ⓘ |    | -                                                                                                                                                                                                                                                                                                                                                                |
| Pik3r3 (mmu) ⓘ  | mmu-miR-27a-3p ⓘ |    | -                                                                                                                                                                                                                                                                                                                                                                |
| Sec22b (mmu) ⓘ  | mmu-miR-27a-3p ⓘ |    | -                                                                                                                                                                                                                                                                                                                                                                |
| Tmeff1 (mmu) ⓘ  | mmu-miR-27a-3p ⓘ |    | -                                                                                                                                                                                                                                                                                                                                                                |
| Cds1 (mmu) ⓘ    | mmu-miR-27a-3p ⓘ |    | 1.000<br><a href="(/DianaTools/index.php?r=microT_CDS/results&amp;keywords=mmu-miR-27a-3p%20ENSMUSG00000029330&amp;genes=ENSMUSG00000029330&amp;mirnas=mmu-miR-27a-3p&amp;threshold=0)">(/DianaTools/index.php?r=microT_CDS/results&amp;keywords=mmu-miR-27a-3p%20ENSMUSG00000029330&amp;genes=ENSMUSG00000029330&amp;mirnas=mmu-miR-27a-3p&amp;threshold=0)</a> |
| Orc5 (mmu) ⓘ    | mmu-miR-27a-3p ⓘ |  | 0.979<br><a href="(/DianaTools/index.php?r=microT_CDS/results&amp;keywords=mmu-miR-27a-3p%20ENSMUSG00000029012&amp;genes=ENSMUSG00000029012&amp;mirnas=mmu-miR-27a-3p&amp;threshold=0)">(/DianaTools/index.php?r=microT_CDS/results&amp;keywords=mmu-miR-27a-3p%20ENSMUSG00000029012&amp;genes=ENSMUSG00000029012&amp;mirnas=mmu-miR-27a-3p&amp;threshold=0)</a> |
| Tgfb3 (mmu) ⓘ   | mmu-miR-27a-3p ⓘ |  | 0.978<br><a href="(/DianaTools/index.php?r=microT_CDS/results&amp;keywords=mmu-miR-27a-3p%20ENSMUSG00000029287&amp;genes=ENSMUSG00000029287&amp;mirnas=mmu-miR-27a-3p&amp;threshold=0)">(/DianaTools/index.php?r=microT_CDS/results&amp;keywords=mmu-miR-27a-3p%20ENSMUSG00000029287&amp;genes=ENSMUSG00000029287&amp;mirnas=mmu-miR-27a-3p&amp;threshold=0)</a> |
| Fam69a (mmu) ⓘ  | mmu-miR-27a-3p ⓘ |  | 0.921<br><a href="(/DianaTools/index.php?r=microT_CDS/results&amp;keywords=mmu-miR-27a-3p%20ENSMUSG00000029270&amp;genes=ENSMUSG00000029270&amp;mirnas=mmu-miR-27a-3p&amp;threshold=0)">(/DianaTools/index.php?r=microT_CDS/results&amp;keywords=mmu-miR-27a-3p%20ENSMUSG00000029270&amp;genes=ENSMUSG00000029270&amp;mirnas=mmu-miR-27a-3p&amp;threshold=0)</a> |
| Fam69a (mmu) ⓘ  | mmu-miR-27a-3p ⓘ |  | 0.921<br><a href="(/DianaTools/index.php?r=microT_CDS/results&amp;keywords=mmu-miR-27a-3p%20ENSMUSG00000029270&amp;genes=ENSMUSG00000029270&amp;mirnas=mmu-miR-27a-3p&amp;threshold=0)">(/DianaTools/index.php?r=microT_CDS/results&amp;keywords=mmu-miR-27a-3p%20ENSMUSG00000029270&amp;genes=ENSMUSG00000029270&amp;mirnas=mmu-miR-27a-3p&amp;threshold=0)</a> |

We have placed cookies on your device to help make this website and the services we offer better. By using this site, you agree to the use of cookies. [Learn more](#) ([\(/DianaTools/index.php?r=site/terms\)]((/DianaTools/index.php?r=site/terms)))

I accept

|                  |                  |                                                                                      |                                                                                                                                                                                                                                                                                                                                                                  |
|------------------|------------------|--------------------------------------------------------------------------------------|------------------------------------------------------------------------------------------------------------------------------------------------------------------------------------------------------------------------------------------------------------------------------------------------------------------------------------------------------------------|
| Ak2 (mmu) ⓘ      | mmu-miR-27a-3p ⓘ |    | 0.906<br><a href="(/DianaTools/index.php?r=microT_CDS/results&amp;keywords=mmu-miR-27a-3p%20ENSMUSG00000028792&amp;genes=ENSMUSG00000028792&amp;mirnas=mmu-miR-27a-3p&amp;threshold=0)">(/DianaTools/index.php?r=microT_CDS/results&amp;keywords=mmu-miR-27a-3p%20ENSMUSG00000028792&amp;genes=ENSMUSG00000028792&amp;mirnas=mmu-miR-27a-3p&amp;threshold=0)</a> |
| AU040320 (mmu) ⓘ | mmu-miR-27a-3p ⓘ |    | 0.854<br><a href="(/DianaTools/index.php?r=microT_CDS/results&amp;keywords=mmu-miR-27a-3p%20ENSMUSG00000028830&amp;genes=ENSMUSG00000028830&amp;mirnas=mmu-miR-27a-3p&amp;threshold=0)">(/DianaTools/index.php?r=microT_CDS/results&amp;keywords=mmu-miR-27a-3p%20ENSMUSG00000028830&amp;genes=ENSMUSG00000028830&amp;mirnas=mmu-miR-27a-3p&amp;threshold=0)</a> |
| Sfswap (mmu) ⓘ   | mmu-miR-27a-3p ⓘ |    | 0.821<br><a href="(/DianaTools/index.php?r=microT_CDS/results&amp;keywords=mmu-miR-27a-3p%20ENSMUSG00000029439&amp;genes=ENSMUSG00000029439&amp;mirnas=mmu-miR-27a-3p&amp;threshold=0)">(/DianaTools/index.php?r=microT_CDS/results&amp;keywords=mmu-miR-27a-3p%20ENSMUSG00000029439&amp;genes=ENSMUSG00000029439&amp;mirnas=mmu-miR-27a-3p&amp;threshold=0)</a> |
| Ppm1g (mmu) ⓘ    | mmu-miR-27a-3p ⓘ |    | 0.821<br><a href="(/DianaTools/index.php?r=microT_CDS/results&amp;keywords=mmu-miR-27a-3p%20ENSMUSG00000029147&amp;genes=ENSMUSG00000029147&amp;mirnas=mmu-miR-27a-3p&amp;threshold=0)">(/DianaTools/index.php?r=microT_CDS/results&amp;keywords=mmu-miR-27a-3p%20ENSMUSG00000029147&amp;genes=ENSMUSG00000029147&amp;mirnas=mmu-miR-27a-3p&amp;threshold=0)</a> |
| Sgcb (mmu) ⓘ     | mmu-miR-27a-3p ⓘ |    | 0.761<br><a href="(/DianaTools/index.php?r=microT_CDS/results&amp;keywords=mmu-miR-27a-3p%20ENSMUSG00000029156&amp;genes=ENSMUSG00000029156&amp;mirnas=mmu-miR-27a-3p&amp;threshold=0)">(/DianaTools/index.php?r=microT_CDS/results&amp;keywords=mmu-miR-27a-3p%20ENSMUSG00000029156&amp;genes=ENSMUSG00000029156&amp;mirnas=mmu-miR-27a-3p&amp;threshold=0)</a> |
| Rchy1 (mmu) ⓘ    | mmu-miR-27a-3p ⓘ |    | 0.694<br><a href="(/DianaTools/index.php?r=microT_CDS/results&amp;keywords=mmu-miR-27a-3p%20ENSMUSG00000029397&amp;genes=ENSMUSG00000029397&amp;mirnas=mmu-miR-27a-3p&amp;threshold=0)">(/DianaTools/index.php?r=microT_CDS/results&amp;keywords=mmu-miR-27a-3p%20ENSMUSG00000029397&amp;genes=ENSMUSG00000029397&amp;mirnas=mmu-miR-27a-3p&amp;threshold=0)</a> |
| Wasl (mmu) ⓘ     | mmu-miR-27a-3p ⓘ |   | 0.694<br><a href="(/DianaTools/index.php?r=microT_CDS/results&amp;keywords=mmu-miR-27a-3p%20ENSMUSG00000029684&amp;genes=ENSMUSG00000029684&amp;mirnas=mmu-miR-27a-3p&amp;threshold=0)">(/DianaTools/index.php?r=microT_CDS/results&amp;keywords=mmu-miR-27a-3p%20ENSMUSG00000029684&amp;genes=ENSMUSG00000029684&amp;mirnas=mmu-miR-27a-3p&amp;threshold=0)</a> |
| Dhx15 (mmu) ⓘ    | mmu-miR-27a-3p ⓘ |  | 0.694<br><a href="(/DianaTools/index.php?r=microT_CDS/results&amp;keywords=mmu-miR-27a-3p%20ENSMUSG00000029169&amp;genes=ENSMUSG00000029169&amp;mirnas=mmu-miR-27a-3p&amp;threshold=0)">(/DianaTools/index.php?r=microT_CDS/results&amp;keywords=mmu-miR-27a-3p%20ENSMUSG00000029169&amp;genes=ENSMUSG00000029169&amp;mirnas=mmu-miR-27a-3p&amp;threshold=0)</a> |
| Fkbp9 (mmu) ⓘ    | mmu-miR-27a-3p ⓘ |  | 0.689<br><a href="(/DianaTools/index.php?r=microT_CDS/results&amp;keywords=mmu-miR-27a-3p%20ENSMUSG00000029781&amp;genes=ENSMUSG00000029781&amp;mirnas=mmu-miR-27a-3p&amp;threshold=0)">(/DianaTools/index.php?r=microT_CDS/results&amp;keywords=mmu-miR-27a-3p%20ENSMUSG00000029781&amp;genes=ENSMUSG00000029781&amp;mirnas=mmu-miR-27a-3p&amp;threshold=0)</a> |
| Fkbp9 (mmu) ⓘ    | mmu-miR-27a-3p ⓘ |  | 0.689<br><a href="(/DianaTools/index.php?r=microT_CDS/results&amp;keywords=mmu-miR-27a-3p%20ENSMUSG00000029781&amp;genes=ENSMUSG00000029781&amp;mirnas=mmu-miR-27a-3p&amp;threshold=0)">(/DianaTools/index.php?r=microT_CDS/results&amp;keywords=mmu-miR-27a-3p%20ENSMUSG00000029781&amp;genes=ENSMUSG00000029781&amp;mirnas=mmu-miR-27a-3p&amp;threshold=0)</a> |
| Fip1l1 (mmu) ⓘ   | mmu-miR-27a-3p ⓘ |  | 0.688<br><a href="(/DianaTools/index.php?r=microT_CDS/results&amp;keywords=mmu-miR-27a-3p%20ENSMUSG00000029227&amp;genes=ENSMUSG00000029227&amp;mirnas=mmu-miR-27a-3p&amp;threshold=0)">(/DianaTools/index.php?r=microT_CDS/results&amp;keywords=mmu-miR-27a-3p%20ENSMUSG00000029227&amp;genes=ENSMUSG00000029227&amp;mirnas=mmu-miR-27a-3p&amp;threshold=0)</a> |

We have placed cookies on your device to help make this website and the services we offer better. By using this site, you agree to the use of cookies. [Learn more](#) ([\(/DianaTools/index.php?r=site/terms\)]((/DianaTools/index.php?r=site/terms)))

I accept



|                 |                  |                                                                                      |                                                                                                                                                                                               |
|-----------------|------------------|--------------------------------------------------------------------------------------|-----------------------------------------------------------------------------------------------------------------------------------------------------------------------------------------------|
| Gigyf1 (mmu) ⓘ  | mmu-miR-27a-3p ⓘ |    | 0.683<br><a href="#">(/DianaTools/index.php?r=microT_CDS/results&amp;keywords=mmu-miR-27a-3p%20ENSMUSG00000029714&amp;genes=ENSMUSG00000029714&amp;mirnas=mmu-miR-27a-3p&amp;threshold=0)</a> |
| Gigyf1 (mmu) ⓘ  | mmu-miR-27a-3p ⓘ |    | 0.683<br><a href="#">(/DianaTools/index.php?r=microT_CDS/results&amp;keywords=mmu-miR-27a-3p%20ENSMUSG00000029714&amp;genes=ENSMUSG00000029714&amp;mirnas=mmu-miR-27a-3p&amp;threshold=0)</a> |
| Avl9 (mmu) ⓘ    | mmu-miR-27a-3p ⓘ |    | 0.679<br><a href="#">(/DianaTools/index.php?r=microT_CDS/results&amp;keywords=mmu-miR-27a-3p%20ENSMUSG00000029787&amp;genes=ENSMUSG00000029787&amp;mirnas=mmu-miR-27a-3p&amp;threshold=0)</a> |
| Ube2k (mmu) ⓘ   | mmu-miR-27a-3p ⓘ |    | 0.677<br><a href="#">(/DianaTools/index.php?r=microT_CDS/results&amp;keywords=mmu-miR-27a-3p%20ENSMUSG00000029203&amp;genes=ENSMUSG00000029203&amp;mirnas=mmu-miR-27a-3p&amp;threshold=0)</a> |
| Stx12 (mmu) ⓘ   | mmu-miR-27a-3p ⓘ |    | 0.656<br><a href="#">(/DianaTools/index.php?r=microT_CDS/results&amp;keywords=mmu-miR-27a-3p%20ENSMUSG00000028879&amp;genes=ENSMUSG00000028879&amp;mirnas=mmu-miR-27a-3p&amp;threshold=0)</a> |
| Ccng2 (mmu) ⓘ   | mmu-miR-27a-3p ⓘ |    | 0.643<br><a href="#">(/DianaTools/index.php?r=microT_CDS/results&amp;keywords=mmu-miR-27a-3p%20ENSMUSG00000029385&amp;genes=ENSMUSG00000029385&amp;mirnas=mmu-miR-27a-3p&amp;threshold=0)</a> |
| Ccng2 (mmu) ⓘ   | mmu-miR-27a-3p ⓘ |    | 0.643<br><a href="#">(/DianaTools/index.php?r=microT_CDS/results&amp;keywords=mmu-miR-27a-3p%20ENSMUSG00000029385&amp;genes=ENSMUSG00000029385&amp;mirnas=mmu-miR-27a-3p&amp;threshold=0)</a> |
| N4bp2l2 (mmu) ⓘ | mmu-miR-27a-3p ⓘ |  | 0.627<br><a href="#">(/DianaTools/index.php?r=microT_CDS/results&amp;keywords=mmu-miR-27a-3p%20ENSMUSG00000029655&amp;genes=ENSMUSG00000029655&amp;mirnas=mmu-miR-27a-3p&amp;threshold=0)</a> |
| N4bp2l2 (mmu) ⓘ | mmu-miR-27a-3p ⓘ |  | 0.627<br><a href="#">(/DianaTools/index.php?r=microT_CDS/results&amp;keywords=mmu-miR-27a-3p%20ENSMUSG00000029655&amp;genes=ENSMUSG00000029655&amp;mirnas=mmu-miR-27a-3p&amp;threshold=0)</a> |
| Meaf6 (mmu) ⓘ   | mmu-miR-27a-3p ⓘ |  | 0.621<br><a href="#">(/DianaTools/index.php?r=microT_CDS/results&amp;keywords=mmu-miR-27a-3p%20ENSMUSG00000028863&amp;genes=ENSMUSG00000028863&amp;mirnas=mmu-miR-27a-3p&amp;threshold=0)</a> |
| Ociad2 (mmu) ⓘ  | mmu-miR-27a-3p ⓘ |  | 0.618<br><a href="#">(/DianaTools/index.php?r=microT_CDS/results&amp;keywords=mmu-miR-27a-3p%20ENSMUSG00000029153&amp;genes=ENSMUSG00000029153&amp;mirnas=mmu-miR-27a-3p&amp;threshold=0)</a> |

We have placed cookies on your device to help make this website and the services we offer better. By using this site, you agree to the use of cookies. [Learn more](#) ([/DianaTools/index.php?r=site/terms](#)).

I accept

|                 |                  |                                                                                      |                                                                                                                                                                                                                                                                                                                                                                                           |
|-----------------|------------------|--------------------------------------------------------------------------------------|-------------------------------------------------------------------------------------------------------------------------------------------------------------------------------------------------------------------------------------------------------------------------------------------------------------------------------------------------------------------------------------------|
| Nsg1 (mmu) ⓘ    | mmu-miR-27a-3p ⓘ |    | 0.615<br><a href="(/DianaTools/index.php?r=microT_CDS/results&amp;keywords=mmu-miR-27a-3p%20ENSMUSG00000029126&amp;genes=ENSMUSG00000029126&amp;mirnas=mmu-miR-27a-3p&amp;threshold=0)">(/DianaTools/index.php?<br/>r=microT_CDS/results&amp;keywords=mmu-<br/>miR-27a-<br/>3p%20ENSMUSG00000029126&amp;genes=ENSMUSG00000029126&amp;mirnas=mmu-<br/>miR-27a-<br/>3p&amp;threshold=0)</a> |
| Trim24 (mmu) ⓘ  | mmu-miR-27a-3p ⓘ |    | 0.592<br><a href="(/DianaTools/index.php?r=microT_CDS/results&amp;keywords=mmu-miR-27a-3p%20ENSMUSG00000029833&amp;genes=ENSMUSG00000029833&amp;mirnas=mmu-miR-27a-3p&amp;threshold=0)">(/DianaTools/index.php?<br/>r=microT_CDS/results&amp;keywords=mmu-<br/>miR-27a-<br/>3p%20ENSMUSG00000029833&amp;genes=ENSMUSG00000029833&amp;mirnas=mmu-<br/>miR-27a-<br/>3p&amp;threshold=0)</a> |
| Cln6 (mmu) ⓘ    | mmu-miR-27a-3p ⓘ |    | 0.591<br><a href="(/DianaTools/index.php?r=microT_CDS/results&amp;keywords=mmu-miR-27a-3p%20ENSMUSG00000029016&amp;genes=ENSMUSG00000029016&amp;mirnas=mmu-miR-27a-3p&amp;threshold=0)">(/DianaTools/index.php?<br/>r=microT_CDS/results&amp;keywords=mmu-<br/>miR-27a-<br/>3p%20ENSMUSG00000029016&amp;genes=ENSMUSG00000029016&amp;mirnas=mmu-<br/>miR-27a-<br/>3p&amp;threshold=0)</a> |
| Flt1 (mmu) ⓘ    | mmu-miR-27a-3p ⓘ |    | 0.587<br><a href="(/DianaTools/index.php?r=microT_CDS/results&amp;keywords=mmu-miR-27a-3p%20ENSMUSG00000029648&amp;genes=ENSMUSG00000029648&amp;mirnas=mmu-miR-27a-3p&amp;threshold=0)">(/DianaTools/index.php?<br/>r=microT_CDS/results&amp;keywords=mmu-<br/>miR-27a-<br/>3p%20ENSMUSG00000029648&amp;genes=ENSMUSG00000029648&amp;mirnas=mmu-<br/>miR-27a-<br/>3p&amp;threshold=0)</a> |
| Ran (mmu) ⓘ     | mmu-miR-27a-3p ⓘ |    | 0.579<br><a href="(/DianaTools/index.php?r=microT_CDS/results&amp;keywords=mmu-miR-27a-3p%20ENSMUSG00000029430&amp;genes=ENSMUSG00000029430&amp;mirnas=mmu-miR-27a-3p&amp;threshold=0)">(/DianaTools/index.php?<br/>r=microT_CDS/results&amp;keywords=mmu-<br/>miR-27a-<br/>3p%20ENSMUSG00000029430&amp;genes=ENSMUSG00000029430&amp;mirnas=mmu-<br/>miR-27a-<br/>3p&amp;threshold=0)</a> |
| Spp13 (mmu) ⓘ   | mmu-miR-27a-3p ⓘ |    | 0.578<br><a href="(/DianaTools/index.php?r=microT_CDS/results&amp;keywords=mmu-miR-27a-3p%20ENSMUSG00000029550&amp;genes=ENSMUSG00000029550&amp;mirnas=mmu-miR-27a-3p&amp;threshold=0)">(/DianaTools/index.php?<br/>r=microT_CDS/results&amp;keywords=mmu-<br/>miR-27a-<br/>3p%20ENSMUSG00000029550&amp;genes=ENSMUSG00000029550&amp;mirnas=mmu-<br/>miR-27a-<br/>3p&amp;threshold=0)</a> |
| Ago3 (mmu) ⓘ    | mmu-miR-27a-3p ⓘ |    | 0.576<br><a href="(/DianaTools/index.php?r=microT_CDS/results&amp;keywords=mmu-miR-27a-3p%20ENSMUSG00000028842&amp;genes=ENSMUSG00000028842&amp;mirnas=mmu-miR-27a-3p&amp;threshold=0)">(/DianaTools/index.php?<br/>r=microT_CDS/results&amp;keywords=mmu-<br/>miR-27a-<br/>3p%20ENSMUSG00000028842&amp;genes=ENSMUSG00000028842&amp;mirnas=mmu-<br/>miR-27a-<br/>3p&amp;threshold=0)</a> |
| Htt (mmu) ⓘ     | mmu-miR-27a-3p ⓘ |  | 0.564<br><a href="(/DianaTools/index.php?r=microT_CDS/results&amp;keywords=mmu-miR-27a-3p%20ENSMUSG00000029104&amp;genes=ENSMUSG00000029104&amp;mirnas=mmu-miR-27a-3p&amp;threshold=0)">(/DianaTools/index.php?<br/>r=microT_CDS/results&amp;keywords=mmu-<br/>miR-27a-<br/>3p%20ENSMUSG00000029104&amp;genes=ENSMUSG00000029104&amp;mirnas=mmu-<br/>miR-27a-<br/>3p&amp;threshold=0)</a> |
| Ugt2b34 (mmu) ⓘ | mmu-miR-27a-3p ⓘ |  | 0.549<br><a href="(/DianaTools/index.php?r=microT_CDS/results&amp;keywords=mmu-miR-27a-3p%20ENSMUSG00000029260&amp;genes=ENSMUSG00000029260&amp;mirnas=mmu-miR-27a-3p&amp;threshold=0)">(/DianaTools/index.php?<br/>r=microT_CDS/results&amp;keywords=mmu-<br/>miR-27a-<br/>3p%20ENSMUSG00000029260&amp;genes=ENSMUSG00000029260&amp;mirnas=mmu-<br/>miR-27a-<br/>3p&amp;threshold=0)</a> |
| Crmp1 (mmu) ⓘ   | mmu-miR-27a-3p ⓘ |  | 0.539<br><a href="(/DianaTools/index.php?r=microT_CDS/results&amp;keywords=mmu-miR-27a-3p%20ENSMUSG00000029121&amp;genes=ENSMUSG00000029121&amp;mirnas=mmu-miR-27a-3p&amp;threshold=0)">(/DianaTools/index.php?<br/>r=microT_CDS/results&amp;keywords=mmu-<br/>miR-27a-<br/>3p%20ENSMUSG00000029121&amp;genes=ENSMUSG00000029121&amp;mirnas=mmu-<br/>miR-27a-<br/>3p&amp;threshold=0)</a> |
| Cul1 (mmu) ⓘ    | mmu-miR-27a-3p ⓘ |  | 0.524<br><a href="(/DianaTools/index.php?r=microT_CDS/results&amp;keywords=mmu-miR-27a-3p%20ENSMUSG00000029686&amp;genes=ENSMUSG00000029686&amp;mirnas=mmu-miR-27a-3p&amp;threshold=0)">(/DianaTools/index.php?<br/>r=microT_CDS/results&amp;keywords=mmu-<br/>miR-27a-<br/>3p%20ENSMUSG00000029686&amp;genes=ENSMUSG00000029686&amp;mirnas=mmu-<br/>miR-27a-<br/>3p&amp;threshold=0)</a> |

We have placed cookies on your device to help make this website and the services we offer better. By using this site, you agree to the use of cookies. [Learn more](#) ([\(/DianaTools/index.php?r=site/terms\)]((/DianaTools/index.php?r=site/terms)))

I accept

|                 |                  |                                                                                      |                                                                                                                                                                                                                                                                                                                                                                                           |
|-----------------|------------------|--------------------------------------------------------------------------------------|-------------------------------------------------------------------------------------------------------------------------------------------------------------------------------------------------------------------------------------------------------------------------------------------------------------------------------------------------------------------------------------------|
| Cul1 (mmu) ⓘ    | mmu-miR-27a-3p ⓘ |    | 0.524<br><a href="(/DianaTools/index.php?r=microT_CDS/results&amp;keywords=mmu-miR-27a-3p%20ENSMUSG00000029686&amp;genes=ENSMUSG00000029686&amp;mirnas=mmu-miR-27a-3p&amp;threshold=0)">(/DianaTools/index.php?<br/>r=microT_CDS/results&amp;keywords=mmu-<br/>miR-27a-<br/>3p%20ENSMUSG00000029686&amp;genes=ENSMUSG00000029686&amp;mirnas=mmu-<br/>miR-27a-<br/>3p&amp;threshold=0)</a> |
| Afm (mmu) ⓘ     | mmu-miR-27a-3p ⓘ |    | 0.519<br><a href="(/DianaTools/index.php?r=microT_CDS/results&amp;keywords=mmu-miR-27a-3p%20ENSMUSG00000029369&amp;genes=ENSMUSG00000029369&amp;mirnas=mmu-miR-27a-3p&amp;threshold=0)">(/DianaTools/index.php?<br/>r=microT_CDS/results&amp;keywords=mmu-<br/>miR-27a-<br/>3p%20ENSMUSG00000029369&amp;genes=ENSMUSG00000029369&amp;mirnas=mmu-<br/>miR-27a-<br/>3p&amp;threshold=0)</a> |
| Tnfrsf9 (mmu) ⓘ | mmu-miR-27a-3p ⓘ |    | 0.518<br><a href="(/DianaTools/index.php?r=microT_CDS/results&amp;keywords=mmu-miR-27a-3p%20ENSMUSG00000028965&amp;genes=ENSMUSG00000028965&amp;mirnas=mmu-miR-27a-3p&amp;threshold=0)">(/DianaTools/index.php?<br/>r=microT_CDS/results&amp;keywords=mmu-<br/>miR-27a-<br/>3p%20ENSMUSG00000028965&amp;genes=ENSMUSG00000028965&amp;mirnas=mmu-<br/>miR-27a-<br/>3p&amp;threshold=0)</a> |
| Kmt2e (mmu) ⓘ   | mmu-miR-27a-3p ⓘ |    | 0.496<br><a href="(/DianaTools/index.php?r=microT_CDS/results&amp;keywords=mmu-miR-27a-3p%20ENSMUSG00000029004&amp;genes=ENSMUSG00000029004&amp;mirnas=mmu-miR-27a-3p&amp;threshold=0)">(/DianaTools/index.php?<br/>r=microT_CDS/results&amp;keywords=mmu-<br/>miR-27a-<br/>3p%20ENSMUSG00000029004&amp;genes=ENSMUSG00000029004&amp;mirnas=mmu-<br/>miR-27a-<br/>3p&amp;threshold=0)</a> |
| Usp12 (mmu) ⓘ   | mmu-miR-27a-3p ⓘ |    | 0.485<br><a href="(/DianaTools/index.php?r=microT_CDS/results&amp;keywords=mmu-miR-27a-3p%20ENSMUSG00000029640&amp;genes=ENSMUSG00000029640&amp;mirnas=mmu-miR-27a-3p&amp;threshold=0)">(/DianaTools/index.php?<br/>r=microT_CDS/results&amp;keywords=mmu-<br/>miR-27a-<br/>3p%20ENSMUSG00000029640&amp;genes=ENSMUSG00000029640&amp;mirnas=mmu-<br/>miR-27a-<br/>3p&amp;threshold=0)</a> |
| Rsrc2 (mmu) ⓘ   | mmu-miR-27a-3p ⓘ |    | 0.473<br><a href="(/DianaTools/index.php?r=microT_CDS/results&amp;keywords=mmu-miR-27a-3p%20ENSMUSG00000029422&amp;genes=ENSMUSG00000029422&amp;mirnas=mmu-miR-27a-3p&amp;threshold=0)">(/DianaTools/index.php?<br/>r=microT_CDS/results&amp;keywords=mmu-<br/>miR-27a-<br/>3p%20ENSMUSG00000029422&amp;genes=ENSMUSG00000029422&amp;mirnas=mmu-<br/>miR-27a-<br/>3p&amp;threshold=0)</a> |
| Chic2 (mmu) ⓘ   | mmu-miR-27a-3p ⓘ |   | 0.467<br><a href="(/DianaTools/index.php?r=microT_CDS/results&amp;keywords=mmu-miR-27a-3p%20ENSMUSG00000029229&amp;genes=ENSMUSG00000029229&amp;mirnas=mmu-miR-27a-3p&amp;threshold=0)">(/DianaTools/index.php?<br/>r=microT_CDS/results&amp;keywords=mmu-<br/>miR-27a-<br/>3p%20ENSMUSG00000029229&amp;genes=ENSMUSG00000029229&amp;mirnas=mmu-<br/>miR-27a-<br/>3p&amp;threshold=0)</a> |
| Chic2 (mmu) ⓘ   | mmu-miR-27a-3p ⓘ |  | 0.467<br><a href="(/DianaTools/index.php?r=microT_CDS/results&amp;keywords=mmu-miR-27a-3p%20ENSMUSG00000029229&amp;genes=ENSMUSG00000029229&amp;mirnas=mmu-miR-27a-3p&amp;threshold=0)">(/DianaTools/index.php?<br/>r=microT_CDS/results&amp;keywords=mmu-<br/>miR-27a-<br/>3p%20ENSMUSG00000029229&amp;genes=ENSMUSG00000029229&amp;mirnas=mmu-<br/>miR-27a-<br/>3p&amp;threshold=0)</a> |
| Tprgl (mmu) ⓘ   | mmu-miR-27a-3p ⓘ |  | 0.466<br><a href="(/DianaTools/index.php?r=microT_CDS/results&amp;keywords=mmu-miR-27a-3p%20ENSMUSG00000029030&amp;genes=ENSMUSG00000029030&amp;mirnas=mmu-miR-27a-3p&amp;threshold=0)">(/DianaTools/index.php?<br/>r=microT_CDS/results&amp;keywords=mmu-<br/>miR-27a-<br/>3p%20ENSMUSG00000029030&amp;genes=ENSMUSG00000029030&amp;mirnas=mmu-<br/>miR-27a-<br/>3p&amp;threshold=0)</a> |
| Tnfrsf4 (mmu) ⓘ | mmu-miR-27a-3p ⓘ |  | 0.459<br><a href="(/DianaTools/index.php?r=microT_CDS/results&amp;keywords=mmu-miR-27a-3p%20ENSMUSG00000029075&amp;genes=ENSMUSG00000029075&amp;mirnas=mmu-miR-27a-3p&amp;threshold=0)">(/DianaTools/index.php?<br/>r=microT_CDS/results&amp;keywords=mmu-<br/>miR-27a-<br/>3p%20ENSMUSG00000029075&amp;genes=ENSMUSG00000029075&amp;mirnas=mmu-<br/>miR-27a-<br/>3p&amp;threshold=0)</a> |
| Tes (mmu) ⓘ     | mmu-miR-27a-3p ⓘ |  | 0.455<br><a href="(/DianaTools/index.php?r=microT_CDS/results&amp;keywords=mmu-miR-27a-3p%20ENSMUSG00000029552&amp;genes=ENSMUSG00000029552&amp;mirnas=mmu-miR-27a-3p&amp;threshold=0)">(/DianaTools/index.php?<br/>r=microT_CDS/results&amp;keywords=mmu-<br/>miR-27a-<br/>3p%20ENSMUSG00000029552&amp;genes=ENSMUSG00000029552&amp;mirnas=mmu-<br/>miR-27a-<br/>3p&amp;threshold=0)</a> |

We have placed cookies on your device to help make this website and the services we offer better. By using this site, you agree to the use of cookies. [Learn more](#) ([\(/DianaTools/index.php?r=site/terms\)]((/DianaTools/index.php?r=site/terms)))

I accept

0.451  
 (/DianaTools/index.php?  
 r=miroT\_CDS/results&keywords=mmu-  
 miR-27a-  
 3p%20ENSMUSG00000029598&genes=ENSMUSG00000029598&mirnas=mmu-  
 miR-27a-  
 3p&threshold=0)

|                 |                  |    |   |
|-----------------|------------------|----|---|
| Pldb2 (mmu) ⓘ   | mmu-miR-27a-3p ⓘ | IP |   |
| Spp1 (mmu) ⓘ    | mmu-miR-27a-3p ⓘ | IP | - |
| Pxmp2 (mmu) ⓘ   | mmu-miR-27a-3p ⓘ | IP | - |
| G3bp2 (mmu) ⓘ   | mmu-miR-27a-3p ⓘ | IP | - |
| Pon3 (mmu) ⓘ    | mmu-miR-27a-3p ⓘ | IP | - |
| Pmpcb (mmu) ⓘ   | mmu-miR-27a-3p ⓘ | IP | - |
| Ephb6 (mmu) ⓘ   | mmu-miR-27a-3p ⓘ | IP | - |
| Cald1 (mmu) ⓘ   | mmu-miR-27a-3p ⓘ | IP | - |
| Clock (mmu) ⓘ   | mmu-miR-27a-3p ⓘ | IP | - |
| Tsc22d4 (mmu) ⓘ | mmu-miR-27a-3p ⓘ | IP | - |
| Mtor (mmu) ⓘ    | mmu-miR-27a-3p ⓘ | IP | - |
| Ube3b (mmu) ⓘ   | mmu-miR-27a-3p ⓘ | IP | - |
| Vps33a (mmu) ⓘ  | mmu-miR-27a-3p ⓘ | IP | - |
| Fam3c (mmu) ⓘ   | mmu-miR-27a-3p ⓘ | IP | - |
| Tmem57 (mmu) ⓘ  | mmu-miR-27a-3p ⓘ | IP | - |
| Sf3a3 (mmu) ⓘ   | mmu-miR-27a-3p ⓘ | IP | - |
| Ppp2r2c (mmu) ⓘ | mmu-miR-27a-3p ⓘ | IP | - |
| Cenpc1 (mmu) ⓘ  | mmu-miR-27a-3p ⓘ | IP | - |
| Slc13a4 (mmu) ⓘ | mmu-miR-27a-3p ⓘ | IP | - |
| Uso1 (mmu) ⓘ    | mmu-miR-27a-3p ⓘ | IP | - |
| Dync1i1 (mmu) ⓘ | mmu-miR-27a-3p ⓘ | IP | - |
| Nub1 (mmu) ⓘ    | mmu-miR-27a-3p ⓘ | IP | - |
| Ncdn (mmu) ⓘ    | mmu-miR-27a-3p ⓘ | IP | - |
| Ezh2 (mmu) ⓘ    | mmu-miR-27a-3p ⓘ | IP | - |
| Limk1 (mmu) ⓘ   | mmu-miR-27a-3p ⓘ | IP | - |
| Gbas (mmu) ⓘ    | mmu-miR-27a-3p ⓘ | IP | - |
| Mtf2 (mmu) ⓘ    | mmu-miR-27a-3p ⓘ | IP | - |
| Ablim2 (mmu) ⓘ  | mmu-miR-27a-3p ⓘ | IP | - |
| Casp9 (mmu) ⓘ   | mmu-miR-27a-3p ⓘ | IP | - |
| Eif2b4 (mmu) ⓘ  | mmu-miR-27a-3p ⓘ | IP | - |

We have placed cookies on your device to help make this website and the services we offer better. By using this site, you agree to the use of cookies. [Learn more](#) (/DianaTools/index.php?r=site/terms).

I accept

|                 |                  |    |                                                                                                                                                                                                                                                                                                                                                                |
|-----------------|------------------|----|----------------------------------------------------------------------------------------------------------------------------------------------------------------------------------------------------------------------------------------------------------------------------------------------------------------------------------------------------------------|
| Xrcc2 (mmu) ⓘ   | mmu-miR-27a-3p ⓘ | IP | -                                                                                                                                                                                                                                                                                                                                                              |
| Asphd2 (mmu) ⓘ  | mmu-miR-27a-3p ⓘ | IP | -                                                                                                                                                                                                                                                                                                                                                              |
| Ube2k (mmu) ⓘ   | mmu-miR-27a-3p ⓘ | IP | -                                                                                                                                                                                                                                                                                                                                                              |
| Slc37a3 (mmu) ⓘ | mmu-miR-27a-3p ⓘ | IP | -                                                                                                                                                                                                                                                                                                                                                              |
| Gstk1 (mmu) ⓘ   | mmu-miR-27a-3p ⓘ | IP | -                                                                                                                                                                                                                                                                                                                                                              |
| Rpa2 (mmu) ⓘ    | mmu-miR-27a-3p ⓘ | IP | -                                                                                                                                                                                                                                                                                                                                                              |
| Gnb1 (mmu) ⓘ    | mmu-miR-27a-3p ⓘ | IP | -                                                                                                                                                                                                                                                                                                                                                              |
| Scarb2 (mmu) ⓘ  | mmu-miR-27a-3p ⓘ | IP | -                                                                                                                                                                                                                                                                                                                                                              |
| Gars (mmu) ⓘ    | mmu-miR-27a-3p ⓘ | IP | -                                                                                                                                                                                                                                                                                                                                                              |
| Gars (mmu) ⓘ    | mmu-miR-27a-3p ⓘ | IP | -                                                                                                                                                                                                                                                                                                                                                              |
| Ccz1 (mmu) ⓘ    | mmu-miR-27a-3p ⓘ | IP | -                                                                                                                                                                                                                                                                                                                                                              |
| Wasf2 (mmu) ⓘ   | mmu-miR-27a-3p ⓘ | IP | -                                                                                                                                                                                                                                                                                                                                                              |
| Epb4.1 (mmu) ⓘ  | mmu-miR-27a-3p ⓘ | IP | -                                                                                                                                                                                                                                                                                                                                                              |
| Epb4.1 (mmu) ⓘ  | mmu-miR-27a-3p ⓘ | IP | -                                                                                                                                                                                                                                                                                                                                                              |
| Add1 (mmu) ⓘ    | mmu-miR-27a-3p ⓘ | IP | -                                                                                                                                                                                                                                                                                                                                                              |
| Klhl7 (mmu) ⓘ   | mmu-miR-27a-3p ⓘ | IP | -                                                                                                                                                                                                                                                                                                                                                              |
| Gm996 (mmu) ⓘ   | mmu-miR-27a-3p ⓘ | IP | -                                                                                                                                                                                                                                                                                                                                                              |
| Zkscan1 (mmu) ⓘ | mmu-miR-27a-3p ⓘ | IP | -                                                                                                                                                                                                                                                                                                                                                              |
| Cit (mmu) ⓘ     | mmu-miR-27a-3p ⓘ | IP | -                                                                                                                                                                                                                                                                                                                                                              |
| Ulk1 (mmu) ⓘ    | mmu-miR-27a-3p ⓘ | IP | -                                                                                                                                                                                                                                                                                                                                                              |
| Sorcs2 (mmu) ⓘ  | mmu-miR-27a-3p ⓘ | IP | -                                                                                                                                                                                                                                                                                                                                                              |
| Plixnd1 (mmu) ⓘ | mmu-miR-27a-3p ⓘ | IP | 0.996<br><a href="/DianaTools/index.php?r=microT_CDS/results&amp;keywords=mmu-miR-27a-3p%20ENSMUSG00000030123&amp;genes=ENSMUSG00000030123&amp;mirnas=mmu-miR-27a-3p&amp;threshold=0">(/DianaTools/index.php?r=microT_CDS/results&amp;keywords=mmu-miR-27a-3p%20ENSMUSG00000030123&amp;genes=ENSMUSG00000030123&amp;mirnas=mmu-miR-27a-3p&amp;threshold=0)</a> |
| Plixnd1 (mmu) ⓘ | mmu-miR-27a-3p ⓘ | IP | 0.996<br><a href="/DianaTools/index.php?r=microT_CDS/results&amp;keywords=mmu-miR-27a-3p%20ENSMUSG00000030123&amp;genes=ENSMUSG00000030123&amp;mirnas=mmu-miR-27a-3p&amp;threshold=0">(/DianaTools/index.php?r=microT_CDS/results&amp;keywords=mmu-miR-27a-3p%20ENSMUSG00000030123&amp;genes=ENSMUSG00000030123&amp;mirnas=mmu-miR-27a-3p&amp;threshold=0)</a> |
| Tmcc1 (mmu) ⓘ   | mmu-miR-27a-3p ⓘ | IP | 0.970<br><a href="/DianaTools/index.php?r=microT_CDS/results&amp;keywords=mmu-miR-27a-3p%20ENSMUSG00000030126&amp;genes=ENSMUSG00000030126&amp;mirnas=mmu-miR-27a-3p&amp;threshold=0">(/DianaTools/index.php?r=microT_CDS/results&amp;keywords=mmu-miR-27a-3p%20ENSMUSG00000030126&amp;genes=ENSMUSG00000030126&amp;mirnas=mmu-miR-27a-3p&amp;threshold=0)</a> |
| Srgap3 (mmu) ⓘ  | mmu-miR-27a-3p ⓘ | IP | 0.962<br><a href="/DianaTools/index.php?r=microT_CDS/results&amp;keywords=mmu-miR-27a-3p%20ENSMUSG00000030257&amp;genes=ENSMUSG00000030257&amp;mirnas=mmu-miR-27a-3p&amp;threshold=0">(/DianaTools/index.php?r=microT_CDS/results&amp;keywords=mmu-miR-27a-3p%20ENSMUSG00000030257&amp;genes=ENSMUSG00000030257&amp;mirnas=mmu-miR-27a-3p&amp;threshold=0)</a> |

We have placed cookies on your device to help make this website and the services we offer better. By using this site, you agree to the use of cookies. [Learn more](#) (</DianaTools/index.php?r=site/terms>).

I accept

|               |                  |                                                                                      |                                                                                                                                                                                    |
|---------------|------------------|--------------------------------------------------------------------------------------|------------------------------------------------------------------------------------------------------------------------------------------------------------------------------------|
| Rpn1 (mmu) ⓘ  | mmu-miR-27a-3p ⓘ |    | 0.941<br>(/DianaTools/index.php?<br>r=microT_CDS/results&keywords=mmu-<br>miR-27a-<br>3p%20ENSMUSG00000030062&genes=ENSMUSG00000030062&mirnas=mmu-<br>miR-27a-<br>3p&threshold=0). |
| Atrx (mmu) ⓘ  | mmu-miR-27a-3p ⓘ |    | 0.934<br>(/DianaTools/index.php?<br>r=microT_CDS/results&keywords=mmu-<br>miR-27a-<br>3p%20ENSMUSG00000031229&genes=ENSMUSG00000031229&mirnas=mmu-<br>miR-27a-<br>3p&threshold=0). |
| Fbx14 (mmu) ⓘ | mmu-miR-27a-3p ⓘ |    | 0.897<br>(/DianaTools/index.php?<br>r=microT_CDS/results&keywords=mmu-<br>miR-27a-<br>3p%20ENSMUSG00000030019&genes=ENSMUSG00000030019&mirnas=mmu-<br>miR-27a-<br>3p&threshold=0). |
| Msn (mmu) ⓘ   | mmu-miR-27a-3p ⓘ |    | 0.866<br>(/DianaTools/index.php?<br>r=microT_CDS/results&keywords=mmu-<br>miR-27a-<br>3p%20ENSMUSG00000031207&genes=ENSMUSG00000031207&mirnas=mmu-<br>miR-27a-<br>3p&threshold=0). |
| Msn (mmu) ⓘ   | mmu-miR-27a-3p ⓘ |    | 0.866<br>(/DianaTools/index.php?<br>r=microT_CDS/results&keywords=mmu-<br>miR-27a-<br>3p%20ENSMUSG00000031207&genes=ENSMUSG00000031207&mirnas=mmu-<br>miR-27a-<br>3p&threshold=0). |
| Magt1 (mmu) ⓘ | mmu-miR-27a-3p ⓘ |    | 0.843<br>(/DianaTools/index.php?<br>r=microT_CDS/results&keywords=mmu-<br>miR-27a-<br>3p%20ENSMUSG00000031232&genes=ENSMUSG00000031232&mirnas=mmu-<br>miR-27a-<br>3p&threshold=0). |
| Pdha1 (mmu) ⓘ | mmu-miR-27a-3p ⓘ |   | 0.818<br>(/DianaTools/index.php?<br>r=microT_CDS/results&keywords=mmu-<br>miR-27a-<br>3p%20ENSMUSG00000031299&genes=ENSMUSG00000031299&mirnas=mmu-<br>miR-27a-<br>3p&threshold=0). |
| Pde3b (mmu) ⓘ | mmu-miR-27a-3p ⓘ |  | 0.804<br>(/DianaTools/index.php?<br>r=microT_CDS/results&keywords=mmu-<br>miR-27a-<br>3p%20ENSMUSG00000030671&genes=ENSMUSG00000030671&mirnas=mmu-<br>miR-27a-<br>3p&threshold=0). |
| Pde3b (mmu) ⓘ | mmu-miR-27a-3p ⓘ |  | 0.804<br>(/DianaTools/index.php?<br>r=microT_CDS/results&keywords=mmu-<br>miR-27a-<br>3p%20ENSMUSG00000030671&genes=ENSMUSG00000030671&mirnas=mmu-<br>miR-27a-<br>3p&threshold=0). |
| Edem1 (mmu) ⓘ | mmu-miR-27a-3p ⓘ |  | 0.792<br>(/DianaTools/index.php?<br>r=microT_CDS/results&keywords=mmu-<br>miR-27a-<br>3p%20ENSMUSG00000030104&genes=ENSMUSG00000030104&mirnas=mmu-<br>miR-27a-<br>3p&threshold=0). |
| Edem1 (mmu) ⓘ | mmu-miR-27a-3p ⓘ |  | 0.792<br>(/DianaTools/index.php?<br>r=microT_CDS/results&keywords=mmu-<br>miR-27a-<br>3p%20ENSMUSG00000030104&genes=ENSMUSG00000030104&mirnas=mmu-<br>miR-27a-<br>3p&threshold=0). |

We have placed cookies on your device to help make this website and the services we offer better. By using this site, you agree to the use of cookies. [Learn more](#) ([/DianaTools/index.php?r=site/terms](#)).

I accept

|                 |                  |                                                                                      |                                                                                                                                                                                                                                                                                                                                                                         |
|-----------------|------------------|--------------------------------------------------------------------------------------|-------------------------------------------------------------------------------------------------------------------------------------------------------------------------------------------------------------------------------------------------------------------------------------------------------------------------------------------------------------------------|
| Agpat5 (mmu) ⓘ  | mmu-miR-27a-3p ⓘ |    | <p>0.774<br/> <a href="/DianaTools/index.php?r=microT_CDS/results&amp;keywords=mmu-miR-27a-3p%20ENSMUSG00000031467&amp;genes=ENSMUSG00000031467&amp;mirnas=mmu-miR-27a-3p&amp;threshold=0">(/DianaTools/index.php?r=microT_CDS/results&amp;keywords=mmu-miR-27a-3p%20ENSMUSG00000031467&amp;genes=ENSMUSG00000031467&amp;mirnas=mmu-miR-27a-3p&amp;threshold=0)</a></p> |
| Ipo5 (mmu) ⓘ    | mmu-miR-27a-3p ⓘ |    | <p>0.771<br/> <a href="/DianaTools/index.php?r=microT_CDS/results&amp;keywords=mmu-miR-27a-3p%20ENSMUSG00000030662&amp;genes=ENSMUSG00000030662&amp;mirnas=mmu-miR-27a-3p&amp;threshold=0">(/DianaTools/index.php?r=microT_CDS/results&amp;keywords=mmu-miR-27a-3p%20ENSMUSG00000030662&amp;genes=ENSMUSG00000030662&amp;mirnas=mmu-miR-27a-3p&amp;threshold=0)</a></p> |
| Rnf141 (mmu) ⓘ  | mmu-miR-27a-3p ⓘ |    | <p>0.767<br/> <a href="/DianaTools/index.php?r=microT_CDS/results&amp;keywords=mmu-miR-27a-3p%20ENSMUSG00000030788&amp;genes=ENSMUSG00000030788&amp;mirnas=mmu-miR-27a-3p&amp;threshold=0">(/DianaTools/index.php?r=microT_CDS/results&amp;keywords=mmu-miR-27a-3p%20ENSMUSG00000030788&amp;genes=ENSMUSG00000030788&amp;mirnas=mmu-miR-27a-3p&amp;threshold=0)</a></p> |
| Arl6ip1 (mmu) ⓘ | mmu-miR-27a-3p ⓘ |    | <p>0.755<br/> <a href="/DianaTools/index.php?r=microT_CDS/results&amp;keywords=mmu-miR-27a-3p%20ENSMUSG00000030654&amp;genes=ENSMUSG00000030654&amp;mirnas=mmu-miR-27a-3p&amp;threshold=0">(/DianaTools/index.php?r=microT_CDS/results&amp;keywords=mmu-miR-27a-3p%20ENSMUSG00000030654&amp;genes=ENSMUSG00000030654&amp;mirnas=mmu-miR-27a-3p&amp;threshold=0)</a></p> |
| Arl6ip1 (mmu) ⓘ | mmu-miR-27a-3p ⓘ |    | <p>0.755<br/> <a href="/DianaTools/index.php?r=microT_CDS/results&amp;keywords=mmu-miR-27a-3p%20ENSMUSG00000030654&amp;genes=ENSMUSG00000030654&amp;mirnas=mmu-miR-27a-3p&amp;threshold=0">(/DianaTools/index.php?r=microT_CDS/results&amp;keywords=mmu-miR-27a-3p%20ENSMUSG00000030654&amp;genes=ENSMUSG00000030654&amp;mirnas=mmu-miR-27a-3p&amp;threshold=0)</a></p> |
| Necap1 (mmu) ⓘ  | mmu-miR-27a-3p ⓘ |    | <p>0.746<br/> <a href="/DianaTools/index.php?r=microT_CDS/results&amp;keywords=mmu-miR-27a-3p%20ENSMUSG00000030327&amp;genes=ENSMUSG00000030327&amp;mirnas=mmu-miR-27a-3p&amp;threshold=0">(/DianaTools/index.php?r=microT_CDS/results&amp;keywords=mmu-miR-27a-3p%20ENSMUSG00000030327&amp;genes=ENSMUSG00000030327&amp;mirnas=mmu-miR-27a-3p&amp;threshold=0)</a></p> |
| Ppp4c (mmu) ⓘ   | mmu-miR-27a-3p ⓘ |    | <p>0.737<br/> <a href="/DianaTools/index.php?r=microT_CDS/results&amp;keywords=mmu-miR-27a-3p%20ENSMUSG00000030697&amp;genes=ENSMUSG00000030697&amp;mirnas=mmu-miR-27a-3p&amp;threshold=0">(/DianaTools/index.php?r=microT_CDS/results&amp;keywords=mmu-miR-27a-3p%20ENSMUSG00000030697&amp;genes=ENSMUSG00000030697&amp;mirnas=mmu-miR-27a-3p&amp;threshold=0)</a></p> |
| Dera (mmu) ⓘ    | mmu-miR-27a-3p ⓘ |  | <p>0.733<br/> <a href="/DianaTools/index.php?r=microT_CDS/results&amp;keywords=mmu-miR-27a-3p%20ENSMUSG00000030225&amp;genes=ENSMUSG00000030225&amp;mirnas=mmu-miR-27a-3p&amp;threshold=0">(/DianaTools/index.php?r=microT_CDS/results&amp;keywords=mmu-miR-27a-3p%20ENSMUSG00000030225&amp;genes=ENSMUSG00000030225&amp;mirnas=mmu-miR-27a-3p&amp;threshold=0)</a></p> |
| Arl8b (mmu) ⓘ   | mmu-miR-27a-3p ⓘ |  | <p>0.729<br/> <a href="/DianaTools/index.php?r=microT_CDS/results&amp;keywords=mmu-miR-27a-3p%20ENSMUSG00000030105&amp;genes=ENSMUSG00000030105&amp;mirnas=mmu-miR-27a-3p&amp;threshold=0">(/DianaTools/index.php?r=microT_CDS/results&amp;keywords=mmu-miR-27a-3p%20ENSMUSG00000030105&amp;genes=ENSMUSG00000030105&amp;mirnas=mmu-miR-27a-3p&amp;threshold=0)</a></p> |
| Arl8b (mmu) ⓘ   | mmu-miR-27a-3p ⓘ |  | <p>0.729<br/> <a href="/DianaTools/index.php?r=microT_CDS/results&amp;keywords=mmu-miR-27a-3p%20ENSMUSG00000030105&amp;genes=ENSMUSG00000030105&amp;mirnas=mmu-miR-27a-3p&amp;threshold=0">(/DianaTools/index.php?r=microT_CDS/results&amp;keywords=mmu-miR-27a-3p%20ENSMUSG00000030105&amp;genes=ENSMUSG00000030105&amp;mirnas=mmu-miR-27a-3p&amp;threshold=0)</a></p> |
| Slc6a6 (mmu) ⓘ  | mmu-miR-27a-3p ⓘ |  | <p>0.684<br/> <a href="/DianaTools/index.php?r=microT_CDS/results&amp;keywords=mmu-miR-27a-3p%20ENSMUSG00000030096&amp;genes=ENSMUSG00000030096&amp;mirnas=mmu-miR-27a-3p&amp;threshold=0">(/DianaTools/index.php?r=microT_CDS/results&amp;keywords=mmu-miR-27a-3p%20ENSMUSG00000030096&amp;genes=ENSMUSG00000030096&amp;mirnas=mmu-miR-27a-3p&amp;threshold=0)</a></p> |

We have placed cookies on your device to help make this website and the services we offer better. By using this site, you agree to the use of cookies. [Learn more \(/DianaTools/index.php?r=site/terms\)](/DianaTools/index.php?r=site/terms)

I accept

|                 |                  |                                                                                      |                                                                                                                                                                                                                                                                                                                                                                           |
|-----------------|------------------|--------------------------------------------------------------------------------------|---------------------------------------------------------------------------------------------------------------------------------------------------------------------------------------------------------------------------------------------------------------------------------------------------------------------------------------------------------------------------|
| Smg1 (mmu) ⓘ    | mmu-miR-27a-3p ⓘ |    | <p>0.673<br/> <a href="(/DianaTools/index.php?r=microT_CDS/results&amp;keywords=mmu-miR-27a-3p%20ENSMUSG00000030655&amp;genes=ENSMUSG00000030655&amp;mirnas=mmu-miR-27a-3p&amp;threshold=0)">(/DianaTools/index.php?r=microT_CDS/results&amp;keywords=mmu-miR-27a-3p%20ENSMUSG00000030655&amp;genes=ENSMUSG00000030655&amp;mirnas=mmu-miR-27a-3p&amp;threshold=0)</a></p> |
| Ankrd10 (mmu) ⓘ | mmu-miR-27a-3p ⓘ |    | <p>0.646<br/> <a href="(/DianaTools/index.php?r=microT_CDS/results&amp;keywords=mmu-miR-27a-3p%20ENSMUSG00000031508&amp;genes=ENSMUSG00000031508&amp;mirnas=mmu-miR-27a-3p&amp;threshold=0)">(/DianaTools/index.php?r=microT_CDS/results&amp;keywords=mmu-miR-27a-3p%20ENSMUSG00000031508&amp;genes=ENSMUSG00000031508&amp;mirnas=mmu-miR-27a-3p&amp;threshold=0)</a></p> |
| Pole4 (mmu) ⓘ   | mmu-miR-27a-3p ⓘ |    | <p>0.638<br/> <a href="(/DianaTools/index.php?r=microT_CDS/results&amp;keywords=mmu-miR-27a-3p%20ENSMUSG00000030042&amp;genes=ENSMUSG00000030042&amp;mirnas=mmu-miR-27a-3p&amp;threshold=0)">(/DianaTools/index.php?r=microT_CDS/results&amp;keywords=mmu-miR-27a-3p%20ENSMUSG00000030042&amp;genes=ENSMUSG00000030042&amp;mirnas=mmu-miR-27a-3p&amp;threshold=0)</a></p> |
| Pole4 (mmu) ⓘ   | mmu-miR-27a-3p ⓘ |    | <p>0.638<br/> <a href="(/DianaTools/index.php?r=microT_CDS/results&amp;keywords=mmu-miR-27a-3p%20ENSMUSG00000030042&amp;genes=ENSMUSG00000030042&amp;mirnas=mmu-miR-27a-3p&amp;threshold=0)">(/DianaTools/index.php?r=microT_CDS/results&amp;keywords=mmu-miR-27a-3p%20ENSMUSG00000030042&amp;genes=ENSMUSG00000030042&amp;mirnas=mmu-miR-27a-3p&amp;threshold=0)</a></p> |
| Cd27 (mmu) ⓘ    | mmu-miR-27a-3p ⓘ |    | <p>0.638<br/> <a href="(/DianaTools/index.php?r=microT_CDS/results&amp;keywords=mmu-miR-27a-3p%20ENSMUSG00000030336&amp;genes=ENSMUSG00000030336&amp;mirnas=mmu-miR-27a-3p&amp;threshold=0)">(/DianaTools/index.php?r=microT_CDS/results&amp;keywords=mmu-miR-27a-3p%20ENSMUSG00000030336&amp;genes=ENSMUSG00000030336&amp;mirnas=mmu-miR-27a-3p&amp;threshold=0)</a></p> |
| Etnk1 (mmu) ⓘ   | mmu-miR-27a-3p ⓘ |    | <p>0.634<br/> <a href="(/DianaTools/index.php?r=microT_CDS/results&amp;keywords=mmu-miR-27a-3p%20ENSMUSG00000030275&amp;genes=ENSMUSG00000030275&amp;mirnas=mmu-miR-27a-3p&amp;threshold=0)">(/DianaTools/index.php?r=microT_CDS/results&amp;keywords=mmu-miR-27a-3p%20ENSMUSG00000030275&amp;genes=ENSMUSG00000030275&amp;mirnas=mmu-miR-27a-3p&amp;threshold=0)</a></p> |
| Etnk1 (mmu) ⓘ   | mmu-miR-27a-3p ⓘ |   | <p>0.634<br/> <a href="(/DianaTools/index.php?r=microT_CDS/results&amp;keywords=mmu-miR-27a-3p%20ENSMUSG00000030275&amp;genes=ENSMUSG00000030275&amp;mirnas=mmu-miR-27a-3p&amp;threshold=0)">(/DianaTools/index.php?r=microT_CDS/results&amp;keywords=mmu-miR-27a-3p%20ENSMUSG00000030275&amp;genes=ENSMUSG00000030275&amp;mirnas=mmu-miR-27a-3p&amp;threshold=0)</a></p> |
| Tpp1 (mmu) ⓘ    | mmu-miR-27a-3p ⓘ |  | <p>0.593<br/> <a href="(/DianaTools/index.php?r=microT_CDS/results&amp;keywords=mmu-miR-27a-3p%20ENSMUSG00000030894&amp;genes=ENSMUSG00000030894&amp;mirnas=mmu-miR-27a-3p&amp;threshold=0)">(/DianaTools/index.php?r=microT_CDS/results&amp;keywords=mmu-miR-27a-3p%20ENSMUSG00000030894&amp;genes=ENSMUSG00000030894&amp;mirnas=mmu-miR-27a-3p&amp;threshold=0)</a></p> |
| Syp (mmu) ⓘ     | mmu-miR-27a-3p ⓘ |  | <p>0.585<br/> <a href="(/DianaTools/index.php?r=microT_CDS/results&amp;keywords=mmu-miR-27a-3p%20ENSMUSG00000031144&amp;genes=ENSMUSG00000031144&amp;mirnas=mmu-miR-27a-3p&amp;threshold=0)">(/DianaTools/index.php?r=microT_CDS/results&amp;keywords=mmu-miR-27a-3p%20ENSMUSG00000031144&amp;genes=ENSMUSG00000031144&amp;mirnas=mmu-miR-27a-3p&amp;threshold=0)</a></p> |
| Cd69 (mmu) ⓘ    | mmu-miR-27a-3p ⓘ |  | <p>0.578<br/> <a href="(/DianaTools/index.php?r=microT_CDS/results&amp;keywords=mmu-miR-27a-3p%20ENSMUSG00000030156&amp;genes=ENSMUSG00000030156&amp;mirnas=mmu-miR-27a-3p&amp;threshold=0)">(/DianaTools/index.php?r=microT_CDS/results&amp;keywords=mmu-miR-27a-3p%20ENSMUSG00000030156&amp;genes=ENSMUSG00000030156&amp;mirnas=mmu-miR-27a-3p&amp;threshold=0)</a></p> |
| Mef2a (mmu) ⓘ   | mmu-miR-27a-3p ⓘ |  | <p>0.567<br/> <a href="(/DianaTools/index.php?r=microT_CDS/results&amp;keywords=mmu-miR-27a-3p%20ENSMUSG00000030557&amp;genes=ENSMUSG00000030557&amp;mirnas=mmu-miR-27a-3p&amp;threshold=0)">(/DianaTools/index.php?r=microT_CDS/results&amp;keywords=mmu-miR-27a-3p%20ENSMUSG00000030557&amp;genes=ENSMUSG00000030557&amp;mirnas=mmu-miR-27a-3p&amp;threshold=0)</a></p> |

We have placed cookies on your device to help make this website and the services we offer better. By using this site, you agree to the use of cookies. [Learn more](#) ([\(/DianaTools/index.php?r=site/terms\)]((/DianaTools/index.php?r=site/terms))).

I accept



|                |                  |                                                                                      |                                                                                                                                                                                                                                                                                                                                                                  |
|----------------|------------------|--------------------------------------------------------------------------------------|------------------------------------------------------------------------------------------------------------------------------------------------------------------------------------------------------------------------------------------------------------------------------------------------------------------------------------------------------------------|
| Rasa3 (mmu) ⓘ  | mmu-miR-27a-3p ⓘ |    | 0.563<br><a href="(/DianaTools/index.php?r=microT_CDS/results&amp;keywords=mmu-miR-27a-3p%20ENSMUSG00000031453&amp;genes=ENSMUSG00000031453&amp;mirnas=mmu-miR-27a-3p&amp;threshold=0)">(/DianaTools/index.php?r=microT_CDS/results&amp;keywords=mmu-miR-27a-3p%20ENSMUSG00000031453&amp;genes=ENSMUSG00000031453&amp;mirnas=mmu-miR-27a-3p&amp;threshold=0)</a> |
| Rasa3 (mmu) ⓘ  | mmu-miR-27a-3p ⓘ |    | 0.563<br><a href="(/DianaTools/index.php?r=microT_CDS/results&amp;keywords=mmu-miR-27a-3p%20ENSMUSG00000031453&amp;genes=ENSMUSG00000031453&amp;mirnas=mmu-miR-27a-3p&amp;threshold=0)">(/DianaTools/index.php?r=microT_CDS/results&amp;keywords=mmu-miR-27a-3p%20ENSMUSG00000031453&amp;genes=ENSMUSG00000031453&amp;mirnas=mmu-miR-27a-3p&amp;threshold=0)</a> |
| Ubfd1 (mmu) ⓘ  | mmu-miR-27a-3p ⓘ |    | 0.554<br><a href="(/DianaTools/index.php?r=microT_CDS/results&amp;keywords=mmu-miR-27a-3p%20ENSMUSG00000030870&amp;genes=ENSMUSG00000030870&amp;mirnas=mmu-miR-27a-3p&amp;threshold=0)">(/DianaTools/index.php?r=microT_CDS/results&amp;keywords=mmu-miR-27a-3p%20ENSMUSG00000030870&amp;genes=ENSMUSG00000030870&amp;mirnas=mmu-miR-27a-3p&amp;threshold=0)</a> |
| Ubfd1 (mmu) ⓘ  | mmu-miR-27a-3p ⓘ |    | 0.554<br><a href="(/DianaTools/index.php?r=microT_CDS/results&amp;keywords=mmu-miR-27a-3p%20ENSMUSG00000030870&amp;genes=ENSMUSG00000030870&amp;mirnas=mmu-miR-27a-3p&amp;threshold=0)">(/DianaTools/index.php?r=microT_CDS/results&amp;keywords=mmu-miR-27a-3p%20ENSMUSG00000030870&amp;genes=ENSMUSG00000030870&amp;mirnas=mmu-miR-27a-3p&amp;threshold=0)</a> |
| Prkrir (mmu) ⓘ | mmu-miR-27a-3p ⓘ |    | 0.541<br><a href="(/DianaTools/index.php?r=microT_CDS/results&amp;keywords=mmu-miR-27a-3p%20ENSMUSG00000030753&amp;genes=ENSMUSG00000030753&amp;mirnas=mmu-miR-27a-3p&amp;threshold=0)">(/DianaTools/index.php?r=microT_CDS/results&amp;keywords=mmu-miR-27a-3p%20ENSMUSG00000030753&amp;genes=ENSMUSG00000030753&amp;mirnas=mmu-miR-27a-3p&amp;threshold=0)</a> |
| Gpr165 (mmu) ⓘ | mmu-miR-27a-3p ⓘ |    | 0.521<br><a href="(/DianaTools/index.php?r=microT_CDS/results&amp;keywords=mmu-miR-27a-3p%20ENSMUSG00000031210&amp;genes=ENSMUSG00000031210&amp;mirnas=mmu-miR-27a-3p&amp;threshold=0)">(/DianaTools/index.php?r=microT_CDS/results&amp;keywords=mmu-miR-27a-3p%20ENSMUSG00000031210&amp;genes=ENSMUSG00000031210&amp;mirnas=mmu-miR-27a-3p&amp;threshold=0)</a> |
| Vbp1 (mmu) ⓘ   | mmu-miR-27a-3p ⓘ |   | 0.515<br><a href="(/DianaTools/index.php?r=microT_CDS/results&amp;keywords=mmu-miR-27a-3p%20ENSMUSG00000031197&amp;genes=ENSMUSG00000031197&amp;mirnas=mmu-miR-27a-3p&amp;threshold=0)">(/DianaTools/index.php?r=microT_CDS/results&amp;keywords=mmu-miR-27a-3p%20ENSMUSG00000031197&amp;genes=ENSMUSG00000031197&amp;mirnas=mmu-miR-27a-3p&amp;threshold=0)</a> |
| Itm2a (mmu) ⓘ  | mmu-miR-27a-3p ⓘ |  | 0.513<br><a href="(/DianaTools/index.php?r=microT_CDS/results&amp;keywords=mmu-miR-27a-3p%20ENSMUSG00000031239&amp;genes=ENSMUSG00000031239&amp;mirnas=mmu-miR-27a-3p&amp;threshold=0)">(/DianaTools/index.php?r=microT_CDS/results&amp;keywords=mmu-miR-27a-3p%20ENSMUSG00000031239&amp;genes=ENSMUSG00000031239&amp;mirnas=mmu-miR-27a-3p&amp;threshold=0)</a> |
| Plp1 (mmu) ⓘ   | mmu-miR-27a-3p ⓘ |  | 0.499<br><a href="(/DianaTools/index.php?r=microT_CDS/results&amp;keywords=mmu-miR-27a-3p%20ENSMUSG00000031425&amp;genes=ENSMUSG00000031425&amp;mirnas=mmu-miR-27a-3p&amp;threshold=0)">(/DianaTools/index.php?r=microT_CDS/results&amp;keywords=mmu-miR-27a-3p%20ENSMUSG00000031425&amp;genes=ENSMUSG00000031425&amp;mirnas=mmu-miR-27a-3p&amp;threshold=0)</a> |
| Ddx47 (mmu) ⓘ  | mmu-miR-27a-3p ⓘ |  | 0.498<br><a href="(/DianaTools/index.php?r=microT_CDS/results&amp;keywords=mmu-miR-27a-3p%20ENSMUSG00000030204&amp;genes=ENSMUSG00000030204&amp;mirnas=mmu-miR-27a-3p&amp;threshold=0)">(/DianaTools/index.php?r=microT_CDS/results&amp;keywords=mmu-miR-27a-3p%20ENSMUSG00000030204&amp;genes=ENSMUSG00000030204&amp;mirnas=mmu-miR-27a-3p&amp;threshold=0)</a> |
| Nup210 (mmu) ⓘ | mmu-miR-27a-3p ⓘ |  | 0.498<br><a href="(/DianaTools/index.php?r=microT_CDS/results&amp;keywords=mmu-miR-27a-3p%20ENSMUSG00000030091&amp;genes=ENSMUSG00000030091&amp;mirnas=mmu-miR-27a-3p&amp;threshold=0)">(/DianaTools/index.php?r=microT_CDS/results&amp;keywords=mmu-miR-27a-3p%20ENSMUSG00000030091&amp;genes=ENSMUSG00000030091&amp;mirnas=mmu-miR-27a-3p&amp;threshold=0)</a> |

We have placed cookies on your device to help make this website and the services we offer better. By using this site, you agree to the use of cookies. [Learn more]((/DianaTools/index.php?r=site/terms)) ([/DianaTools/index.php?r=site/terms]((/DianaTools/index.php?r=site/terms))).

I accept

|                 |                  |                                                                                      |                                                                                                                                                                                                                                                                                                                                                                  |
|-----------------|------------------|--------------------------------------------------------------------------------------|------------------------------------------------------------------------------------------------------------------------------------------------------------------------------------------------------------------------------------------------------------------------------------------------------------------------------------------------------------------|
| Dhx32 (mmu) ⓘ   | mmu-miR-27a-3p ⓘ |    | 0.493<br><a href="(/DianaTools/index.php?r=microT_CDS/results&amp;keywords=mmu-miR-27a-3p%20ENSMUSG00000030986&amp;genes=ENSMUSG00000030986&amp;mirnas=mmu-miR-27a-3p&amp;threshold=0)">(/DianaTools/index.php?r=microT_CDS/results&amp;keywords=mmu-miR-27a-3p%20ENSMUSG00000030986&amp;genes=ENSMUSG00000030986&amp;mirnas=mmu-miR-27a-3p&amp;threshold=0)</a> |
| Ttyh1 (mmu) ⓘ   | mmu-miR-27a-3p ⓘ |    | 0.480<br><a href="(/DianaTools/index.php?r=microT_CDS/results&amp;keywords=mmu-miR-27a-3p%20ENSMUSG00000030428&amp;genes=ENSMUSG00000030428&amp;mirnas=mmu-miR-27a-3p&amp;threshold=0)">(/DianaTools/index.php?r=microT_CDS/results&amp;keywords=mmu-miR-27a-3p%20ENSMUSG00000030428&amp;genes=ENSMUSG00000030428&amp;mirnas=mmu-miR-27a-3p&amp;threshold=0)</a> |
| Col4a1 (mmu) ⓘ  | mmu-miR-27a-3p ⓘ |    | 0.479<br><a href="(/DianaTools/index.php?r=microT_CDS/results&amp;keywords=mmu-miR-27a-3p%20ENSMUSG00000031502&amp;genes=ENSMUSG00000031502&amp;mirnas=mmu-miR-27a-3p&amp;threshold=0)">(/DianaTools/index.php?r=microT_CDS/results&amp;keywords=mmu-miR-27a-3p%20ENSMUSG00000031502&amp;genes=ENSMUSG00000031502&amp;mirnas=mmu-miR-27a-3p&amp;threshold=0)</a> |
| Herc2 (mmu) ⓘ   | mmu-miR-27a-3p ⓘ |    | 0.477<br><a href="(/DianaTools/index.php?r=microT_CDS/results&amp;keywords=mmu-miR-27a-3p%20ENSMUSG00000030451&amp;genes=ENSMUSG00000030451&amp;mirnas=mmu-miR-27a-3p&amp;threshold=0)">(/DianaTools/index.php?r=microT_CDS/results&amp;keywords=mmu-miR-27a-3p%20ENSMUSG00000030451&amp;genes=ENSMUSG00000030451&amp;mirnas=mmu-miR-27a-3p&amp;threshold=0)</a> |
| Atp6ap2 (mmu) ⓘ | mmu-miR-27a-3p ⓘ |    | 0.475<br><a href="(/DianaTools/index.php?r=microT_CDS/results&amp;keywords=mmu-miR-27a-3p%20ENSMUSG00000031007&amp;genes=ENSMUSG00000031007&amp;mirnas=mmu-miR-27a-3p&amp;threshold=0)">(/DianaTools/index.php?r=microT_CDS/results&amp;keywords=mmu-miR-27a-3p%20ENSMUSG00000031007&amp;genes=ENSMUSG00000031007&amp;mirnas=mmu-miR-27a-3p&amp;threshold=0)</a> |
| Atp6ap2 (mmu) ⓘ | mmu-miR-27a-3p ⓘ |    | 0.475<br><a href="(/DianaTools/index.php?r=microT_CDS/results&amp;keywords=mmu-miR-27a-3p%20ENSMUSG00000031007&amp;genes=ENSMUSG00000031007&amp;mirnas=mmu-miR-27a-3p&amp;threshold=0)">(/DianaTools/index.php?r=microT_CDS/results&amp;keywords=mmu-miR-27a-3p%20ENSMUSG00000031007&amp;genes=ENSMUSG00000031007&amp;mirnas=mmu-miR-27a-3p&amp;threshold=0)</a> |
| Ndufc2 (mmu) ⓘ  | mmu-miR-27a-3p ⓘ |    | 0.473<br><a href="(/DianaTools/index.php?r=microT_CDS/results&amp;keywords=mmu-miR-27a-3p%20ENSMUSG00000030647&amp;genes=ENSMUSG00000030647&amp;mirnas=mmu-miR-27a-3p&amp;threshold=0)">(/DianaTools/index.php?r=microT_CDS/results&amp;keywords=mmu-miR-27a-3p%20ENSMUSG00000030647&amp;genes=ENSMUSG00000030647&amp;mirnas=mmu-miR-27a-3p&amp;threshold=0)</a> |
| Grin2b (mmu) ⓘ  | mmu-miR-27a-3p ⓘ |  | 0.467<br><a href="(/DianaTools/index.php?r=microT_CDS/results&amp;keywords=mmu-miR-27a-3p%20ENSMUSG00000030209&amp;genes=ENSMUSG00000030209&amp;mirnas=mmu-miR-27a-3p&amp;threshold=0)">(/DianaTools/index.php?r=microT_CDS/results&amp;keywords=mmu-miR-27a-3p%20ENSMUSG00000030209&amp;genes=ENSMUSG00000030209&amp;mirnas=mmu-miR-27a-3p&amp;threshold=0)</a> |
| Lrig1 (mmu) ⓘ   | mmu-miR-27a-3p ⓘ |  | 0.458<br><a href="(/DianaTools/index.php?r=microT_CDS/results&amp;keywords=mmu-miR-27a-3p%20ENSMUSG00000030029&amp;genes=ENSMUSG00000030029&amp;mirnas=mmu-miR-27a-3p&amp;threshold=0)">(/DianaTools/index.php?r=microT_CDS/results&amp;keywords=mmu-miR-27a-3p%20ENSMUSG00000030029&amp;genes=ENSMUSG00000030029&amp;mirnas=mmu-miR-27a-3p&amp;threshold=0)</a> |
| Rps6ka3 (mmu) ⓘ | mmu-miR-27a-3p ⓘ |  | 0.458<br><a href="(/DianaTools/index.php?r=microT_CDS/results&amp;keywords=mmu-miR-27a-3p%20ENSMUSG00000031309&amp;genes=ENSMUSG00000031309&amp;mirnas=mmu-miR-27a-3p&amp;threshold=0)">(/DianaTools/index.php?r=microT_CDS/results&amp;keywords=mmu-miR-27a-3p%20ENSMUSG00000031309&amp;genes=ENSMUSG00000031309&amp;mirnas=mmu-miR-27a-3p&amp;threshold=0)</a> |
| Pzp (mmu) ⓘ     | mmu-miR-27a-3p ⓘ |  | -                                                                                                                                                                                                                                                                                                                                                                |
| Blm (mmu) ⓘ     | mmu-miR-27a-3p ⓘ |  | -                                                                                                                                                                                                                                                                                                                                                                |
| Cul4a (mmu) ⓘ   | mmu-miR-27a-3p ⓘ |  | -                                                                                                                                                                                                                                                                                                                                                                |

We have placed cookies on your device to help make this website and the services we offer better. By using this site, you agree to the use of cookies. [Learn more](#) ([/DianaTools/index.php?r=site/terms]((/DianaTools/index.php?r=site/terms))).

I accept

|                  |                  |    |   |
|------------------|------------------|----|---|
| C2cd5 (mmu) ⓘ    | mmu-miR-27a-3p ⓘ | IP | - |
| Asb7 (mmu) ⓘ     | mmu-miR-27a-3p ⓘ | IP | - |
| Ankrd10 (mmu) ⓘ  | mmu-miR-27a-3p ⓘ | IP | - |
| Pde2a (mmu) ⓘ    | mmu-miR-27a-3p ⓘ | IP | - |
| Ltbr (mmu) ⓘ     | mmu-miR-27a-3p ⓘ | IP | - |
| Pgm211 (mmu) ⓘ   | mmu-miR-27a-3p ⓘ | IP | - |
| Thumpd1 (mmu) ⓘ  | mmu-miR-27a-3p ⓘ | IP | - |
| Thumpd1 (mmu) ⓘ  | mmu-miR-27a-3p ⓘ | IP | - |
| Pik3c2a (mmu) ⓘ  | mmu-miR-27a-3p ⓘ | IP | - |
| Eif3c (mmu) ⓘ    | mmu-miR-27a-3p ⓘ | IP | - |
| Tmem9b (mmu) ⓘ   | mmu-miR-27a-3p ⓘ | IP | - |
| Itp1 (mmu) ⓘ     | mmu-miR-27a-3p ⓘ | IP | - |
| Nsmce1 (mmu) ⓘ   | mmu-miR-27a-3p ⓘ | IP | - |
| Rbbp7 (mmu) ⓘ    | mmu-miR-27a-3p ⓘ | IP | - |
| Aldh11l1 (mmu) ⓘ | mmu-miR-27a-3p ⓘ | IP | - |
| Srgap3 (mmu) ⓘ   | mmu-miR-27a-3p ⓘ | IP | - |
| Vasp (mmu) ⓘ     | mmu-miR-27a-3p ⓘ | IP | - |
| Rbbp6 (mmu) ⓘ    | mmu-miR-27a-3p ⓘ | IP | - |
| Rbbp6 (mmu) ⓘ    | mmu-miR-27a-3p ⓘ | IP | - |
| Crel1 (mmu) ⓘ    | mmu-miR-27a-3p ⓘ | IP | - |
| Ttyh1 (mmu) ⓘ    | mmu-miR-27a-3p ⓘ | IP | - |
| Mki67 (mmu) ⓘ    | mmu-miR-27a-3p ⓘ | IP | - |
| Cct7 (mmu) ⓘ     | mmu-miR-27a-3p ⓘ | IP | - |
| Magt1 (mmu) ⓘ    | mmu-miR-27a-3p ⓘ | IP | - |
| Rrm1 (mmu) ⓘ     | mmu-miR-27a-3p ⓘ | IP | - |
| Zfp273 (mmu) ⓘ   | mmu-miR-27a-3p ⓘ | IP | - |
| Ap1s2 (mmu) ⓘ    | mmu-miR-27a-3p ⓘ | IP | - |
| Kdm5a (mmu) ⓘ    | mmu-miR-27a-3p ⓘ | IP | - |
| Dennd5b (mmu) ⓘ  | mmu-miR-27a-3p ⓘ | IP | - |
| Phka2 (mmu) ⓘ    | mmu-miR-27a-3p ⓘ | IP | - |
| Pak1 (mmu) ⓘ     | mmu-miR-27a-3p ⓘ | IP | - |
| Slc6a1 (mmu) ⓘ   | mmu-miR-27a-3p ⓘ | IP | - |

We have placed cookies on your device to help make this website and the services we offer better. By using this site, you agree to the use of cookies. [Learn more \(/DianaTools/index.php?r=site/terms\)](#).

I accept

|                  |                  |    |                                                                                                                                                                                               |
|------------------|------------------|----|-----------------------------------------------------------------------------------------------------------------------------------------------------------------------------------------------|
| Aldoa (mmu) ⓘ    | mmu-miR-27a-3p ⓘ | IP | -                                                                                                                                                                                             |
| Tub (mmu) ⓘ      | mmu-miR-27a-3p ⓘ | IP | -                                                                                                                                                                                             |
| Ptms (mmu) ⓘ     | mmu-miR-27a-3p ⓘ | IP | -                                                                                                                                                                                             |
| Chl1 (mmu) ⓘ     | mmu-miR-27a-3p ⓘ | IP | -                                                                                                                                                                                             |
| Tjp1 (mmu) ⓘ     | mmu-miR-27a-3p ⓘ | IP | -                                                                                                                                                                                             |
| Dkk3 (mmu) ⓘ     | mmu-miR-27a-3p ⓘ | IP | -                                                                                                                                                                                             |
| Nsdhl (mmu) ⓘ    | mmu-miR-27a-3p ⓘ | IP | -                                                                                                                                                                                             |
| Sfrp1 (mmu) ⓘ    | mmu-miR-27a-3p ⓘ | IP | 0.998<br><a href="#">(/DianaTools/index.php?r=microT_CDS/results&amp;keywords=mmu-miR-27a-3p%20ENSMUSG00000031548&amp;genes=ENSMUSG00000031548&amp;mirnas=mmu-miR-27a-3p&amp;threshold=0)</a> |
| Dnajc13 (mmu) ⓘ  | mmu-miR-27a-3p ⓘ | IP | 0.991<br><a href="#">(/DianaTools/index.php?r=microT_CDS/results&amp;keywords=mmu-miR-27a-3p%20ENSMUSG00000032560&amp;genes=ENSMUSG00000032560&amp;mirnas=mmu-miR-27a-3p&amp;threshold=0)</a> |
| Sh3bgrl2 (mmu) ⓘ | mmu-miR-27a-3p ⓘ | IP | 0.987<br><a href="#">(/DianaTools/index.php?r=microT_CDS/results&amp;keywords=mmu-miR-27a-3p%20ENSMUSG00000032261&amp;genes=ENSMUSG00000032261&amp;mirnas=mmu-miR-27a-3p&amp;threshold=0)</a> |
| Cdh5 (mmu) ⓘ     | mmu-miR-27a-3p ⓘ | IP | 0.982<br><a href="#">(/DianaTools/index.php?r=microT_CDS/results&amp;keywords=mmu-miR-27a-3p%20ENSMUSG00000031871&amp;genes=ENSMUSG00000031871&amp;mirnas=mmu-miR-27a-3p&amp;threshold=0)</a> |
| Nedd4 (mmu) ⓘ    | mmu-miR-27a-3p ⓘ | IP | 0.978<br><a href="#">(/DianaTools/index.php?r=microT_CDS/results&amp;keywords=mmu-miR-27a-3p%20ENSMUSG00000032216&amp;genes=ENSMUSG00000032216&amp;mirnas=mmu-miR-27a-3p&amp;threshold=0)</a> |
| Rora (mmu) ⓘ     | mmu-miR-27a-3p ⓘ | IP | 0.964<br><a href="#">(/DianaTools/index.php?r=microT_CDS/results&amp;keywords=mmu-miR-27a-3p%20ENSMUSG00000032238&amp;genes=ENSMUSG00000032238&amp;mirnas=mmu-miR-27a-3p&amp;threshold=0)</a> |
| Gse1 (mmu) ⓘ     | mmu-miR-27a-3p ⓘ | IP | 0.963<br><a href="#">(/DianaTools/index.php?r=microT_CDS/results&amp;keywords=mmu-miR-27a-3p%20ENSMUSG00000031822&amp;genes=ENSMUSG00000031822&amp;mirnas=mmu-miR-27a-3p&amp;threshold=0)</a> |
| Cnot7 (mmu) ⓘ    | mmu-miR-27a-3p ⓘ | IP | 0.945<br><a href="#">(/DianaTools/index.php?r=microT_CDS/results&amp;keywords=mmu-miR-27a-3p%20ENSMUSG00000031601&amp;genes=ENSMUSG00000031601&amp;mirnas=mmu-miR-27a-3p&amp;threshold=0)</a> |

We have placed cookies on your device to help make this website and the services we offer better. By using this site, you agree to the use of cookies. [Learn more](#) ([/DianaTools/index.php?r=site/terms](#)).

I accept

|                 |                  |                                                                                      |                                                                                                                                                                                                                                                                                                                                                                  |
|-----------------|------------------|--------------------------------------------------------------------------------------|------------------------------------------------------------------------------------------------------------------------------------------------------------------------------------------------------------------------------------------------------------------------------------------------------------------------------------------------------------------|
| Phlpp2 (mmu) ⓘ  | mmu-miR-27a-3p ⓘ |    | 0.940<br><a href="(/DianaTools/index.php?r=microT_CDS/results&amp;keywords=mmu-miR-27a-3p%20ENSMUSG00000031732&amp;genes=ENSMUSG00000031732&amp;mirnas=mmu-miR-27a-3p&amp;threshold=0)">(/DianaTools/index.php?r=microT_CDS/results&amp;keywords=mmu-miR-27a-3p%20ENSMUSG00000031732&amp;genes=ENSMUSG00000031732&amp;mirnas=mmu-miR-27a-3p&amp;threshold=0)</a> |
| Oaf (mmu) ⓘ     | mmu-miR-27a-3p ⓘ |    | 0.924<br><a href="(/DianaTools/index.php?r=microT_CDS/results&amp;keywords=mmu-miR-27a-3p%20ENSMUSG00000032014&amp;genes=ENSMUSG00000032014&amp;mirnas=mmu-miR-27a-3p&amp;threshold=0)">(/DianaTools/index.php?r=microT_CDS/results&amp;keywords=mmu-miR-27a-3p%20ENSMUSG00000032014&amp;genes=ENSMUSG00000032014&amp;mirnas=mmu-miR-27a-3p&amp;threshold=0)</a> |
| Rnf111 (mmu) ⓘ  | mmu-miR-27a-3p ⓘ |    | 0.907<br><a href="(/DianaTools/index.php?r=microT_CDS/results&amp;keywords=mmu-miR-27a-3p%20ENSMUSG00000032217&amp;genes=ENSMUSG00000032217&amp;mirnas=mmu-miR-27a-3p&amp;threshold=0)">(/DianaTools/index.php?r=microT_CDS/results&amp;keywords=mmu-miR-27a-3p%20ENSMUSG00000032217&amp;genes=ENSMUSG00000032217&amp;mirnas=mmu-miR-27a-3p&amp;threshold=0)</a> |
| Csrnp1 (mmu) ⓘ  | mmu-miR-27a-3p ⓘ |    | 0.888<br><a href="(/DianaTools/index.php?r=microT_CDS/results&amp;keywords=mmu-miR-27a-3p%20ENSMUSG00000032515&amp;genes=ENSMUSG00000032515&amp;mirnas=mmu-miR-27a-3p&amp;threshold=0)">(/DianaTools/index.php?r=microT_CDS/results&amp;keywords=mmu-miR-27a-3p%20ENSMUSG00000032515&amp;genes=ENSMUSG00000032515&amp;mirnas=mmu-miR-27a-3p&amp;threshold=0)</a> |
| Csnk1g1 (mmu) ⓘ | mmu-miR-27a-3p ⓘ |    | 0.885<br><a href="(/DianaTools/index.php?r=microT_CDS/results&amp;keywords=mmu-miR-27a-3p%20ENSMUSG00000032384&amp;genes=ENSMUSG00000032384&amp;mirnas=mmu-miR-27a-3p&amp;threshold=0)">(/DianaTools/index.php?r=microT_CDS/results&amp;keywords=mmu-miR-27a-3p%20ENSMUSG00000032384&amp;genes=ENSMUSG00000032384&amp;mirnas=mmu-miR-27a-3p&amp;threshold=0)</a> |
| Nptn (mmu) ⓘ    | mmu-miR-27a-3p ⓘ |    | 0.883<br><a href="(/DianaTools/index.php?r=microT_CDS/results&amp;keywords=mmu-miR-27a-3p%20ENSMUSG00000032336&amp;genes=ENSMUSG00000032336&amp;mirnas=mmu-miR-27a-3p&amp;threshold=0)">(/DianaTools/index.php?r=microT_CDS/results&amp;keywords=mmu-miR-27a-3p%20ENSMUSG00000032336&amp;genes=ENSMUSG00000032336&amp;mirnas=mmu-miR-27a-3p&amp;threshold=0)</a> |
| Nck1 (mmu) ⓘ    | mmu-miR-27a-3p ⓘ |   | 0.865<br><a href="(/DianaTools/index.php?r=microT_CDS/results&amp;keywords=mmu-miR-27a-3p%20ENSMUSG00000032475&amp;genes=ENSMUSG00000032475&amp;mirnas=mmu-miR-27a-3p&amp;threshold=0)">(/DianaTools/index.php?r=microT_CDS/results&amp;keywords=mmu-miR-27a-3p%20ENSMUSG00000032475&amp;genes=ENSMUSG00000032475&amp;mirnas=mmu-miR-27a-3p&amp;threshold=0)</a> |
| Bsn (mmu) ⓘ     | mmu-miR-27a-3p ⓘ |  | 0.837<br><a href="(/DianaTools/index.php?r=microT_CDS/results&amp;keywords=mmu-miR-27a-3p%20ENSMUSG00000032589&amp;genes=ENSMUSG00000032589&amp;mirnas=mmu-miR-27a-3p&amp;threshold=0)">(/DianaTools/index.php?r=microT_CDS/results&amp;keywords=mmu-miR-27a-3p%20ENSMUSG00000032589&amp;genes=ENSMUSG00000032589&amp;mirnas=mmu-miR-27a-3p&amp;threshold=0)</a> |
| Gab1 (mmu) ⓘ    | mmu-miR-27a-3p ⓘ |  | 0.804<br><a href="(/DianaTools/index.php?r=microT_CDS/results&amp;keywords=mmu-miR-27a-3p%20ENSMUSG00000031714&amp;genes=ENSMUSG00000031714&amp;mirnas=mmu-miR-27a-3p&amp;threshold=0)">(/DianaTools/index.php?r=microT_CDS/results&amp;keywords=mmu-miR-27a-3p%20ENSMUSG00000031714&amp;genes=ENSMUSG00000031714&amp;mirnas=mmu-miR-27a-3p&amp;threshold=0)</a> |
| Vps35 (mmu) ⓘ   | mmu-miR-27a-3p ⓘ |  | 0.783<br><a href="(/DianaTools/index.php?r=microT_CDS/results&amp;keywords=mmu-miR-27a-3p%20ENSMUSG00000031696&amp;genes=ENSMUSG00000031696&amp;mirnas=mmu-miR-27a-3p&amp;threshold=0)">(/DianaTools/index.php?r=microT_CDS/results&amp;keywords=mmu-miR-27a-3p%20ENSMUSG00000031696&amp;genes=ENSMUSG00000031696&amp;mirnas=mmu-miR-27a-3p&amp;threshold=0)</a> |
| Vps35 (mmu) ⓘ   | mmu-miR-27a-3p ⓘ |  | 0.783<br><a href="(/DianaTools/index.php?r=microT_CDS/results&amp;keywords=mmu-miR-27a-3p%20ENSMUSG00000031696&amp;genes=ENSMUSG00000031696&amp;mirnas=mmu-miR-27a-3p&amp;threshold=0)">(/DianaTools/index.php?r=microT_CDS/results&amp;keywords=mmu-miR-27a-3p%20ENSMUSG00000031696&amp;genes=ENSMUSG00000031696&amp;mirnas=mmu-miR-27a-3p&amp;threshold=0)</a> |

We have placed cookies on your device to help make this website and the services we offer better. By using this site, you agree to the use of cookies. [Learn more](#) ([\(/DianaTools/index.php?r=site/terms\)]((/DianaTools/index.php?r=site/terms))).

I accept

|                |                  |    |                                                                                                                                                                                  |
|----------------|------------------|----|----------------------------------------------------------------------------------------------------------------------------------------------------------------------------------|
| Ednra (mmu) ⓘ  | mmu-miR-27a-3p ⓘ | IP | 0.704<br>(/DianaTools/index.php?<br>r=miroT_CDS/results&keywords=mmu-<br>miR-27a-<br>3p%20ENSMUSG00000031616&genes=ENSMUSG00000031616&mirnas=mmu-<br>miR-27a-<br>3p&threshold=0) |
| Ldlr (mmu) ⓘ   | mmu-miR-27a-3p ⓘ | IP | 0.695<br>(/DianaTools/index.php?<br>r=miroT_CDS/results&keywords=mmu-<br>miR-27a-<br>3p%20ENSMUSG00000032193&genes=ENSMUSG00000032193&mirnas=mmu-<br>miR-27a-<br>3p&threshold=0) |
| Gpt2 (mmu) ⓘ   | mmu-miR-27a-3p ⓘ | IP | 0.680<br>(/DianaTools/index.php?<br>r=miroT_CDS/results&keywords=mmu-<br>miR-27a-<br>3p%20ENSMUSG00000031700&genes=ENSMUSG00000031700&mirnas=mmu-<br>miR-27a-<br>3p&threshold=0) |
| Cx3cl1 (mmu) ⓘ | mmu-miR-27a-3p ⓘ | IP | 0.679<br>(/DianaTools/index.php?<br>r=miroT_CDS/results&keywords=mmu-<br>miR-27a-<br>3p%20ENSMUSG00000031778&genes=ENSMUSG00000031778&mirnas=mmu-<br>miR-27a-<br>3p&threshold=0) |
| Tnks (mmu) ⓘ   | mmu-miR-27a-3p ⓘ | IP | 0.672<br>(/DianaTools/index.php?<br>r=miroT_CDS/results&keywords=mmu-<br>miR-27a-<br>3p%20ENSMUSG00000031529&genes=ENSMUSG00000031529&mirnas=mmu-<br>miR-27a-<br>3p&threshold=0) |
| Tnks (mmu) ⓘ   | mmu-miR-27a-3p ⓘ | IP | 0.672<br>(/DianaTools/index.php?<br>r=miroT_CDS/results&keywords=mmu-<br>miR-27a-<br>3p%20ENSMUSG00000031529&genes=ENSMUSG00000031529&mirnas=mmu-<br>miR-27a-<br>3p&threshold=0) |
| Pcm1 (mmu) ⓘ   | mmu-miR-27a-3p ⓘ | IP | 0.665<br>(/DianaTools/index.php?<br>r=miroT_CDS/results&keywords=mmu-<br>miR-27a-<br>3p%20ENSMUSG00000031592&genes=ENSMUSG00000031592&mirnas=mmu-<br>miR-27a-<br>3p&threshold=0) |
| Pcm1 (mmu) ⓘ   | mmu-miR-27a-3p ⓘ | IP | 0.665<br>(/DianaTools/index.php?<br>r=miroT_CDS/results&keywords=mmu-<br>miR-27a-<br>3p%20ENSMUSG00000031592&genes=ENSMUSG00000031592&mirnas=mmu-<br>miR-27a-<br>3p&threshold=0) |
| Slc7a2 (mmu) ⓘ | mmu-miR-27a-3p ⓘ | IP | 0.663<br>(/DianaTools/index.php?<br>r=miroT_CDS/results&keywords=mmu-<br>miR-27a-<br>3p%20ENSMUSG00000031596&genes=ENSMUSG00000031596&mirnas=mmu-<br>miR-27a-<br>3p&threshold=0) |
| Gpm6a (mmu) ⓘ  | mmu-miR-27a-3p ⓘ | IP | 0.653<br>(/DianaTools/index.php?<br>r=miroT_CDS/results&keywords=mmu-<br>miR-27a-<br>3p%20ENSMUSG00000031517&genes=ENSMUSG00000031517<br>miR-27a-<br>3p&threshold=0)             |
| Deb1 (mmu) ⓘ   | mmu-miR-27a-3p ⓘ | IP | 0.650<br>(/DianaTools/index.php?<br>r=miroT_CDS/results&keywords=mmu-<br>miR-27a-<br>3p%20ENSMUSG00000032526&genes=ENSMUSG00000032526&mirnas=mmu-<br>miR-27a-<br>3p&threshold=0) |

We have placed cookies on your device to help make this website and the services we offer better. By using this site, you agree to the use of cookies. [Learn more](#) (/DianaTools/index.php?r=site/terms)

I accept

|               |                  |                                                                                      |                                                                                                                                                                                                                                                                                                                                                                                           |
|---------------|------------------|--------------------------------------------------------------------------------------|-------------------------------------------------------------------------------------------------------------------------------------------------------------------------------------------------------------------------------------------------------------------------------------------------------------------------------------------------------------------------------------------|
| Cenpn (mmu) ⓘ | mmu-miR-27a-3p ⓘ |    | 0.639<br><a href="(/DianaTools/index.php?r=microT_CDS/results&amp;keywords=mmu-miR-27a-3p%20ENSMUSG00000031756&amp;genes=ENSMUSG00000031756&amp;mirnas=mmu-miR-27a-3p&amp;threshold=0)">(/DianaTools/index.php?<br/>r=microT_CDS/results&amp;keywords=mmu-<br/>miR-27a-<br/>3p%20ENSMUSG00000031756&amp;genes=ENSMUSG00000031756&amp;mirnas=mmu-<br/>miR-27a-<br/>3p&amp;threshold=0)</a> |
| Klh2 (mmu) ⓘ  | mmu-miR-27a-3p ⓘ |    | 0.629<br><a href="(/DianaTools/index.php?r=microT_CDS/results&amp;keywords=mmu-miR-27a-3p%20ENSMUSG00000031605&amp;genes=ENSMUSG00000031605&amp;mirnas=mmu-miR-27a-3p&amp;threshold=0)">(/DianaTools/index.php?<br/>r=microT_CDS/results&amp;keywords=mmu-<br/>miR-27a-<br/>3p%20ENSMUSG00000031605&amp;genes=ENSMUSG00000031605&amp;mirnas=mmu-<br/>miR-27a-<br/>3p&amp;threshold=0)</a> |
| Klh2 (mmu) ⓘ  | mmu-miR-27a-3p ⓘ |    | 0.629<br><a href="(/DianaTools/index.php?r=microT_CDS/results&amp;keywords=mmu-miR-27a-3p%20ENSMUSG00000031605&amp;genes=ENSMUSG00000031605&amp;mirnas=mmu-miR-27a-3p&amp;threshold=0)">(/DianaTools/index.php?<br/>r=microT_CDS/results&amp;keywords=mmu-<br/>miR-27a-<br/>3p%20ENSMUSG00000031605&amp;genes=ENSMUSG00000031605&amp;mirnas=mmu-<br/>miR-27a-<br/>3p&amp;threshold=0)</a> |
| Rfx1 (mmu) ⓘ  | mmu-miR-27a-3p ⓘ |    | 0.614<br><a href="(/DianaTools/index.php?r=microT_CDS/results&amp;keywords=mmu-miR-27a-3p%20ENSMUSG00000031706&amp;genes=ENSMUSG00000031706&amp;mirnas=mmu-miR-27a-3p&amp;threshold=0)">(/DianaTools/index.php?<br/>r=microT_CDS/results&amp;keywords=mmu-<br/>miR-27a-<br/>3p%20ENSMUSG00000031706&amp;genes=ENSMUSG00000031706&amp;mirnas=mmu-<br/>miR-27a-<br/>3p&amp;threshold=0)</a> |
| Rasa2 (mmu) ⓘ | mmu-miR-27a-3p ⓘ |    | 0.609<br><a href="(/DianaTools/index.php?r=microT_CDS/results&amp;keywords=mmu-miR-27a-3p%20ENSMUSG00000032413&amp;genes=ENSMUSG00000032413&amp;mirnas=mmu-miR-27a-3p&amp;threshold=0)">(/DianaTools/index.php?<br/>r=microT_CDS/results&amp;keywords=mmu-<br/>miR-27a-<br/>3p%20ENSMUSG00000032413&amp;genes=ENSMUSG00000032413&amp;mirnas=mmu-<br/>miR-27a-<br/>3p&amp;threshold=0)</a> |
| Rasa2 (mmu) ⓘ | mmu-miR-27a-3p ⓘ |    | 0.609<br><a href="(/DianaTools/index.php?r=microT_CDS/results&amp;keywords=mmu-miR-27a-3p%20ENSMUSG00000032413&amp;genes=ENSMUSG00000032413&amp;mirnas=mmu-miR-27a-3p&amp;threshold=0)">(/DianaTools/index.php?<br/>r=microT_CDS/results&amp;keywords=mmu-<br/>miR-27a-<br/>3p%20ENSMUSG00000032413&amp;genes=ENSMUSG00000032413&amp;mirnas=mmu-<br/>miR-27a-<br/>3p&amp;threshold=0)</a> |
| Map4 (mmu) ⓘ  | mmu-miR-27a-3p ⓘ |    | 0.585<br><a href="(/DianaTools/index.php?r=microT_CDS/results&amp;keywords=mmu-miR-27a-3p%20ENSMUSG00000032479&amp;genes=ENSMUSG00000032479&amp;mirnas=mmu-miR-27a-3p&amp;threshold=0)">(/DianaTools/index.php?<br/>r=microT_CDS/results&amp;keywords=mmu-<br/>miR-27a-<br/>3p%20ENSMUSG00000032479&amp;genes=ENSMUSG00000032479&amp;mirnas=mmu-<br/>miR-27a-<br/>3p&amp;threshold=0)</a> |
| Fem1b (mmu) ⓘ | mmu-miR-27a-3p ⓘ |  | 0.578<br><a href="(/DianaTools/index.php?r=microT_CDS/results&amp;keywords=mmu-miR-27a-3p%20ENSMUSG00000032244&amp;genes=ENSMUSG00000032244&amp;mirnas=mmu-miR-27a-3p&amp;threshold=0)">(/DianaTools/index.php?<br/>r=microT_CDS/results&amp;keywords=mmu-<br/>miR-27a-<br/>3p%20ENSMUSG00000032244&amp;genes=ENSMUSG00000032244&amp;mirnas=mmu-<br/>miR-27a-<br/>3p&amp;threshold=0)</a> |
| Cntm6 (mmu) ⓘ | mmu-miR-27a-3p ⓘ |  | 0.576<br><a href="(/DianaTools/index.php?r=microT_CDS/results&amp;keywords=mmu-miR-27a-3p%20ENSMUSG00000032434&amp;genes=ENSMUSG00000032434&amp;mirnas=mmu-miR-27a-3p&amp;threshold=0)">(/DianaTools/index.php?<br/>r=microT_CDS/results&amp;keywords=mmu-<br/>miR-27a-<br/>3p%20ENSMUSG00000032434&amp;genes=ENSMUSG00000032434&amp;mirnas=mmu-<br/>miR-27a-<br/>3p&amp;threshold=0)</a> |
| Manf (mmu) ⓘ  | mmu-miR-27a-3p ⓘ |  | 0.563<br><a href="(/DianaTools/index.php?r=microT_CDS/results&amp;keywords=mmu-miR-27a-3p%20ENSMUSG00000032575&amp;genes=ENSMUSG00000032575&amp;mirnas=mmu-miR-27a-3p&amp;threshold=0)">(/DianaTools/index.php?<br/>r=microT_CDS/results&amp;keywords=mmu-<br/>miR-27a-<br/>3p%20ENSMUSG00000032575&amp;genes=ENSMUSG00000032575&amp;mirnas=mmu-<br/>miR-27a-<br/>3p&amp;threshold=0)</a> |
| Med17 (mmu) ⓘ | mmu-miR-27a-3p ⓘ |  | 0.526<br><a href="(/DianaTools/index.php?r=microT_CDS/results&amp;keywords=mmu-miR-27a-3p%20ENSMUSG00000031935&amp;genes=ENSMUSG00000031935&amp;mirnas=mmu-miR-27a-3p&amp;threshold=0)">(/DianaTools/index.php?<br/>r=microT_CDS/results&amp;keywords=mmu-<br/>miR-27a-<br/>3p%20ENSMUSG00000031935&amp;genes=ENSMUSG00000031935&amp;mirnas=mmu-<br/>miR-27a-<br/>3p&amp;threshold=0)</a> |

We have placed cookies on your device to help make this website and the services we offer better. By using this site, you agree to the use of cookies. [Learn more](#) ([\(/DianaTools/index.php?r=site/terms\)]((/DianaTools/index.php?r=site/terms))).

I accept

|                 |                  |                                                                                      |                                                                                                                                                                                                                                                                                                                                                                                           |
|-----------------|------------------|--------------------------------------------------------------------------------------|-------------------------------------------------------------------------------------------------------------------------------------------------------------------------------------------------------------------------------------------------------------------------------------------------------------------------------------------------------------------------------------------|
| Snx19 (mmu) ⓘ   | mmu-miR-27a-3p ⓘ |    | 0.525<br><a href="(/DianaTools/index.php?r=microT_CDS/results&amp;keywords=mmu-miR-27a-3p%20ENSMUSG00000031993&amp;genes=ENSMUSG00000031993&amp;mirnas=mmu-miR-27a-3p&amp;threshold=0)">(/DianaTools/index.php?<br/>r=microT_CDS/results&amp;keywords=mmu-<br/>miR-27a-<br/>3p%20ENSMUSG00000031993&amp;genes=ENSMUSG00000031993&amp;mirnas=mmu-<br/>miR-27a-<br/>3p&amp;threshold=0)</a> |
| Tmem170 (mmu) ⓘ | mmu-miR-27a-3p ⓘ |    | 0.520<br><a href="(/DianaTools/index.php?r=microT_CDS/results&amp;keywords=mmu-miR-27a-3p%20ENSMUSG00000031953&amp;genes=ENSMUSG00000031953&amp;mirnas=mmu-miR-27a-3p&amp;threshold=0)">(/DianaTools/index.php?<br/>r=microT_CDS/results&amp;keywords=mmu-<br/>miR-27a-<br/>3p%20ENSMUSG00000031953&amp;genes=ENSMUSG00000031953&amp;mirnas=mmu-<br/>miR-27a-<br/>3p&amp;threshold=0)</a> |
| Nktr (mmu) ⓘ    | mmu-miR-27a-3p ⓘ |    | 0.515<br><a href="(/DianaTools/index.php?r=microT_CDS/results&amp;keywords=mmu-miR-27a-3p%20ENSMUSG00000032525&amp;genes=ENSMUSG00000032525&amp;mirnas=mmu-miR-27a-3p&amp;threshold=0)">(/DianaTools/index.php?<br/>r=microT_CDS/results&amp;keywords=mmu-<br/>miR-27a-<br/>3p%20ENSMUSG00000032525&amp;genes=ENSMUSG00000032525&amp;mirnas=mmu-<br/>miR-27a-<br/>3p&amp;threshold=0)</a> |
| Nktr (mmu) ⓘ    | mmu-miR-27a-3p ⓘ |    | 0.515<br><a href="(/DianaTools/index.php?r=microT_CDS/results&amp;keywords=mmu-miR-27a-3p%20ENSMUSG00000032525&amp;genes=ENSMUSG00000032525&amp;mirnas=mmu-miR-27a-3p&amp;threshold=0)">(/DianaTools/index.php?<br/>r=microT_CDS/results&amp;keywords=mmu-<br/>miR-27a-<br/>3p%20ENSMUSG00000032525&amp;genes=ENSMUSG00000032525&amp;mirnas=mmu-<br/>miR-27a-<br/>3p&amp;threshold=0)</a> |
| Nfatc3 (mmu) ⓘ  | mmu-miR-27a-3p ⓘ |    | 0.496<br><a href="(/DianaTools/index.php?r=microT_CDS/results&amp;keywords=mmu-miR-27a-3p%20ENSMUSG00000031902&amp;genes=ENSMUSG00000031902&amp;mirnas=mmu-miR-27a-3p&amp;threshold=0)">(/DianaTools/index.php?<br/>r=microT_CDS/results&amp;keywords=mmu-<br/>miR-27a-<br/>3p%20ENSMUSG00000031902&amp;genes=ENSMUSG00000031902&amp;mirnas=mmu-<br/>miR-27a-<br/>3p&amp;threshold=0)</a> |
| Nfatc3 (mmu) ⓘ  | mmu-miR-27a-3p ⓘ |    | 0.496<br><a href="(/DianaTools/index.php?r=microT_CDS/results&amp;keywords=mmu-miR-27a-3p%20ENSMUSG00000031902&amp;genes=ENSMUSG00000031902&amp;mirnas=mmu-miR-27a-3p&amp;threshold=0)">(/DianaTools/index.php?<br/>r=microT_CDS/results&amp;keywords=mmu-<br/>miR-27a-<br/>3p%20ENSMUSG00000031902&amp;genes=ENSMUSG00000031902&amp;mirnas=mmu-<br/>miR-27a-<br/>3p&amp;threshold=0)</a> |
| Dlc1 (mmu) ⓘ    | mmu-miR-27a-3p ⓘ |    | 0.490<br><a href="(/DianaTools/index.php?r=microT_CDS/results&amp;keywords=mmu-miR-27a-3p%20ENSMUSG00000031523&amp;genes=ENSMUSG00000031523&amp;mirnas=mmu-miR-27a-3p&amp;threshold=0)">(/DianaTools/index.php?<br/>r=microT_CDS/results&amp;keywords=mmu-<br/>miR-27a-<br/>3p%20ENSMUSG00000031523&amp;genes=ENSMUSG00000031523&amp;mirnas=mmu-<br/>miR-27a-<br/>3p&amp;threshold=0)</a> |
| Polr2m (mmu) ⓘ  | mmu-miR-27a-3p ⓘ |  | 0.483<br><a href="(/DianaTools/index.php?r=microT_CDS/results&amp;keywords=mmu-miR-27a-3p%20ENSMUSG00000032199&amp;genes=ENSMUSG00000032199&amp;mirnas=mmu-miR-27a-3p&amp;threshold=0)">(/DianaTools/index.php?<br/>r=microT_CDS/results&amp;keywords=mmu-<br/>miR-27a-<br/>3p%20ENSMUSG00000032199&amp;genes=ENSMUSG00000032199&amp;mirnas=mmu-<br/>miR-27a-<br/>3p&amp;threshold=0)</a> |
| Usp2 (mmu) ⓘ    | mmu-miR-27a-3p ⓘ |  | 0.482<br><a href="(/DianaTools/index.php?r=microT_CDS/results&amp;keywords=mmu-miR-27a-3p%20ENSMUSG00000032010&amp;genes=ENSMUSG00000032010&amp;mirnas=mmu-miR-27a-3p&amp;threshold=0)">(/DianaTools/index.php?<br/>r=microT_CDS/results&amp;keywords=mmu-<br/>miR-27a-<br/>3p%20ENSMUSG00000032010&amp;genes=ENSMUSG00000032010&amp;mirnas=mmu-<br/>miR-27a-<br/>3p&amp;threshold=0)</a> |
| Dnaja2 (mmu) ⓘ  | mmu-miR-27a-3p ⓘ |  | 0.479<br><a href="(/DianaTools/index.php?r=microT_CDS/results&amp;keywords=mmu-miR-27a-3p%20ENSMUSG00000031701&amp;genes=ENSMUSG00000031701&amp;mirnas=mmu-miR-27a-3p&amp;threshold=0)">(/DianaTools/index.php?<br/>r=microT_CDS/results&amp;keywords=mmu-<br/>miR-27a-<br/>3p%20ENSMUSG00000031701&amp;genes=ENSMUSG00000031701&amp;mirnas=mmu-<br/>miR-27a-<br/>3p&amp;threshold=0)</a> |
| Smad1 (mmu) ⓘ   | mmu-miR-27a-3p ⓘ |  | 0.474<br><a href="(/DianaTools/index.php?r=microT_CDS/results&amp;keywords=mmu-miR-27a-3p%20ENSMUSG00000031681&amp;genes=ENSMUSG00000031681&amp;mirnas=mmu-miR-27a-3p&amp;threshold=0)">(/DianaTools/index.php?<br/>r=microT_CDS/results&amp;keywords=mmu-<br/>miR-27a-<br/>3p%20ENSMUSG00000031681&amp;genes=ENSMUSG00000031681&amp;mirnas=mmu-<br/>miR-27a-<br/>3p&amp;threshold=0)</a> |

We have placed cookies on your device to help make this website and the services we offer better. By using this site, you agree to the use of cookies. [Learn more](#) ([\(/DianaTools/index.php?r=site/terms\)]((/DianaTools/index.php?r=site/terms))).

I accept



|                       |                  |                                                                                      |                                                                                                                                                                                                                                                                                                                                                                |
|-----------------------|------------------|--------------------------------------------------------------------------------------|----------------------------------------------------------------------------------------------------------------------------------------------------------------------------------------------------------------------------------------------------------------------------------------------------------------------------------------------------------------|
| Smad1 (mmu) ⓘ         | mmu-miR-27a-3p ⓘ |    | 0.474<br><a href="(/DianaTools/index.php?r=miroT_CDS/results&amp;keywords=mmu-miR-27a-3p%20ENSMUSG00000031681&amp;genes=ENSMUSG00000031681&amp;mirnas=mmu-miR-27a-3p&amp;threshold=0)">(/DianaTools/index.php?r=miroT_CDS/results&amp;keywords=mmu-miR-27a-3p%20ENSMUSG00000031681&amp;genes=ENSMUSG00000031681&amp;mirnas=mmu-miR-27a-3p&amp;threshold=0)</a> |
| 2810004N23Rik (mmu) ⓘ | mmu-miR-27a-3p ⓘ |    | 0.468<br><a href="(/DianaTools/index.php?r=miroT_CDS/results&amp;keywords=mmu-miR-27a-3p%20ENSMUSG00000031984&amp;genes=ENSMUSG00000031984&amp;mirnas=mmu-miR-27a-3p&amp;threshold=0)">(/DianaTools/index.php?r=miroT_CDS/results&amp;keywords=mmu-miR-27a-3p%20ENSMUSG00000031984&amp;genes=ENSMUSG00000031984&amp;mirnas=mmu-miR-27a-3p&amp;threshold=0)</a> |
| Usp28 (mmu) ⓘ         | mmu-miR-27a-3p ⓘ |    | 0.467<br><a href="(/DianaTools/index.php?r=miroT_CDS/results&amp;keywords=mmu-miR-27a-3p%20ENSMUSG00000032267&amp;genes=ENSMUSG00000032267&amp;mirnas=mmu-miR-27a-3p&amp;threshold=0)">(/DianaTools/index.php?r=miroT_CDS/results&amp;keywords=mmu-miR-27a-3p%20ENSMUSG00000032267&amp;genes=ENSMUSG00000032267&amp;mirnas=mmu-miR-27a-3p&amp;threshold=0)</a> |
| Afg3l1 (mmu) ⓘ        | mmu-miR-27a-3p ⓘ |    | 0.460<br><a href="(/DianaTools/index.php?r=miroT_CDS/results&amp;keywords=mmu-miR-27a-3p%20ENSMUSG00000031967&amp;genes=ENSMUSG00000031967&amp;mirnas=mmu-miR-27a-3p&amp;threshold=0)">(/DianaTools/index.php?r=miroT_CDS/results&amp;keywords=mmu-miR-27a-3p%20ENSMUSG00000031967&amp;genes=ENSMUSG00000031967&amp;mirnas=mmu-miR-27a-3p&amp;threshold=0)</a> |
| Heatr3 (mmu) ⓘ        | mmu-miR-27a-3p ⓘ |    | 0.455<br><a href="(/DianaTools/index.php?r=miroT_CDS/results&amp;keywords=mmu-miR-27a-3p%20ENSMUSG00000031657&amp;genes=ENSMUSG00000031657&amp;mirnas=mmu-miR-27a-3p&amp;threshold=0)">(/DianaTools/index.php?r=miroT_CDS/results&amp;keywords=mmu-miR-27a-3p%20ENSMUSG00000031657&amp;genes=ENSMUSG00000031657&amp;mirnas=mmu-miR-27a-3p&amp;threshold=0)</a> |
| Hmg20a (mmu) ⓘ        | mmu-miR-27a-3p ⓘ |    | 0.453<br><a href="(/DianaTools/index.php?r=miroT_CDS/results&amp;keywords=mmu-miR-27a-3p%20ENSMUSG00000032329&amp;genes=ENSMUSG00000032329&amp;mirnas=mmu-miR-27a-3p&amp;threshold=0)">(/DianaTools/index.php?r=miroT_CDS/results&amp;keywords=mmu-miR-27a-3p%20ENSMUSG00000032329&amp;genes=ENSMUSG00000032329&amp;mirnas=mmu-miR-27a-3p&amp;threshold=0)</a> |
| Ii10ra (mmu) ⓘ        | mmu-miR-27a-3p ⓘ |    | -                                                                                                                                                                                                                                                                                                                                                              |
| Gtf2e2 (mmu) ⓘ        | mmu-miR-27a-3p ⓘ |    | -                                                                                                                                                                                                                                                                                                                                                              |
| Armc8 (mmu) ⓘ         | mmu-miR-27a-3p ⓘ |   | -                                                                                                                                                                                                                                                                                                                                                              |
| Slc25a36 (mmu) ⓘ      | mmu-miR-27a-3p ⓘ |  | -                                                                                                                                                                                                                                                                                                                                                              |
| Cog4 (mmu) ⓘ          | mmu-miR-27a-3p ⓘ |  | -                                                                                                                                                                                                                                                                                                                                                              |
| Maml2 (mmu) ⓘ         | mmu-miR-27a-3p ⓘ |  | -                                                                                                                                                                                                                                                                                                                                                              |
| Dbr1 (mmu) ⓘ          | mmu-miR-27a-3p ⓘ |  | -                                                                                                                                                                                                                                                                                                                                                              |
| Hyou1 (mmu) ⓘ         | mmu-miR-27a-3p ⓘ |  | -                                                                                                                                                                                                                                                                                                                                                              |
| Fam46a (mmu) ⓘ        | mmu-miR-27a-3p ⓘ |  | -                                                                                                                                                                                                                                                                                                                                                              |
| Cul5 (mmu) ⓘ          | mmu-miR-27a-3p ⓘ |  | -                                                                                                                                                                                                                                                                                                                                                              |
| Birc3 (mmu) ⓘ         | mmu-miR-27a-3p ⓘ |  | -                                                                                                                                                                                                                                                                                                                                                              |
| Srpr (mmu) ⓘ          | mmu-miR-27a-3p ⓘ |  | -                                                                                                                                                                                                                                                                                                                                                              |
| Slc27a1 (mmu) ⓘ       | mmu-miR-27a-3p ⓘ |  | -                                                                                                                                                                                                                                                                                                                                                              |
| Ddx6 (mmu) ⓘ          | mmu-miR-27a-3p ⓘ |  | -                                                                                                                                                                                                                                                                                                                                                              |
| Ets1 (mmu) ⓘ          | mmu-miR-27a-3p ⓘ |  | -                                                                                                                                                                                                                                                                                                                                                              |

We have placed cookies on your device to help make this website and the services we offer better. By using this site, you agree to the use of cookies. [Learn more \(/DianaTools/index.php?r=site/terms\)]((/DianaTools/index.php?r=site/terms))

I accept

|                 |                  |    |   |
|-----------------|------------------|----|---|
| Mpi (mmu) ⓘ     | mmu-miR-27a-3p ⓘ | IP | - |
| Pcd6ip (mmu) ⓘ  | mmu-miR-27a-3p ⓘ | IP | - |
| Atp1b3 (mmu) ⓘ  | mmu-miR-27a-3p ⓘ | IP | - |
| Gnao1 (mmu) ⓘ   | mmu-miR-27a-3p ⓘ | IP | - |
| Ap1g1 (mmu) ⓘ   | mmu-miR-27a-3p ⓘ | IP | - |
| Ireb2 (mmu) ⓘ   | mmu-miR-27a-3p ⓘ | IP | - |
| Ireb2 (mmu) ⓘ   | mmu-miR-27a-3p ⓘ | IP | - |
| Gpt2 (mmu) ⓘ    | mmu-miR-27a-3p ⓘ | IP | - |
| Gnai2 (mmu) ⓘ   | mmu-miR-27a-3p ⓘ | IP | - |
| Rdx (mmu) ⓘ     | mmu-miR-27a-3p ⓘ | IP | - |
| Arpp21 (mmu) ⓘ  | mmu-miR-27a-3p ⓘ | IP | - |
| Anp32a (mmu) ⓘ  | mmu-miR-27a-3p ⓘ | IP | - |
| Anp32a (mmu) ⓘ  | mmu-miR-27a-3p ⓘ | IP | - |
| Slc7a6 (mmu) ⓘ  | mmu-miR-27a-3p ⓘ | IP | - |
| Cotl1 (mmu) ⓘ   | mmu-miR-27a-3p ⓘ | IP | - |
| Clmp (mmu) ⓘ    | mmu-miR-27a-3p ⓘ | IP | - |
| Spg21 (mmu) ⓘ   | mmu-miR-27a-3p ⓘ | IP | - |
| Jam3 (mmu) ⓘ    | mmu-miR-27a-3p ⓘ | IP | - |
| Mvb12a (mmu) ⓘ  | mmu-miR-27a-3p ⓘ | IP | - |
| Tmem66 (mmu) ⓘ  | mmu-miR-27a-3p ⓘ | IP | - |
| Elov5 (mmu) ⓘ   | mmu-miR-27a-3p ⓘ | IP | - |
| Kif23 (mmu) ⓘ   | mmu-miR-27a-3p ⓘ | IP | - |
| Ldlr (mmu) ⓘ    | mmu-miR-27a-3p ⓘ | IP | - |
| Neo1 (mmu) ⓘ    | mmu-miR-27a-3p ⓘ | IP | - |
| Clk3 (mmu) ⓘ    | mmu-miR-27a-3p ⓘ | IP | - |
| Thy1 (mmu) ⓘ    | mmu-miR-27a-3p ⓘ | IP | - |
| Ank1 (mmu) ⓘ    | mmu-miR-27a-3p ⓘ | IP | - |
| Poglut1 (mmu) ⓘ | mmu-miR-27a-3p ⓘ | IP | - |

1,000  
(/DianaTools/index.php?r=mirot\_CDS/results&keywords=mmu-miR-27a-3p%20ENSMUSG00000034064&genes=ENSMUSG00000034064&miR-27a-3p&threshold=0)

We have placed cookies on your device to help make this website and the services we offer better. By using this site, you agree to the use of cookies. [Learn more](#) (/DianaTools/index.php?r=site/terms)

I accept

|                 |                  |                                                                                      |                                                                                                                                                                                               |
|-----------------|------------------|--------------------------------------------------------------------------------------|-----------------------------------------------------------------------------------------------------------------------------------------------------------------------------------------------|
| Pds5b (mmu) ⓘ   | mmu-miR-27a-3p ⓘ |    | 1.000<br><a href="#">(/DianaTools/index.php?r=microT_CDS/results&amp;keywords=mmu-miR-27a-3p%20ENSMUSG00000034021&amp;genes=ENSMUSG00000034021&amp;mirnas=mmu-miR-27a-3p&amp;threshold=0)</a> |
| Pds5b (mmu) ⓘ   | mmu-miR-27a-3p ⓘ |    | 1.000<br><a href="#">(/DianaTools/index.php?r=microT_CDS/results&amp;keywords=mmu-miR-27a-3p%20ENSMUSG00000034021&amp;genes=ENSMUSG00000034021&amp;mirnas=mmu-miR-27a-3p&amp;threshold=0)</a> |
| Lpar6 (mmu) ⓘ   | mmu-miR-27a-3p ⓘ |    | 0.999<br><a href="#">(/DianaTools/index.php?r=microT_CDS/results&amp;keywords=mmu-miR-27a-3p%20ENSMUSG00000033446&amp;genes=ENSMUSG00000033446&amp;mirnas=mmu-miR-27a-3p&amp;threshold=0)</a> |
| Lpar6 (mmu) ⓘ   | mmu-miR-27a-3p ⓘ |    | 0.999<br><a href="#">(/DianaTools/index.php?r=microT_CDS/results&amp;keywords=mmu-miR-27a-3p%20ENSMUSG00000033446&amp;genes=ENSMUSG00000033446&amp;mirnas=mmu-miR-27a-3p&amp;threshold=0)</a> |
| Map2k4 (mmu) ⓘ  | mmu-miR-27a-3p ⓘ |    | 0.998<br><a href="#">(/DianaTools/index.php?r=microT_CDS/results&amp;keywords=mmu-miR-27a-3p%20ENSMUSG00000033352&amp;genes=ENSMUSG00000033352&amp;mirnas=mmu-miR-27a-3p&amp;threshold=0)</a> |
| Mtss1l (mmu) ⓘ  | mmu-miR-27a-3p ⓘ |    | 0.995<br><a href="#">(/DianaTools/index.php?r=microT_CDS/results&amp;keywords=mmu-miR-27a-3p%20ENSMUSG00000033763&amp;genes=ENSMUSG00000033763&amp;mirnas=mmu-miR-27a-3p&amp;threshold=0)</a> |
| Trappc8 (mmu) ⓘ | mmu-miR-27a-3p ⓘ |    | 0.981<br><a href="#">(/DianaTools/index.php?r=microT_CDS/results&amp;keywords=mmu-miR-27a-3p%20ENSMUSG00000033382&amp;genes=ENSMUSG00000033382&amp;mirnas=mmu-miR-27a-3p&amp;threshold=0)</a> |
| Ppp3r1 (mmu) ⓘ  | mmu-miR-27a-3p ⓘ |  | 0.944<br><a href="#">(/DianaTools/index.php?r=microT_CDS/results&amp;keywords=mmu-miR-27a-3p%20ENSMUSG00000033953&amp;genes=ENSMUSG00000033953&amp;mirnas=mmu-miR-27a-3p&amp;threshold=0)</a> |
| Chst2 (mmu) ⓘ   | mmu-miR-27a-3p ⓘ |  | 0.937<br><a href="#">(/DianaTools/index.php?r=microT_CDS/results&amp;keywords=mmu-miR-27a-3p%20ENSMUSG00000033350&amp;genes=ENSMUSG00000033350&amp;mirnas=mmu-miR-27a-3p&amp;threshold=0)</a> |
| Chst2 (mmu) ⓘ   | mmu-miR-27a-3p ⓘ |  | 0.937<br><a href="#">(/DianaTools/index.php?r=microT_CDS/results&amp;keywords=mmu-miR-27a-3p%20ENSMUSG00000033350&amp;genes=ENSMUSG00000033350&amp;mirnas=mmu-miR-27a-3p&amp;threshold=0)</a> |
| Wbp2 (mmu) ⓘ    | mmu-miR-27a-3p ⓘ |  | 0.924<br><a href="#">(/DianaTools/index.php?r=microT_CDS/results&amp;keywords=mmu-miR-27a-3p%20ENSMUSG00000034341&amp;genes=ENSMUSG00000034341&amp;mirnas=mmu-miR-27a-3p&amp;threshold=0)</a> |

We have placed cookies on your device to help make this website and the services we offer better. By using this site, you agree to the use of cookies. [Learn more](#) ([/DianaTools/index.php?r=site/terms](#)).

I accept

|                |                  |                                                                                      |                                                                                                                                                                                                                                                                                                                                                                                           |
|----------------|------------------|--------------------------------------------------------------------------------------|-------------------------------------------------------------------------------------------------------------------------------------------------------------------------------------------------------------------------------------------------------------------------------------------------------------------------------------------------------------------------------------------|
| Wbp2 (mmu) ⓘ   | mmu-miR-27a-3p ⓘ |    | 0.924<br><a href="(/DianaTools/index.php?r=microT_CDS/results&amp;keywords=mmu-miR-27a-3p%20ENSMUSG00000034341&amp;genes=ENSMUSG00000034341&amp;mirnas=mmu-miR-27a-3p&amp;threshold=0)">(/DianaTools/index.php?<br/>r=microT_CDS/results&amp;keywords=mmu-<br/>miR-27a-<br/>3p%20ENSMUSG00000034341&amp;genes=ENSMUSG00000034341&amp;mirnas=mmu-<br/>miR-27a-<br/>3p&amp;threshold=0)</a> |
| Pxk (mmu) ⓘ    | mmu-miR-27a-3p ⓘ |    | 0.895<br><a href="(/DianaTools/index.php?r=microT_CDS/results&amp;keywords=mmu-miR-27a-3p%20ENSMUSG00000033885&amp;genes=ENSMUSG00000033885&amp;mirnas=mmu-miR-27a-3p&amp;threshold=0)">(/DianaTools/index.php?<br/>r=microT_CDS/results&amp;keywords=mmu-<br/>miR-27a-<br/>3p%20ENSMUSG00000033885&amp;genes=ENSMUSG00000033885&amp;mirnas=mmu-<br/>miR-27a-<br/>3p&amp;threshold=0)</a> |
| Med13 (mmu) ⓘ  | mmu-miR-27a-3p ⓘ |    | 0.858<br><a href="(/DianaTools/index.php?r=microT_CDS/results&amp;keywords=mmu-miR-27a-3p%20ENSMUSG00000034297&amp;genes=ENSMUSG00000034297&amp;mirnas=mmu-miR-27a-3p&amp;threshold=0)">(/DianaTools/index.php?<br/>r=microT_CDS/results&amp;keywords=mmu-<br/>miR-27a-<br/>3p%20ENSMUSG00000034297&amp;genes=ENSMUSG00000034297&amp;mirnas=mmu-<br/>miR-27a-<br/>3p&amp;threshold=0)</a> |
| Med13 (mmu) ⓘ  | mmu-miR-27a-3p ⓘ |    | 0.858<br><a href="(/DianaTools/index.php?r=microT_CDS/results&amp;keywords=mmu-miR-27a-3p%20ENSMUSG00000034297&amp;genes=ENSMUSG00000034297&amp;mirnas=mmu-miR-27a-3p&amp;threshold=0)">(/DianaTools/index.php?<br/>r=microT_CDS/results&amp;keywords=mmu-<br/>miR-27a-<br/>3p%20ENSMUSG00000034297&amp;genes=ENSMUSG00000034297&amp;mirnas=mmu-<br/>miR-27a-<br/>3p&amp;threshold=0)</a> |
| Hsd1l (mmu) ⓘ  | mmu-miR-27a-3p ⓘ |    | 0.853<br><a href="(/DianaTools/index.php?r=microT_CDS/results&amp;keywords=mmu-miR-27a-3p%20ENSMUSG00000034189&amp;genes=ENSMUSG00000034189&amp;mirnas=mmu-miR-27a-3p&amp;threshold=0)">(/DianaTools/index.php?<br/>r=microT_CDS/results&amp;keywords=mmu-<br/>miR-27a-<br/>3p%20ENSMUSG00000034189&amp;genes=ENSMUSG00000034189&amp;mirnas=mmu-<br/>miR-27a-<br/>3p&amp;threshold=0)</a> |
| Setd5 (mmu) ⓘ  | mmu-miR-27a-3p ⓘ |    | 0.806<br><a href="(/DianaTools/index.php?r=microT_CDS/results&amp;keywords=mmu-miR-27a-3p%20ENSMUSG00000034269&amp;genes=ENSMUSG00000034269&amp;mirnas=mmu-miR-27a-3p&amp;threshold=0)">(/DianaTools/index.php?<br/>r=microT_CDS/results&amp;keywords=mmu-<br/>miR-27a-<br/>3p%20ENSMUSG00000034269&amp;genes=ENSMUSG00000034269&amp;mirnas=mmu-<br/>miR-27a-<br/>3p&amp;threshold=0)</a> |
| Ube2f (mmu) ⓘ  | mmu-miR-27a-3p ⓘ |    | 0.788<br><a href="(/DianaTools/index.php?r=microT_CDS/results&amp;keywords=mmu-miR-27a-3p%20ENSMUSG00000034343&amp;genes=ENSMUSG00000034343&amp;mirnas=mmu-miR-27a-3p&amp;threshold=0)">(/DianaTools/index.php?<br/>r=microT_CDS/results&amp;keywords=mmu-<br/>miR-27a-<br/>3p%20ENSMUSG00000034343&amp;genes=ENSMUSG00000034343&amp;mirnas=mmu-<br/>miR-27a-<br/>3p&amp;threshold=0)</a> |
| Pdxk (mmu) ⓘ   | mmu-miR-27a-3p ⓘ |  | 0.779<br><a href="(/DianaTools/index.php?r=microT_CDS/results&amp;keywords=mmu-miR-27a-3p%20ENSMUSG00000032788&amp;genes=ENSMUSG00000032788&amp;mirnas=mmu-miR-27a-3p&amp;threshold=0)">(/DianaTools/index.php?<br/>r=microT_CDS/results&amp;keywords=mmu-<br/>miR-27a-<br/>3p%20ENSMUSG00000032788&amp;genes=ENSMUSG00000032788&amp;mirnas=mmu-<br/>miR-27a-<br/>3p&amp;threshold=0)</a> |
| Arid2 (mmu) ⓘ  | mmu-miR-27a-3p ⓘ |  | 0.778<br><a href="(/DianaTools/index.php?r=microT_CDS/results&amp;keywords=mmu-miR-27a-3p%20ENSMUSG0000003237&amp;genes=ENSMUSG0000003237&amp;mirnas=mmu-miR-27a-3p&amp;threshold=0)">(/DianaTools/index.php?<br/>r=microT_CDS/results&amp;keywords=mmu-<br/>miR-27a-<br/>3p%20ENSMUSG0000003237&amp;genes=ENSMUSG0000003237&amp;mirnas=mmu-<br/>miR-27a-<br/>3p&amp;threshold=0)</a>     |
| Tbc1d4 (mmu) ⓘ | mmu-miR-27a-3p ⓘ |  | 0.774<br><a href="(/DianaTools/index.php?r=microT_CDS/results&amp;keywords=mmu-miR-27a-3p%20ENSMUSG00000033083&amp;genes=ENSMUSG00000033083&amp;mirnas=mmu-miR-27a-3p&amp;threshold=0)">(/DianaTools/index.php?<br/>r=microT_CDS/results&amp;keywords=mmu-<br/>miR-27a-<br/>3p%20ENSMUSG00000033083&amp;genes=ENSMUSG00000033083&amp;mirnas=mmu-<br/>miR-27a-<br/>3p&amp;threshold=0)</a> |
| Fndc3a (mmu) ⓘ | mmu-miR-27a-3p ⓘ |  | 0.751<br><a href="(/DianaTools/index.php?r=microT_CDS/results&amp;keywords=mmu-miR-27a-3p%20ENSMUSG00000033487&amp;genes=ENSMUSG00000033487&amp;mirnas=mmu-miR-27a-3p&amp;threshold=0)">(/DianaTools/index.php?<br/>r=microT_CDS/results&amp;keywords=mmu-<br/>miR-27a-<br/>3p%20ENSMUSG00000033487&amp;genes=ENSMUSG00000033487&amp;mirnas=mmu-<br/>miR-27a-<br/>3p&amp;threshold=0)</a> |

We have placed cookies on your device to help make this website and the services we offer better. By using this site, you agree to the use of cookies. [Learn more](#) ([\(/DianaTools/index.php?r=site/terms\)]((/DianaTools/index.php?r=site/terms))).

I accept

|                 |                  |    |                                                                                                                                                                                   |
|-----------------|------------------|----|-----------------------------------------------------------------------------------------------------------------------------------------------------------------------------------|
| Neurl1b (mmu) ⓘ | mmu-miR-27a-3p ⓘ | IP | 0.735<br>(/DianaTools/index.php?<br>r=microT_CDS/results&keywords=mmu-<br>miR-27a-<br>3p%20ENSMUSG00000034413&genes=ENSMUSG00000034413&mirnas=mmu-<br>miR-27a-<br>3p&threshold=0) |
| Larp4b (mmu) ⓘ  | mmu-miR-27a-3p ⓘ | IP | 0.735<br>(/DianaTools/index.php?<br>r=microT_CDS/results&keywords=mmu-<br>miR-27a-<br>3p%20ENSMUSG00000033499&genes=ENSMUSG00000033499&mirnas=mmu-<br>miR-27a-<br>3p&threshold=0) |
| Senp1 (mmu) ⓘ   | mmu-miR-27a-3p ⓘ | IP | 0.699<br>(/DianaTools/index.php?<br>r=microT_CDS/results&keywords=mmu-<br>miR-27a-<br>3p%20ENSMUSG00000033075&genes=ENSMUSG00000033075&mirnas=mmu-<br>miR-27a-<br>3p&threshold=0) |
| Foxj3 (mmu) ⓘ   | mmu-miR-27a-3p ⓘ | IP | 0.693<br>(/DianaTools/index.php?<br>r=microT_CDS/results&keywords=mmu-<br>miR-27a-<br>3p%20ENSMUSG00000032998&genes=ENSMUSG00000032998&mirnas=mmu-<br>miR-27a-<br>3p&threshold=0) |
| Cdc14b (mmu) ⓘ  | mmu-miR-27a-3p ⓘ | IP | 0.692<br>(/DianaTools/index.php?<br>r=microT_CDS/results&keywords=mmu-<br>miR-27a-<br>3p%20ENSMUSG00000033102&genes=ENSMUSG00000033102&mirnas=mmu-<br>miR-27a-<br>3p&threshold=0) |
| Senp6 (mmu) ⓘ   | mmu-miR-27a-3p ⓘ | IP | 0.681<br>(/DianaTools/index.php?<br>r=microT_CDS/results&keywords=mmu-<br>miR-27a-<br>3p%20ENSMUSG00000034252&genes=ENSMUSG00000034252&mirnas=mmu-<br>miR-27a-<br>3p&threshold=0) |
| Scaf11 (mmu) ⓘ  | mmu-miR-27a-3p ⓘ | IP | 0.664<br>(/DianaTools/index.php?<br>r=microT_CDS/results&keywords=mmu-<br>miR-27a-<br>3p%20ENSMUSG00000033228&genes=ENSMUSG00000033228&mirnas=mmu-<br>miR-27a-<br>3p&threshold=0) |
| Gucy1a3 (mmu) ⓘ | mmu-miR-27a-3p ⓘ | IP | 0.633<br>(/DianaTools/index.php?<br>r=microT_CDS/results&keywords=mmu-<br>miR-27a-<br>3p%20ENSMUSG00000033910&genes=ENSMUSG00000033910&mirnas=mmu-<br>miR-27a-<br>3p&threshold=0) |
| Vav3 (mmu) ⓘ    | mmu-miR-27a-3p ⓘ | IP | 0.627<br>(/DianaTools/index.php?<br>r=microT_CDS/results&keywords=mmu-<br>miR-27a-<br>3p%20ENSMUSG00000033721&genes=ENSMUSG00000033721&mirnas=mmu-<br>miR-27a-<br>3p&threshold=0) |
| Vav3 (mmu) ⓘ    | mmu-miR-27a-3p ⓘ | IP | 0.627<br>(/DianaTools/index.php?<br>r=microT_CDS/results&keywords=mmu-<br>miR-27a-<br>3p%20ENSMUSG00000033721&genes=ENSMUSG00000033721&mirnas=mmu-<br>miR-27a-<br>3p&threshold=0) |
| Zswim6 (mmu) ⓘ  | mmu-miR-27a-3p ⓘ | IP | 0.627<br>(/DianaTools/index.php?<br>r=microT_CDS/results&keywords=mmu-<br>miR-27a-<br>3p%20ENSMUSG00000032846&genes=ENSMUSG00000032846&mirnas=mmu-<br>miR-27a-<br>3p&threshold=0) |

We have placed cookies on your device to help make this website and the services we offer better. By using this site, you agree to the use of cookies. [Learn more](#) (</DianaTools/index.php?r=site/terms>).

I accept

|                       |                  |                                                                                      |                                                                                                                                                                                                                                                                                                                                                                                           |
|-----------------------|------------------|--------------------------------------------------------------------------------------|-------------------------------------------------------------------------------------------------------------------------------------------------------------------------------------------------------------------------------------------------------------------------------------------------------------------------------------------------------------------------------------------|
| Zswim6 (mmu) ⓘ        | mmu-miR-27a-3p ⓘ |    | 0.627<br><a href="(/DianaTools/index.php?r=microT_CDS/results&amp;keywords=mmu-miR-27a-3p%20ENSMUSG00000032846&amp;genes=ENSMUSG00000032846&amp;mirnas=mmu-miR-27a-3p&amp;threshold=0)">(/DianaTools/index.php?<br/>r=microT_CDS/results&amp;keywords=mmu-<br/>miR-27a-<br/>3p%20ENSMUSG00000032846&amp;genes=ENSMUSG00000032846&amp;mirnas=mmu-<br/>miR-27a-<br/>3p&amp;threshold=0)</a> |
| Nsf (mmu) ⓘ           | mmu-miR-27a-3p ⓘ |    | 0.618<br><a href="(/DianaTools/index.php?r=microT_CDS/results&amp;keywords=mmu-miR-27a-3p%20ENSMUSG00000034187&amp;genes=ENSMUSG00000034187&amp;mirnas=mmu-miR-27a-3p&amp;threshold=0)">(/DianaTools/index.php?<br/>r=microT_CDS/results&amp;keywords=mmu-<br/>miR-27a-<br/>3p%20ENSMUSG00000034187&amp;genes=ENSMUSG00000034187&amp;mirnas=mmu-<br/>miR-27a-<br/>3p&amp;threshold=0)</a> |
| Cep350 (mmu) ⓘ        | mmu-miR-27a-3p ⓘ |    | 0.589<br><a href="(/DianaTools/index.php?r=microT_CDS/results&amp;keywords=mmu-miR-27a-3p%20ENSMUSG00000033671&amp;genes=ENSMUSG00000033671&amp;mirnas=mmu-miR-27a-3p&amp;threshold=0)">(/DianaTools/index.php?<br/>r=microT_CDS/results&amp;keywords=mmu-<br/>miR-27a-<br/>3p%20ENSMUSG00000033671&amp;genes=ENSMUSG00000033671&amp;mirnas=mmu-<br/>miR-27a-<br/>3p&amp;threshold=0)</a> |
| Fem1c (mmu) ⓘ         | mmu-miR-27a-3p ⓘ |    | 0.589<br><a href="(/DianaTools/index.php?r=microT_CDS/results&amp;keywords=mmu-miR-27a-3p%20ENSMUSG00000033319&amp;genes=ENSMUSG00000033319&amp;mirnas=mmu-miR-27a-3p&amp;threshold=0)">(/DianaTools/index.php?<br/>r=microT_CDS/results&amp;keywords=mmu-<br/>miR-27a-<br/>3p%20ENSMUSG00000033319&amp;genes=ENSMUSG00000033319&amp;mirnas=mmu-<br/>miR-27a-<br/>3p&amp;threshold=0)</a> |
| 9430020K01Rik (mmu) ⓘ | mmu-miR-27a-3p ⓘ |    | 0.582<br><a href="(/DianaTools/index.php?r=microT_CDS/results&amp;keywords=mmu-miR-27a-3p%20ENSMUSG00000033960&amp;genes=ENSMUSG00000033960&amp;mirnas=mmu-miR-27a-3p&amp;threshold=0)">(/DianaTools/index.php?<br/>r=microT_CDS/results&amp;keywords=mmu-<br/>miR-27a-<br/>3p%20ENSMUSG00000033960&amp;genes=ENSMUSG00000033960&amp;mirnas=mmu-<br/>miR-27a-<br/>3p&amp;threshold=0)</a> |
| Ogt (mmu) ⓘ           | mmu-miR-27a-3p ⓘ |    | 0.580<br><a href="(/DianaTools/index.php?r=microT_CDS/results&amp;keywords=mmu-miR-27a-3p%20ENSMUSG00000034160&amp;genes=ENSMUSG00000034160&amp;mirnas=mmu-miR-27a-3p&amp;threshold=0)">(/DianaTools/index.php?<br/>r=microT_CDS/results&amp;keywords=mmu-<br/>miR-27a-<br/>3p%20ENSMUSG00000034160&amp;genes=ENSMUSG00000034160&amp;mirnas=mmu-<br/>miR-27a-<br/>3p&amp;threshold=0)</a> |
| Zbtb1 (mmu) ⓘ         | mmu-miR-27a-3p ⓘ |   | 0.579<br><a href="(/DianaTools/index.php?r=microT_CDS/results&amp;keywords=mmu-miR-27a-3p%20ENSMUSG00000033454&amp;genes=ENSMUSG00000033454&amp;mirnas=mmu-miR-27a-3p&amp;threshold=0)">(/DianaTools/index.php?<br/>r=microT_CDS/results&amp;keywords=mmu-<br/>miR-27a-<br/>3p%20ENSMUSG00000033454&amp;genes=ENSMUSG00000033454&amp;mirnas=mmu-<br/>miR-27a-<br/>3p&amp;threshold=0)</a> |
| Prkar2a (mmu) ⓘ       | mmu-miR-27a-3p ⓘ |  | 0.575<br><a href="(/DianaTools/index.php?r=microT_CDS/results&amp;keywords=mmu-miR-27a-3p%20ENSMUSG00000032601&amp;genes=ENSMUSG00000032601&amp;mirnas=mmu-miR-27a-3p&amp;threshold=0)">(/DianaTools/index.php?<br/>r=microT_CDS/results&amp;keywords=mmu-<br/>miR-27a-<br/>3p%20ENSMUSG00000032601&amp;genes=ENSMUSG00000032601&amp;mirnas=mmu-<br/>miR-27a-<br/>3p&amp;threshold=0)</a> |
| Fam207a (mmu) ⓘ       | mmu-miR-27a-3p ⓘ |  | 0.572<br><a href="(/DianaTools/index.php?r=microT_CDS/results&amp;keywords=mmu-miR-27a-3p%20ENSMUSG00000032977&amp;genes=ENSMUSG00000032977&amp;mirnas=mmu-miR-27a-3p&amp;threshold=0)">(/DianaTools/index.php?<br/>r=microT_CDS/results&amp;keywords=mmu-<br/>miR-27a-<br/>3p%20ENSMUSG00000032977&amp;genes=ENSMUSG00000032977&amp;mirnas=mmu-<br/>miR-27a-<br/>3p&amp;threshold=0)</a> |
| Cmp (mmu) ⓘ           | mmu-miR-27a-3p ⓘ |  | 0.560<br><a href="(/DianaTools/index.php?r=microT_CDS/results&amp;keywords=mmu-miR-27a-3p%20ENSMUSG00000034390&amp;genes=ENSMUSG00000034390&amp;mirnas=mmu-miR-27a-3p&amp;threshold=0)">(/DianaTools/index.php?<br/>r=microT_CDS/results&amp;keywords=mmu-<br/>miR-27a-<br/>3p%20ENSMUSG00000034390&amp;genes=ENSMUSG00000034390&amp;mirnas=mmu-<br/>miR-27a-<br/>3p&amp;threshold=0)</a> |
| Tmed8 (mmu) ⓘ         | mmu-miR-27a-3p ⓘ |  | 0.543<br><a href="(/DianaTools/index.php?r=microT_CDS/results&amp;keywords=mmu-miR-27a-3p%20ENSMUSG00000034111&amp;genes=ENSMUSG00000034111&amp;mirnas=mmu-miR-27a-3p&amp;threshold=0)">(/DianaTools/index.php?<br/>r=microT_CDS/results&amp;keywords=mmu-<br/>miR-27a-<br/>3p%20ENSMUSG00000034111&amp;genes=ENSMUSG00000034111&amp;mirnas=mmu-<br/>miR-27a-<br/>3p&amp;threshold=0)</a> |

We have placed cookies on your device to help make this website and the services we offer better. By using this site, you agree to the use of cookies. [Learn more](#) ([/DianaTools/index.php?r=site/terms]((/DianaTools/index.php?r=site/terms))).

I accept

|                |                  |                                                                                      |                                                                                                                                                                                                                        |
|----------------|------------------|--------------------------------------------------------------------------------------|------------------------------------------------------------------------------------------------------------------------------------------------------------------------------------------------------------------------|
| Cbl (mmu) ⓘ    | mmu-miR-27a-3p ⓘ |    | <p><a href="#">0.541</a><br/> <a href="#">(/DianaTools/index.php?r=microT_CDS/results&amp;keywords=mmu-miR-27a-3p%20ENSMUSG00000034342&amp;genes=ENSMUSG00000034342&amp;mirnas=mmu-miR-27a-3p&amp;threshold=0)</a></p> |
| Abtb2 (mmu) ⓘ  | mmu-miR-27a-3p ⓘ |    | <p><a href="#">0.537</a><br/> <a href="#">(/DianaTools/index.php?r=microT_CDS/results&amp;keywords=mmu-miR-27a-3p%20ENSMUSG00000032724&amp;genes=ENSMUSG00000032724&amp;mirnas=mmu-miR-27a-3p&amp;threshold=0)</a></p> |
| Npat (mmu) ⓘ   | mmu-miR-27a-3p ⓘ |    | <p><a href="#">0.527</a><br/> <a href="#">(/DianaTools/index.php?r=microT_CDS/results&amp;keywords=mmu-miR-27a-3p%20ENSMUSG00000033054&amp;genes=ENSMUSG00000033054&amp;mirnas=mmu-miR-27a-3p&amp;threshold=0)</a></p> |
| Npat (mmu) ⓘ   | mmu-miR-27a-3p ⓘ |    | <p><a href="#">0.527</a><br/> <a href="#">(/DianaTools/index.php?r=microT_CDS/results&amp;keywords=mmu-miR-27a-3p%20ENSMUSG00000033054&amp;genes=ENSMUSG00000033054&amp;mirnas=mmu-miR-27a-3p&amp;threshold=0)</a></p> |
| Camkv (mmu) ⓘ  | mmu-miR-27a-3p ⓘ |    | <p><a href="#">0.526</a><br/> <a href="#">(/DianaTools/index.php?r=microT_CDS/results&amp;keywords=mmu-miR-27a-3p%20ENSMUSG00000032936&amp;genes=ENSMUSG00000032936&amp;mirnas=mmu-miR-27a-3p&amp;threshold=0)</a></p> |
| Hdlbp (mmu) ⓘ  | mmu-miR-27a-3p ⓘ |    | <p><a href="#">0.514</a><br/> <a href="#">(/DianaTools/index.php?r=microT_CDS/results&amp;keywords=mmu-miR-27a-3p%20ENSMUSG00000034088&amp;genes=ENSMUSG00000034088&amp;mirnas=mmu-miR-27a-3p&amp;threshold=0)</a></p> |
| Parp14 (mmu) ⓘ | mmu-miR-27a-3p ⓘ |    | <p><a href="#">0.510</a><br/> <a href="#">(/DianaTools/index.php?r=microT_CDS/results&amp;keywords=mmu-miR-27a-3p%20ENSMUSG00000034422&amp;genes=ENSMUSG00000034422&amp;mirnas=mmu-miR-27a-3p&amp;threshold=0)</a></p> |
| Atm (mmu) ⓘ    | mmu-miR-27a-3p ⓘ |  | <p><a href="#">0.498</a><br/> <a href="#">(/DianaTools/index.php?r=microT_CDS/results&amp;keywords=mmu-miR-27a-3p%20ENSMUSG00000034218&amp;genes=ENSMUSG00000034218&amp;mirnas=mmu-miR-27a-3p&amp;threshold=0)</a></p> |
| Brk1 (mmu) ⓘ   | mmu-miR-27a-3p ⓘ |  | <p><a href="#">0.494</a><br/> <a href="#">(/DianaTools/index.php?r=microT_CDS/results&amp;keywords=mmu-miR-27a-3p%20ENSMUSG00000033940&amp;genes=ENSMUSG00000033940&amp;mirnas=mmu-miR-27a-3p&amp;threshold=0)</a></p> |
| Brk1 (mmu) ⓘ   | mmu-miR-27a-3p ⓘ |  | <p><a href="#">0.494</a><br/> <a href="#">(/DianaTools/index.php?r=microT_CDS/results&amp;keywords=mmu-miR-27a-3p%20ENSMUSG00000033940&amp;genes=ENSMUSG00000033940&amp;mirnas=mmu-miR-27a-3p&amp;threshold=0)</a></p> |
| Entpd6 (mmu) ⓘ | mmu-miR-27a-3p ⓘ |  | <p><a href="#">0.492</a><br/> <a href="#">(/DianaTools/index.php?r=microT_CDS/results&amp;keywords=mmu-miR-27a-3p%20ENSMUSG00000033068&amp;genes=ENSMUSG00000033068&amp;mirnas=mmu-miR-27a-3p&amp;threshold=0)</a></p> |

We have placed cookies on your device to help make this website and the services we offer better. By using this site, you agree to the use of cookies. [Learn more](#) ([/DianaTools/index.php?r=site/terms](#)).

I accept

|                |                  |                                                                                      |                                                                                                                                                                                                                                                                                                                                                                                           |
|----------------|------------------|--------------------------------------------------------------------------------------|-------------------------------------------------------------------------------------------------------------------------------------------------------------------------------------------------------------------------------------------------------------------------------------------------------------------------------------------------------------------------------------------|
| Tulp4 (mmu) ⓘ  | mmu-miR-27a-3p ⓘ |    | 0.488<br><a href="(/DianaTools/index.php?r=microT_CDS/results&amp;keywords=mmu-miR-27a-3p%20ENSMUSG00000034377&amp;genes=ENSMUSG00000034377&amp;mirnas=mmu-miR-27a-3p&amp;threshold=0)">(/DianaTools/index.php?<br/>r=microT_CDS/results&amp;keywords=mmu-<br/>miR-27a-<br/>3p%20ENSMUSG00000034377&amp;genes=ENSMUSG00000034377&amp;mirnas=mmu-<br/>miR-27a-<br/>3p&amp;threshold=0)</a> |
| Gucd1 (mmu) ⓘ  | mmu-miR-27a-3p ⓘ |    | 0.480<br><a href="(/DianaTools/index.php?r=microT_CDS/results&amp;keywords=mmu-miR-27a-3p%20ENSMUSG00000033416&amp;genes=ENSMUSG00000033416&amp;mirnas=mmu-miR-27a-3p&amp;threshold=0)">(/DianaTools/index.php?<br/>r=microT_CDS/results&amp;keywords=mmu-<br/>miR-27a-<br/>3p%20ENSMUSG00000033416&amp;genes=ENSMUSG00000033416&amp;mirnas=mmu-<br/>miR-27a-<br/>3p&amp;threshold=0)</a> |
| Mycbp2 (mmu) ⓘ | mmu-miR-27a-3p ⓘ |    | 0.478<br><a href="(/DianaTools/index.php?r=microT_CDS/results&amp;keywords=mmu-miR-27a-3p%20ENSMUSG00000033004&amp;genes=ENSMUSG00000033004&amp;mirnas=mmu-miR-27a-3p&amp;threshold=0)">(/DianaTools/index.php?<br/>r=microT_CDS/results&amp;keywords=mmu-<br/>miR-27a-<br/>3p%20ENSMUSG00000033004&amp;genes=ENSMUSG00000033004&amp;mirnas=mmu-<br/>miR-27a-<br/>3p&amp;threshold=0)</a> |
| Faah (mmu) ⓘ   | mmu-miR-27a-3p ⓘ |    | 0.474<br><a href="(/DianaTools/index.php?r=microT_CDS/results&amp;keywords=mmu-miR-27a-3p%20ENSMUSG00000034171&amp;genes=ENSMUSG00000034171&amp;mirnas=mmu-miR-27a-3p&amp;threshold=0)">(/DianaTools/index.php?<br/>r=microT_CDS/results&amp;keywords=mmu-<br/>miR-27a-<br/>3p%20ENSMUSG00000034171&amp;genes=ENSMUSG00000034171&amp;mirnas=mmu-<br/>miR-27a-<br/>3p&amp;threshold=0)</a> |
| Faah (mmu) ⓘ   | mmu-miR-27a-3p ⓘ |    | 0.474<br><a href="(/DianaTools/index.php?r=microT_CDS/results&amp;keywords=mmu-miR-27a-3p%20ENSMUSG00000034171&amp;genes=ENSMUSG00000034171&amp;mirnas=mmu-miR-27a-3p&amp;threshold=0)">(/DianaTools/index.php?<br/>r=microT_CDS/results&amp;keywords=mmu-<br/>miR-27a-<br/>3p%20ENSMUSG00000034171&amp;genes=ENSMUSG00000034171&amp;mirnas=mmu-<br/>miR-27a-<br/>3p&amp;threshold=0)</a> |
| Exoc6b (mmu) ⓘ | mmu-miR-27a-3p ⓘ |    | 0.466<br><a href="(/DianaTools/index.php?r=microT_CDS/results&amp;keywords=mmu-miR-27a-3p%20ENSMUSG00000033769&amp;genes=ENSMUSG00000033769&amp;mirnas=mmu-miR-27a-3p&amp;threshold=0)">(/DianaTools/index.php?<br/>r=microT_CDS/results&amp;keywords=mmu-<br/>miR-27a-<br/>3p%20ENSMUSG00000033769&amp;genes=ENSMUSG00000033769&amp;mirnas=mmu-<br/>miR-27a-<br/>3p&amp;threshold=0)</a> |
| Pon2 (mmu) ⓘ   | mmu-miR-27a-3p ⓘ |   | 0.464<br><a href="(/DianaTools/index.php?r=microT_CDS/results&amp;keywords=mmu-miR-27a-3p%20ENSMUSG00000032667&amp;genes=ENSMUSG00000032667&amp;mirnas=mmu-miR-27a-3p&amp;threshold=0)">(/DianaTools/index.php?<br/>r=microT_CDS/results&amp;keywords=mmu-<br/>miR-27a-<br/>3p%20ENSMUSG00000032667&amp;genes=ENSMUSG00000032667&amp;mirnas=mmu-<br/>miR-27a-<br/>3p&amp;threshold=0)</a> |
| Malt1 (mmu) ⓘ  | mmu-miR-27a-3p ⓘ |  | 0.459<br><a href="(/DianaTools/index.php?r=microT_CDS/results&amp;keywords=mmu-miR-27a-3p%20ENSMUSG00000032688&amp;genes=ENSMUSG00000032688&amp;mirnas=mmu-miR-27a-3p&amp;threshold=0)">(/DianaTools/index.php?<br/>r=microT_CDS/results&amp;keywords=mmu-<br/>miR-27a-<br/>3p%20ENSMUSG00000032688&amp;genes=ENSMUSG00000032688&amp;mirnas=mmu-<br/>miR-27a-<br/>3p&amp;threshold=0)</a> |
| Tom6 (mmu) ⓘ   | mmu-miR-27a-3p ⓘ |  | 0.456<br><a href="(/DianaTools/index.php?r=microT_CDS/results&amp;keywords=mmu-miR-27a-3p%20ENSMUSG00000033475&amp;genes=ENSMUSG00000033475&amp;mirnas=mmu-miR-27a-3p&amp;threshold=0)">(/DianaTools/index.php?<br/>r=microT_CDS/results&amp;keywords=mmu-<br/>miR-27a-<br/>3p%20ENSMUSG00000033475&amp;genes=ENSMUSG00000033475&amp;mirnas=mmu-<br/>miR-27a-<br/>3p&amp;threshold=0)</a> |
| Mtmr3 (mmu) ⓘ  | mmu-miR-27a-3p ⓘ |  | 0.451<br><a href="(/DianaTools/index.php?r=microT_CDS/results&amp;keywords=mmu-miR-27a-3p%20ENSMUSG00000034354&amp;genes=ENSMUSG00000034354&amp;mirnas=mmu-miR-27a-3p&amp;threshold=0)">(/DianaTools/index.php?<br/>r=microT_CDS/results&amp;keywords=mmu-<br/>miR-27a-<br/>3p%20ENSMUSG00000034354&amp;genes=ENSMUSG00000034354&amp;mirnas=mmu-<br/>miR-27a-<br/>3p&amp;threshold=0)</a> |
| Ccnd3 (mmu) ⓘ  | mmu-miR-27a-3p ⓘ |  | -                                                                                                                                                                                                                                                                                                                                                                                         |
| Diap2 (mmu) ⓘ  | mmu-miR-27a-3p ⓘ |  | -                                                                                                                                                                                                                                                                                                                                                                                         |
| Eml4 (mmu) ⓘ   | mmu-miR-27a-3p ⓘ |  | -                                                                                                                                                                                                                                                                                                                                                                                         |

We have placed cookies on your device to help make this website and the services we offer better. By using this site, you agree to the use of cookies. [Learn more](#) ([/DianaTools/index.php?r=site/terms]((/DianaTools/index.php?r=site/terms))).

I accept



|                       |                  |    |   |
|-----------------------|------------------|----|---|
| Cipc (mmu) ⓘ          | mmu-miR-27a-3p ⓘ | IP | - |
| Wdr3 (mmu) ⓘ          | mmu-miR-27a-3p ⓘ | IP | - |
| Ip6k1 (mmu) ⓘ         | mmu-miR-27a-3p ⓘ | IP | - |
| 1300017J02Rik (mmu) ⓘ | mmu-miR-27a-3p ⓘ | IP | - |
| Acs1 (mmu) ⓘ          | mmu-miR-27a-3p ⓘ | IP | - |
| Sfxn5 (mmu) ⓘ         | mmu-miR-27a-3p ⓘ | IP | - |
| Ctnd1 (mmu) ⓘ         | mmu-miR-27a-3p ⓘ | IP | - |
| Fam20b (mmu) ⓘ        | mmu-miR-27a-3p ⓘ | IP | - |
| Sf3b3 (mmu) ⓘ         | mmu-miR-27a-3p ⓘ | IP | - |
| Lpp (mmu) ⓘ           | mmu-miR-27a-3p ⓘ | IP | - |
| Map9 (mmu) ⓘ          | mmu-miR-27a-3p ⓘ | IP | - |
| Map9 (mmu) ⓘ          | mmu-miR-27a-3p ⓘ | IP | - |
| Lrrc58 (mmu) ⓘ        | mmu-miR-27a-3p ⓘ | IP | - |
| Lsm3 (mmu) ⓘ          | mmu-miR-27a-3p ⓘ | IP | - |
| Lsm3 (mmu) ⓘ          | mmu-miR-27a-3p ⓘ | IP | - |
| Fam208b (mmu) ⓘ       | mmu-miR-27a-3p ⓘ | IP | - |
| Fam208b (mmu) ⓘ       | mmu-miR-27a-3p ⓘ | IP | - |
| Zfc3h1 (mmu) ⓘ        | mmu-miR-27a-3p ⓘ | IP | - |
| Ctdp1 (mmu) ⓘ         | mmu-miR-27a-3p ⓘ | IP | - |
| Kcnk1 (mmu) ⓘ         | mmu-miR-27a-3p ⓘ | IP | - |
| Nol12 (mmu) ⓘ         | mmu-miR-27a-3p ⓘ | IP | - |
| Atp1a1 (mmu) ⓘ        | mmu-miR-27a-3p ⓘ | IP | - |
| Ctdspl2 (mmu) ⓘ       | mmu-miR-27a-3p ⓘ | IP | - |
| Vav1 (mmu) ⓘ          | mmu-miR-27a-3p ⓘ | IP | - |
| Pdpr (mmu) ⓘ          | mmu-miR-27a-3p ⓘ | IP | - |
| Gucy1a3 (mmu) ⓘ       | mmu-miR-27a-3p ⓘ | IP | - |
| Ip6k2 (mmu) ⓘ         | mmu-miR-27a-3p ⓘ | IP | - |
| Ppp1r9a (mmu) ⓘ       | mmu-miR-27a-3p ⓘ | IP | - |
| Micall1 (mmu) ⓘ       | mmu-miR-27a-3p ⓘ | IP | - |
| Trim33 (mmu) ⓘ        | mmu-miR-27a-3p ⓘ | IP | - |
| Lrig2 (mmu) ⓘ         | mmu-miR-27a-3p ⓘ | IP | - |

We have placed cookies on your device to help make this website and the services we offer better. By using this site, you agree to the use of cookies. [Learn more \(/DianaTools/index.php?r=site/terms\)](#).

I accept

|                 |                  |                                                                                      |                                                                                                                                                                                                                                                                                                                                                                                           |
|-----------------|------------------|--------------------------------------------------------------------------------------|-------------------------------------------------------------------------------------------------------------------------------------------------------------------------------------------------------------------------------------------------------------------------------------------------------------------------------------------------------------------------------------------|
| Tab3 (mmu) ⓘ    | mmu-miR-27a-3p ⓘ |    | 0.999<br><a href="(/DianaTools/index.php?r=microT_CDS/results&amp;keywords=mmu-miR-27a-3p%20ENSMUSG00000035476&amp;genes=ENSMUSG00000035476&amp;mirnas=mmu-miR-27a-3p&amp;threshold=0)">(/DianaTools/index.php?<br/>r=microT_CDS/results&amp;keywords=mmu-<br/>miR-27a-<br/>3p%20ENSMUSG00000035476&amp;genes=ENSMUSG00000035476&amp;mirnas=mmu-<br/>miR-27a-<br/>3p&amp;threshold=0)</a> |
| Tab3 (mmu) ⓘ    | mmu-miR-27a-3p ⓘ |    | 0.999<br><a href="(/DianaTools/index.php?r=microT_CDS/results&amp;keywords=mmu-miR-27a-3p%20ENSMUSG00000035476&amp;genes=ENSMUSG00000035476&amp;mirnas=mmu-miR-27a-3p&amp;threshold=0)">(/DianaTools/index.php?<br/>r=microT_CDS/results&amp;keywords=mmu-<br/>miR-27a-<br/>3p%20ENSMUSG00000035476&amp;genes=ENSMUSG00000035476&amp;mirnas=mmu-<br/>miR-27a-<br/>3p&amp;threshold=0)</a> |
| Fbxo33 (mmu) ⓘ  | mmu-miR-27a-3p ⓘ |    | 0.999<br><a href="(/DianaTools/index.php?r=microT_CDS/results&amp;keywords=mmu-miR-27a-3p%20ENSMUSG00000035329&amp;genes=ENSMUSG00000035329&amp;mirnas=mmu-miR-27a-3p&amp;threshold=0)">(/DianaTools/index.php?<br/>r=microT_CDS/results&amp;keywords=mmu-<br/>miR-27a-<br/>3p%20ENSMUSG00000035329&amp;genes=ENSMUSG00000035329&amp;mirnas=mmu-<br/>miR-27a-<br/>3p&amp;threshold=0)</a> |
| Cacna1a (mmu) ⓘ | mmu-miR-27a-3p ⓘ |    | 0.991<br><a href="(/DianaTools/index.php?r=microT_CDS/results&amp;keywords=mmu-miR-27a-3p%20ENSMUSG00000034656&amp;genes=ENSMUSG00000034656&amp;mirnas=mmu-miR-27a-3p&amp;threshold=0)">(/DianaTools/index.php?<br/>r=microT_CDS/results&amp;keywords=mmu-<br/>miR-27a-<br/>3p%20ENSMUSG00000034656&amp;genes=ENSMUSG00000034656&amp;mirnas=mmu-<br/>miR-27a-<br/>3p&amp;threshold=0)</a> |
| Cep135 (mmu) ⓘ  | mmu-miR-27a-3p ⓘ |    | 0.990<br><a href="(/DianaTools/index.php?r=microT_CDS/results&amp;keywords=mmu-miR-27a-3p%20ENSMUSG00000036403&amp;genes=ENSMUSG00000036403&amp;mirnas=mmu-miR-27a-3p&amp;threshold=0)">(/DianaTools/index.php?<br/>r=microT_CDS/results&amp;keywords=mmu-<br/>miR-27a-<br/>3p%20ENSMUSG00000036403&amp;genes=ENSMUSG00000036403&amp;mirnas=mmu-<br/>miR-27a-<br/>3p&amp;threshold=0)</a> |
| Gns (mmu) ⓘ     | mmu-miR-27a-3p ⓘ |    | 0.989<br><a href="(/DianaTools/index.php?r=microT_CDS/results&amp;keywords=mmu-miR-27a-3p%20ENSMUSG00000034707&amp;genes=ENSMUSG00000034707&amp;mirnas=mmu-miR-27a-3p&amp;threshold=0)">(/DianaTools/index.php?<br/>r=microT_CDS/results&amp;keywords=mmu-<br/>miR-27a-<br/>3p%20ENSMUSG00000034707&amp;genes=ENSMUSG00000034707&amp;mirnas=mmu-<br/>miR-27a-<br/>3p&amp;threshold=0)</a> |
| Gns (mmu) ⓘ     | mmu-miR-27a-3p ⓘ |    | 0.989<br><a href="(/DianaTools/index.php?r=microT_CDS/results&amp;keywords=mmu-miR-27a-3p%20ENSMUSG00000034707&amp;genes=ENSMUSG00000034707&amp;mirnas=mmu-miR-27a-3p&amp;threshold=0)">(/DianaTools/index.php?<br/>r=microT_CDS/results&amp;keywords=mmu-<br/>miR-27a-<br/>3p%20ENSMUSG00000034707&amp;genes=ENSMUSG00000034707&amp;mirnas=mmu-<br/>miR-27a-<br/>3p&amp;threshold=0)</a> |
| Dusp5 (mmu) ⓘ   | mmu-miR-27a-3p ⓘ |  | 0.949<br><a href="(/DianaTools/index.php?r=microT_CDS/results&amp;keywords=mmu-miR-27a-3p%20ENSMUSG00000034765&amp;genes=ENSMUSG00000034765&amp;mirnas=mmu-miR-27a-3p&amp;threshold=0)">(/DianaTools/index.php?<br/>r=microT_CDS/results&amp;keywords=mmu-<br/>miR-27a-<br/>3p%20ENSMUSG00000034765&amp;genes=ENSMUSG00000034765&amp;mirnas=mmu-<br/>miR-27a-<br/>3p&amp;threshold=0)</a> |
| Hmgxb4 (mmu) ⓘ  | mmu-miR-27a-3p ⓘ |  | 0.940<br><a href="(/DianaTools/index.php?r=microT_CDS/results&amp;keywords=mmu-miR-27a-3p%20ENSMUSG00000034518&amp;genes=ENSMUSG00000034518&amp;mirnas=mmu-miR-27a-3p&amp;threshold=0)">(/DianaTools/index.php?<br/>r=microT_CDS/results&amp;keywords=mmu-<br/>miR-27a-<br/>3p%20ENSMUSG00000034518&amp;genes=ENSMUSG00000034518&amp;mirnas=mmu-<br/>miR-27a-<br/>3p&amp;threshold=0)</a> |
| Sec24a (mmu) ⓘ  | mmu-miR-27a-3p ⓘ |  | 0.931<br><a href="(/DianaTools/index.php?r=microT_CDS/results&amp;keywords=mmu-miR-27a-3p%20ENSMUSG00000036391&amp;genes=ENSMUSG00000036391&amp;mirnas=mmu-miR-27a-3p&amp;threshold=0)">(/DianaTools/index.php?<br/>r=microT_CDS/results&amp;keywords=mmu-<br/>miR-27a-<br/>3p%20ENSMUSG00000036391&amp;genes=ENSMUSG00000036391&amp;mirnas=mmu-<br/>miR-27a-<br/>3p&amp;threshold=0)</a> |
| Btg1 (mmu) ⓘ    | mmu-miR-27a-3p ⓘ |  | 0.920<br><a href="(/DianaTools/index.php?r=microT_CDS/results&amp;keywords=mmu-miR-27a-3p%20ENSMUSG00000036478&amp;genes=ENSMUSG00000036478&amp;mirnas=mmu-miR-27a-3p&amp;threshold=0)">(/DianaTools/index.php?<br/>r=microT_CDS/results&amp;keywords=mmu-<br/>miR-27a-<br/>3p%20ENSMUSG00000036478&amp;genes=ENSMUSG00000036478&amp;mirnas=mmu-<br/>miR-27a-<br/>3p&amp;threshold=0)</a> |

We have placed cookies on your device to help make this website and the services we offer better. By using this site, you agree to the use of cookies. [Learn more](#) ([\(/DianaTools/index.php?r=site/terms\)]((/DianaTools/index.php?r=site/terms)))

I accept

|                 |                  |    |                                                                                                                                                                                  |
|-----------------|------------------|----|----------------------------------------------------------------------------------------------------------------------------------------------------------------------------------|
| Aldh5a1 (mmu) ⓘ | mmu-miR-27a-3p ⓘ | IP | 0.918<br>(/DianaTools/index.php?<br>r=miroT_CDS/results&keywords=mmu-<br>miR-27a-<br>3p%20ENSMUSG00000035936&genes=ENSMUSG00000035936&mirnas=mmu-<br>miR-27a-<br>3p&threshold=0) |
| Gxylt1 (mmu) ⓘ  | mmu-miR-27a-3p ⓘ | IP | 0.905<br>(/DianaTools/index.php?<br>r=miroT_CDS/results&keywords=mmu-<br>miR-27a-<br>3p%20ENSMUSG00000036197&genes=ENSMUSG00000036197&mirnas=mmu-<br>miR-27a-<br>3p&threshold=0) |
| Zfp395 (mmu) ⓘ  | mmu-miR-27a-3p ⓘ | IP | 0.890<br>(/DianaTools/index.php?<br>r=miroT_CDS/results&keywords=mmu-<br>miR-27a-<br>3p%20ENSMUSG00000034522&genes=ENSMUSG00000034522&mirnas=mmu-<br>miR-27a-<br>3p&threshold=0) |
| Fnip1 (mmu) ⓘ   | mmu-miR-27a-3p ⓘ | IP | 0.869<br>(/DianaTools/index.php?<br>r=miroT_CDS/results&keywords=mmu-<br>miR-27a-<br>3p%20ENSMUSG00000035992&genes=ENSMUSG00000035992&mirnas=mmu-<br>miR-27a-<br>3p&threshold=0) |
| Tmtc2 (mmu) ⓘ   | mmu-miR-27a-3p ⓘ | IP | 0.864<br>(/DianaTools/index.php?<br>r=miroT_CDS/results&keywords=mmu-<br>miR-27a-<br>3p%20ENSMUSG00000036019&genes=ENSMUSG00000036019&mirnas=mmu-<br>miR-27a-<br>3p&threshold=0) |
| Tet3 (mmu) ⓘ    | mmu-miR-27a-3p ⓘ | IP | 0.790<br>(/DianaTools/index.php?<br>r=miroT_CDS/results&keywords=mmu-<br>miR-27a-<br>3p%20ENSMUSG00000034832&genes=ENSMUSG00000034832&mirnas=mmu-<br>miR-27a-<br>3p&threshold=0) |
| Tet3 (mmu) ⓘ    | mmu-miR-27a-3p ⓘ | IP | 0.790<br>(/DianaTools/index.php?<br>r=miroT_CDS/results&keywords=mmu-<br>miR-27a-<br>3p%20ENSMUSG00000034832&genes=ENSMUSG00000034832&mirnas=mmu-<br>miR-27a-<br>3p&threshold=0) |
| Gng12 (mmu) ⓘ   | mmu-miR-27a-3p ⓘ | IP | 0.780<br>(/DianaTools/index.php?<br>r=miroT_CDS/results&keywords=mmu-<br>miR-27a-<br>3p%20ENSMUSG00000036402&genes=ENSMUSG00000036402&mirnas=mmu-<br>miR-27a-<br>3p&threshold=0) |
| Plekhl1 (mmu) ⓘ | mmu-miR-27a-3p ⓘ | IP | 0.777<br>(/DianaTools/index.php?<br>r=miroT_CDS/results&keywords=mmu-<br>miR-27a-<br>3p%20ENSMUSG00000035278&genes=ENSMUSG00000035278&mirnas=mmu-<br>miR-27a-<br>3p&threshold=0) |
| Plekhl1 (mmu) ⓘ | mmu-miR-27a-3p ⓘ | IP | 0.777<br>(/DianaTools/index.php?<br>r=miroT_CDS/results&keywords=mmu-<br>miR-27a-<br>3p%20ENSMUSG00000035278&genes=ENSMUSG00000035278&mirnas=mmu-<br>miR-27a-<br>3p&threshold=0) |
| Melk (mmu) ⓘ    | mmu-miR-27a-3p ⓘ | IP | 0.758<br>(/DianaTools/index.php?<br>r=miroT_CDS/results&keywords=mmu-<br>miR-27a-<br>3p%20ENSMUSG00000035683&genes=ENSMUSG00000035683&mirnas=mmu-<br>miR-27a-<br>3p&threshold=0) |

We have placed cookies on your device to help make this website and the services we offer better. By using this site, you agree to the use of cookies. [Learn more](#) (</DianaTools/index.php?r=site/terms>).

I accept

|                |                  |                                                                                      |                                                                                                                                                                                                                                                                                                                                                                                           |
|----------------|------------------|--------------------------------------------------------------------------------------|-------------------------------------------------------------------------------------------------------------------------------------------------------------------------------------------------------------------------------------------------------------------------------------------------------------------------------------------------------------------------------------------|
| Rmi1 (mmu) ⓘ   | mmu-miR-27a-3p ⓘ |    | 0.671<br><a href="(/DianaTools/index.php?r=microT_CDS/results&amp;keywords=mmu-miR-27a-3p%20ENSMUSG00000035367&amp;genes=ENSMUSG00000035367&amp;mirnas=mmu-miR-27a-3p&amp;threshold=0)">(/DianaTools/index.php?<br/>r=microT_CDS/results&amp;keywords=mmu-<br/>miR-27a-<br/>3p%20ENSMUSG00000035367&amp;genes=ENSMUSG00000035367&amp;mirnas=mmu-<br/>miR-27a-<br/>3p&amp;threshold=0)</a> |
| Dhcr24 (mmu) ⓘ | mmu-miR-27a-3p ⓘ |    | 0.666<br><a href="(/DianaTools/index.php?r=microT_CDS/results&amp;keywords=mmu-miR-27a-3p%20ENSMUSG00000034926&amp;genes=ENSMUSG00000034926&amp;mirnas=mmu-miR-27a-3p&amp;threshold=0)">(/DianaTools/index.php?<br/>r=microT_CDS/results&amp;keywords=mmu-<br/>miR-27a-<br/>3p%20ENSMUSG00000034926&amp;genes=ENSMUSG00000034926&amp;mirnas=mmu-<br/>miR-27a-<br/>3p&amp;threshold=0)</a> |
| Dhcr24 (mmu) ⓘ | mmu-miR-27a-3p ⓘ |    | 0.666<br><a href="(/DianaTools/index.php?r=microT_CDS/results&amp;keywords=mmu-miR-27a-3p%20ENSMUSG00000034926&amp;genes=ENSMUSG00000034926&amp;mirnas=mmu-miR-27a-3p&amp;threshold=0)">(/DianaTools/index.php?<br/>r=microT_CDS/results&amp;keywords=mmu-<br/>miR-27a-<br/>3p%20ENSMUSG00000034926&amp;genes=ENSMUSG00000034926&amp;mirnas=mmu-<br/>miR-27a-<br/>3p&amp;threshold=0)</a> |
| Bmp2k (mmu) ⓘ  | mmu-miR-27a-3p ⓘ |    | 0.654<br><a href="(/DianaTools/index.php?r=microT_CDS/results&amp;keywords=mmu-miR-27a-3p%20ENSMUSG00000034663&amp;genes=ENSMUSG00000034663&amp;mirnas=mmu-miR-27a-3p&amp;threshold=0)">(/DianaTools/index.php?<br/>r=microT_CDS/results&amp;keywords=mmu-<br/>miR-27a-<br/>3p%20ENSMUSG00000034663&amp;genes=ENSMUSG00000034663&amp;mirnas=mmu-<br/>miR-27a-<br/>3p&amp;threshold=0)</a> |
| Serbp1 (mmu) ⓘ | mmu-miR-27a-3p ⓘ |    | 0.645<br><a href="(/DianaTools/index.php?r=microT_CDS/results&amp;keywords=mmu-miR-27a-3p%20ENSMUSG00000036371&amp;genes=ENSMUSG00000036371&amp;mirnas=mmu-miR-27a-3p&amp;threshold=0)">(/DianaTools/index.php?<br/>r=microT_CDS/results&amp;keywords=mmu-<br/>miR-27a-<br/>3p%20ENSMUSG00000036371&amp;genes=ENSMUSG00000036371&amp;mirnas=mmu-<br/>miR-27a-<br/>3p&amp;threshold=0)</a> |
| Serbp1 (mmu) ⓘ | mmu-miR-27a-3p ⓘ |    | 0.645<br><a href="(/DianaTools/index.php?r=microT_CDS/results&amp;keywords=mmu-miR-27a-3p%20ENSMUSG00000036371&amp;genes=ENSMUSG00000036371&amp;mirnas=mmu-miR-27a-3p&amp;threshold=0)">(/DianaTools/index.php?<br/>r=microT_CDS/results&amp;keywords=mmu-<br/>miR-27a-<br/>3p%20ENSMUSG00000036371&amp;genes=ENSMUSG00000036371&amp;mirnas=mmu-<br/>miR-27a-<br/>3p&amp;threshold=0)</a> |
| Zyg11b (mmu) ⓘ | mmu-miR-27a-3p ⓘ |    | 0.639<br><a href="(/DianaTools/index.php?r=microT_CDS/results&amp;keywords=mmu-miR-27a-3p%20ENSMUSG00000034636&amp;genes=ENSMUSG00000034636&amp;mirnas=mmu-miR-27a-3p&amp;threshold=0)">(/DianaTools/index.php?<br/>r=microT_CDS/results&amp;keywords=mmu-<br/>miR-27a-<br/>3p%20ENSMUSG00000034636&amp;genes=ENSMUSG00000034636&amp;mirnas=mmu-<br/>miR-27a-<br/>3p&amp;threshold=0)</a> |
| Cog3 (mmu) ⓘ   | mmu-miR-27a-3p ⓘ |  | 0.618<br><a href="(/DianaTools/index.php?r=microT_CDS/results&amp;keywords=mmu-miR-27a-3p%20ENSMUSG00000034893&amp;genes=ENSMUSG00000034893&amp;mirnas=mmu-miR-27a-3p&amp;threshold=0)">(/DianaTools/index.php?<br/>r=microT_CDS/results&amp;keywords=mmu-<br/>miR-27a-<br/>3p%20ENSMUSG00000034893&amp;genes=ENSMUSG00000034893&amp;mirnas=mmu-<br/>miR-27a-<br/>3p&amp;threshold=0)</a> |
| Cog3 (mmu) ⓘ   | mmu-miR-27a-3p ⓘ |  | 0.618<br><a href="(/DianaTools/index.php?r=microT_CDS/results&amp;keywords=mmu-miR-27a-3p%20ENSMUSG00000034893&amp;genes=ENSMUSG00000034893&amp;mirnas=mmu-miR-27a-3p&amp;threshold=0)">(/DianaTools/index.php?<br/>r=microT_CDS/results&amp;keywords=mmu-<br/>miR-27a-<br/>3p%20ENSMUSG00000034893&amp;genes=ENSMUSG00000034893&amp;mirnas=mmu-<br/>miR-27a-<br/>3p&amp;threshold=0)</a> |
| Anky2 (mmu) ⓘ  | mmu-miR-27a-3p ⓘ |  | 0.606<br><a href="(/DianaTools/index.php?r=microT_CDS/results&amp;keywords=mmu-miR-27a-3p%20ENSMUSG00000036188&amp;genes=ENSMUSG00000036188&amp;mirnas=mmu-miR-27a-3p&amp;threshold=0)">(/DianaTools/index.php?<br/>r=microT_CDS/results&amp;keywords=mmu-<br/>miR-27a-<br/>3p%20ENSMUSG00000036188&amp;genes=ENSMUSG00000036188&amp;mirnas=mmu-<br/>miR-27a-<br/>3p&amp;threshold=0)</a> |
| Anky2 (mmu) ⓘ  | mmu-miR-27a-3p ⓘ |  | 0.606<br><a href="(/DianaTools/index.php?r=microT_CDS/results&amp;keywords=mmu-miR-27a-3p%20ENSMUSG00000036188&amp;genes=ENSMUSG00000036188&amp;mirnas=mmu-miR-27a-3p&amp;threshold=0)">(/DianaTools/index.php?<br/>r=microT_CDS/results&amp;keywords=mmu-<br/>miR-27a-<br/>3p%20ENSMUSG00000036188&amp;genes=ENSMUSG00000036188&amp;mirnas=mmu-<br/>miR-27a-<br/>3p&amp;threshold=0)</a> |

We have placed cookies on your device to help make this website and the services we offer better. By using this site, you agree to the use of cookies. [Learn more](#) ([/DianaTools/index.php?r=site/terms]((/DianaTools/index.php?r=site/terms))).

I accept

|                |                  |                                                                                      |                                                                                                                                                                                                                                                                                                                                                                                           |
|----------------|------------------|--------------------------------------------------------------------------------------|-------------------------------------------------------------------------------------------------------------------------------------------------------------------------------------------------------------------------------------------------------------------------------------------------------------------------------------------------------------------------------------------|
| Cnot6l (mmu) ⓘ | mmu-miR-27a-3p ⓘ |    | 0.606<br><a href="(/DianaTools/index.php?r=microT_CDS/results&amp;keywords=mmu-miR-27a-3p%20ENSMUSG00000034724&amp;genes=ENSMUSG00000034724&amp;mirnas=mmu-miR-27a-3p&amp;threshold=0)">(/DianaTools/index.php?<br/>r=microT_CDS/results&amp;keywords=mmu-<br/>miR-27a-<br/>3p%20ENSMUSG00000034724&amp;genes=ENSMUSG00000034724&amp;mirnas=mmu-<br/>miR-27a-<br/>3p&amp;threshold=0)</a> |
| Supt16 (mmu) ⓘ | mmu-miR-27a-3p ⓘ |    | 0.602<br><a href="(/DianaTools/index.php?r=microT_CDS/results&amp;keywords=mmu-miR-27a-3p%20ENSMUSG00000035726&amp;genes=ENSMUSG00000035726&amp;mirnas=mmu-miR-27a-3p&amp;threshold=0)">(/DianaTools/index.php?<br/>r=microT_CDS/results&amp;keywords=mmu-<br/>miR-27a-<br/>3p%20ENSMUSG00000035726&amp;genes=ENSMUSG00000035726&amp;mirnas=mmu-<br/>miR-27a-<br/>3p&amp;threshold=0)</a> |
| Supt16 (mmu) ⓘ | mmu-miR-27a-3p ⓘ |    | 0.602<br><a href="(/DianaTools/index.php?r=microT_CDS/results&amp;keywords=mmu-miR-27a-3p%20ENSMUSG00000035726&amp;genes=ENSMUSG00000035726&amp;mirnas=mmu-miR-27a-3p&amp;threshold=0)">(/DianaTools/index.php?<br/>r=microT_CDS/results&amp;keywords=mmu-<br/>miR-27a-<br/>3p%20ENSMUSG00000035726&amp;genes=ENSMUSG00000035726&amp;mirnas=mmu-<br/>miR-27a-<br/>3p&amp;threshold=0)</a> |
| Synrg (mmu) ⓘ  | mmu-miR-27a-3p ⓘ |    | 0.600<br><a href="(/DianaTools/index.php?r=microT_CDS/results&amp;keywords=mmu-miR-27a-3p%20ENSMUSG00000034940&amp;genes=ENSMUSG00000034940&amp;mirnas=mmu-miR-27a-3p&amp;threshold=0)">(/DianaTools/index.php?<br/>r=microT_CDS/results&amp;keywords=mmu-<br/>miR-27a-<br/>3p%20ENSMUSG00000034940&amp;genes=ENSMUSG00000034940&amp;mirnas=mmu-<br/>miR-27a-<br/>3p&amp;threshold=0)</a> |
| Rundc1 (mmu) ⓘ | mmu-miR-27a-3p ⓘ |    | 0.593<br><a href="(/DianaTools/index.php?r=microT_CDS/results&amp;keywords=mmu-miR-27a-3p%20ENSMUSG00000035007&amp;genes=ENSMUSG00000035007&amp;mirnas=mmu-miR-27a-3p&amp;threshold=0)">(/DianaTools/index.php?<br/>r=microT_CDS/results&amp;keywords=mmu-<br/>miR-27a-<br/>3p%20ENSMUSG00000035007&amp;genes=ENSMUSG00000035007&amp;mirnas=mmu-<br/>miR-27a-<br/>3p&amp;threshold=0)</a> |
| Rundc1 (mmu) ⓘ | mmu-miR-27a-3p ⓘ |    | 0.593<br><a href="(/DianaTools/index.php?r=microT_CDS/results&amp;keywords=mmu-miR-27a-3p%20ENSMUSG00000035007&amp;genes=ENSMUSG00000035007&amp;mirnas=mmu-miR-27a-3p&amp;threshold=0)">(/DianaTools/index.php?<br/>r=microT_CDS/results&amp;keywords=mmu-<br/>miR-27a-<br/>3p%20ENSMUSG00000035007&amp;genes=ENSMUSG00000035007&amp;mirnas=mmu-<br/>miR-27a-<br/>3p&amp;threshold=0)</a> |
| Naa30 (mmu) ⓘ  | mmu-miR-27a-3p ⓘ |    | 0.588<br><a href="(/DianaTools/index.php?r=microT_CDS/results&amp;keywords=mmu-miR-27a-3p%20ENSMUSG00000036282&amp;genes=ENSMUSG00000036282&amp;mirnas=mmu-miR-27a-3p&amp;threshold=0)">(/DianaTools/index.php?<br/>r=microT_CDS/results&amp;keywords=mmu-<br/>miR-27a-<br/>3p%20ENSMUSG00000036282&amp;genes=ENSMUSG00000036282&amp;mirnas=mmu-<br/>miR-27a-<br/>3p&amp;threshold=0)</a> |
| Midn (mmu) ⓘ   | mmu-miR-27a-3p ⓘ |  | 0.580<br><a href="(/DianaTools/index.php?r=microT_CDS/results&amp;keywords=mmu-miR-27a-3p%20ENSMUSG00000035621&amp;genes=ENSMUSG00000035621&amp;mirnas=mmu-miR-27a-3p&amp;threshold=0)">(/DianaTools/index.php?<br/>r=microT_CDS/results&amp;keywords=mmu-<br/>miR-27a-<br/>3p%20ENSMUSG00000035621&amp;genes=ENSMUSG00000035621&amp;mirnas=mmu-<br/>miR-27a-<br/>3p&amp;threshold=0)</a> |
| Baz1a (mmu) ⓘ  | mmu-miR-27a-3p ⓘ |  | 0.580<br><a href="(/DianaTools/index.php?r=microT_CDS/results&amp;keywords=mmu-miR-27a-3p%20ENSMUSG00000035021&amp;genes=ENSMUSG00000035021&amp;mirnas=mmu-miR-27a-3p&amp;threshold=0)">(/DianaTools/index.php?<br/>r=microT_CDS/results&amp;keywords=mmu-<br/>miR-27a-<br/>3p%20ENSMUSG00000035021&amp;genes=ENSMUSG00000035021&amp;mirnas=mmu-<br/>miR-27a-<br/>3p&amp;threshold=0)</a> |
| Myl12b (mmu) ⓘ | mmu-miR-27a-3p ⓘ |  | 0.574<br><a href="(/DianaTools/index.php?r=microT_CDS/results&amp;keywords=mmu-miR-27a-3p%20ENSMUSG00000034868&amp;genes=ENSMUSG00000034868&amp;mirnas=mmu-miR-27a-3p&amp;threshold=0)">(/DianaTools/index.php?<br/>r=microT_CDS/results&amp;keywords=mmu-<br/>miR-27a-<br/>3p%20ENSMUSG00000034868&amp;genes=ENSMUSG00000034868&amp;mirnas=mmu-<br/>miR-27a-<br/>3p&amp;threshold=0)</a> |
| Pim3 (mmu) ⓘ   | mmu-miR-27a-3p ⓘ |  | 0.573<br><a href="(/DianaTools/index.php?r=microT_CDS/results&amp;keywords=mmu-miR-27a-3p%20ENSMUSG00000035828&amp;genes=ENSMUSG00000035828&amp;mirnas=mmu-miR-27a-3p&amp;threshold=0)">(/DianaTools/index.php?<br/>r=microT_CDS/results&amp;keywords=mmu-<br/>miR-27a-<br/>3p%20ENSMUSG00000035828&amp;genes=ENSMUSG00000035828&amp;mirnas=mmu-<br/>miR-27a-<br/>3p&amp;threshold=0)</a> |

We have placed cookies on your device to help make this website and the services we offer better. By using this site, you agree to the use of cookies. [Learn more](#) ([\(/DianaTools/index.php?r=site/terms\)]((/DianaTools/index.php?r=site/terms))).

I accept

|                       |                  |                                                                                      |                                                                                                                                                                                                                                                                                                                                                                                  |
|-----------------------|------------------|--------------------------------------------------------------------------------------|----------------------------------------------------------------------------------------------------------------------------------------------------------------------------------------------------------------------------------------------------------------------------------------------------------------------------------------------------------------------------------|
| Pim3 (mmu) ⓘ          | mmu-miR-27a-3p ⓘ |    | <a href="#">0.573</a><br><a href="(/DianaTools/index.php?r=microT_CDS/results&amp;keywords=mmu-miR-27a-3p%20ENSMUSG00000035828&amp;genes=ENSMUSG00000035828&amp;mirnas=mmu-miR-27a-3p&amp;threshold=0)">(/DianaTools/index.php?r=microT_CDS/results&amp;keywords=mmu-miR-27a-3p%20ENSMUSG00000035828&amp;genes=ENSMUSG00000035828&amp;mirnas=mmu-miR-27a-3p&amp;threshold=0)</a> |
| Eea1 (mmu) ⓘ          | mmu-miR-27a-3p ⓘ |    | <a href="#">0.572</a><br><a href="(/DianaTools/index.php?r=microT_CDS/results&amp;keywords=mmu-miR-27a-3p%20ENSMUSG00000036499&amp;genes=ENSMUSG00000036499&amp;mirnas=mmu-miR-27a-3p&amp;threshold=0)">(/DianaTools/index.php?r=microT_CDS/results&amp;keywords=mmu-miR-27a-3p%20ENSMUSG00000036499&amp;genes=ENSMUSG00000036499&amp;mirnas=mmu-miR-27a-3p&amp;threshold=0)</a> |
| A630007B06Rik (mmu) ⓘ | mmu-miR-27a-3p ⓘ |    | <a href="#">0.561</a><br><a href="(/DianaTools/index.php?r=microT_CDS/results&amp;keywords=mmu-miR-27a-3p%20ENSMUSG00000035173&amp;genes=ENSMUSG00000035173&amp;mirnas=mmu-miR-27a-3p&amp;threshold=0)">(/DianaTools/index.php?r=microT_CDS/results&amp;keywords=mmu-miR-27a-3p%20ENSMUSG00000035173&amp;genes=ENSMUSG00000035173&amp;mirnas=mmu-miR-27a-3p&amp;threshold=0)</a> |
| Srp72 (mmu) ⓘ         | mmu-miR-27a-3p ⓘ |    | <a href="#">0.556</a><br><a href="(/DianaTools/index.php?r=microT_CDS/results&amp;keywords=mmu-miR-27a-3p%20ENSMUSG00000036323&amp;genes=ENSMUSG00000036323&amp;mirnas=mmu-miR-27a-3p&amp;threshold=0)">(/DianaTools/index.php?r=microT_CDS/results&amp;keywords=mmu-miR-27a-3p%20ENSMUSG00000036323&amp;genes=ENSMUSG00000036323&amp;mirnas=mmu-miR-27a-3p&amp;threshold=0)</a> |
| Slc41a2 (mmu) ⓘ       | mmu-miR-27a-3p ⓘ |    | <a href="#">0.553</a><br><a href="(/DianaTools/index.php?r=microT_CDS/results&amp;keywords=mmu-miR-27a-3p%20ENSMUSG00000034591&amp;genes=ENSMUSG00000034591&amp;mirnas=mmu-miR-27a-3p&amp;threshold=0)">(/DianaTools/index.php?r=microT_CDS/results&amp;keywords=mmu-miR-27a-3p%20ENSMUSG00000034591&amp;genes=ENSMUSG00000034591&amp;mirnas=mmu-miR-27a-3p&amp;threshold=0)</a> |
| Parpbp (mmu) ⓘ        | mmu-miR-27a-3p ⓘ |    | <a href="#">0.547</a><br><a href="(/DianaTools/index.php?r=microT_CDS/results&amp;keywords=mmu-miR-27a-3p%20ENSMUSG00000035365&amp;genes=ENSMUSG00000035365&amp;mirnas=mmu-miR-27a-3p&amp;threshold=0)">(/DianaTools/index.php?r=microT_CDS/results&amp;keywords=mmu-miR-27a-3p%20ENSMUSG00000035365&amp;genes=ENSMUSG00000035365&amp;mirnas=mmu-miR-27a-3p&amp;threshold=0)</a> |
| Ids (mmu) ⓘ           | mmu-miR-27a-3p ⓘ |    | <a href="#">0.536</a><br><a href="(/DianaTools/index.php?r=microT_CDS/results&amp;keywords=mmu-miR-27a-3p%20ENSMUSG00000035847&amp;genes=ENSMUSG00000035847&amp;mirnas=mmu-miR-27a-3p&amp;threshold=0)">(/DianaTools/index.php?r=microT_CDS/results&amp;keywords=mmu-miR-27a-3p%20ENSMUSG00000035847&amp;genes=ENSMUSG00000035847&amp;mirnas=mmu-miR-27a-3p&amp;threshold=0)</a> |
| Elf1 (mmu) ⓘ          | mmu-miR-27a-3p ⓘ |  | <a href="#">0.530</a><br><a href="(/DianaTools/index.php?r=microT_CDS/results&amp;keywords=mmu-miR-27a-3p%20ENSMUSG00000036461&amp;genes=ENSMUSG00000036461&amp;mirnas=mmu-miR-27a-3p&amp;threshold=0)">(/DianaTools/index.php?r=microT_CDS/results&amp;keywords=mmu-miR-27a-3p%20ENSMUSG00000036461&amp;genes=ENSMUSG00000036461&amp;mirnas=mmu-miR-27a-3p&amp;threshold=0)</a> |
| Zhx3 (mmu) ⓘ          | mmu-miR-27a-3p ⓘ |  | <a href="#">0.520</a><br><a href="(/DianaTools/index.php?r=microT_CDS/results&amp;keywords=mmu-miR-27a-3p%20ENSMUSG00000035877&amp;genes=ENSMUSG00000035877&amp;mirnas=mmu-miR-27a-3p&amp;threshold=0)">(/DianaTools/index.php?r=microT_CDS/results&amp;keywords=mmu-miR-27a-3p%20ENSMUSG00000035877&amp;genes=ENSMUSG00000035877&amp;mirnas=mmu-miR-27a-3p&amp;threshold=0)</a> |
| Grip1 (mmu) ⓘ         | mmu-miR-27a-3p ⓘ |  | <a href="#">0.516</a><br><a href="(/DianaTools/index.php?r=microT_CDS/results&amp;keywords=mmu-miR-27a-3p%20ENSMUSG00000034813&amp;genes=ENSMUSG00000034813&amp;mirnas=mmu-miR-27a-3p&amp;threshold=0)">(/DianaTools/index.php?r=microT_CDS/results&amp;keywords=mmu-miR-27a-3p%20ENSMUSG00000034813&amp;genes=ENSMUSG00000034813&amp;mirnas=mmu-miR-27a-3p&amp;threshold=0)</a> |
| Pcdh17 (mmu) ⓘ        | mmu-miR-27a-3p ⓘ |  | <a href="#">0.514</a><br><a href="(/DianaTools/index.php?r=microT_CDS/results&amp;keywords=mmu-miR-27a-3p%20ENSMUSG00000035566&amp;genes=ENSMUSG00000035566&amp;mirnas=mmu-miR-27a-3p&amp;threshold=0)">(/DianaTools/index.php?r=microT_CDS/results&amp;keywords=mmu-miR-27a-3p%20ENSMUSG00000035566&amp;genes=ENSMUSG00000035566&amp;mirnas=mmu-miR-27a-3p&amp;threshold=0)</a> |

We have placed cookies on your device to help make this website and the services we offer better. By using this site, you agree to the use of cookies. [Learn more](#) ([\(/DianaTools/index.php?r=site/terms\)]((/DianaTools/index.php?r=site/terms)))

I accept

|                   |                  |                                                                                      |                                                                                                                                                                                                                                                                                                                                                                  |
|-------------------|------------------|--------------------------------------------------------------------------------------|------------------------------------------------------------------------------------------------------------------------------------------------------------------------------------------------------------------------------------------------------------------------------------------------------------------------------------------------------------------|
| Grand4 (mmu) ⓘ    | mmu-miR-27a-3p ⓘ |    | 0.483<br><a href="(/DianaTools/index.php?r=microT_CDS/results&amp;keywords=mmu-miR-27a-3p%20ENSMUSG00000035900&amp;genes=ENSMUSG00000035900&amp;mirnas=mmu-miR-27a-3p&amp;threshold=0)">(/DianaTools/index.php?r=microT_CDS/results&amp;keywords=mmu-miR-27a-3p%20ENSMUSG00000035900&amp;genes=ENSMUSG00000035900&amp;mirnas=mmu-miR-27a-3p&amp;threshold=0)</a> |
| Rabgap1 (mmu) ⓘ   | mmu-miR-27a-3p ⓘ |    | 0.478<br><a href="(/DianaTools/index.php?r=microT_CDS/results&amp;keywords=mmu-miR-27a-3p%20ENSMUSG00000035437&amp;genes=ENSMUSG00000035437&amp;mirnas=mmu-miR-27a-3p&amp;threshold=0)">(/DianaTools/index.php?r=microT_CDS/results&amp;keywords=mmu-miR-27a-3p%20ENSMUSG00000035437&amp;genes=ENSMUSG00000035437&amp;mirnas=mmu-miR-27a-3p&amp;threshold=0)</a> |
| Secisbp2l (mmu) ⓘ | mmu-miR-27a-3p ⓘ |    | 0.473<br><a href="(/DianaTools/index.php?r=microT_CDS/results&amp;keywords=mmu-miR-27a-3p%20ENSMUSG00000035093&amp;genes=ENSMUSG00000035093&amp;mirnas=mmu-miR-27a-3p&amp;threshold=0)">(/DianaTools/index.php?r=microT_CDS/results&amp;keywords=mmu-miR-27a-3p%20ENSMUSG00000035093&amp;genes=ENSMUSG00000035093&amp;mirnas=mmu-miR-27a-3p&amp;threshold=0)</a> |
| Ap5m1 (mmu) ⓘ     | mmu-miR-27a-3p ⓘ |    | 0.468<br><a href="(/DianaTools/index.php?r=microT_CDS/results&amp;keywords=mmu-miR-27a-3p%20ENSMUSG00000036291&amp;genes=ENSMUSG00000036291&amp;mirnas=mmu-miR-27a-3p&amp;threshold=0)">(/DianaTools/index.php?r=microT_CDS/results&amp;keywords=mmu-miR-27a-3p%20ENSMUSG00000036291&amp;genes=ENSMUSG00000036291&amp;mirnas=mmu-miR-27a-3p&amp;threshold=0)</a> |
| Polr3g (mmu) ⓘ    | mmu-miR-27a-3p ⓘ |    | 0.466<br><a href="(/DianaTools/index.php?r=microT_CDS/results&amp;keywords=mmu-miR-27a-3p%20ENSMUSG00000035834&amp;genes=ENSMUSG00000035834&amp;mirnas=mmu-miR-27a-3p&amp;threshold=0)">(/DianaTools/index.php?r=microT_CDS/results&amp;keywords=mmu-miR-27a-3p%20ENSMUSG00000035834&amp;genes=ENSMUSG00000035834&amp;mirnas=mmu-miR-27a-3p&amp;threshold=0)</a> |
| Wdr18 (mmu) ⓘ     | mmu-miR-27a-3p ⓘ |    | 0.461<br><a href="(/DianaTools/index.php?r=microT_CDS/results&amp;keywords=mmu-miR-27a-3p%20ENSMUSG00000035754&amp;genes=ENSMUSG00000035754&amp;mirnas=mmu-miR-27a-3p&amp;threshold=0)">(/DianaTools/index.php?r=microT_CDS/results&amp;keywords=mmu-miR-27a-3p%20ENSMUSG00000035754&amp;genes=ENSMUSG00000035754&amp;mirnas=mmu-miR-27a-3p&amp;threshold=0)</a> |
| Gna11 (mmu) ⓘ     | mmu-miR-27a-3p ⓘ |    | 0.453<br><a href="(/DianaTools/index.php?r=microT_CDS/results&amp;keywords=mmu-miR-27a-3p%20ENSMUSG00000034781&amp;genes=ENSMUSG00000034781&amp;mirnas=mmu-miR-27a-3p&amp;threshold=0)">(/DianaTools/index.php?r=microT_CDS/results&amp;keywords=mmu-miR-27a-3p%20ENSMUSG00000034781&amp;genes=ENSMUSG00000034781&amp;mirnas=mmu-miR-27a-3p&amp;threshold=0)</a> |
| C8a (mmu) ⓘ       | mmu-miR-27a-3p ⓘ |  | -                                                                                                                                                                                                                                                                                                                                                                |
| Lin54 (mmu) ⓘ     | mmu-miR-27a-3p ⓘ |  | -                                                                                                                                                                                                                                                                                                                                                                |
| Dopey1 (mmu) ⓘ    | mmu-miR-27a-3p ⓘ |  | -                                                                                                                                                                                                                                                                                                                                                                |
| Rabgap1 (mmu) ⓘ   | mmu-miR-27a-3p ⓘ |  | -                                                                                                                                                                                                                                                                                                                                                                |
| Ccp1 (mmu) ⓘ      | mmu-miR-27a-3p ⓘ |  | -                                                                                                                                                                                                                                                                                                                                                                |
| Stab2 (mmu) ⓘ     | mmu-miR-27a-3p ⓘ |  | -                                                                                                                                                                                                                                                                                                                                                                |
| Pnpla8 (mmu) ⓘ    | mmu-miR-27a-3p ⓘ |  | -                                                                                                                                                                                                                                                                                                                                                                |
| Hectd1 (mmu) ⓘ    | mmu-miR-27a-3p ⓘ |  | -                                                                                                                                                                                                                                                                                                                                                                |
| Ncapd3 (mmu) ⓘ    | mmu-miR-27a-3p ⓘ |  | -                                                                                                                                                                                                                                                                                                                                                                |
| Mgat5 (mmu) ⓘ     | mmu-miR-27a-3p ⓘ |  | -                                                                                                                                                                                                                                                                                                                                                                |
| Ndufa3 (mmu) ⓘ    | mmu-miR-27a-3p ⓘ |  | -                                                                                                                                                                                                                                                                                                                                                                |
| Fmn12 (mmu) ⓘ     | mmu-miR-27a-3p ⓘ |  | -                                                                                                                                                                                                                                                                                                                                                                |

We have placed cookies on your device to help make this website and the services we offer better. By using this site, you agree to the use of cookies. [Learn more \(/DianaTools/index.php?r=site/terms\)]((/DianaTools/index.php?r=site/terms))

I accept

|                       |                  |    |   |
|-----------------------|------------------|----|---|
| Pnpla8 (mmu) ⓘ        | mmu-miR-27a-3p ⓘ | IP | - |
| Neurod1 (mmu) ⓘ       | mmu-miR-27a-3p ⓘ | IP | - |
| Ggta1 (mmu) ⓘ         | mmu-miR-27a-3p ⓘ | IP | - |
| Neu3 (mmu) ⓘ          | mmu-miR-27a-3p ⓘ | IP | - |
| Myo5a (mmu) ⓘ         | mmu-miR-27a-3p ⓘ | IP | - |
| Daam1 (mmu) ⓘ         | mmu-miR-27a-3p ⓘ | IP | - |
| Adrb1 (mmu) ⓘ         | mmu-miR-27a-3p ⓘ | IP | - |
| Gnptab (mmu) ⓘ        | mmu-miR-27a-3p ⓘ | IP | - |
| Gnptab (mmu) ⓘ        | mmu-miR-27a-3p ⓘ | IP | - |
| Lrrn1 (mmu) ⓘ         | mmu-miR-27a-3p ⓘ | IP | - |
| Cog5 (mmu) ⓘ          | mmu-miR-27a-3p ⓘ | IP | - |
| Arhgap5 (mmu) ⓘ       | mmu-miR-27a-3p ⓘ | IP | - |
| 9530068E07Rik (mmu) ⓘ | mmu-miR-27a-3p ⓘ | IP | - |
| Ppp1r11 (mmu) ⓘ       | mmu-miR-27a-3p ⓘ | IP | - |
| Mgat5 (mmu) ⓘ         | mmu-miR-27a-3p ⓘ | IP | - |
| Ndufa3 (mmu) ⓘ        | mmu-miR-27a-3p ⓘ | IP | - |
| Eef2 (mmu) ⓘ          | mmu-miR-27a-3p ⓘ | IP | - |
| Slc38a7 (mmu) ⓘ       | mmu-miR-27a-3p ⓘ | IP | - |
| Grn (mmu) ⓘ           | mmu-miR-27a-3p ⓘ | IP | - |
| Skp1a (mmu) ⓘ         | mmu-miR-27a-3p ⓘ | IP | - |
| Thap11 (mmu) ⓘ        | mmu-miR-27a-3p ⓘ | IP | - |
| Rnf38 (mmu) ⓘ         | mmu-miR-27a-3p ⓘ | IP | - |
| Spcs2 (mmu) ⓘ         | mmu-miR-27a-3p ⓘ | IP | - |
| Lrrn3 (mmu) ⓘ         | mmu-miR-27a-3p ⓘ | IP | - |
| Ap2b1 (mmu) ⓘ         | mmu-miR-27a-3p ⓘ | IP | - |
| Kidins220 (mmu) ⓘ     | mmu-miR-27a-3p ⓘ | IP | - |

|               |                  |    |                                                                                                                                                                                                                                                                                                                                                        |
|---------------|------------------|----|--------------------------------------------------------------------------------------------------------------------------------------------------------------------------------------------------------------------------------------------------------------------------------------------------------------------------------------------------------|
| Stag1 (mmu) ⓘ | mmu-miR-27a-3p ⓘ | IP | <p><b>0.999</b><br/> <a href="/DianaTools/index.php?r=miroT_CDS/results&amp;keywords=mmu-miR-27a-3p%20ENSMUSG00000037286&amp;genes=ENSMUSG00000037286&amp;miR-27a-3p&amp;threshold=0">(/DianaTools/index.php?r=miroT_CDS/results&amp;keywords=mmu-miR-27a-3p%20ENSMUSG00000037286&amp;genes=ENSMUSG00000037286&amp;miR-27a-3p&amp;threshold=0)</a></p> |
|---------------|------------------|----|--------------------------------------------------------------------------------------------------------------------------------------------------------------------------------------------------------------------------------------------------------------------------------------------------------------------------------------------------------|

|              |                  |    |                                                                                                                                                                                                                                                                                                                                                                              |
|--------------|------------------|----|------------------------------------------------------------------------------------------------------------------------------------------------------------------------------------------------------------------------------------------------------------------------------------------------------------------------------------------------------------------------------|
| Ubr5 (mmu) ⓘ | mmu-miR-27a-3p ⓘ | IP | <p><b>0.989</b><br/> <a href="/DianaTools/index.php?r=miroT_CDS/results&amp;keywords=mmu-miR-27a-3p%20ENSMUSG00000037487&amp;genes=ENSMUSG00000037487&amp;mirnas=mmu-miR-27a-3p&amp;threshold=0">(/DianaTools/index.php?r=miroT_CDS/results&amp;keywords=mmu-miR-27a-3p%20ENSMUSG00000037487&amp;genes=ENSMUSG00000037487&amp;mirnas=mmu-miR-27a-3p&amp;threshold=0)</a></p> |
|--------------|------------------|----|------------------------------------------------------------------------------------------------------------------------------------------------------------------------------------------------------------------------------------------------------------------------------------------------------------------------------------------------------------------------------|

We have placed cookies on your device to help make this website and the services we offer better. By using this site, you agree to the use of cookies. [Learn more](#) (</DianaTools/index.php?r=site/terms>).

I accept



|                |                  |                                                                                      |                                                                                                                                                                                                                                                                                                                                                                                           |
|----------------|------------------|--------------------------------------------------------------------------------------|-------------------------------------------------------------------------------------------------------------------------------------------------------------------------------------------------------------------------------------------------------------------------------------------------------------------------------------------------------------------------------------------|
| Rnf139 (mmu) ⓘ | mmu-miR-27a-3p ⓘ |    | 0.954<br><a href="(/DianaTools/index.php?r=microT_CDS/results&amp;keywords=mmu-miR-27a-3p%20ENSMUSG00000037075&amp;genes=ENSMUSG00000037075&amp;mirnas=mmu-miR-27a-3p&amp;threshold=0)">(/DianaTools/index.php?<br/>r=microT_CDS/results&amp;keywords=mmu-<br/>miR-27a-<br/>3p%20ENSMUSG00000037075&amp;genes=ENSMUSG00000037075&amp;mirnas=mmu-<br/>miR-27a-<br/>3p&amp;threshold=0)</a> |
| Rnf139 (mmu) ⓘ | mmu-miR-27a-3p ⓘ |    | 0.954<br><a href="(/DianaTools/index.php?r=microT_CDS/results&amp;keywords=mmu-miR-27a-3p%20ENSMUSG00000037075&amp;genes=ENSMUSG00000037075&amp;mirnas=mmu-miR-27a-3p&amp;threshold=0)">(/DianaTools/index.php?<br/>r=microT_CDS/results&amp;keywords=mmu-<br/>miR-27a-<br/>3p%20ENSMUSG00000037075&amp;genes=ENSMUSG00000037075&amp;mirnas=mmu-<br/>miR-27a-<br/>3p&amp;threshold=0)</a> |
| Ago2 (mmu) ⓘ   | mmu-miR-27a-3p ⓘ |    | 0.934<br><a href="(/DianaTools/index.php?r=microT_CDS/results&amp;keywords=mmu-miR-27a-3p%20ENSMUSG00000036698&amp;genes=ENSMUSG00000036698&amp;mirnas=mmu-miR-27a-3p&amp;threshold=0)">(/DianaTools/index.php?<br/>r=microT_CDS/results&amp;keywords=mmu-<br/>miR-27a-<br/>3p%20ENSMUSG00000036698&amp;genes=ENSMUSG00000036698&amp;mirnas=mmu-<br/>miR-27a-<br/>3p&amp;threshold=0)</a> |
| Ago2 (mmu) ⓘ   | mmu-miR-27a-3p ⓘ |    | 0.934<br><a href="(/DianaTools/index.php?r=microT_CDS/results&amp;keywords=mmu-miR-27a-3p%20ENSMUSG00000036698&amp;genes=ENSMUSG00000036698&amp;mirnas=mmu-miR-27a-3p&amp;threshold=0)">(/DianaTools/index.php?<br/>r=microT_CDS/results&amp;keywords=mmu-<br/>miR-27a-<br/>3p%20ENSMUSG00000036698&amp;genes=ENSMUSG00000036698&amp;mirnas=mmu-<br/>miR-27a-<br/>3p&amp;threshold=0)</a> |
| Snn (mmu) ⓘ    | mmu-miR-27a-3p ⓘ |    | 0.934<br><a href="(/DianaTools/index.php?r=microT_CDS/results&amp;keywords=mmu-miR-27a-3p%20ENSMUSG00000037972&amp;genes=ENSMUSG00000037972&amp;mirnas=mmu-miR-27a-3p&amp;threshold=0)">(/DianaTools/index.php?<br/>r=microT_CDS/results&amp;keywords=mmu-<br/>miR-27a-<br/>3p%20ENSMUSG00000037972&amp;genes=ENSMUSG00000037972&amp;mirnas=mmu-<br/>miR-27a-<br/>3p&amp;threshold=0)</a> |
| Snn (mmu) ⓘ    | mmu-miR-27a-3p ⓘ |    | 0.934<br><a href="(/DianaTools/index.php?r=microT_CDS/results&amp;keywords=mmu-miR-27a-3p%20ENSMUSG00000037972&amp;genes=ENSMUSG00000037972&amp;mirnas=mmu-miR-27a-3p&amp;threshold=0)">(/DianaTools/index.php?<br/>r=microT_CDS/results&amp;keywords=mmu-<br/>miR-27a-<br/>3p%20ENSMUSG00000037972&amp;genes=ENSMUSG00000037972&amp;mirnas=mmu-<br/>miR-27a-<br/>3p&amp;threshold=0)</a> |
| Ppm1k (mmu) ⓘ  | mmu-miR-27a-3p ⓘ |    | 0.928<br><a href="(/DianaTools/index.php?r=microT_CDS/results&amp;keywords=mmu-miR-27a-3p%20ENSMUSG00000037826&amp;genes=ENSMUSG00000037826&amp;mirnas=mmu-miR-27a-3p&amp;threshold=0)">(/DianaTools/index.php?<br/>r=microT_CDS/results&amp;keywords=mmu-<br/>miR-27a-<br/>3p%20ENSMUSG00000037826&amp;genes=ENSMUSG00000037826&amp;mirnas=mmu-<br/>miR-27a-<br/>3p&amp;threshold=0)</a> |
| Cnot1 (mmu) ⓘ  | mmu-miR-27a-3p ⓘ |  | 0.906<br><a href="(/DianaTools/index.php?r=microT_CDS/results&amp;keywords=mmu-miR-27a-3p%20ENSMUSG00000036550&amp;genes=ENSMUSG00000036550&amp;mirnas=mmu-miR-27a-3p&amp;threshold=0)">(/DianaTools/index.php?<br/>r=microT_CDS/results&amp;keywords=mmu-<br/>miR-27a-<br/>3p%20ENSMUSG00000036550&amp;genes=ENSMUSG00000036550&amp;mirnas=mmu-<br/>miR-27a-<br/>3p&amp;threshold=0)</a> |
| Hook3 (mmu) ⓘ  | mmu-miR-27a-3p ⓘ |  | 0.886<br><a href="(/DianaTools/index.php?r=microT_CDS/results&amp;keywords=mmu-miR-27a-3p%20ENSMUSG00000037234&amp;genes=ENSMUSG00000037234&amp;mirnas=mmu-miR-27a-3p&amp;threshold=0)">(/DianaTools/index.php?<br/>r=microT_CDS/results&amp;keywords=mmu-<br/>miR-27a-<br/>3p%20ENSMUSG00000037234&amp;genes=ENSMUSG00000037234&amp;mirnas=mmu-<br/>miR-27a-<br/>3p&amp;threshold=0)</a> |
| Rara (mmu) ⓘ   | mmu-miR-27a-3p ⓘ |  | 0.856<br><a href="(/DianaTools/index.php?r=microT_CDS/results&amp;keywords=mmu-miR-27a-3p%20ENSMUSG00000037992&amp;genes=ENSMUSG00000037992&amp;mirnas=mmu-miR-27a-3p&amp;threshold=0)">(/DianaTools/index.php?<br/>r=microT_CDS/results&amp;keywords=mmu-<br/>miR-27a-<br/>3p%20ENSMUSG00000037992&amp;genes=ENSMUSG00000037992&amp;mirnas=mmu-<br/>miR-27a-<br/>3p&amp;threshold=0)</a> |
| Fam13a (mmu) ⓘ | mmu-miR-27a-3p ⓘ |  | 0.797<br><a href="(/DianaTools/index.php?r=microT_CDS/results&amp;keywords=mmu-miR-27a-3p%20ENSMUSG00000037709&amp;genes=ENSMUSG00000037709&amp;mirnas=mmu-miR-27a-3p&amp;threshold=0)">(/DianaTools/index.php?<br/>r=microT_CDS/results&amp;keywords=mmu-<br/>miR-27a-<br/>3p%20ENSMUSG00000037709&amp;genes=ENSMUSG00000037709&amp;mirnas=mmu-<br/>miR-27a-<br/>3p&amp;threshold=0)</a> |

We have placed cookies on your device to help make this website and the services we offer better. By using this site, you agree to the use of cookies. [Learn more](#) ([\(/DianaTools/index.php?r=site/terms\)]((/DianaTools/index.php?r=site/terms)))

I accept

|                    |                  |                                                                                      |                                                                                                                                                                                                                                                                                                                                                                                  |
|--------------------|------------------|--------------------------------------------------------------------------------------|----------------------------------------------------------------------------------------------------------------------------------------------------------------------------------------------------------------------------------------------------------------------------------------------------------------------------------------------------------------------------------|
| Dner (mmu) ⓘ       | mmu-miR-27a-3p ⓘ |    | <a href="#">0.783</a><br><a href="(/DianaTools/index.php?r=microT_CDS/results&amp;keywords=mmu-miR-27a-3p%20ENSMUSG00000036766&amp;genes=ENSMUSG00000036766&amp;mirnas=mmu-miR-27a-3p&amp;threshold=0)">(/DianaTools/index.php?r=microT_CDS/results&amp;keywords=mmu-miR-27a-3p%20ENSMUSG00000036766&amp;genes=ENSMUSG00000036766&amp;mirnas=mmu-miR-27a-3p&amp;threshold=0)</a> |
| Fam76b (mmu) ⓘ     | mmu-miR-27a-3p ⓘ |    | <a href="#">0.782</a><br><a href="(/DianaTools/index.php?r=microT_CDS/results&amp;keywords=mmu-miR-27a-3p%20ENSMUSG00000037808&amp;genes=ENSMUSG00000037808&amp;mirnas=mmu-miR-27a-3p&amp;threshold=0)">(/DianaTools/index.php?r=microT_CDS/results&amp;keywords=mmu-miR-27a-3p%20ENSMUSG00000037808&amp;genes=ENSMUSG00000037808&amp;mirnas=mmu-miR-27a-3p&amp;threshold=0)</a> |
| D15Ert621e (mmu) ⓘ | mmu-miR-27a-3p ⓘ |    | <a href="#">0.768</a><br><a href="(/DianaTools/index.php?r=microT_CDS/results&amp;keywords=mmu-miR-27a-3p%20ENSMUSG00000037119&amp;genes=ENSMUSG00000037119&amp;mirnas=mmu-miR-27a-3p&amp;threshold=0)">(/DianaTools/index.php?r=microT_CDS/results&amp;keywords=mmu-miR-27a-3p%20ENSMUSG00000037119&amp;genes=ENSMUSG00000037119&amp;mirnas=mmu-miR-27a-3p&amp;threshold=0)</a> |
| Rap2b (mmu) ⓘ      | mmu-miR-27a-3p ⓘ |    | <a href="#">0.731</a><br><a href="(/DianaTools/index.php?r=microT_CDS/results&amp;keywords=mmu-miR-27a-3p%20ENSMUSG00000036894&amp;genes=ENSMUSG00000036894&amp;mirnas=mmu-miR-27a-3p&amp;threshold=0)">(/DianaTools/index.php?r=microT_CDS/results&amp;keywords=mmu-miR-27a-3p%20ENSMUSG00000036894&amp;genes=ENSMUSG00000036894&amp;mirnas=mmu-miR-27a-3p&amp;threshold=0)</a> |
| Stk35 (mmu) ⓘ      | mmu-miR-27a-3p ⓘ |    | <a href="#">0.717</a><br><a href="(/DianaTools/index.php?r=microT_CDS/results&amp;keywords=mmu-miR-27a-3p%20ENSMUSG00000037885&amp;genes=ENSMUSG00000037885&amp;mirnas=mmu-miR-27a-3p&amp;threshold=0)">(/DianaTools/index.php?r=microT_CDS/results&amp;keywords=mmu-miR-27a-3p%20ENSMUSG00000037885&amp;genes=ENSMUSG00000037885&amp;mirnas=mmu-miR-27a-3p&amp;threshold=0)</a> |
| Rfxap (mmu) ⓘ      | mmu-miR-27a-3p ⓘ |    | <a href="#">0.711</a><br><a href="(/DianaTools/index.php?r=microT_CDS/results&amp;keywords=mmu-miR-27a-3p%20ENSMUSG00000036615&amp;genes=ENSMUSG00000036615&amp;mirnas=mmu-miR-27a-3p&amp;threshold=0)">(/DianaTools/index.php?r=microT_CDS/results&amp;keywords=mmu-miR-27a-3p%20ENSMUSG00000036615&amp;genes=ENSMUSG00000036615&amp;mirnas=mmu-miR-27a-3p&amp;threshold=0)</a> |
| Bri3bp (mmu) ⓘ     | mmu-miR-27a-3p ⓘ |    | <a href="#">0.687</a><br><a href="(/DianaTools/index.php?r=microT_CDS/results&amp;keywords=mmu-miR-27a-3p%20ENSMUSG00000037905&amp;genes=ENSMUSG00000037905&amp;mirnas=mmu-miR-27a-3p&amp;threshold=0)">(/DianaTools/index.php?r=microT_CDS/results&amp;keywords=mmu-miR-27a-3p%20ENSMUSG00000037905&amp;genes=ENSMUSG00000037905&amp;mirnas=mmu-miR-27a-3p&amp;threshold=0)</a> |
| Ss18 (mmu) ⓘ       | mmu-miR-27a-3p ⓘ |  | <a href="#">0.682</a><br><a href="(/DianaTools/index.php?r=microT_CDS/results&amp;keywords=mmu-miR-27a-3p%20ENSMUSG00000037013&amp;genes=ENSMUSG00000037013&amp;mirnas=mmu-miR-27a-3p&amp;threshold=0)">(/DianaTools/index.php?r=microT_CDS/results&amp;keywords=mmu-miR-27a-3p%20ENSMUSG00000037013&amp;genes=ENSMUSG00000037013&amp;mirnas=mmu-miR-27a-3p&amp;threshold=0)</a> |
| Nufip2 (mmu) ⓘ     | mmu-miR-27a-3p ⓘ |  | <a href="#">0.640</a><br><a href="(/DianaTools/index.php?r=microT_CDS/results&amp;keywords=mmu-miR-27a-3p%20ENSMUSG00000037857&amp;genes=ENSMUSG00000037857&amp;mirnas=mmu-miR-27a-3p&amp;threshold=0)">(/DianaTools/index.php?r=microT_CDS/results&amp;keywords=mmu-miR-27a-3p%20ENSMUSG00000037857&amp;genes=ENSMUSG00000037857&amp;mirnas=mmu-miR-27a-3p&amp;threshold=0)</a> |
| Nufip2 (mmu) ⓘ     | mmu-miR-27a-3p ⓘ |  | <a href="#">0.640</a><br><a href="(/DianaTools/index.php?r=microT_CDS/results&amp;keywords=mmu-miR-27a-3p%20ENSMUSG00000037857&amp;genes=ENSMUSG00000037857&amp;mirnas=mmu-miR-27a-3p&amp;threshold=0)">(/DianaTools/index.php?r=microT_CDS/results&amp;keywords=mmu-miR-27a-3p%20ENSMUSG00000037857&amp;genes=ENSMUSG00000037857&amp;mirnas=mmu-miR-27a-3p&amp;threshold=0)</a> |
| Rcor1 (mmu) ⓘ      | mmu-miR-27a-3p ⓘ |  | <a href="#">0.639</a><br><a href="(/DianaTools/index.php?r=microT_CDS/results&amp;keywords=mmu-miR-27a-3p%20ENSMUSG00000037896&amp;genes=ENSMUSG00000037896&amp;mirnas=mmu-miR-27a-3p&amp;threshold=0)">(/DianaTools/index.php?r=microT_CDS/results&amp;keywords=mmu-miR-27a-3p%20ENSMUSG00000037896&amp;genes=ENSMUSG00000037896&amp;mirnas=mmu-miR-27a-3p&amp;threshold=0)</a> |

We have placed cookies on your device to help make this website and the services we offer better. By using this site, you agree to the use of cookies. [Learn more](#) ([\(/DianaTools/index.php?r=site/terms\)]((/DianaTools/index.php?r=site/terms))).

I accept

|                 |                  |                                                                                      |                                                                                                                                                                                                                                                                                                                                                                                           |
|-----------------|------------------|--------------------------------------------------------------------------------------|-------------------------------------------------------------------------------------------------------------------------------------------------------------------------------------------------------------------------------------------------------------------------------------------------------------------------------------------------------------------------------------------|
| Crp (mmu) ⓘ     | mmu-miR-27a-3p ⓘ |    | 0.599<br><a href="(/DianaTools/index.php?r=microT_CDS/results&amp;keywords=mmu-miR-27a-3p%20ENSMUSG00000037942&amp;genes=ENSMUSG00000037942&amp;mirnas=mmu-miR-27a-3p&amp;threshold=0)">(/DianaTools/index.php?<br/>r=microT_CDS/results&amp;keywords=mmu-<br/>miR-27a-<br/>3p%20ENSMUSG00000037942&amp;genes=ENSMUSG00000037942&amp;mirnas=mmu-<br/>miR-27a-<br/>3p&amp;threshold=0)</a> |
| Ttyh3 (mmu) ⓘ   | mmu-miR-27a-3p ⓘ |    | 0.595<br><a href="(/DianaTools/index.php?r=microT_CDS/results&amp;keywords=mmu-miR-27a-3p%20ENSMUSG00000036565&amp;genes=ENSMUSG00000036565&amp;mirnas=mmu-miR-27a-3p&amp;threshold=0)">(/DianaTools/index.php?<br/>r=microT_CDS/results&amp;keywords=mmu-<br/>miR-27a-<br/>3p%20ENSMUSG00000036565&amp;genes=ENSMUSG00000036565&amp;mirnas=mmu-<br/>miR-27a-<br/>3p&amp;threshold=0)</a> |
| Otud4 (mmu) ⓘ   | mmu-miR-27a-3p ⓘ |    | 0.579<br><a href="(/DianaTools/index.php?r=microT_CDS/results&amp;keywords=mmu-miR-27a-3p%20ENSMUSG00000036990&amp;genes=ENSMUSG00000036990&amp;mirnas=mmu-miR-27a-3p&amp;threshold=0)">(/DianaTools/index.php?<br/>r=microT_CDS/results&amp;keywords=mmu-<br/>miR-27a-<br/>3p%20ENSMUSG00000036990&amp;genes=ENSMUSG00000036990&amp;mirnas=mmu-<br/>miR-27a-<br/>3p&amp;threshold=0)</a> |
| Mex3c (mmu) ⓘ   | mmu-miR-27a-3p ⓘ |    | 0.577<br><a href="(/DianaTools/index.php?r=microT_CDS/results&amp;keywords=mmu-miR-27a-3p%20ENSMUSG00000037253&amp;genes=ENSMUSG00000037253&amp;mirnas=mmu-miR-27a-3p&amp;threshold=0)">(/DianaTools/index.php?<br/>r=microT_CDS/results&amp;keywords=mmu-<br/>miR-27a-<br/>3p%20ENSMUSG00000037253&amp;genes=ENSMUSG00000037253&amp;mirnas=mmu-<br/>miR-27a-<br/>3p&amp;threshold=0)</a> |
| Fam168b (mmu) ⓘ | mmu-miR-27a-3p ⓘ |    | 0.568<br><a href="(/DianaTools/index.php?r=microT_CDS/results&amp;keywords=mmu-miR-27a-3p%20ENSMUSG00000037503&amp;genes=ENSMUSG00000037503&amp;mirnas=mmu-miR-27a-3p&amp;threshold=0)">(/DianaTools/index.php?<br/>r=microT_CDS/results&amp;keywords=mmu-<br/>miR-27a-<br/>3p%20ENSMUSG00000037503&amp;genes=ENSMUSG00000037503&amp;mirnas=mmu-<br/>miR-27a-<br/>3p&amp;threshold=0)</a> |
| Wnt4 (mmu) ⓘ    | mmu-miR-27a-3p ⓘ |    | 0.563<br><a href="(/DianaTools/index.php?r=microT_CDS/results&amp;keywords=mmu-miR-27a-3p%20ENSMUSG00000036856&amp;genes=ENSMUSG00000036856&amp;mirnas=mmu-miR-27a-3p&amp;threshold=0)">(/DianaTools/index.php?<br/>r=microT_CDS/results&amp;keywords=mmu-<br/>miR-27a-<br/>3p%20ENSMUSG00000036856&amp;genes=ENSMUSG00000036856&amp;mirnas=mmu-<br/>miR-27a-<br/>3p&amp;threshold=0)</a> |
| Larp1 (mmu) ⓘ   | mmu-miR-27a-3p ⓘ |   | 0.538<br><a href="(/DianaTools/index.php?r=microT_CDS/results&amp;keywords=mmu-miR-27a-3p%20ENSMUSG00000037331&amp;genes=ENSMUSG00000037331&amp;mirnas=mmu-miR-27a-3p&amp;threshold=0)">(/DianaTools/index.php?<br/>r=microT_CDS/results&amp;keywords=mmu-<br/>miR-27a-<br/>3p%20ENSMUSG00000037331&amp;genes=ENSMUSG00000037331&amp;mirnas=mmu-<br/>miR-27a-<br/>3p&amp;threshold=0)</a> |
| Larp1 (mmu) ⓘ   | mmu-miR-27a-3p ⓘ |  | 0.538<br><a href="(/DianaTools/index.php?r=microT_CDS/results&amp;keywords=mmu-miR-27a-3p%20ENSMUSG00000037331&amp;genes=ENSMUSG00000037331&amp;mirnas=mmu-miR-27a-3p&amp;threshold=0)">(/DianaTools/index.php?<br/>r=microT_CDS/results&amp;keywords=mmu-<br/>miR-27a-<br/>3p%20ENSMUSG00000037331&amp;genes=ENSMUSG00000037331&amp;mirnas=mmu-<br/>miR-27a-<br/>3p&amp;threshold=0)</a> |
| Socs5 (mmu) ⓘ   | mmu-miR-27a-3p ⓘ |  | 0.519<br><a href="(/DianaTools/index.php?r=microT_CDS/results&amp;keywords=mmu-miR-27a-3p%20ENSMUSG00000037104&amp;genes=ENSMUSG00000037104&amp;mirnas=mmu-miR-27a-3p&amp;threshold=0)">(/DianaTools/index.php?<br/>r=microT_CDS/results&amp;keywords=mmu-<br/>miR-27a-<br/>3p%20ENSMUSG00000037104&amp;genes=ENSMUSG00000037104&amp;mirnas=mmu-<br/>miR-27a-<br/>3p&amp;threshold=0)</a> |
| Socs5 (mmu) ⓘ   | mmu-miR-27a-3p ⓘ |  | 0.519<br><a href="(/DianaTools/index.php?r=microT_CDS/results&amp;keywords=mmu-miR-27a-3p%20ENSMUSG00000037104&amp;genes=ENSMUSG00000037104&amp;mirnas=mmu-miR-27a-3p&amp;threshold=0)">(/DianaTools/index.php?<br/>r=microT_CDS/results&amp;keywords=mmu-<br/>miR-27a-<br/>3p%20ENSMUSG00000037104&amp;genes=ENSMUSG00000037104&amp;mirnas=mmu-<br/>miR-27a-<br/>3p&amp;threshold=0)</a> |
| Tob1 (mmu) ⓘ    | mmu-miR-27a-3p ⓘ |  | 0.519<br><a href="(/DianaTools/index.php?r=microT_CDS/results&amp;keywords=mmu-miR-27a-3p%20ENSMUSG00000037573&amp;genes=ENSMUSG00000037573&amp;mirnas=mmu-miR-27a-3p&amp;threshold=0)">(/DianaTools/index.php?<br/>r=microT_CDS/results&amp;keywords=mmu-<br/>miR-27a-<br/>3p%20ENSMUSG00000037573&amp;genes=ENSMUSG00000037573&amp;mirnas=mmu-<br/>miR-27a-<br/>3p&amp;threshold=0)</a> |

We have placed cookies on your device to help make this website and the services we offer better. By using this site, you agree to the use of cookies. [Learn more]((/DianaTools/index.php?r=site/terms)) ([/DianaTools/index.php?r=site/terms]((/DianaTools/index.php?r=site/terms))).

I accept

|                       |                  |                                                                                      |                                                                                                                                                                                                               |
|-----------------------|------------------|--------------------------------------------------------------------------------------|---------------------------------------------------------------------------------------------------------------------------------------------------------------------------------------------------------------|
| Rapgef6 (mmu) ⓘ       | mmu-miR-27a-3p ⓘ |    | <a href="#">0.516</a><br><a href="#">(/DianaTools/index.php?r=microT_CDS/results&amp;keywords=mmu-miR-27a-3p%20ENSMUSG00000037533&amp;genes=ENSMUSG00000037533&amp;mirnas=mmu-miR-27a-3p&amp;threshold=0)</a> |
| Mynn (mmu) ⓘ          | mmu-miR-27a-3p ⓘ |    | <a href="#">0.513</a><br><a href="#">(/DianaTools/index.php?r=microT_CDS/results&amp;keywords=mmu-miR-27a-3p%20ENSMUSG00000037730&amp;genes=ENSMUSG00000037730&amp;mirnas=mmu-miR-27a-3p&amp;threshold=0)</a> |
| Dusp8 (mmu) ⓘ         | mmu-miR-27a-3p ⓘ |    | <a href="#">0.511</a><br><a href="#">(/DianaTools/index.php?r=microT_CDS/results&amp;keywords=mmu-miR-27a-3p%20ENSMUSG00000037887&amp;genes=ENSMUSG00000037887&amp;mirnas=mmu-miR-27a-3p&amp;threshold=0)</a> |
| E330009J07Rik (mmu) ⓘ | mmu-miR-27a-3p ⓘ |    | <a href="#">0.501</a><br><a href="#">(/DianaTools/index.php?r=microT_CDS/results&amp;keywords=mmu-miR-27a-3p%20ENSMUSG00000037172&amp;genes=ENSMUSG00000037172&amp;mirnas=mmu-miR-27a-3p&amp;threshold=0)</a> |
| Cyld (mmu) ⓘ          | mmu-miR-27a-3p ⓘ |    | <a href="#">0.498</a><br><a href="#">(/DianaTools/index.php?r=microT_CDS/results&amp;keywords=mmu-miR-27a-3p%20ENSMUSG00000036712&amp;genes=ENSMUSG00000036712&amp;mirnas=mmu-miR-27a-3p&amp;threshold=0)</a> |
| Pomk (mmu) ⓘ          | mmu-miR-27a-3p ⓘ |    | <a href="#">0.469</a><br><a href="#">(/DianaTools/index.php?r=microT_CDS/results&amp;keywords=mmu-miR-27a-3p%20ENSMUSG00000037251&amp;genes=ENSMUSG00000037251&amp;mirnas=mmu-miR-27a-3p&amp;threshold=0)</a> |
| Man1b1 (mmu) ⓘ        | mmu-miR-27a-3p ⓘ |    | <a href="#">0.462</a><br><a href="#">(/DianaTools/index.php?r=microT_CDS/results&amp;keywords=mmu-miR-27a-3p%20ENSMUSG00000036646&amp;genes=ENSMUSG00000036646&amp;mirnas=mmu-miR-27a-3p&amp;threshold=0)</a> |
| Matr3 (mmu) ⓘ         | mmu-miR-27a-3p ⓘ |  | <a href="#">0.461</a><br><a href="#">(/DianaTools/index.php?r=microT_CDS/results&amp;keywords=mmu-miR-27a-3p%20ENSMUSG00000037236&amp;genes=ENSMUSG00000037236&amp;mirnas=mmu-miR-27a-3p&amp;threshold=0)</a> |
| Slc30a1 (mmu) ⓘ       | mmu-miR-27a-3p ⓘ |  | <a href="#">0.455</a><br><a href="#">(/DianaTools/index.php?r=microT_CDS/results&amp;keywords=mmu-miR-27a-3p%20ENSMUSG00000037434&amp;genes=ENSMUSG00000037434&amp;mirnas=mmu-miR-27a-3p&amp;threshold=0)</a> |
| Trim3 (mmu) ⓘ         | mmu-miR-27a-3p ⓘ |  | <a href="#">0.455</a><br><a href="#">(/DianaTools/index.php?r=microT_CDS/results&amp;keywords=mmu-miR-27a-3p%20ENSMUSG00000036989&amp;genes=ENSMUSG00000036989&amp;mirnas=mmu-miR-27a-3p&amp;threshold=0)</a> |
| Spg20 (mmu) ⓘ         | mmu-miR-27a-3p ⓘ |  | -                                                                                                                                                                                                             |
| Galnt6 (mmu) ⓘ        | mmu-miR-27a-3p ⓘ |  | -                                                                                                                                                                                                             |
| Fam222b (mmu) ⓘ       | mmu-miR-27a-3p ⓘ |  | -                                                                                                                                                                                                             |

We have placed cookies on your device to help make this website and the services we offer better. By using this site, you agree to the use of cookies. [Learn more](#) ([/DianaTools/index.php?r=site/terms](#)).

I accept

|                       |                  |    |   |
|-----------------------|------------------|----|---|
| Iars (mmu) ⓘ          | mmu-miR-27a-3p ⓘ | IP | - |
| Man1c1 (mmu) ⓘ        | mmu-miR-27a-3p ⓘ | IP | - |
| Klh13 (mmu) ⓘ         | mmu-miR-27a-3p ⓘ | IP | - |
| Inpp4b (mmu) ⓘ        | mmu-miR-27a-3p ⓘ | IP | - |
| Phc3 (mmu) ⓘ          | mmu-miR-27a-3p ⓘ | IP | - |
| 2410004B18Rik (mmu) ⓘ | mmu-miR-27a-3p ⓘ | IP | - |
| 3110057O12Rik (mmu) ⓘ | mmu-miR-27a-3p ⓘ | IP | - |
| 2510003E04Rik (mmu) ⓘ | mmu-miR-27a-3p ⓘ | IP | - |
| Jmjd1c (mmu) ⓘ        | mmu-miR-27a-3p ⓘ | IP | - |
| Stk35 (mmu) ⓘ         | mmu-miR-27a-3p ⓘ | IP | - |
| Fbxo34 (mmu) ⓘ        | mmu-miR-27a-3p ⓘ | IP | - |
| Stag1 (mmu) ⓘ         | mmu-miR-27a-3p ⓘ | IP | - |
| Zbtb42 (mmu) ⓘ        | mmu-miR-27a-3p ⓘ | IP | - |
| Atp11b (mmu) ⓘ        | mmu-miR-27a-3p ⓘ | IP | - |
| Lrg1 (mmu) ⓘ          | mmu-miR-27a-3p ⓘ | IP | - |
| Cep85 (mmu) ⓘ         | mmu-miR-27a-3p ⓘ | IP | - |
| Ehmt1 (mmu) ⓘ         | mmu-miR-27a-3p ⓘ | IP | - |
| Ddx1 (mmu) ⓘ          | mmu-miR-27a-3p ⓘ | IP | - |
| Ddx1 (mmu) ⓘ          | mmu-miR-27a-3p ⓘ | IP | - |
| Scd1 (mmu) ⓘ          | mmu-miR-27a-3p ⓘ | IP | - |
| Aagab (mmu) ⓘ         | mmu-miR-27a-3p ⓘ | IP | - |
| Cd81 (mmu) ⓘ          | mmu-miR-27a-3p ⓘ | IP | - |
| Cd81 (mmu) ⓘ          | mmu-miR-27a-3p ⓘ | IP | - |
| Vps13b (mmu) ⓘ        | mmu-miR-27a-3p ⓘ | IP | - |
| Cpe (mmu) ⓘ           | mmu-miR-27a-3p ⓘ | IP | - |
| Tbcel (mmu) ⓘ         | mmu-miR-27a-3p ⓘ | IP | - |
| Setd7 (mmu) ⓘ         | mmu-miR-27a-3p ⓘ | IP | - |
| Setd7 (mmu) ⓘ         | mmu-miR-27a-3p ⓘ | IP | - |
| Slc24a2 (mmu) ⓘ       | mmu-miR-27a-3p ⓘ | IP | - |
| Fam76b (mmu) ⓘ        | mmu-miR-27a-3p ⓘ | IP | - |
| Paip2 (mmu) ⓘ         | mmu-miR-27a-3p ⓘ | IP | - |
| Fam135b (mmu) ⓘ       | mmu-miR-27a-3p ⓘ | IP | - |

We have placed cookies on your device to help make this website and the services we offer better. By using this site, you agree to the use of cookies. [Learn more \(/DianaTools/index.php?r=site/terms\)](#).

I accept

|                       |                  |    |                                                                                                                                                                                  |
|-----------------------|------------------|----|----------------------------------------------------------------------------------------------------------------------------------------------------------------------------------|
| Acaa2 (mmu) ⓘ         | mmu-miR-27a-3p ⓘ | IP | -                                                                                                                                                                                |
| Jmjd1c (mmu) ⓘ        | mmu-miR-27a-3p ⓘ | IP | -                                                                                                                                                                                |
| Mbd5 (mmu) ⓘ          | mmu-miR-27a-3p ⓘ | IP | -                                                                                                                                                                                |
| Lzts3 (mmu) ⓘ         | mmu-miR-27a-3p ⓘ | IP | -                                                                                                                                                                                |
| Fermt2 (mmu) ⓘ        | mmu-miR-27a-3p ⓘ | IP | -                                                                                                                                                                                |
| Tspan14 (mmu) ⓘ       | mmu-miR-27a-3p ⓘ | IP | -                                                                                                                                                                                |
| Nov (mmu) ⓘ           | mmu-miR-27a-3p ⓘ | IP | -                                                                                                                                                                                |
| Syn1 (mmu) ⓘ          | mmu-miR-27a-3p ⓘ | IP | -                                                                                                                                                                                |
| Tmem33 (mmu) ⓘ        | mmu-miR-27a-3p ⓘ | IP | -                                                                                                                                                                                |
| Arap2 (mmu) ⓘ         | mmu-miR-27a-3p ⓘ | IP | -                                                                                                                                                                                |
| Pnpla7 (mmu) ⓘ        | mmu-miR-27a-3p ⓘ | IP | -                                                                                                                                                                                |
| Ahdc1 (mmu) ⓘ         | mmu-miR-27a-3p ⓘ | IP | -                                                                                                                                                                                |
| Ints7 (mmu) ⓘ         | mmu-miR-27a-3p ⓘ | IP | -                                                                                                                                                                                |
| Ints7 (mmu) ⓘ         | mmu-miR-27a-3p ⓘ | IP | -                                                                                                                                                                                |
| 4932438A13Rik (mmu) ⓘ | mmu-miR-27a-3p ⓘ | IP | -                                                                                                                                                                                |
| 4932438A13Rik (mmu) ⓘ | mmu-miR-27a-3p ⓘ | IP | -                                                                                                                                                                                |
| Topors (mmu) ⓘ        | mmu-miR-27a-3p ⓘ | IP | -                                                                                                                                                                                |
| Sh3rf3 (mmu) ⓘ        | mmu-miR-27a-3p ⓘ | IP | -                                                                                                                                                                                |
| Zfp365 (mmu) ⓘ        | mmu-miR-27a-3p ⓘ | IP | -                                                                                                                                                                                |
| Wdr19 (mmu) ⓘ         | mmu-miR-27a-3p ⓘ | IP | -                                                                                                                                                                                |
| Sema7a (mmu) ⓘ        | mmu-miR-27a-3p ⓘ | IP | 1.000<br>(/DianaTools/index.php?<br>r=miroT_CDS/results&keywords=mmu-<br>miR-27a-<br>3p%20ENSMUSG00000038264&genes=ENSMUSG00000038264&mirnas=mmu-<br>miR-27a-<br>3p&threshold=0) |
| Sema7a (mmu) ⓘ        | mmu-miR-27a-3p ⓘ | IP | 1.000<br>(/DianaTools/index.php?<br>r=miroT_CDS/results&keywords=mmu-<br>miR-27a-<br>3p%20ENSMUSG00000038264&genes=ENSMUSG00000038264&mirnas=mmu-<br>miR-27a-<br>3p&threshold=0) |
| Gcc2 (mmu) ⓘ          | mmu-miR-27a-3p ⓘ | IP | 1.000<br>(/DianaTools/index.php?<br>r=miroT_CDS/results&keywords=mmu-<br>miR-27a-<br>3p%20ENSMUSG00000038039&genes=ENSMUSG00000038039&mirnas=mmu-<br>miR-27a-<br>3p&threshold=0) |
| Lonrf1 (mmu) ⓘ        | mmu-miR-27a-3p ⓘ | IP | 0.999<br>(/DianaTools/index.php?<br>r=miroT_CDS/results&keywords=mmu-<br>miR-27a-<br>3p%20ENSMUSG00000039633&genes=ENSMUSG00000039633&mirnas=mmu-<br>miR-27a-<br>3p&threshold=0) |

We have placed cookies on your device to help make this website and the services we offer better. By using this site, you agree to the use of cookies. [Learn more](#) (/DianaTools/index.php?r=site/terms)

I accept

|                 |                  |                                                                                      |                                                                                                                                                                                                                                                                                                                                                                  |
|-----------------|------------------|--------------------------------------------------------------------------------------|------------------------------------------------------------------------------------------------------------------------------------------------------------------------------------------------------------------------------------------------------------------------------------------------------------------------------------------------------------------|
| Rreb1 (mmu) ⓘ   | mmu-miR-27a-3p ⓘ |    | 0.996<br><a href="(/DianaTools/index.php?r=microT_CDS/results&amp;keywords=mmu-miR-27a-3p%20ENSMUSG00000039087&amp;genes=ENSMUSG00000039087&amp;mirnas=mmu-miR-27a-3p&amp;threshold=0)">(/DianaTools/index.php?r=microT_CDS/results&amp;keywords=mmu-miR-27a-3p%20ENSMUSG00000039087&amp;genes=ENSMUSG00000039087&amp;mirnas=mmu-miR-27a-3p&amp;threshold=0)</a> |
| En2 (mmu) ⓘ     | mmu-miR-27a-3p ⓘ |    | 0.994<br><a href="(/DianaTools/index.php?r=microT_CDS/results&amp;keywords=mmu-miR-27a-3p%20ENSMUSG00000039095&amp;genes=ENSMUSG00000039095&amp;mirnas=mmu-miR-27a-3p&amp;threshold=0)">(/DianaTools/index.php?r=microT_CDS/results&amp;keywords=mmu-miR-27a-3p%20ENSMUSG00000039095&amp;genes=ENSMUSG00000039095&amp;mirnas=mmu-miR-27a-3p&amp;threshold=0)</a> |
| Fam102a (mmu) ⓘ | mmu-miR-27a-3p ⓘ |    | 0.994<br><a href="(/DianaTools/index.php?r=microT_CDS/results&amp;keywords=mmu-miR-27a-3p%20ENSMUSG00000039157&amp;genes=ENSMUSG00000039157&amp;mirnas=mmu-miR-27a-3p&amp;threshold=0)">(/DianaTools/index.php?r=microT_CDS/results&amp;keywords=mmu-miR-27a-3p%20ENSMUSG00000039157&amp;genes=ENSMUSG00000039157&amp;mirnas=mmu-miR-27a-3p&amp;threshold=0)</a> |
| Fam126b (mmu) ⓘ | mmu-miR-27a-3p ⓘ |    | 0.991<br><a href="(/DianaTools/index.php?r=microT_CDS/results&amp;keywords=mmu-miR-27a-3p%20ENSMUSG00000038174&amp;genes=ENSMUSG00000038174&amp;mirnas=mmu-miR-27a-3p&amp;threshold=0)">(/DianaTools/index.php?r=microT_CDS/results&amp;keywords=mmu-miR-27a-3p%20ENSMUSG00000038174&amp;genes=ENSMUSG00000038174&amp;mirnas=mmu-miR-27a-3p&amp;threshold=0)</a> |
| Kmt2c (mmu) ⓘ   | mmu-miR-27a-3p ⓘ |    | 0.991<br><a href="(/DianaTools/index.php?r=microT_CDS/results&amp;keywords=mmu-miR-27a-3p%20ENSMUSG00000038056&amp;genes=ENSMUSG00000038056&amp;mirnas=mmu-miR-27a-3p&amp;threshold=0)">(/DianaTools/index.php?r=microT_CDS/results&amp;keywords=mmu-miR-27a-3p%20ENSMUSG00000038056&amp;genes=ENSMUSG00000038056&amp;mirnas=mmu-miR-27a-3p&amp;threshold=0)</a> |
| Abhd17c (mmu) ⓘ | mmu-miR-27a-3p ⓘ |    | 0.958<br><a href="(/DianaTools/index.php?r=microT_CDS/results&amp;keywords=mmu-miR-27a-3p%20ENSMUSG00000038459&amp;genes=ENSMUSG00000038459&amp;mirnas=mmu-miR-27a-3p&amp;threshold=0)">(/DianaTools/index.php?r=microT_CDS/results&amp;keywords=mmu-miR-27a-3p%20ENSMUSG00000038459&amp;genes=ENSMUSG00000038459&amp;mirnas=mmu-miR-27a-3p&amp;threshold=0)</a> |
| Sv2a (mmu) ⓘ    | mmu-miR-27a-3p ⓘ |   | 0.956<br><a href="(/DianaTools/index.php?r=microT_CDS/results&amp;keywords=mmu-miR-27a-3p%20ENSMUSG00000038486&amp;genes=ENSMUSG00000038486&amp;mirnas=mmu-miR-27a-3p&amp;threshold=0)">(/DianaTools/index.php?r=microT_CDS/results&amp;keywords=mmu-miR-27a-3p%20ENSMUSG00000038486&amp;genes=ENSMUSG00000038486&amp;mirnas=mmu-miR-27a-3p&amp;threshold=0)</a> |
| Ss181l1 (mmu) ⓘ | mmu-miR-27a-3p ⓘ |  | 0.951<br><a href="(/DianaTools/index.php?r=microT_CDS/results&amp;keywords=mmu-miR-27a-3p%20ENSMUSG00000039086&amp;genes=ENSMUSG00000039086&amp;mirnas=mmu-miR-27a-3p&amp;threshold=0)">(/DianaTools/index.php?r=microT_CDS/results&amp;keywords=mmu-miR-27a-3p%20ENSMUSG00000039086&amp;genes=ENSMUSG00000039086&amp;mirnas=mmu-miR-27a-3p&amp;threshold=0)</a> |
| Wipf2 (mmu) ⓘ   | mmu-miR-27a-3p ⓘ |  | 0.933<br><a href="(/DianaTools/index.php?r=microT_CDS/results&amp;keywords=mmu-miR-27a-3p%20ENSMUSG00000038013&amp;genes=ENSMUSG00000038013&amp;mirnas=mmu-miR-27a-3p&amp;threshold=0)">(/DianaTools/index.php?r=microT_CDS/results&amp;keywords=mmu-miR-27a-3p%20ENSMUSG00000038013&amp;genes=ENSMUSG00000038013&amp;mirnas=mmu-miR-27a-3p&amp;threshold=0)</a> |
| March6 (mmu) ⓘ  | mmu-miR-27a-3p ⓘ |  | 0.928<br><a href="(/DianaTools/index.php?r=microT_CDS/results&amp;keywords=mmu-miR-27a-3p%20ENSMUSG00000039100&amp;genes=ENSMUSG00000039100&amp;mirnas=mmu-miR-27a-3p&amp;threshold=0)">(/DianaTools/index.php?r=microT_CDS/results&amp;keywords=mmu-miR-27a-3p%20ENSMUSG00000039100&amp;genes=ENSMUSG00000039100&amp;mirnas=mmu-miR-27a-3p&amp;threshold=0)</a> |
| March6 (mmu) ⓘ  | mmu-miR-27a-3p ⓘ |  | 0.928<br><a href="(/DianaTools/index.php?r=microT_CDS/results&amp;keywords=mmu-miR-27a-3p%20ENSMUSG00000039100&amp;genes=ENSMUSG00000039100&amp;mirnas=mmu-miR-27a-3p&amp;threshold=0)">(/DianaTools/index.php?r=microT_CDS/results&amp;keywords=mmu-miR-27a-3p%20ENSMUSG00000039100&amp;genes=ENSMUSG00000039100&amp;mirnas=mmu-miR-27a-3p&amp;threshold=0)</a> |

We have placed cookies on your device to help make this website and the services we offer better. By using this site, you agree to the use of cookies. [Learn more](#) ([\(/DianaTools/index.php?r=site/terms\)]((/DianaTools/index.php?r=site/terms)))

I accept

|                                                                                                                                                                                                                                                                                                                                                                  |                |                  |                                                                                      |
|------------------------------------------------------------------------------------------------------------------------------------------------------------------------------------------------------------------------------------------------------------------------------------------------------------------------------------------------------------------|----------------|------------------|--------------------------------------------------------------------------------------|
| 0.902<br><a href="(/DianaTools/index.php?r=microT_CDS/results&amp;keywords=mmu-miR-27a-3p%20ENSMUSG00000038084&amp;genes=ENSMUSG00000038084&amp;mirnas=mmu-miR-27a-3p&amp;threshold=0)">(/DianaTools/index.php?r=microT_CDS/results&amp;keywords=mmu-miR-27a-3p%20ENSMUSG00000038084&amp;genes=ENSMUSG00000038084&amp;mirnas=mmu-miR-27a-3p&amp;threshold=0)</a> | OPA1 (mmu) ⓘ   | mmu-miR-27a-3p ⓘ |    |
| 0.900<br><a href="(/DianaTools/index.php?r=microT_CDS/results&amp;keywords=mmu-miR-27a-3p%20ENSMUSG00000039156&amp;genes=ENSMUSG00000039156&amp;mirnas=mmu-miR-27a-3p&amp;threshold=0)">(/DianaTools/index.php?r=microT_CDS/results&amp;keywords=mmu-miR-27a-3p%20ENSMUSG00000039156&amp;genes=ENSMUSG00000039156&amp;mirnas=mmu-miR-27a-3p&amp;threshold=0)</a> | Stim2 (mmu) ⓘ  | mmu-miR-27a-3p ⓘ |    |
| 0.900<br><a href="(/DianaTools/index.php?r=microT_CDS/results&amp;keywords=mmu-miR-27a-3p%20ENSMUSG00000039156&amp;genes=ENSMUSG00000039156&amp;mirnas=mmu-miR-27a-3p&amp;threshold=0)">(/DianaTools/index.php?r=microT_CDS/results&amp;keywords=mmu-miR-27a-3p%20ENSMUSG00000039156&amp;genes=ENSMUSG00000039156&amp;mirnas=mmu-miR-27a-3p&amp;threshold=0)</a> | Stim2 (mmu) ⓘ  | mmu-miR-27a-3p ⓘ |    |
| 0.884<br><a href="(/DianaTools/index.php?r=microT_CDS/results&amp;keywords=mmu-miR-27a-3p%20ENSMUSG00000038605&amp;genes=ENSMUSG00000038605&amp;mirnas=mmu-miR-27a-3p&amp;threshold=0)">(/DianaTools/index.php?r=microT_CDS/results&amp;keywords=mmu-miR-27a-3p%20ENSMUSG00000038605&amp;genes=ENSMUSG00000038605&amp;mirnas=mmu-miR-27a-3p&amp;threshold=0)</a> | Samd10 (mmu) ⓘ | mmu-miR-27a-3p ⓘ |    |
| 0.839<br><a href="(/DianaTools/index.php?r=microT_CDS/results&amp;keywords=mmu-miR-27a-3p%20ENSMUSG00000038127&amp;genes=ENSMUSG00000038127&amp;mirnas=mmu-miR-27a-3p&amp;threshold=0)">(/DianaTools/index.php?r=microT_CDS/results&amp;keywords=mmu-miR-27a-3p%20ENSMUSG00000038127&amp;genes=ENSMUSG00000038127&amp;mirnas=mmu-miR-27a-3p&amp;threshold=0)</a> | Ccdc50 (mmu) ⓘ | mmu-miR-27a-3p ⓘ |    |
| 0.801<br><a href="(/DianaTools/index.php?r=microT_CDS/results&amp;keywords=mmu-miR-27a-3p%20ENSMUSG00000039253&amp;genes=ENSMUSG00000039253&amp;mirnas=mmu-miR-27a-3p&amp;threshold=0)">(/DianaTools/index.php?r=microT_CDS/results&amp;keywords=mmu-miR-27a-3p%20ENSMUSG00000039253&amp;genes=ENSMUSG00000039253&amp;mirnas=mmu-miR-27a-3p&amp;threshold=0)</a> | Fn3krp (mmu) ⓘ | mmu-miR-27a-3p ⓘ |    |
| 0.800<br><a href="(/DianaTools/index.php?r=microT_CDS/results&amp;keywords=mmu-miR-27a-3p%20ENSMUSG00000039068&amp;genes=ENSMUSG00000039068&amp;mirnas=mmu-miR-27a-3p&amp;threshold=0)">(/DianaTools/index.php?r=microT_CDS/results&amp;keywords=mmu-miR-27a-3p%20ENSMUSG00000039068&amp;genes=ENSMUSG00000039068&amp;mirnas=mmu-miR-27a-3p&amp;threshold=0)</a> | Zzz3 (mmu) ⓘ   | mmu-miR-27a-3p ⓘ |   |
| 0.764<br><a href="(/DianaTools/index.php?r=microT_CDS/results&amp;keywords=mmu-miR-27a-3p%20ENSMUSG00000038612&amp;genes=ENSMUSG00000038612&amp;mirnas=mmu-miR-27a-3p&amp;threshold=0)">(/DianaTools/index.php?r=microT_CDS/results&amp;keywords=mmu-miR-27a-3p%20ENSMUSG00000038612&amp;genes=ENSMUSG00000038612&amp;mirnas=mmu-miR-27a-3p&amp;threshold=0)</a> | Mcl1 (mmu) ⓘ   | mmu-miR-27a-3p ⓘ |  |
| 0.739<br><a href="(/DianaTools/index.php?r=microT_CDS/results&amp;keywords=mmu-miR-27a-3p%20ENSMUSG00000038518&amp;genes=ENSMUSG00000038518&amp;mirnas=mmu-miR-27a-3p&amp;threshold=0)">(/DianaTools/index.php?r=microT_CDS/results&amp;keywords=mmu-miR-27a-3p%20ENSMUSG00000038518&amp;genes=ENSMUSG00000038518&amp;mirnas=mmu-miR-27a-3p&amp;threshold=0)</a> | Jarid2 (mmu) ⓘ | mmu-miR-27a-3p ⓘ |  |
| 0.729<br><a href="(/DianaTools/index.php?r=microT_CDS/results&amp;keywords=mmu-miR-27a-3p%20ENSMUSG00000038172&amp;genes=ENSMUSG00000038172&amp;mirnas=mmu-miR-27a-3p&amp;threshold=0)">(/DianaTools/index.php?r=microT_CDS/results&amp;keywords=mmu-miR-27a-3p%20ENSMUSG00000038172&amp;genes=ENSMUSG00000038172&amp;mirnas=mmu-miR-27a-3p&amp;threshold=0)</a> | Ttc39b (mmu) ⓘ | mmu-miR-27a-3p ⓘ |  |
| 0.708<br><a href="(/DianaTools/index.php?r=microT_CDS/results&amp;keywords=mmu-miR-27a-3p%20ENSMUSG00000038784&amp;genes=ENSMUSG00000038784&amp;mirnas=mmu-miR-27a-3p&amp;threshold=0)">(/DianaTools/index.php?r=microT_CDS/results&amp;keywords=mmu-miR-27a-3p%20ENSMUSG00000038784&amp;genes=ENSMUSG00000038784&amp;mirnas=mmu-miR-27a-3p&amp;threshold=0)</a> | Cnot4 (mmu) ⓘ  | mmu-miR-27a-3p ⓘ |  |

We have placed cookies on your device to help make this website and the services we offer better. By using this site, you agree to the use of cookies. [Learn more]((/DianaTools/index.php?r=site/terms)) ([/DianaTools/index.php?r=site/terms]((/DianaTools/index.php?r=site/terms))).

I accept



|                |                  |                                                                                      |                                                                                                                                                                                                                                                                                                                                                                |
|----------------|------------------|--------------------------------------------------------------------------------------|----------------------------------------------------------------------------------------------------------------------------------------------------------------------------------------------------------------------------------------------------------------------------------------------------------------------------------------------------------------|
| Rbm8a (mmu) ⓘ  | mmu-miR-27a-3p ⓘ |    | 0.651<br><a href="(/DianaTools/index.php?r=miroT_CDS/results&amp;keywords=mmu-miR-27a-3p%20ENSMUSG00000038374&amp;genes=ENSMUSG00000038374&amp;mirnas=mmu-miR-27a-3p&amp;threshold=0)">(/DianaTools/index.php?r=miroT_CDS/results&amp;keywords=mmu-miR-27a-3p%20ENSMUSG00000038374&amp;genes=ENSMUSG00000038374&amp;mirnas=mmu-miR-27a-3p&amp;threshold=0)</a> |
| Txnip (mmu) ⓘ  | mmu-miR-27a-3p ⓘ |    | 0.635<br><a href="(/DianaTools/index.php?r=miroT_CDS/results&amp;keywords=mmu-miR-27a-3p%20ENSMUSG00000038393&amp;genes=ENSMUSG00000038393&amp;mirnas=mmu-miR-27a-3p&amp;threshold=0)">(/DianaTools/index.php?r=miroT_CDS/results&amp;keywords=mmu-miR-27a-3p%20ENSMUSG00000038393&amp;genes=ENSMUSG00000038393&amp;mirnas=mmu-miR-27a-3p&amp;threshold=0)</a> |
| Egr1 (mmu) ⓘ   | mmu-miR-27a-3p ⓘ |    | 0.607<br><a href="(/DianaTools/index.php?r=miroT_CDS/results&amp;keywords=mmu-miR-27a-3p%20ENSMUSG00000038418&amp;genes=ENSMUSG00000038418&amp;mirnas=mmu-miR-27a-3p&amp;threshold=0)">(/DianaTools/index.php?r=miroT_CDS/results&amp;keywords=mmu-miR-27a-3p%20ENSMUSG00000038418&amp;genes=ENSMUSG00000038418&amp;mirnas=mmu-miR-27a-3p&amp;threshold=0)</a> |
| Egr1 (mmu) ⓘ   | mmu-miR-27a-3p ⓘ |    | 0.607<br><a href="(/DianaTools/index.php?r=miroT_CDS/results&amp;keywords=mmu-miR-27a-3p%20ENSMUSG00000038418&amp;genes=ENSMUSG00000038418&amp;mirnas=mmu-miR-27a-3p&amp;threshold=0)">(/DianaTools/index.php?r=miroT_CDS/results&amp;keywords=mmu-miR-27a-3p%20ENSMUSG00000038418&amp;genes=ENSMUSG00000038418&amp;mirnas=mmu-miR-27a-3p&amp;threshold=0)</a> |
| Fsd2 (mmu) ⓘ   | mmu-miR-27a-3p ⓘ |    | 0.598<br><a href="(/DianaTools/index.php?r=miroT_CDS/results&amp;keywords=mmu-miR-27a-3p%20ENSMUSG00000038663&amp;genes=ENSMUSG00000038663&amp;mirnas=mmu-miR-27a-3p&amp;threshold=0)">(/DianaTools/index.php?r=miroT_CDS/results&amp;keywords=mmu-miR-27a-3p%20ENSMUSG00000038663&amp;genes=ENSMUSG00000038663&amp;mirnas=mmu-miR-27a-3p&amp;threshold=0)</a> |
| Cnst (mmu) ⓘ   | mmu-miR-27a-3p ⓘ |    | 0.593<br><a href="(/DianaTools/index.php?r=miroT_CDS/results&amp;keywords=mmu-miR-27a-3p%20ENSMUSG00000038949&amp;genes=ENSMUSG00000038949&amp;mirnas=mmu-miR-27a-3p&amp;threshold=0)">(/DianaTools/index.php?r=miroT_CDS/results&amp;keywords=mmu-miR-27a-3p%20ENSMUSG00000038949&amp;genes=ENSMUSG00000038949&amp;mirnas=mmu-miR-27a-3p&amp;threshold=0)</a> |
| Mturn (mmu) ⓘ  | mmu-miR-27a-3p ⓘ |    | 0.593<br><a href="(/DianaTools/index.php?r=miroT_CDS/results&amp;keywords=mmu-miR-27a-3p%20ENSMUSG00000038065&amp;genes=ENSMUSG00000038065&amp;mirnas=mmu-miR-27a-3p&amp;threshold=0)">(/DianaTools/index.php?r=miroT_CDS/results&amp;keywords=mmu-miR-27a-3p%20ENSMUSG00000038065&amp;genes=ENSMUSG00000038065&amp;mirnas=mmu-miR-27a-3p&amp;threshold=0)</a> |
| Fndc3b (mmu) ⓘ | mmu-miR-27a-3p ⓘ |  | 0.590<br><a href="(/DianaTools/index.php?r=miroT_CDS/results&amp;keywords=mmu-miR-27a-3p%20ENSMUSG00000039286&amp;genes=ENSMUSG00000039286&amp;mirnas=mmu-miR-27a-3p&amp;threshold=0)">(/DianaTools/index.php?r=miroT_CDS/results&amp;keywords=mmu-miR-27a-3p%20ENSMUSG00000039286&amp;genes=ENSMUSG00000039286&amp;mirnas=mmu-miR-27a-3p&amp;threshold=0)</a> |
| Fndc3b (mmu) ⓘ | mmu-miR-27a-3p ⓘ |  | 0.590<br><a href="(/DianaTools/index.php?r=miroT_CDS/results&amp;keywords=mmu-miR-27a-3p%20ENSMUSG00000039286&amp;genes=ENSMUSG00000039286&amp;mirnas=mmu-miR-27a-3p&amp;threshold=0)">(/DianaTools/index.php?r=miroT_CDS/results&amp;keywords=mmu-miR-27a-3p%20ENSMUSG00000039286&amp;genes=ENSMUSG00000039286&amp;mirnas=mmu-miR-27a-3p&amp;threshold=0)</a> |
| Soga3 (mmu) ⓘ  | mmu-miR-27a-3p ⓘ |  | 0.589<br><a href="(/DianaTools/index.php?r=miroT_CDS/results&amp;keywords=mmu-miR-27a-3p%20ENSMUSG00000038916&amp;genes=ENSMUSG00000038916&amp;mirnas=mmu-miR-27a-3p&amp;threshold=0)">(/DianaTools/index.php?r=miroT_CDS/results&amp;keywords=mmu-miR-27a-3p%20ENSMUSG00000038916&amp;genes=ENSMUSG00000038916&amp;mirnas=mmu-miR-27a-3p&amp;threshold=0)</a> |
| Dock10 (mmu) ⓘ | mmu-miR-27a-3p ⓘ |  | 0.586<br><a href="(/DianaTools/index.php?r=miroT_CDS/results&amp;keywords=mmu-miR-27a-3p%20ENSMUSG00000038608&amp;genes=ENSMUSG00000038608&amp;mirnas=mmu-miR-27a-3p&amp;threshold=0)">(/DianaTools/index.php?r=miroT_CDS/results&amp;keywords=mmu-miR-27a-3p%20ENSMUSG00000038608&amp;genes=ENSMUSG00000038608&amp;mirnas=mmu-miR-27a-3p&amp;threshold=0)</a> |

We have placed cookies on your device to help make this website and the services we offer better. By using this site, you agree to the use of cookies. [Learn more](#) ([\(/DianaTools/index.php?r=site/terms\)]((/DianaTools/index.php?r=site/terms)))

I accept

|                  |                  |                                                                                      |                                                                                                                                                                                                                                                                                                                                                                |
|------------------|------------------|--------------------------------------------------------------------------------------|----------------------------------------------------------------------------------------------------------------------------------------------------------------------------------------------------------------------------------------------------------------------------------------------------------------------------------------------------------------|
| Ptpn3 (mmu) ⓘ    | mmu-miR-27a-3p ⓘ |    | 0.584<br><a href="/DianaTools/index.php?r=microT_CDS/results&amp;keywords=mmu-miR-27a-3p%20ENSMUSG00000038764&amp;genes=ENSMUSG00000038764&amp;mirnas=mmu-miR-27a-3p&amp;threshold=0">(/DianaTools/index.php?r=microT_CDS/results&amp;keywords=mmu-miR-27a-3p%20ENSMUSG00000038764&amp;genes=ENSMUSG00000038764&amp;mirnas=mmu-miR-27a-3p&amp;threshold=0)</a> |
| Herc1 (mmu) ⓘ    | mmu-miR-27a-3p ⓘ |    | 0.577<br><a href="/DianaTools/index.php?r=microT_CDS/results&amp;keywords=mmu-miR-27a-3p%20ENSMUSG00000038664&amp;genes=ENSMUSG00000038664&amp;mirnas=mmu-miR-27a-3p&amp;threshold=0">(/DianaTools/index.php?r=microT_CDS/results&amp;keywords=mmu-miR-27a-3p%20ENSMUSG00000038664&amp;genes=ENSMUSG00000038664&amp;mirnas=mmu-miR-27a-3p&amp;threshold=0)</a> |
| Phf20 (mmu) ⓘ    | mmu-miR-27a-3p ⓘ |    | 0.570<br><a href="/DianaTools/index.php?r=microT_CDS/results&amp;keywords=mmu-miR-27a-3p%20ENSMUSG00000038116&amp;genes=ENSMUSG00000038116&amp;mirnas=mmu-miR-27a-3p&amp;threshold=0">(/DianaTools/index.php?r=microT_CDS/results&amp;keywords=mmu-miR-27a-3p%20ENSMUSG00000038116&amp;genes=ENSMUSG00000038116&amp;mirnas=mmu-miR-27a-3p&amp;threshold=0)</a> |
| Arhgap18 (mmu) ⓘ | mmu-miR-27a-3p ⓘ |    | 0.567<br><a href="/DianaTools/index.php?r=microT_CDS/results&amp;keywords=mmu-miR-27a-3p%20ENSMUSG00000039031&amp;genes=ENSMUSG00000039031&amp;mirnas=mmu-miR-27a-3p&amp;threshold=0">(/DianaTools/index.php?r=microT_CDS/results&amp;keywords=mmu-miR-27a-3p%20ENSMUSG00000039031&amp;genes=ENSMUSG00000039031&amp;mirnas=mmu-miR-27a-3p&amp;threshold=0)</a> |
| Prrc2b (mmu) ⓘ   | mmu-miR-27a-3p ⓘ |    | 0.563<br><a href="/DianaTools/index.php?r=microT_CDS/results&amp;keywords=mmu-miR-27a-3p%20ENSMUSG00000039262&amp;genes=ENSMUSG00000039262&amp;mirnas=mmu-miR-27a-3p&amp;threshold=0">(/DianaTools/index.php?r=microT_CDS/results&amp;keywords=mmu-miR-27a-3p%20ENSMUSG00000039262&amp;genes=ENSMUSG00000039262&amp;mirnas=mmu-miR-27a-3p&amp;threshold=0)</a> |
| Edem2 (mmu) ⓘ    | mmu-miR-27a-3p ⓘ |    | 0.547<br><a href="/DianaTools/index.php?r=microT_CDS/results&amp;keywords=mmu-miR-27a-3p%20ENSMUSG00000038312&amp;genes=ENSMUSG00000038312&amp;mirnas=mmu-miR-27a-3p&amp;threshold=0">(/DianaTools/index.php?r=microT_CDS/results&amp;keywords=mmu-miR-27a-3p%20ENSMUSG00000038312&amp;genes=ENSMUSG00000038312&amp;mirnas=mmu-miR-27a-3p&amp;threshold=0)</a> |
| Wdr26 (mmu) ⓘ    | mmu-miR-27a-3p ⓘ |    | 0.541<br><a href="/DianaTools/index.php?r=microT_CDS/results&amp;keywords=mmu-miR-27a-3p%20ENSMUSG00000038733&amp;genes=ENSMUSG00000038733&amp;mirnas=mmu-miR-27a-3p&amp;threshold=0">(/DianaTools/index.php?r=microT_CDS/results&amp;keywords=mmu-miR-27a-3p%20ENSMUSG00000038733&amp;genes=ENSMUSG00000038733&amp;mirnas=mmu-miR-27a-3p&amp;threshold=0)</a> |
| Cdkn2aip (mmu) ⓘ | mmu-miR-27a-3p ⓘ |  | 0.499<br><a href="/DianaTools/index.php?r=microT_CDS/results&amp;keywords=mmu-miR-27a-3p%20ENSMUSG00000038069&amp;genes=ENSMUSG00000038069&amp;mirnas=mmu-miR-27a-3p&amp;threshold=0">(/DianaTools/index.php?r=microT_CDS/results&amp;keywords=mmu-miR-27a-3p%20ENSMUSG00000038069&amp;genes=ENSMUSG00000038069&amp;mirnas=mmu-miR-27a-3p&amp;threshold=0)</a> |
| Abhd2 (mmu) ⓘ    | mmu-miR-27a-3p ⓘ |  | 0.471<br><a href="/DianaTools/index.php?r=microT_CDS/results&amp;keywords=mmu-miR-27a-3p%20ENSMUSG00000039202&amp;genes=ENSMUSG00000039202&amp;mirnas=mmu-miR-27a-3p&amp;threshold=0">(/DianaTools/index.php?r=microT_CDS/results&amp;keywords=mmu-miR-27a-3p%20ENSMUSG00000039202&amp;genes=ENSMUSG00000039202&amp;mirnas=mmu-miR-27a-3p&amp;threshold=0)</a> |
| Nrn1 (mmu) ⓘ     | mmu-miR-27a-3p ⓘ |  | 0.467<br><a href="/DianaTools/index.php?r=microT_CDS/results&amp;keywords=mmu-miR-27a-3p%20ENSMUSG00000039114&amp;genes=ENSMUSG00000039114&amp;mirnas=mmu-miR-27a-3p&amp;threshold=0">(/DianaTools/index.php?r=microT_CDS/results&amp;keywords=mmu-miR-27a-3p%20ENSMUSG00000039114&amp;genes=ENSMUSG00000039114&amp;mirnas=mmu-miR-27a-3p&amp;threshold=0)</a> |
| Prune2 (mmu) ⓘ   | mmu-miR-27a-3p ⓘ |  | 0.466<br><a href="/DianaTools/index.php?r=microT_CDS/results&amp;keywords=mmu-miR-27a-3p%20ENSMUSG00000039126&amp;genes=ENSMUSG00000039126&amp;mirnas=mmu-miR-27a-3p&amp;threshold=0">(/DianaTools/index.php?r=microT_CDS/results&amp;keywords=mmu-miR-27a-3p%20ENSMUSG00000039126&amp;genes=ENSMUSG00000039126&amp;mirnas=mmu-miR-27a-3p&amp;threshold=0)</a> |

We have placed cookies on your device to help make this website and the services we offer better. By using this site, you agree to the use of cookies. [Learn more \(/DianaTools/index.php?r=site/terms\)](/DianaTools/index.php?r=site/terms)

I accept

|                  |                  |  |                                                                                                                                                                                           |
|------------------|------------------|--|-------------------------------------------------------------------------------------------------------------------------------------------------------------------------------------------|
|                  |                  |  | <a href="#">0.453 (/DianaTools/index.php?r=miroT_CDS/results&amp;keywords=mmu-miR-27a-3p%20ENSMUSG00000038126&amp;genes=ENSMUSG00000038126&amp;mirnas=mmu-miR-27a-3p&amp;threshold=0)</a> |
| Mphosph9 (mmu) ⓘ | mmu-miR-27a-3p ⓘ |  |                                                                                                                                                                                           |
| Btbd10 (mmu) ⓘ   | mmu-miR-27a-3p ⓘ |  | -                                                                                                                                                                                         |
| Sesn1 (mmu) ⓘ    | mmu-miR-27a-3p ⓘ |  | -                                                                                                                                                                                         |
| Acer2 (mmu) ⓘ    | mmu-miR-27a-3p ⓘ |  | -                                                                                                                                                                                         |
| Mapkap1 (mmu) ⓘ  | mmu-miR-27a-3p ⓘ |  | -                                                                                                                                                                                         |
| Kat7 (mmu) ⓘ     | mmu-miR-27a-3p ⓘ |  | -                                                                                                                                                                                         |
| Ncoa6 (mmu) ⓘ    | mmu-miR-27a-3p ⓘ |  | -                                                                                                                                                                                         |
| Rreb1 (mmu) ⓘ    | mmu-miR-27a-3p ⓘ |  | -                                                                                                                                                                                         |
| Kmt2c (mmu) ⓘ    | mmu-miR-27a-3p ⓘ |  | -                                                                                                                                                                                         |
| Cep44 (mmu) ⓘ    | mmu-miR-27a-3p ⓘ |  | -                                                                                                                                                                                         |
| Rbpj (mmu) ⓘ     | mmu-miR-27a-3p ⓘ |  | -                                                                                                                                                                                         |
| Tusc3 (mmu) ⓘ    | mmu-miR-27a-3p ⓘ |  | -                                                                                                                                                                                         |
| Prc1 (mmu) ⓘ     | mmu-miR-27a-3p ⓘ |  | -                                                                                                                                                                                         |
| Ncoa7 (mmu) ⓘ    | mmu-miR-27a-3p ⓘ |  | -                                                                                                                                                                                         |
| Srrm2 (mmu) ⓘ    | mmu-miR-27a-3p ⓘ |  | -                                                                                                                                                                                         |
| Srcin1 (mmu) ⓘ   | mmu-miR-27a-3p ⓘ |  | -                                                                                                                                                                                         |
| Daglb (mmu) ⓘ    | mmu-miR-27a-3p ⓘ |  | -                                                                                                                                                                                         |
| Grtp1 (mmu) ⓘ    | mmu-miR-27a-3p ⓘ |  | -                                                                                                                                                                                         |
| Prrc2b (mmu) ⓘ   | mmu-miR-27a-3p ⓘ |  | -                                                                                                                                                                                         |
| Sec24c (mmu) ⓘ   | mmu-miR-27a-3p ⓘ |  | -                                                                                                                                                                                         |
| Sec24c (mmu) ⓘ   | mmu-miR-27a-3p ⓘ |  | -                                                                                                                                                                                         |
| Usp38 (mmu) ⓘ    | mmu-miR-27a-3p ⓘ |  | -                                                                                                                                                                                         |
| Usp38 (mmu) ⓘ    | mmu-miR-27a-3p ⓘ |  | -                                                                                                                                                                                         |
| Myo16 (mmu) ⓘ    | mmu-miR-27a-3p ⓘ |  | -                                                                                                                                                                                         |
| Cntnap2 (mmu) ⓘ  | mmu-miR-27a-3p ⓘ |  | -                                                                                                                                                                                         |
| Pptc7 (mmu) ⓘ    | mmu-miR-27a-3p ⓘ |  | -                                                                                                                                                                                         |
| Pptc7 (mmu) ⓘ    | mmu-miR-27a-3p ⓘ |  | -                                                                                                                                                                                         |
| Nfe2l1 (mmu) ⓘ   | mmu-miR-27a-3p ⓘ |  | -                                                                                                                                                                                         |
| Golga4 (mmu) ⓘ   | mmu-miR-27a-3p ⓘ |  | -                                                                                                                                                                                         |
| Fbxo8 (mmu) ⓘ    | mmu-miR-27a-3p ⓘ |  | -                                                                                                                                                                                         |

We have placed cookies on your device to help make this website and the services we offer better. By using this site, you agree to the use of cookies. [Learn more \(/DianaTools/index.php?r=site/terms\)](#).

I accept

|                  |                  |    |                                                                                                                                                               |
|------------------|------------------|----|---------------------------------------------------------------------------------------------------------------------------------------------------------------|
| Zer1 (mmu) ⓘ     | mmu-miR-27a-3p ⓘ | IP | -                                                                                                                                                             |
| Stub1 (mmu) ⓘ    | mmu-miR-27a-3p ⓘ | IP | -                                                                                                                                                             |
| C1s1 (mmu) ⓘ     | mmu-miR-27a-3p ⓘ | IP | -                                                                                                                                                             |
| Ythdf1 (mmu) ⓘ   | mmu-miR-27a-3p ⓘ | IP | -                                                                                                                                                             |
| Mrps6 (mmu) ⓘ    | mmu-miR-27a-3p ⓘ | IP | -                                                                                                                                                             |
| Tapbp1 (mmu) ⓘ   | mmu-miR-27a-3p ⓘ | IP | -                                                                                                                                                             |
| Camk4 (mmu) ⓘ    | mmu-miR-27a-3p ⓘ | IP | -                                                                                                                                                             |
| Prpf18 (mmu) ⓘ   | mmu-miR-27a-3p ⓘ | IP | -                                                                                                                                                             |
| Lmtk2 (mmu) ⓘ    | mmu-miR-27a-3p ⓘ | IP | -                                                                                                                                                             |
| Foxf2 (mmu) ⓘ    | mmu-miR-27a-3p ⓘ | IP | -                                                                                                                                                             |
| Degs1 (mmu) ⓘ    | mmu-miR-27a-3p ⓘ | IP | -                                                                                                                                                             |
| Fam120a (mmu) ⓘ  | mmu-miR-27a-3p ⓘ | IP | -                                                                                                                                                             |
| Mlxip (mmu) ⓘ    | mmu-miR-27a-3p ⓘ | IP | -                                                                                                                                                             |
| Mlxip (mmu) ⓘ    | mmu-miR-27a-3p ⓘ | IP | -                                                                                                                                                             |
| Trappc11 (mmu) ⓘ | mmu-miR-27a-3p ⓘ | IP | -                                                                                                                                                             |
| Cdk19 (mmu) ⓘ    | mmu-miR-27a-3p ⓘ | IP | -                                                                                                                                                             |
| Arap2 (mmu) ⓘ    | mmu-miR-27a-3p ⓘ | IP | -                                                                                                                                                             |
| Krmt2c (mmu) ⓘ   | mmu-miR-27a-3p ⓘ | IP | -                                                                                                                                                             |
| Fig4 (mmu) ⓘ     | mmu-miR-27a-3p ⓘ | IP | -                                                                                                                                                             |
| Pak1ip1 (mmu) ⓘ  | mmu-miR-27a-3p ⓘ | IP | -                                                                                                                                                             |
| Plcl1 (mmu) ⓘ    | mmu-miR-27a-3p ⓘ | IP | -                                                                                                                                                             |
| Megf9 (mmu) ⓘ    | mmu-miR-27a-3p ⓘ | IP | -                                                                                                                                                             |
| Szrd1 (mmu) ⓘ    | mmu-miR-27a-3p ⓘ | IP | 1.000<br>(/DianaTools/index.php?r=miroT_CDS/results&keywords=mmu-miR-27a-3p%20ENSMUSG00000040842&genes=ENSMUSG00000040842&mirnas=mmu-miR-27a-3p&threshold=0). |
| Edrf1 (mmu) ⓘ    | mmu-miR-27a-3p ⓘ | IP | 0.999<br>(/DianaTools/index.php?r=miroT_CDS/results&keywords=mmu-miR-27a-3p%20ENSMUSG00000039990&genes=ENSMUSG00000039990&mirnas=mmu-miR-27a-3p&threshold=0). |
| Zfp800 (mmu) ⓘ   | mmu-miR-27a-3p ⓘ | IP | 0.998<br>(/DianaTools/index.php?r=miroT_CDS/results&keywords=mmu-miR-27a-3p%20ENSMUSG00000039841&genes=ENSMUSG00000039841&mirnas=mmu-miR-27a-3p&threshold=0). |

We have placed cookies on your device to help make this website and the services we offer better. By using this site, you agree to the use of cookies. [Learn more](#) (/DianaTools/index.php?r=site/terms).

I accept

|                 |                  |                                                                                      |                                                                                                                                                                                                                                                                                                                                                              |
|-----------------|------------------|--------------------------------------------------------------------------------------|--------------------------------------------------------------------------------------------------------------------------------------------------------------------------------------------------------------------------------------------------------------------------------------------------------------------------------------------------------------|
| Rsb11 (mmu) ⓘ   | mmu-miR-27a-3p ⓘ |    | 0.994<br><a href="/DianaTools/index.php?r=miroT_CDS/results&amp;keywords=mmu-miR-27a-3p%20ENSMUSG00000039968&amp;genes=ENSMUSG00000039968&amp;mirnas=mmu-miR-27a-3p&amp;threshold=0">(/DianaTools/index.php?r=miroT_CDS/results&amp;keywords=mmu-miR-27a-3p%20ENSMUSG00000039968&amp;genes=ENSMUSG00000039968&amp;mirnas=mmu-miR-27a-3p&amp;threshold=0)</a> |
| Suco (mmu) ⓘ    | mmu-miR-27a-3p ⓘ |    | 0.992<br><a href="/DianaTools/index.php?r=miroT_CDS/results&amp;keywords=mmu-miR-27a-3p%20ENSMUSG00000040297&amp;genes=ENSMUSG00000040297&amp;mirnas=mmu-miR-27a-3p&amp;threshold=0">(/DianaTools/index.php?r=miroT_CDS/results&amp;keywords=mmu-miR-27a-3p%20ENSMUSG00000040297&amp;genes=ENSMUSG00000040297&amp;mirnas=mmu-miR-27a-3p&amp;threshold=0)</a> |
| Zfp597 (mmu) ⓘ  | mmu-miR-27a-3p ⓘ |    | 0.982<br><a href="/DianaTools/index.php?r=miroT_CDS/results&amp;keywords=mmu-miR-27a-3p%20ENSMUSG00000039789&amp;genes=ENSMUSG00000039789&amp;mirnas=mmu-miR-27a-3p&amp;threshold=0">(/DianaTools/index.php?r=miroT_CDS/results&amp;keywords=mmu-miR-27a-3p%20ENSMUSG00000039789&amp;genes=ENSMUSG00000039789&amp;mirnas=mmu-miR-27a-3p&amp;threshold=0)</a> |
| Fzd7 (mmu) ⓘ    | mmu-miR-27a-3p ⓘ |    | 0.973<br><a href="/DianaTools/index.php?r=miroT_CDS/results&amp;keywords=mmu-miR-27a-3p%20ENSMUSG00000041075&amp;genes=ENSMUSG00000041075&amp;mirnas=mmu-miR-27a-3p&amp;threshold=0">(/DianaTools/index.php?r=miroT_CDS/results&amp;keywords=mmu-miR-27a-3p%20ENSMUSG00000041075&amp;genes=ENSMUSG00000041075&amp;mirnas=mmu-miR-27a-3p&amp;threshold=0)</a> |
| Dnm3 (mmu) ⓘ    | mmu-miR-27a-3p ⓘ |    | 0.961<br><a href="/DianaTools/index.php?r=miroT_CDS/results&amp;keywords=mmu-miR-27a-3p%20ENSMUSG00000040265&amp;genes=ENSMUSG00000040265&amp;mirnas=mmu-miR-27a-3p&amp;threshold=0">(/DianaTools/index.php?r=miroT_CDS/results&amp;keywords=mmu-miR-27a-3p%20ENSMUSG00000040265&amp;genes=ENSMUSG00000040265&amp;mirnas=mmu-miR-27a-3p&amp;threshold=0)</a> |
| Rgl2 (mmu) ⓘ    | mmu-miR-27a-3p ⓘ |    | 0.954<br><a href="/DianaTools/index.php?r=miroT_CDS/results&amp;keywords=mmu-miR-27a-3p%20ENSMUSG00000041354&amp;genes=ENSMUSG00000041354&amp;mirnas=mmu-miR-27a-3p&amp;threshold=0">(/DianaTools/index.php?r=miroT_CDS/results&amp;keywords=mmu-miR-27a-3p%20ENSMUSG00000041354&amp;genes=ENSMUSG00000041354&amp;mirnas=mmu-miR-27a-3p&amp;threshold=0)</a> |
| Rfx3 (mmu) ⓘ    | mmu-miR-27a-3p ⓘ |    | 0.935<br><a href="/DianaTools/index.php?r=miroT_CDS/results&amp;keywords=mmu-miR-27a-3p%20ENSMUSG00000040929&amp;genes=ENSMUSG00000040929&amp;mirnas=mmu-miR-27a-3p&amp;threshold=0">(/DianaTools/index.php?r=miroT_CDS/results&amp;keywords=mmu-miR-27a-3p%20ENSMUSG00000040929&amp;genes=ENSMUSG00000040929&amp;mirnas=mmu-miR-27a-3p&amp;threshold=0)</a> |
| Chd7 (mmu) ⓘ    | mmu-miR-27a-3p ⓘ |  | 0.888<br><a href="/DianaTools/index.php?r=miroT_CDS/results&amp;keywords=mmu-miR-27a-3p%20ENSMUSG00000041235&amp;genes=ENSMUSG00000041235&amp;mirnas=mmu-miR-27a-3p&amp;threshold=0">(/DianaTools/index.php?r=miroT_CDS/results&amp;keywords=mmu-miR-27a-3p%20ENSMUSG00000041235&amp;genes=ENSMUSG00000041235&amp;mirnas=mmu-miR-27a-3p&amp;threshold=0)</a> |
| Tox (mmu) ⓘ     | mmu-miR-27a-3p ⓘ |  | 0.888<br><a href="/DianaTools/index.php?r=miroT_CDS/results&amp;keywords=mmu-miR-27a-3p%20ENSMUSG00000041272&amp;genes=ENSMUSG00000041272&amp;mirnas=mmu-miR-27a-3p&amp;threshold=0">(/DianaTools/index.php?r=miroT_CDS/results&amp;keywords=mmu-miR-27a-3p%20ENSMUSG00000041272&amp;genes=ENSMUSG00000041272&amp;mirnas=mmu-miR-27a-3p&amp;threshold=0)</a> |
| Tmem194 (mmu) ⓘ | mmu-miR-27a-3p ⓘ |  | 0.828<br><a href="/DianaTools/index.php?r=miroT_CDS/results&amp;keywords=mmu-miR-27a-3p%20ENSMUSG00000040195&amp;genes=ENSMUSG00000040195&amp;mirnas=mmu-miR-27a-3p&amp;threshold=0">(/DianaTools/index.php?r=miroT_CDS/results&amp;keywords=mmu-miR-27a-3p%20ENSMUSG00000040195&amp;genes=ENSMUSG00000040195&amp;mirnas=mmu-miR-27a-3p&amp;threshold=0)</a> |
| Dtx4 (mmu) ⓘ    | mmu-miR-27a-3p ⓘ |  | 0.819<br><a href="/DianaTools/index.php?r=miroT_CDS/results&amp;keywords=mmu-miR-27a-3p%20ENSMUSG00000039982&amp;genes=ENSMUSG00000039982&amp;mirnas=mmu-miR-27a-3p&amp;threshold=0">(/DianaTools/index.php?r=miroT_CDS/results&amp;keywords=mmu-miR-27a-3p%20ENSMUSG00000039982&amp;genes=ENSMUSG00000039982&amp;mirnas=mmu-miR-27a-3p&amp;threshold=0)</a> |

We have placed cookies on your device to help make this website and the services we offer better. By using this site, you agree to the use of cookies. [Learn more](#) (</DianaTools/index.php?r=site/terms>).

I accept

|                 |                  |                                                                                      |                                                                                                                                                                                                                                                                                                                                                                                  |
|-----------------|------------------|--------------------------------------------------------------------------------------|----------------------------------------------------------------------------------------------------------------------------------------------------------------------------------------------------------------------------------------------------------------------------------------------------------------------------------------------------------------------------------|
| Ankib1 (mmu) ⓘ  | mmu-miR-27a-3p ⓘ |    | <a href="#">0.802</a><br><a href="(/DianaTools/index.php?r=microT_CDS/results&amp;keywords=mmu-miR-27a-3p%20ENSMUSG00000040351&amp;genes=ENSMUSG00000040351&amp;mirnas=mmu-miR-27a-3p&amp;threshold=0)">(/DianaTools/index.php?r=microT_CDS/results&amp;keywords=mmu-miR-27a-3p%20ENSMUSG00000040351&amp;genes=ENSMUSG00000040351&amp;mirnas=mmu-miR-27a-3p&amp;threshold=0)</a> |
| Zc3h12d (mmu) ⓘ | mmu-miR-27a-3p ⓘ |    | <a href="#">0.801</a><br><a href="(/DianaTools/index.php?r=microT_CDS/results&amp;keywords=mmu-miR-27a-3p%20ENSMUSG00000039981&amp;genes=ENSMUSG00000039981&amp;mirnas=mmu-miR-27a-3p&amp;threshold=0)">(/DianaTools/index.php?r=microT_CDS/results&amp;keywords=mmu-miR-27a-3p%20ENSMUSG00000039981&amp;genes=ENSMUSG00000039981&amp;mirnas=mmu-miR-27a-3p&amp;threshold=0)</a> |
| Gramd1b (mmu) ⓘ | mmu-miR-27a-3p ⓘ |    | <a href="#">0.790</a><br><a href="(/DianaTools/index.php?r=microT_CDS/results&amp;keywords=mmu-miR-27a-3p%20ENSMUSG00000040111&amp;genes=ENSMUSG00000040111&amp;mirnas=mmu-miR-27a-3p&amp;threshold=0)">(/DianaTools/index.php?r=microT_CDS/results&amp;keywords=mmu-miR-27a-3p%20ENSMUSG00000040111&amp;genes=ENSMUSG00000040111&amp;mirnas=mmu-miR-27a-3p&amp;threshold=0)</a> |
| Htr2c (mmu) ⓘ   | mmu-miR-27a-3p ⓘ |    | <a href="#">0.780</a><br><a href="(/DianaTools/index.php?r=microT_CDS/results&amp;keywords=mmu-miR-27a-3p%20ENSMUSG00000041380&amp;genes=ENSMUSG00000041380&amp;mirnas=mmu-miR-27a-3p&amp;threshold=0)">(/DianaTools/index.php?r=microT_CDS/results&amp;keywords=mmu-miR-27a-3p%20ENSMUSG00000041380&amp;genes=ENSMUSG00000041380&amp;mirnas=mmu-miR-27a-3p&amp;threshold=0)</a> |
| St8sia4 (mmu) ⓘ | mmu-miR-27a-3p ⓘ |    | <a href="#">0.770</a><br><a href="(/DianaTools/index.php?r=microT_CDS/results&amp;keywords=mmu-miR-27a-3p%20ENSMUSG00000040710&amp;genes=ENSMUSG00000040710&amp;mirnas=mmu-miR-27a-3p&amp;threshold=0)">(/DianaTools/index.php?r=microT_CDS/results&amp;keywords=mmu-miR-27a-3p%20ENSMUSG00000040710&amp;genes=ENSMUSG00000040710&amp;mirnas=mmu-miR-27a-3p&amp;threshold=0)</a> |
| St8sia4 (mmu) ⓘ | mmu-miR-27a-3p ⓘ |    | <a href="#">0.770</a><br><a href="(/DianaTools/index.php?r=microT_CDS/results&amp;keywords=mmu-miR-27a-3p%20ENSMUSG00000040710&amp;genes=ENSMUSG00000040710&amp;mirnas=mmu-miR-27a-3p&amp;threshold=0)">(/DianaTools/index.php?r=microT_CDS/results&amp;keywords=mmu-miR-27a-3p%20ENSMUSG00000040710&amp;genes=ENSMUSG00000040710&amp;mirnas=mmu-miR-27a-3p&amp;threshold=0)</a> |
| Ildr2 (mmu) ⓘ   | mmu-miR-27a-3p ⓘ |   | <a href="#">0.754</a><br><a href="(/DianaTools/index.php?r=microT_CDS/results&amp;keywords=mmu-miR-27a-3p%20ENSMUSG00000040612&amp;genes=ENSMUSG00000040612&amp;mirnas=mmu-miR-27a-3p&amp;threshold=0)">(/DianaTools/index.php?r=microT_CDS/results&amp;keywords=mmu-miR-27a-3p%20ENSMUSG00000040612&amp;genes=ENSMUSG00000040612&amp;mirnas=mmu-miR-27a-3p&amp;threshold=0)</a> |
| Zfp704 (mmu) ⓘ  | mmu-miR-27a-3p ⓘ |  | <a href="#">0.735</a><br><a href="(/DianaTools/index.php?r=microT_CDS/results&amp;keywords=mmu-miR-27a-3p%20ENSMUSG00000040209&amp;genes=ENSMUSG00000040209&amp;mirnas=mmu-miR-27a-3p&amp;threshold=0)">(/DianaTools/index.php?r=microT_CDS/results&amp;keywords=mmu-miR-27a-3p%20ENSMUSG00000040209&amp;genes=ENSMUSG00000040209&amp;mirnas=mmu-miR-27a-3p&amp;threshold=0)</a> |
| Slc7a5 (mmu) ⓘ  | mmu-miR-27a-3p ⓘ |  | <a href="#">0.735</a><br><a href="(/DianaTools/index.php?r=microT_CDS/results&amp;keywords=mmu-miR-27a-3p%20ENSMUSG00000040010&amp;genes=ENSMUSG00000040010&amp;mirnas=mmu-miR-27a-3p&amp;threshold=0)">(/DianaTools/index.php?r=microT_CDS/results&amp;keywords=mmu-miR-27a-3p%20ENSMUSG00000040010&amp;genes=ENSMUSG00000040010&amp;mirnas=mmu-miR-27a-3p&amp;threshold=0)</a> |
| Lats1 (mmu) ⓘ   | mmu-miR-27a-3p ⓘ |  | <a href="#">0.705</a><br><a href="(/DianaTools/index.php?r=microT_CDS/results&amp;keywords=mmu-miR-27a-3p%20ENSMUSG00000040021&amp;genes=ENSMUSG00000040021&amp;mirnas=mmu-miR-27a-3p&amp;threshold=0)">(/DianaTools/index.php?r=microT_CDS/results&amp;keywords=mmu-miR-27a-3p%20ENSMUSG00000040021&amp;genes=ENSMUSG00000040021&amp;mirnas=mmu-miR-27a-3p&amp;threshold=0)</a> |
| Lats1 (mmu) ⓘ   | mmu-miR-27a-3p ⓘ |  | <a href="#">0.705</a><br><a href="(/DianaTools/index.php?r=microT_CDS/results&amp;keywords=mmu-miR-27a-3p%20ENSMUSG00000040021&amp;genes=ENSMUSG00000040021&amp;mirnas=mmu-miR-27a-3p&amp;threshold=0)">(/DianaTools/index.php?r=microT_CDS/results&amp;keywords=mmu-miR-27a-3p%20ENSMUSG00000040021&amp;genes=ENSMUSG00000040021&amp;mirnas=mmu-miR-27a-3p&amp;threshold=0)</a> |

We have placed cookies on your device to help make this website and the services we offer better. By using this site, you agree to the use of cookies. [Learn more](#) ([/DianaTools/index.php?r=site/terms]((/DianaTools/index.php?r=site/terms))).

I accept

|                  |                  |                                                                                      |                                                                                                                                                                                                                                                                                                                                                                  |
|------------------|------------------|--------------------------------------------------------------------------------------|------------------------------------------------------------------------------------------------------------------------------------------------------------------------------------------------------------------------------------------------------------------------------------------------------------------------------------------------------------------|
| Pnrc1 (mmu) ⓘ    | mmu-miR-27a-3p ⓘ |    | 0.694<br><a href="(/DianaTools/index.php?r=microT_CDS/results&amp;keywords=mmu-miR-27a-3p%20ENSMUSG00000040128&amp;genes=ENSMUSG00000040128&amp;mirnas=mmu-miR-27a-3p&amp;threshold=0)">(/DianaTools/index.php?r=microT_CDS/results&amp;keywords=mmu-miR-27a-3p%20ENSMUSG00000040128&amp;genes=ENSMUSG00000040128&amp;mirnas=mmu-miR-27a-3p&amp;threshold=0)</a> |
| Pnrc1 (mmu) ⓘ    | mmu-miR-27a-3p ⓘ |    | 0.694<br><a href="(/DianaTools/index.php?r=microT_CDS/results&amp;keywords=mmu-miR-27a-3p%20ENSMUSG00000040128&amp;genes=ENSMUSG00000040128&amp;mirnas=mmu-miR-27a-3p&amp;threshold=0)">(/DianaTools/index.php?r=microT_CDS/results&amp;keywords=mmu-miR-27a-3p%20ENSMUSG00000040128&amp;genes=ENSMUSG00000040128&amp;mirnas=mmu-miR-27a-3p&amp;threshold=0)</a> |
| Pvr (mmu) ⓘ      | mmu-miR-27a-3p ⓘ |    | 0.680<br><a href="(/DianaTools/index.php?r=microT_CDS/results&amp;keywords=mmu-miR-27a-3p%20ENSMUSG00000040511&amp;genes=ENSMUSG00000040511&amp;mirnas=mmu-miR-27a-3p&amp;threshold=0)">(/DianaTools/index.php?r=microT_CDS/results&amp;keywords=mmu-miR-27a-3p%20ENSMUSG00000040511&amp;genes=ENSMUSG00000040511&amp;mirnas=mmu-miR-27a-3p&amp;threshold=0)</a> |
| Epg5 (mmu) ⓘ     | mmu-miR-27a-3p ⓘ |    | 0.624<br><a href="(/DianaTools/index.php?r=microT_CDS/results&amp;keywords=mmu-miR-27a-3p%20ENSMUSG00000039840&amp;genes=ENSMUSG00000039840&amp;mirnas=mmu-miR-27a-3p&amp;threshold=0)">(/DianaTools/index.php?r=microT_CDS/results&amp;keywords=mmu-miR-27a-3p%20ENSMUSG00000039840&amp;genes=ENSMUSG00000039840&amp;mirnas=mmu-miR-27a-3p&amp;threshold=0)</a> |
| Ppip5k2 (mmu) ⓘ  | mmu-miR-27a-3p ⓘ |    | 0.617<br><a href="(/DianaTools/index.php?r=microT_CDS/results&amp;keywords=mmu-miR-27a-3p%20ENSMUSG00000040648&amp;genes=ENSMUSG00000040648&amp;mirnas=mmu-miR-27a-3p&amp;threshold=0)">(/DianaTools/index.php?r=microT_CDS/results&amp;keywords=mmu-miR-27a-3p%20ENSMUSG00000040648&amp;genes=ENSMUSG00000040648&amp;mirnas=mmu-miR-27a-3p&amp;threshold=0)</a> |
| Usp1 (mmu) ⓘ     | mmu-miR-27a-3p ⓘ |    | 0.613<br><a href="(/DianaTools/index.php?r=microT_CDS/results&amp;keywords=mmu-miR-27a-3p%20ENSMUSG00000041264&amp;genes=ENSMUSG00000041264&amp;mirnas=mmu-miR-27a-3p&amp;threshold=0)">(/DianaTools/index.php?r=microT_CDS/results&amp;keywords=mmu-miR-27a-3p%20ENSMUSG00000041264&amp;genes=ENSMUSG00000041264&amp;mirnas=mmu-miR-27a-3p&amp;threshold=0)</a> |
| Zmiz2 (mmu) ⓘ    | mmu-miR-27a-3p ⓘ |    | 0.611<br><a href="(/DianaTools/index.php?r=microT_CDS/results&amp;keywords=mmu-miR-27a-3p%20ENSMUSG00000041164&amp;genes=ENSMUSG00000041164&amp;mirnas=mmu-miR-27a-3p&amp;threshold=0)">(/DianaTools/index.php?r=microT_CDS/results&amp;keywords=mmu-miR-27a-3p%20ENSMUSG00000041164&amp;genes=ENSMUSG00000041164&amp;mirnas=mmu-miR-27a-3p&amp;threshold=0)</a> |
| Zfp770 (mmu) ⓘ   | mmu-miR-27a-3p ⓘ |  | 0.607<br><a href="(/DianaTools/index.php?r=microT_CDS/results&amp;keywords=mmu-miR-27a-3p%20ENSMUSG00000040321&amp;genes=ENSMUSG00000040321&amp;mirnas=mmu-miR-27a-3p&amp;threshold=0)">(/DianaTools/index.php?r=microT_CDS/results&amp;keywords=mmu-miR-27a-3p%20ENSMUSG00000040321&amp;genes=ENSMUSG00000040321&amp;mirnas=mmu-miR-27a-3p&amp;threshold=0)</a> |
| Kihl42 (mmu) ⓘ   | mmu-miR-27a-3p ⓘ |  | 0.604<br><a href="(/DianaTools/index.php?r=microT_CDS/results&amp;keywords=mmu-miR-27a-3p%20ENSMUSG00000040102&amp;genes=ENSMUSG00000040102&amp;mirnas=mmu-miR-27a-3p&amp;threshold=0)">(/DianaTools/index.php?r=microT_CDS/results&amp;keywords=mmu-miR-27a-3p%20ENSMUSG00000040102&amp;genes=ENSMUSG00000040102&amp;mirnas=mmu-miR-27a-3p&amp;threshold=0)</a> |
| Ankrd13c (mmu) ⓘ | mmu-miR-27a-3p ⓘ |  | 0.602<br><a href="(/DianaTools/index.php?r=microT_CDS/results&amp;keywords=mmu-miR-27a-3p%20ENSMUSG00000039988&amp;genes=ENSMUSG00000039988&amp;mirnas=mmu-miR-27a-3p&amp;threshold=0)">(/DianaTools/index.php?r=microT_CDS/results&amp;keywords=mmu-miR-27a-3p%20ENSMUSG00000039988&amp;genes=ENSMUSG00000039988&amp;mirnas=mmu-miR-27a-3p&amp;threshold=0)</a> |
| Zbtb38 (mmu) ⓘ   | mmu-miR-27a-3p ⓘ |  | 0.598<br><a href="(/DianaTools/index.php?r=microT_CDS/results&amp;keywords=mmu-miR-27a-3p%20ENSMUSG00000040433&amp;genes=ENSMUSG00000040433&amp;mirnas=mmu-miR-27a-3p&amp;threshold=0)">(/DianaTools/index.php?r=microT_CDS/results&amp;keywords=mmu-miR-27a-3p%20ENSMUSG00000040433&amp;genes=ENSMUSG00000040433&amp;mirnas=mmu-miR-27a-3p&amp;threshold=0)</a> |

We have placed cookies on your device to help make this website and the services we offer better. By using this site, you agree to the use of cookies. [Learn more]((/DianaTools/index.php?r=site/terms)) ([/DianaTools/index.php?r=site/terms]((/DianaTools/index.php?r=site/terms))).

I accept

|                  |                  |                                                                                      |                                                                                                                                                                                                               |
|------------------|------------------|--------------------------------------------------------------------------------------|---------------------------------------------------------------------------------------------------------------------------------------------------------------------------------------------------------------|
| Gpr26 (mmu) ⓘ    | mmu-miR-27a-3p ⓘ |    | <a href="#">0.577</a><br><a href="#">(/DianaTools/index.php?r=microT_CDS/results&amp;keywords=mmu-miR-27a-3p%20ENSMUSG00000040125&amp;genes=ENSMUSG00000040125&amp;mirnas=mmu-miR-27a-3p&amp;threshold=0)</a> |
| Slc7a1 (mmu) ⓘ   | mmu-miR-27a-3p ⓘ |    | <a href="#">0.575</a><br><a href="#">(/DianaTools/index.php?r=microT_CDS/results&amp;keywords=mmu-miR-27a-3p%20ENSMUSG00000041313&amp;genes=ENSMUSG00000041313&amp;mirnas=mmu-miR-27a-3p&amp;threshold=0)</a> |
| Slc7a1 (mmu) ⓘ   | mmu-miR-27a-3p ⓘ |    | <a href="#">0.575</a><br><a href="#">(/DianaTools/index.php?r=microT_CDS/results&amp;keywords=mmu-miR-27a-3p%20ENSMUSG00000041313&amp;genes=ENSMUSG00000041313&amp;mirnas=mmu-miR-27a-3p&amp;threshold=0)</a> |
| Fam208a (mmu) ⓘ  | mmu-miR-27a-3p ⓘ |    | <a href="#">0.572</a><br><a href="#">(/DianaTools/index.php?r=microT_CDS/results&amp;keywords=mmu-miR-27a-3p%20ENSMUSG00000040651&amp;genes=ENSMUSG00000040651&amp;mirnas=mmu-miR-27a-3p&amp;threshold=0)</a> |
| Eif4h (mmu) ⓘ    | mmu-miR-27a-3p ⓘ |    | <a href="#">0.571</a><br><a href="#">(/DianaTools/index.php?r=microT_CDS/results&amp;keywords=mmu-miR-27a-3p%20ENSMUSG00000040731&amp;genes=ENSMUSG00000040731&amp;mirnas=mmu-miR-27a-3p&amp;threshold=0)</a> |
| Eif4h (mmu) ⓘ    | mmu-miR-27a-3p ⓘ |    | <a href="#">0.571</a><br><a href="#">(/DianaTools/index.php?r=microT_CDS/results&amp;keywords=mmu-miR-27a-3p%20ENSMUSG00000040731&amp;genes=ENSMUSG00000040731&amp;mirnas=mmu-miR-27a-3p&amp;threshold=0)</a> |
| Rdh7 (mmu) ⓘ     | mmu-miR-27a-3p ⓘ |    | <a href="#">0.569</a><br><a href="#">(/DianaTools/index.php?r=microT_CDS/results&amp;keywords=mmu-miR-27a-3p%20ENSMUSG00000040134&amp;genes=ENSMUSG00000040134&amp;mirnas=mmu-miR-27a-3p&amp;threshold=0)</a> |
| Ckap5 (mmu) ⓘ    | mmu-miR-27a-3p ⓘ |  | <a href="#">0.538</a><br><a href="#">(/DianaTools/index.php?r=microT_CDS/results&amp;keywords=mmu-miR-27a-3p%20ENSMUSG00000040549&amp;genes=ENSMUSG00000040549&amp;mirnas=mmu-miR-27a-3p&amp;threshold=0)</a> |
| Pcf11 (mmu) ⓘ    | mmu-miR-27a-3p ⓘ |  | <a href="#">0.529</a><br><a href="#">(/DianaTools/index.php?r=microT_CDS/results&amp;keywords=mmu-miR-27a-3p%20ENSMUSG00000041328&amp;genes=ENSMUSG00000041328&amp;mirnas=mmu-miR-27a-3p&amp;threshold=0)</a> |
| BC052040 (mmu) ⓘ | mmu-miR-27a-3p ⓘ |  | <a href="#">0.523</a><br><a href="#">(/DianaTools/index.php?r=microT_CDS/results&amp;keywords=mmu-miR-27a-3p%20ENSMUSG00000040282&amp;genes=ENSMUSG00000040282&amp;mirnas=mmu-miR-27a-3p&amp;threshold=0)</a> |
| Heca (mmu) ⓘ     | mmu-miR-27a-3p ⓘ |  | <a href="#">0.514</a><br><a href="#">(/DianaTools/index.php?r=microT_CDS/results&amp;keywords=mmu-miR-27a-3p%20ENSMUSG00000039879&amp;genes=ENSMUSG00000039879&amp;mirnas=mmu-miR-27a-3p&amp;threshold=0)</a> |

We have placed cookies on your device to help make this website and the services we offer better. By using this site, you agree to the use of cookies. [Learn more](#) ([/DianaTools/index.php?r=site/terms](#)).

I accept



|                       |                  |                                                                                      |                                                                                                                                                                                                                                                                                                                                                                                                           |
|-----------------------|------------------|--------------------------------------------------------------------------------------|-----------------------------------------------------------------------------------------------------------------------------------------------------------------------------------------------------------------------------------------------------------------------------------------------------------------------------------------------------------------------------------------------------------|
| Cbln3 (mmu) ⓘ         | mmu-miR-27a-3p ⓘ |    | <a href="#">0.513</a><br><a href="(/DianaTools/index.php?r=microT_CDS/results&amp;keywords=mmu-miR-27a-3p%20ENSMUSG00000040380&amp;genes=ENSMUSG00000040380&amp;mirnas=mmu-miR-27a-3p&amp;threshold=0)">(/DianaTools/index.php?<br/>r=microT_CDS/results&amp;keywords=mmu-<br/>miR-27a-<br/>3p%20ENSMUSG00000040380&amp;genes=ENSMUSG00000040380&amp;mirnas=mmu-<br/>miR-27a-<br/>3p&amp;threshold=0)</a> |
| Abcg5 (mmu) ⓘ         | mmu-miR-27a-3p ⓘ |    | <a href="#">0.510</a><br><a href="(/DianaTools/index.php?r=microT_CDS/results&amp;keywords=mmu-miR-27a-3p%20ENSMUSG00000040505&amp;genes=ENSMUSG00000040505&amp;mirnas=mmu-miR-27a-3p&amp;threshold=0)">(/DianaTools/index.php?<br/>r=microT_CDS/results&amp;keywords=mmu-<br/>miR-27a-<br/>3p%20ENSMUSG00000040505&amp;genes=ENSMUSG00000040505&amp;mirnas=mmu-<br/>miR-27a-<br/>3p&amp;threshold=0)</a> |
| Fam117b (mmu) ⓘ       | mmu-miR-27a-3p ⓘ |    | <a href="#">0.503</a><br><a href="(/DianaTools/index.php?r=microT_CDS/results&amp;keywords=mmu-miR-27a-3p%20ENSMUSG00000041040&amp;genes=ENSMUSG00000041040&amp;mirnas=mmu-miR-27a-3p&amp;threshold=0)">(/DianaTools/index.php?<br/>r=microT_CDS/results&amp;keywords=mmu-<br/>miR-27a-<br/>3p%20ENSMUSG00000041040&amp;genes=ENSMUSG00000041040&amp;mirnas=mmu-<br/>miR-27a-<br/>3p&amp;threshold=0)</a> |
| 9130011E15Rik (mmu) ⓘ | mmu-miR-27a-3p ⓘ |    | <a href="#">0.494</a><br><a href="(/DianaTools/index.php?r=microT_CDS/results&amp;keywords=mmu-miR-27a-3p%20ENSMUSG00000039901&amp;genes=ENSMUSG00000039901&amp;mirnas=mmu-miR-27a-3p&amp;threshold=0)">(/DianaTools/index.php?<br/>r=microT_CDS/results&amp;keywords=mmu-<br/>miR-27a-<br/>3p%20ENSMUSG00000039901&amp;genes=ENSMUSG00000039901&amp;mirnas=mmu-<br/>miR-27a-<br/>3p&amp;threshold=0)</a> |
| 9130011E15Rik (mmu) ⓘ | mmu-miR-27a-3p ⓘ |    | <a href="#">0.494</a><br><a href="(/DianaTools/index.php?r=microT_CDS/results&amp;keywords=mmu-miR-27a-3p%20ENSMUSG00000039901&amp;genes=ENSMUSG00000039901&amp;mirnas=mmu-miR-27a-3p&amp;threshold=0)">(/DianaTools/index.php?<br/>r=microT_CDS/results&amp;keywords=mmu-<br/>miR-27a-<br/>3p%20ENSMUSG00000039901&amp;genes=ENSMUSG00000039901&amp;mirnas=mmu-<br/>miR-27a-<br/>3p&amp;threshold=0)</a> |
| Car8 (mmu) ⓘ          | mmu-miR-27a-3p ⓘ |    | <a href="#">0.484</a><br><a href="(/DianaTools/index.php?r=microT_CDS/results&amp;keywords=mmu-miR-27a-3p%20ENSMUSG00000041261&amp;genes=ENSMUSG00000041261&amp;mirnas=mmu-miR-27a-3p&amp;threshold=0)">(/DianaTools/index.php?<br/>r=microT_CDS/results&amp;keywords=mmu-<br/>miR-27a-<br/>3p%20ENSMUSG00000041261&amp;genes=ENSMUSG00000041261&amp;mirnas=mmu-<br/>miR-27a-<br/>3p&amp;threshold=0)</a> |
| Car8 (mmu) ⓘ          | mmu-miR-27a-3p ⓘ |    | <a href="#">0.484</a><br><a href="(/DianaTools/index.php?r=microT_CDS/results&amp;keywords=mmu-miR-27a-3p%20ENSMUSG00000041261&amp;genes=ENSMUSG00000041261&amp;mirnas=mmu-miR-27a-3p&amp;threshold=0)">(/DianaTools/index.php?<br/>r=microT_CDS/results&amp;keywords=mmu-<br/>miR-27a-<br/>3p%20ENSMUSG00000041261&amp;genes=ENSMUSG00000041261&amp;mirnas=mmu-<br/>miR-27a-<br/>3p&amp;threshold=0)</a> |
| Ypel5 (mmu) ⓘ         | mmu-miR-27a-3p ⓘ |  | <a href="#">0.472</a><br><a href="(/DianaTools/index.php?r=microT_CDS/results&amp;keywords=mmu-miR-27a-3p%20ENSMUSG00000039770&amp;genes=ENSMUSG00000039770&amp;mirnas=mmu-miR-27a-3p&amp;threshold=0)">(/DianaTools/index.php?<br/>r=microT_CDS/results&amp;keywords=mmu-<br/>miR-27a-<br/>3p%20ENSMUSG00000039770&amp;genes=ENSMUSG00000039770&amp;mirnas=mmu-<br/>miR-27a-<br/>3p&amp;threshold=0)</a> |
| Ghitm (mmu) ⓘ         | mmu-miR-27a-3p ⓘ |  | <a href="#">0.465</a><br><a href="(/DianaTools/index.php?r=microT_CDS/results&amp;keywords=mmu-miR-27a-3p%20ENSMUSG00000041028&amp;genes=ENSMUSG00000041028&amp;mirnas=mmu-miR-27a-3p&amp;threshold=0)">(/DianaTools/index.php?<br/>r=microT_CDS/results&amp;keywords=mmu-<br/>miR-27a-<br/>3p%20ENSMUSG00000041028&amp;genes=ENSMUSG00000041028&amp;mirnas=mmu-<br/>miR-27a-<br/>3p&amp;threshold=0)</a> |
| Nploc4 (mmu) ⓘ        | mmu-miR-27a-3p ⓘ |  | <a href="#">0.463</a><br><a href="(/DianaTools/index.php?r=microT_CDS/results&amp;keywords=mmu-miR-27a-3p%20ENSMUSG00000039703&amp;genes=ENSMUSG00000039703&amp;mirnas=mmu-miR-27a-3p&amp;threshold=0)">(/DianaTools/index.php?<br/>r=microT_CDS/results&amp;keywords=mmu-<br/>miR-27a-<br/>3p%20ENSMUSG00000039703&amp;genes=ENSMUSG00000039703&amp;mirnas=mmu-<br/>miR-27a-<br/>3p&amp;threshold=0)</a> |
| Mrps35 (mmu) ⓘ        | mmu-miR-27a-3p ⓘ |  | <a href="#">0.462</a><br><a href="(/DianaTools/index.php?r=microT_CDS/results&amp;keywords=mmu-miR-27a-3p%20ENSMUSG00000040112&amp;genes=ENSMUSG00000040112&amp;mirnas=mmu-miR-27a-3p&amp;threshold=0)">(/DianaTools/index.php?<br/>r=microT_CDS/results&amp;keywords=mmu-<br/>miR-27a-<br/>3p%20ENSMUSG00000040112&amp;genes=ENSMUSG00000040112&amp;mirnas=mmu-<br/>miR-27a-<br/>3p&amp;threshold=0)</a> |

We have placed cookies on your device to help make this website and the services we offer better. By using this site, you agree to the use of cookies. [Learn more](#) ([/DianaTools/index.php?r=site/terms]((/DianaTools/index.php?r=site/terms))).

I accept

|                  |                  |                                                                                      |                                                                                                                                                                                            |
|------------------|------------------|--------------------------------------------------------------------------------------|--------------------------------------------------------------------------------------------------------------------------------------------------------------------------------------------|
| App1 (mmu) ⓘ     | mmu-miR-27a-3p ⓘ |    | <a href="#">0.459 (/DianaTools/index.php?r=microT_CDS/results&amp;keywords=mmu-miR-27a-3p%20ENSMUSG00000040760&amp;genes=ENSMUSG00000040760&amp;mirnas=mmu-miR-27a-3p&amp;threshold=0)</a> |
| Saa4 (mmu) ⓘ     | mmu-miR-27a-3p ⓘ |    | <a href="#">0.455 (/DianaTools/index.php?r=microT_CDS/results&amp;keywords=mmu-miR-27a-3p%20ENSMUSG00000040017&amp;genes=ENSMUSG00000040017&amp;mirnas=mmu-miR-27a-3p&amp;threshold=0)</a> |
| Irgq (mmu) ⓘ     | mmu-miR-27a-3p ⓘ |    | <a href="#">0.454 (/DianaTools/index.php?r=microT_CDS/results&amp;keywords=mmu-miR-27a-3p%20ENSMUSG00000041037&amp;genes=ENSMUSG00000041037&amp;mirnas=mmu-miR-27a-3p&amp;threshold=0)</a> |
| Alkbh4 (mmu) ⓘ   | mmu-miR-27a-3p ⓘ |    | -                                                                                                                                                                                          |
| S100pbp (mmu) ⓘ  | mmu-miR-27a-3p ⓘ |    | -                                                                                                                                                                                          |
| Skiv2l (mmu) ⓘ   | mmu-miR-27a-3p ⓘ |    | -                                                                                                                                                                                          |
| Ptger4 (mmu) ⓘ   | mmu-miR-27a-3p ⓘ |    | -                                                                                                                                                                                          |
| Mdfic (mmu) ⓘ    | mmu-miR-27a-3p ⓘ |    | -                                                                                                                                                                                          |
| Baz2a (mmu) ⓘ    | mmu-miR-27a-3p ⓘ |    | -                                                                                                                                                                                          |
| Zmym5 (mmu) ⓘ    | mmu-miR-27a-3p ⓘ |    | -                                                                                                                                                                                          |
| Lrp1 (mmu) ⓘ     | mmu-miR-27a-3p ⓘ |    | -                                                                                                                                                                                          |
| Cpeb2 (mmu) ⓘ    | mmu-miR-27a-3p ⓘ |    | -                                                                                                                                                                                          |
| Bptf (mmu) ⓘ     | mmu-miR-27a-3p ⓘ |    | -                                                                                                                                                                                          |
| Ttc3 (mmu) ⓘ     | mmu-miR-27a-3p ⓘ |    | -                                                                                                                                                                                          |
| Ino80d (mmu) ⓘ   | mmu-miR-27a-3p ⓘ |    | -                                                                                                                                                                                          |
| Elmo1 (mmu) ⓘ    | mmu-miR-27a-3p ⓘ |   | -                                                                                                                                                                                          |
| Zfp597 (mmu) ⓘ   | mmu-miR-27a-3p ⓘ |  | -                                                                                                                                                                                          |
| BC055324 (mmu) ⓘ | mmu-miR-27a-3p ⓘ |  | -                                                                                                                                                                                          |
| BC055324 (mmu) ⓘ | mmu-miR-27a-3p ⓘ |  | -                                                                                                                                                                                          |
| BC018242 (mmu) ⓘ | mmu-miR-27a-3p ⓘ |  | -                                                                                                                                                                                          |
| Ppp1ca (mmu) ⓘ   | mmu-miR-27a-3p ⓘ |  | -                                                                                                                                                                                          |
| Rere (mmu) ⓘ     | mmu-miR-27a-3p ⓘ |  | -                                                                                                                                                                                          |
| Scamp2 (mmu) ⓘ   | mmu-miR-27a-3p ⓘ |  | -                                                                                                                                                                                          |
| Wdr7 (mmu) ⓘ     | mmu-miR-27a-3p ⓘ |  | -                                                                                                                                                                                          |
| Gramd1b (mmu) ⓘ  | mmu-miR-27a-3p ⓘ |  | -                                                                                                                                                                                          |
| Nrg3 (mmu) ⓘ     | mmu-miR-27a-3p ⓘ |  | -                                                                                                                                                                                          |

We have placed cookies on your device to help make this website and the services we offer better. By using this site, you agree to the use of cookies. [Learn more \(/DianaTools/index.php?r=site/terms\)](#)

I accept

|                     |                  |                                                                                      |                                                                                                                                                                                                                                                                                                                                                                           |
|---------------------|------------------|--------------------------------------------------------------------------------------|---------------------------------------------------------------------------------------------------------------------------------------------------------------------------------------------------------------------------------------------------------------------------------------------------------------------------------------------------------------------------|
| Tex2 (mmu) ⓘ        | mmu-miR-27a-3p ⓘ |     | -                                                                                                                                                                                                                                                                                                                                                                         |
| Cacna2d1 (mmu) ⓘ    | mmu-miR-27a-3p ⓘ |    | -                                                                                                                                                                                                                                                                                                                                                                         |
| Igsf21 (mmu) ⓘ      | mmu-miR-27a-3p ⓘ |    | -                                                                                                                                                                                                                                                                                                                                                                         |
| Lrp1 (mmu) ⓘ        | mmu-miR-27a-3p ⓘ |    | -                                                                                                                                                                                                                                                                                                                                                                         |
| Nhs1 (mmu) ⓘ        | mmu-miR-27a-3p ⓘ |    | -                                                                                                                                                                                                                                                                                                                                                                         |
| Hs2st1 (mmu) ⓘ      | mmu-miR-27a-3p ⓘ |    | -                                                                                                                                                                                                                                                                                                                                                                         |
| Kcna2 (mmu) ⓘ       | mmu-miR-27a-3p ⓘ |    | -                                                                                                                                                                                                                                                                                                                                                                         |
| Dnajc16 (mmu) ⓘ     | mmu-miR-27a-3p ⓘ |    | -                                                                                                                                                                                                                                                                                                                                                                         |
| Zfp292 (mmu) ⓘ      | mmu-miR-27a-3p ⓘ |    | -                                                                                                                                                                                                                                                                                                                                                                         |
| Arhgap29 (mmu) ⓘ    | mmu-miR-27a-3p ⓘ |    | -                                                                                                                                                                                                                                                                                                                                                                         |
| Gabbr2 (mmu) ⓘ      | mmu-miR-27a-3p ⓘ |    | -                                                                                                                                                                                                                                                                                                                                                                         |
| Alg2 (mmu) ⓘ        | mmu-miR-27a-3p ⓘ |    | -                                                                                                                                                                                                                                                                                                                                                                         |
| Igsf23 (mmu) ⓘ      | mmu-miR-27a-3p ⓘ |    | -                                                                                                                                                                                                                                                                                                                                                                         |
| Atp1b2 (mmu) ⓘ      | mmu-miR-27a-3p ⓘ |    | -                                                                                                                                                                                                                                                                                                                                                                         |
| D19Bwg1357e (mmu) ⓘ | mmu-miR-27a-3p ⓘ |    | -                                                                                                                                                                                                                                                                                                                                                                         |
| Stat2 (mmu) ⓘ       | mmu-miR-27a-3p ⓘ |    | -                                                                                                                                                                                                                                                                                                                                                                         |
| Aqp11 (mmu) ⓘ       | mmu-miR-27a-3p ⓘ |    | <p>0.999<br/> <a href="(/DianaTools/index.php?r=microT_CDS/results&amp;keywords=mmu-miR-27a-3p%20ENSMUSG00000042797&amp;genes=ENSMUSG00000042797&amp;mirnas=mmu-miR-27a-3p&amp;threshold=0)">(/DianaTools/index.php?r=microT_CDS/results&amp;keywords=mmu-miR-27a-3p%20ENSMUSG00000042797&amp;genes=ENSMUSG00000042797&amp;mirnas=mmu-miR-27a-3p&amp;threshold=0)</a></p> |
| Ssh1 (mmu) ⓘ        | mmu-miR-27a-3p ⓘ |  | <p>0.999<br/> <a href="(/DianaTools/index.php?r=microT_CDS/results&amp;keywords=mmu-miR-27a-3p%20ENSMUSG00000042121&amp;genes=ENSMUSG00000042121&amp;mirnas=mmu-miR-27a-3p&amp;threshold=0)">(/DianaTools/index.php?r=microT_CDS/results&amp;keywords=mmu-miR-27a-3p%20ENSMUSG00000042121&amp;genes=ENSMUSG00000042121&amp;mirnas=mmu-miR-27a-3p&amp;threshold=0)</a></p> |
| Sowaha (mmu) ⓘ      | mmu-miR-27a-3p ⓘ |  | <p>0.996<br/> <a href="(/DianaTools/index.php?r=microT_CDS/results&amp;keywords=mmu-miR-27a-3p%20ENSMUSG00000044352&amp;genes=ENSMUSG00000044352&amp;mirnas=mmu-miR-27a-3p&amp;threshold=0)">(/DianaTools/index.php?r=microT_CDS/results&amp;keywords=mmu-miR-27a-3p%20ENSMUSG00000044352&amp;genes=ENSMUSG00000044352&amp;mirnas=mmu-miR-27a-3p&amp;threshold=0)</a></p> |
| Tril (mmu) ⓘ        | mmu-miR-27a-3p ⓘ |  | <p>0.990<br/> <a href="(/DianaTools/index.php?r=microT_CDS/results&amp;keywords=mmu-miR-27a-3p%20ENSMUSG00000043496&amp;genes=ENSMUSG00000043496&amp;mirnas=mmu-miR-27a-3p&amp;threshold=0)">(/DianaTools/index.php?r=microT_CDS/results&amp;keywords=mmu-miR-27a-3p%20ENSMUSG00000043496&amp;genes=ENSMUSG00000043496&amp;mirnas=mmu-miR-27a-3p&amp;threshold=0)</a></p> |
| Pura (mmu) ⓘ        | mmu-miR-27a-3p ⓘ |  | <p>0.985<br/> <a href="(/DianaTools/index.php?r=microT_CDS/results&amp;keywords=mmu-miR-27a-3p%20ENSMUSG00000043991&amp;genes=ENSMUSG00000043991&amp;mirnas=mmu-miR-27a-3p&amp;threshold=0)">(/DianaTools/index.php?r=microT_CDS/results&amp;keywords=mmu-miR-27a-3p%20ENSMUSG00000043991&amp;genes=ENSMUSG00000043991&amp;mirnas=mmu-miR-27a-3p&amp;threshold=0)</a></p> |

We have placed cookies on your device to help make this website and the services we offer better. By using this site, you agree to the use of cookies. [Learn more](#) ([/DianaTools/index.php?r=site/terms]((/DianaTools/index.php?r=site/terms))).

I accept

|                 |                  |                                                                                      |                                                                                                                                                                                                                                                                                                                                                                                           |
|-----------------|------------------|--------------------------------------------------------------------------------------|-------------------------------------------------------------------------------------------------------------------------------------------------------------------------------------------------------------------------------------------------------------------------------------------------------------------------------------------------------------------------------------------|
| Pura (mmu) ⓘ    | mmu-miR-27a-3p ⓘ |    | 0.985<br><a href="(/DianaTools/index.php?r=microT_CDS/results&amp;keywords=mmu-miR-27a-3p%20ENSMUSG00000043991&amp;genes=ENSMUSG00000043991&amp;mirnas=mmu-miR-27a-3p&amp;threshold=0)">(/DianaTools/index.php?<br/>r=microT_CDS/results&amp;keywords=mmu-<br/>miR-27a-<br/>3p%20ENSMUSG00000043991&amp;genes=ENSMUSG00000043991&amp;mirnas=mmu-<br/>miR-27a-<br/>3p&amp;threshold=0)</a> |
| Ypel3 (mmu) ⓘ   | mmu-miR-27a-3p ⓘ |    | 0.985<br><a href="(/DianaTools/index.php?r=microT_CDS/results&amp;keywords=mmu-miR-27a-3p%20ENSMUSG00000042675&amp;genes=ENSMUSG00000042675&amp;mirnas=mmu-miR-27a-3p&amp;threshold=0)">(/DianaTools/index.php?<br/>r=microT_CDS/results&amp;keywords=mmu-<br/>miR-27a-<br/>3p%20ENSMUSG00000042675&amp;genes=ENSMUSG00000042675&amp;mirnas=mmu-<br/>miR-27a-<br/>3p&amp;threshold=0)</a> |
| Ypel3 (mmu) ⓘ   | mmu-miR-27a-3p ⓘ |    | 0.985<br><a href="(/DianaTools/index.php?r=microT_CDS/results&amp;keywords=mmu-miR-27a-3p%20ENSMUSG00000042675&amp;genes=ENSMUSG00000042675&amp;mirnas=mmu-miR-27a-3p&amp;threshold=0)">(/DianaTools/index.php?<br/>r=microT_CDS/results&amp;keywords=mmu-<br/>miR-27a-<br/>3p%20ENSMUSG00000042675&amp;genes=ENSMUSG00000042675&amp;mirnas=mmu-<br/>miR-27a-<br/>3p&amp;threshold=0)</a> |
| Rgs8 (mmu) ⓘ    | mmu-miR-27a-3p ⓘ |    | 0.962<br><a href="(/DianaTools/index.php?r=microT_CDS/results&amp;keywords=mmu-miR-27a-3p%20ENSMUSG00000042671&amp;genes=ENSMUSG00000042671&amp;mirnas=mmu-miR-27a-3p&amp;threshold=0)">(/DianaTools/index.php?<br/>r=microT_CDS/results&amp;keywords=mmu-<br/>miR-27a-<br/>3p%20ENSMUSG00000042671&amp;genes=ENSMUSG00000042671&amp;mirnas=mmu-<br/>miR-27a-<br/>3p&amp;threshold=0)</a> |
| Edem3 (mmu) ⓘ   | mmu-miR-27a-3p ⓘ |    | 0.960<br><a href="(/DianaTools/index.php?r=microT_CDS/results&amp;keywords=mmu-miR-27a-3p%20ENSMUSG00000043019&amp;genes=ENSMUSG00000043019&amp;mirnas=mmu-miR-27a-3p&amp;threshold=0)">(/DianaTools/index.php?<br/>r=microT_CDS/results&amp;keywords=mmu-<br/>miR-27a-<br/>3p%20ENSMUSG00000043019&amp;genes=ENSMUSG00000043019&amp;mirnas=mmu-<br/>miR-27a-<br/>3p&amp;threshold=0)</a> |
| Elfn2 (mmu) ⓘ   | mmu-miR-27a-3p ⓘ |    | 0.943<br><a href="(/DianaTools/index.php?r=microT_CDS/results&amp;keywords=mmu-miR-27a-3p%20ENSMUSG00000043460&amp;genes=ENSMUSG00000043460&amp;mirnas=mmu-miR-27a-3p&amp;threshold=0)">(/DianaTools/index.php?<br/>r=microT_CDS/results&amp;keywords=mmu-<br/>miR-27a-<br/>3p%20ENSMUSG00000043460&amp;genes=ENSMUSG00000043460&amp;mirnas=mmu-<br/>miR-27a-<br/>3p&amp;threshold=0)</a> |
| Fam63b (mmu) ⓘ  | mmu-miR-27a-3p ⓘ |    | 0.891<br><a href="(/DianaTools/index.php?r=microT_CDS/results&amp;keywords=mmu-miR-27a-3p%20ENSMUSG00000042444&amp;genes=ENSMUSG00000042444&amp;mirnas=mmu-miR-27a-3p&amp;threshold=0)">(/DianaTools/index.php?<br/>r=microT_CDS/results&amp;keywords=mmu-<br/>miR-27a-<br/>3p%20ENSMUSG00000042444&amp;genes=ENSMUSG00000042444&amp;mirnas=mmu-<br/>miR-27a-<br/>3p&amp;threshold=0)</a> |
| Fam63b (mmu) ⓘ  | mmu-miR-27a-3p ⓘ |  | 0.891<br><a href="(/DianaTools/index.php?r=microT_CDS/results&amp;keywords=mmu-miR-27a-3p%20ENSMUSG00000042444&amp;genes=ENSMUSG00000042444&amp;mirnas=mmu-miR-27a-3p&amp;threshold=0)">(/DianaTools/index.php?<br/>r=microT_CDS/results&amp;keywords=mmu-<br/>miR-27a-<br/>3p%20ENSMUSG00000042444&amp;genes=ENSMUSG00000042444&amp;mirnas=mmu-<br/>miR-27a-<br/>3p&amp;threshold=0)</a> |
| C1galt1 (mmu) ⓘ | mmu-miR-27a-3p ⓘ |  | 0.884<br><a href="(/DianaTools/index.php?r=microT_CDS/results&amp;keywords=mmu-miR-27a-3p%20ENSMUSG00000042460&amp;genes=ENSMUSG00000042460&amp;mirnas=mmu-miR-27a-3p&amp;threshold=0)">(/DianaTools/index.php?<br/>r=microT_CDS/results&amp;keywords=mmu-<br/>miR-27a-<br/>3p%20ENSMUSG00000042460&amp;genes=ENSMUSG00000042460&amp;mirnas=mmu-<br/>miR-27a-<br/>3p&amp;threshold=0)</a> |
| Jph1 (mmu) ⓘ    | mmu-miR-27a-3p ⓘ |  | 0.884<br><a href="(/DianaTools/index.php?r=microT_CDS/results&amp;keywords=mmu-miR-27a-3p%20ENSMUSG00000042686&amp;genes=ENSMUSG00000042686&amp;mirnas=mmu-miR-27a-3p&amp;threshold=0)">(/DianaTools/index.php?<br/>r=microT_CDS/results&amp;keywords=mmu-<br/>miR-27a-<br/>3p%20ENSMUSG00000042686&amp;genes=ENSMUSG00000042686&amp;mirnas=mmu-<br/>miR-27a-<br/>3p&amp;threshold=0)</a> |
| Slc36a4 (mmu) ⓘ | mmu-miR-27a-3p ⓘ |  | 0.865<br><a href="(/DianaTools/index.php?r=microT_CDS/results&amp;keywords=mmu-miR-27a-3p%20ENSMUSG00000043885&amp;genes=ENSMUSG00000043885&amp;mirnas=mmu-miR-27a-3p&amp;threshold=0)">(/DianaTools/index.php?<br/>r=microT_CDS/results&amp;keywords=mmu-<br/>miR-27a-<br/>3p%20ENSMUSG00000043885&amp;genes=ENSMUSG00000043885&amp;mirnas=mmu-<br/>miR-27a-<br/>3p&amp;threshold=0)</a> |

We have placed cookies on your device to help make this website and the services we offer better. By using this site, you agree to the use of cookies. [Learn more](#) ([\(/DianaTools/index.php?r=site/terms\)]((/DianaTools/index.php?r=site/terms))).

I accept

|                      |                  |                                                                                      |                                                                                                                                                                                   |
|----------------------|------------------|--------------------------------------------------------------------------------------|-----------------------------------------------------------------------------------------------------------------------------------------------------------------------------------|
| Setx (mmu) ⓘ         | mmu-miR-27a-3p ⓘ |    | 0.861<br>(/DianaTools/index.php?<br>r=microT_CDS/results&keywords=mmu-<br>miR-27a-<br>3p%20ENSMUSG00000043535&genes=ENSMUSG00000043535&mirnas=mmu-<br>miR-27a-<br>3p&threshold=0) |
| Snx18 (mmu) ⓘ        | mmu-miR-27a-3p ⓘ |    | 0.811<br>(/DianaTools/index.php?<br>r=microT_CDS/results&keywords=mmu-<br>miR-27a-<br>3p%20ENSMUSG00000042364&genes=ENSMUSG00000042364&mirnas=mmu-<br>miR-27a-<br>3p&threshold=0) |
| Snx18 (mmu) ⓘ        | mmu-miR-27a-3p ⓘ |    | 0.811<br>(/DianaTools/index.php?<br>r=microT_CDS/results&keywords=mmu-<br>miR-27a-<br>3p%20ENSMUSG00000042364&genes=ENSMUSG00000042364&mirnas=mmu-<br>miR-27a-<br>3p&threshold=0) |
| B63005N14Rik (mmu) ⓘ | mmu-miR-27a-3p ⓘ |    | 0.791<br>(/DianaTools/index.php?<br>r=microT_CDS/results&keywords=mmu-<br>miR-27a-<br>3p%20ENSMUSG00000042742&genes=ENSMUSG00000042742&mirnas=mmu-<br>miR-27a-<br>3p&threshold=0) |
| Tmem194b (mmu) ⓘ     | mmu-miR-27a-3p ⓘ |    | 0.788<br>(/DianaTools/index.php?<br>r=microT_CDS/results&keywords=mmu-<br>miR-27a-<br>3p%20ENSMUSG00000043015&genes=ENSMUSG00000043015&mirnas=mmu-<br>miR-27a-<br>3p&threshold=0) |
| Foxo1 (mmu) ⓘ        | mmu-miR-27a-3p ⓘ |    | 0.778<br>(/DianaTools/index.php?<br>r=microT_CDS/results&keywords=mmu-<br>miR-27a-<br>3p%20ENSMUSG00000044167&genes=ENSMUSG00000044167&mirnas=mmu-<br>miR-27a-<br>3p&threshold=0) |
| Foxo1 (mmu) ⓘ        | mmu-miR-27a-3p ⓘ |   | 0.778<br>(/DianaTools/index.php?<br>r=microT_CDS/results&keywords=mmu-<br>miR-27a-<br>3p%20ENSMUSG00000044167&genes=ENSMUSG00000044167&mirnas=mmu-<br>miR-27a-<br>3p&threshold=0) |
| Fam222a (mmu) ⓘ      | mmu-miR-27a-3p ⓘ |  | 0.769<br>(/DianaTools/index.php?<br>r=microT_CDS/results&keywords=mmu-<br>miR-27a-<br>3p%20ENSMUSG00000041930&genes=ENSMUSG00000041930&mirnas=mmu-<br>miR-27a-<br>3p&threshold=0) |
| Ncapg2 (mmu) ⓘ       | mmu-miR-27a-3p ⓘ |  | 0.767<br>(/DianaTools/index.php?<br>r=microT_CDS/results&keywords=mmu-<br>miR-27a-<br>3p%20ENSMUSG00000042029&genes=ENSMUSG00000042029&mirnas=mmu-<br>miR-27a-<br>3p&threshold=0) |
| Kdm7a (mmu) ⓘ        | mmu-miR-27a-3p ⓘ |  | 0.759<br>(/DianaTools/index.php?<br>r=microT_CDS/results&keywords=mmu-<br>miR-27a-<br>3p%20ENSMUSG00000042599&genes=ENSMUSG00000042599&mirnas=mmu-<br>miR-27a-<br>3p&threshold=0) |
| Stk40 (mmu) ⓘ        | mmu-miR-27a-3p ⓘ |  | 0.748<br>(/DianaTools/index.php?<br>r=microT_CDS/results&keywords=mmu-<br>miR-27a-<br>3p%20ENSMUSG00000042608&genes=ENSMUSG00000042608&mirnas=mmu-<br>miR-27a-<br>3p&threshold=0) |

We have placed cookies on your device to help make this website and the services we offer better. By using this site, you agree to the use of cookies. [Learn more](#) (</DianaTools/index.php?r=site/terms>).

I accept

|                |                  |                                                                                      |                                                                                                                                                                                                                                                                                                                                                                                           |
|----------------|------------------|--------------------------------------------------------------------------------------|-------------------------------------------------------------------------------------------------------------------------------------------------------------------------------------------------------------------------------------------------------------------------------------------------------------------------------------------------------------------------------------------|
| Dpy193 (mmu) ⓘ | mmu-miR-27a-3p ⓘ |    | 0.745<br><a href="(/DianaTools/index.php?r=microT_CDS/results&amp;keywords=mmu-miR-27a-3p%20ENSMUSG00000043671&amp;genes=ENSMUSG00000043671&amp;mirnas=mmu-miR-27a-3p&amp;threshold=0)">(/DianaTools/index.php?<br/>r=microT_CDS/results&amp;keywords=mmu-<br/>miR-27a-<br/>3p%20ENSMUSG00000043671&amp;genes=ENSMUSG00000043671&amp;mirnas=mmu-<br/>miR-27a-<br/>3p&amp;threshold=0)</a> |
| Wapal (mmu) ⓘ  | mmu-miR-27a-3p ⓘ |    | 0.743<br><a href="(/DianaTools/index.php?r=microT_CDS/results&amp;keywords=mmu-miR-27a-3p%20ENSMUSG00000041408&amp;genes=ENSMUSG00000041408&amp;mirnas=mmu-miR-27a-3p&amp;threshold=0)">(/DianaTools/index.php?<br/>r=microT_CDS/results&amp;keywords=mmu-<br/>miR-27a-<br/>3p%20ENSMUSG00000041408&amp;genes=ENSMUSG00000041408&amp;mirnas=mmu-<br/>miR-27a-<br/>3p&amp;threshold=0)</a> |
| Zmym4 (mmu) ⓘ  | mmu-miR-27a-3p ⓘ |    | 0.743<br><a href="(/DianaTools/index.php?r=microT_CDS/results&amp;keywords=mmu-miR-27a-3p%20ENSMUSG00000042446&amp;genes=ENSMUSG00000042446&amp;mirnas=mmu-miR-27a-3p&amp;threshold=0)">(/DianaTools/index.php?<br/>r=microT_CDS/results&amp;keywords=mmu-<br/>miR-27a-<br/>3p%20ENSMUSG00000042446&amp;genes=ENSMUSG00000042446&amp;mirnas=mmu-<br/>miR-27a-<br/>3p&amp;threshold=0)</a> |
| Dicer1 (mmu) ⓘ | mmu-miR-27a-3p ⓘ |    | 0.738<br><a href="(/DianaTools/index.php?r=microT_CDS/results&amp;keywords=mmu-miR-27a-3p%20ENSMUSG00000041415&amp;genes=ENSMUSG00000041415&amp;mirnas=mmu-miR-27a-3p&amp;threshold=0)">(/DianaTools/index.php?<br/>r=microT_CDS/results&amp;keywords=mmu-<br/>miR-27a-<br/>3p%20ENSMUSG00000041415&amp;genes=ENSMUSG00000041415&amp;mirnas=mmu-<br/>miR-27a-<br/>3p&amp;threshold=0)</a> |
| Dicer1 (mmu) ⓘ | mmu-miR-27a-3p ⓘ |    | 0.738<br><a href="(/DianaTools/index.php?r=microT_CDS/results&amp;keywords=mmu-miR-27a-3p%20ENSMUSG00000041415&amp;genes=ENSMUSG00000041415&amp;mirnas=mmu-miR-27a-3p&amp;threshold=0)">(/DianaTools/index.php?<br/>r=microT_CDS/results&amp;keywords=mmu-<br/>miR-27a-<br/>3p%20ENSMUSG00000041415&amp;genes=ENSMUSG00000041415&amp;mirnas=mmu-<br/>miR-27a-<br/>3p&amp;threshold=0)</a> |
| Wdr11 (mmu) ⓘ  | mmu-miR-27a-3p ⓘ |    | 0.723<br><a href="(/DianaTools/index.php?r=microT_CDS/results&amp;keywords=mmu-miR-27a-3p%20ENSMUSG00000042055&amp;genes=ENSMUSG00000042055&amp;mirnas=mmu-miR-27a-3p&amp;threshold=0)">(/DianaTools/index.php?<br/>r=microT_CDS/results&amp;keywords=mmu-<br/>miR-27a-<br/>3p%20ENSMUSG00000042055&amp;genes=ENSMUSG00000042055&amp;mirnas=mmu-<br/>miR-27a-<br/>3p&amp;threshold=0)</a> |
| Wdr11 (mmu) ⓘ  | mmu-miR-27a-3p ⓘ |    | 0.723<br><a href="(/DianaTools/index.php?r=microT_CDS/results&amp;keywords=mmu-miR-27a-3p%20ENSMUSG00000042055&amp;genes=ENSMUSG00000042055&amp;mirnas=mmu-miR-27a-3p&amp;threshold=0)">(/DianaTools/index.php?<br/>r=microT_CDS/results&amp;keywords=mmu-<br/>miR-27a-<br/>3p%20ENSMUSG00000042055&amp;genes=ENSMUSG00000042055&amp;mirnas=mmu-<br/>miR-27a-<br/>3p&amp;threshold=0)</a> |
| Tardbp (mmu) ⓘ | mmu-miR-27a-3p ⓘ |  | 0.712<br><a href="(/DianaTools/index.php?r=microT_CDS/results&amp;keywords=mmu-miR-27a-3p%20ENSMUSG00000041459&amp;genes=ENSMUSG00000041459&amp;mirnas=mmu-miR-27a-3p&amp;threshold=0)">(/DianaTools/index.php?<br/>r=microT_CDS/results&amp;keywords=mmu-<br/>miR-27a-<br/>3p%20ENSMUSG00000041459&amp;genes=ENSMUSG00000041459&amp;mirnas=mmu-<br/>miR-27a-<br/>3p&amp;threshold=0)</a> |
| Map3k9 (mmu) ⓘ | mmu-miR-27a-3p ⓘ |  | 0.711<br><a href="(/DianaTools/index.php?r=microT_CDS/results&amp;keywords=mmu-miR-27a-3p%20ENSMUSG00000042724&amp;genes=ENSMUSG00000042724&amp;mirnas=mmu-miR-27a-3p&amp;threshold=0)">(/DianaTools/index.php?<br/>r=microT_CDS/results&amp;keywords=mmu-<br/>miR-27a-<br/>3p%20ENSMUSG00000042724&amp;genes=ENSMUSG00000042724&amp;mirnas=mmu-<br/>miR-27a-<br/>3p&amp;threshold=0)</a> |
| Wdfy3 (mmu) ⓘ  | mmu-miR-27a-3p ⓘ |  | 0.699<br><a href="(/DianaTools/index.php?r=microT_CDS/results&amp;keywords=mmu-miR-27a-3p%20ENSMUSG00000043940&amp;genes=ENSMUSG00000043940&amp;mirnas=mmu-miR-27a-3p&amp;threshold=0)">(/DianaTools/index.php?<br/>r=microT_CDS/results&amp;keywords=mmu-<br/>miR-27a-<br/>3p%20ENSMUSG00000043940&amp;genes=ENSMUSG00000043940&amp;mirnas=mmu-<br/>miR-27a-<br/>3p&amp;threshold=0)</a> |
| Diras1 (mmu) ⓘ | mmu-miR-27a-3p ⓘ |  | 0.695<br><a href="(/DianaTools/index.php?r=microT_CDS/results&amp;keywords=mmu-miR-27a-3p%20ENSMUSG00000043670&amp;genes=ENSMUSG00000043670&amp;mirnas=mmu-miR-27a-3p&amp;threshold=0)">(/DianaTools/index.php?<br/>r=microT_CDS/results&amp;keywords=mmu-<br/>miR-27a-<br/>3p%20ENSMUSG00000043670&amp;genes=ENSMUSG00000043670&amp;mirnas=mmu-<br/>miR-27a-<br/>3p&amp;threshold=0)</a> |

We have placed cookies on your device to help make this website and the services we offer better. By using this site, you agree to the use of cookies. [Learn more]((/DianaTools/index.php?r=site/terms)) ([/DianaTools/index.php?r=site/terms]((/DianaTools/index.php?r=site/terms))).

I accept

|                   |                  |                                                                                      |                                                                                                                                                                                                                        |
|-------------------|------------------|--------------------------------------------------------------------------------------|------------------------------------------------------------------------------------------------------------------------------------------------------------------------------------------------------------------------|
| S1pr2 (mmu) ⓘ     | mmu-miR-27a-3p ⓘ |    | <p><a href="#">0.693</a><br/> <a href="#">(/DianaTools/index.php?r=microT_CDS/results&amp;keywords=mmu-miR-27a-3p%20ENSMUSG00000043895&amp;genes=ENSMUSG00000043895&amp;mirnas=mmu-miR-27a-3p&amp;threshold=0)</a></p> |
| Gpr146 (mmu) ⓘ    | mmu-miR-27a-3p ⓘ |    | <p><a href="#">0.677</a><br/> <a href="#">(/DianaTools/index.php?r=microT_CDS/results&amp;keywords=mmu-miR-27a-3p%20ENSMUSG00000044197&amp;genes=ENSMUSG00000044197&amp;mirnas=mmu-miR-27a-3p&amp;threshold=0)</a></p> |
| Arhgap32 (mmu) ⓘ  | mmu-miR-27a-3p ⓘ |    | <p><a href="#">0.660</a><br/> <a href="#">(/DianaTools/index.php?r=microT_CDS/results&amp;keywords=mmu-miR-27a-3p%20ENSMUSG00000041444&amp;genes=ENSMUSG00000041444&amp;mirnas=mmu-miR-27a-3p&amp;threshold=0)</a></p> |
| Hilpda (mmu) ⓘ    | mmu-miR-27a-3p ⓘ |    | <p><a href="#">0.619</a><br/> <a href="#">(/DianaTools/index.php?r=microT_CDS/results&amp;keywords=mmu-miR-27a-3p%20ENSMUSG00000043421&amp;genes=ENSMUSG00000043421&amp;mirnas=mmu-miR-27a-3p&amp;threshold=0)</a></p> |
| Mfsd6 (mmu) ⓘ     | mmu-miR-27a-3p ⓘ |    | <p><a href="#">0.610</a><br/> <a href="#">(/DianaTools/index.php?r=microT_CDS/results&amp;keywords=mmu-miR-27a-3p%20ENSMUSG00000041439&amp;genes=ENSMUSG00000041439&amp;mirnas=mmu-miR-27a-3p&amp;threshold=0)</a></p> |
| Elmsan1 (mmu) ⓘ   | mmu-miR-27a-3p ⓘ |    | <p><a href="#">0.586</a><br/> <a href="#">(/DianaTools/index.php?r=microT_CDS/results&amp;keywords=mmu-miR-27a-3p%20ENSMUSG00000042507&amp;genes=ENSMUSG00000042507&amp;mirnas=mmu-miR-27a-3p&amp;threshold=0)</a></p> |
| Elmsan1 (mmu) ⓘ   | mmu-miR-27a-3p ⓘ |   | <p><a href="#">0.586</a><br/> <a href="#">(/DianaTools/index.php?r=microT_CDS/results&amp;keywords=mmu-miR-27a-3p%20ENSMUSG00000042507&amp;genes=ENSMUSG00000042507&amp;mirnas=mmu-miR-27a-3p&amp;threshold=0)</a></p> |
| Gk5 (mmu) ⓘ       | mmu-miR-27a-3p ⓘ |  | <p><a href="#">0.578</a><br/> <a href="#">(/DianaTools/index.php?r=microT_CDS/results&amp;keywords=mmu-miR-27a-3p%20ENSMUSG00000041440&amp;genes=ENSMUSG00000041440&amp;mirnas=mmu-miR-27a-3p&amp;threshold=0)</a></p> |
| Ube2q1 (mmu) ⓘ    | mmu-miR-27a-3p ⓘ |  | <p><a href="#">0.566</a><br/> <a href="#">(/DianaTools/index.php?r=microT_CDS/results&amp;keywords=mmu-miR-27a-3p%20ENSMUSG00000042572&amp;genes=ENSMUSG00000042572&amp;mirnas=mmu-miR-27a-3p&amp;threshold=0)</a></p> |
| Tmem18 (mmu) ⓘ    | mmu-miR-27a-3p ⓘ |  | <p><a href="#">0.561</a><br/> <a href="#">(/DianaTools/index.php?r=microT_CDS/results&amp;keywords=mmu-miR-27a-3p%20ENSMUSG00000043061&amp;genes=ENSMUSG00000043061&amp;mirnas=mmu-miR-27a-3p&amp;threshold=0)</a></p> |
| Serpinb6b (mmu) ⓘ | mmu-miR-27a-3p ⓘ |  | <p><a href="#">0.548</a><br/> <a href="#">(/DianaTools/index.php?r=microT_CDS/results&amp;keywords=mmu-miR-27a-3p%20ENSMUSG00000042842&amp;genes=ENSMUSG00000042842&amp;mirnas=mmu-miR-27a-3p&amp;threshold=0)</a></p> |

We have placed cookies on your device to help make this website and the services we offer better. By using this site, you agree to the use of cookies. [Learn more](#) ([/DianaTools/index.php?r=site/terms](#)).

I accept

|                  |                  |                                                                                      |                                                                                                                                                                                                                                                                                                                                                                                           |
|------------------|------------------|--------------------------------------------------------------------------------------|-------------------------------------------------------------------------------------------------------------------------------------------------------------------------------------------------------------------------------------------------------------------------------------------------------------------------------------------------------------------------------------------|
| Grsf1 (mmu) ⓘ    | mmu-miR-27a-3p ⓘ |    | 0.540<br><a href="(/DianaTools/index.php?r=microT_CDS/results&amp;keywords=mmu-miR-27a-3p%20ENSMUSG00000044221&amp;genes=ENSMUSG00000044221&amp;mirnas=mmu-miR-27a-3p&amp;threshold=0)">(/DianaTools/index.php?<br/>r=microT_CDS/results&amp;keywords=mmu-<br/>miR-27a-<br/>3p%20ENSMUSG00000044221&amp;genes=ENSMUSG00000044221&amp;mirnas=mmu-<br/>miR-27a-<br/>3p&amp;threshold=0)</a> |
| Coro2b (mmu) ⓘ   | mmu-miR-27a-3p ⓘ |    | 0.533<br><a href="(/DianaTools/index.php?r=microT_CDS/results&amp;keywords=mmu-miR-27a-3p%20ENSMUSG00000041729&amp;genes=ENSMUSG00000041729&amp;mirnas=mmu-miR-27a-3p&amp;threshold=0)">(/DianaTools/index.php?<br/>r=microT_CDS/results&amp;keywords=mmu-<br/>miR-27a-<br/>3p%20ENSMUSG00000041729&amp;genes=ENSMUSG00000041729&amp;mirnas=mmu-<br/>miR-27a-<br/>3p&amp;threshold=0)</a> |
| Dnal1 (mmu) ⓘ    | mmu-miR-27a-3p ⓘ |    | 0.527<br><a href="(/DianaTools/index.php?r=microT_CDS/results&amp;keywords=mmu-miR-27a-3p%20ENSMUSG00000042523&amp;genes=ENSMUSG00000042523&amp;mirnas=mmu-miR-27a-3p&amp;threshold=0)">(/DianaTools/index.php?<br/>r=microT_CDS/results&amp;keywords=mmu-<br/>miR-27a-<br/>3p%20ENSMUSG00000042523&amp;genes=ENSMUSG00000042523&amp;mirnas=mmu-<br/>miR-27a-<br/>3p&amp;threshold=0)</a> |
| Smg7 (mmu) ⓘ     | mmu-miR-27a-3p ⓘ |    | 0.517<br><a href="(/DianaTools/index.php?r=microT_CDS/results&amp;keywords=mmu-miR-27a-3p%20ENSMUSG00000042772&amp;genes=ENSMUSG00000042772&amp;mirnas=mmu-miR-27a-3p&amp;threshold=0)">(/DianaTools/index.php?<br/>r=microT_CDS/results&amp;keywords=mmu-<br/>miR-27a-<br/>3p%20ENSMUSG00000042772&amp;genes=ENSMUSG00000042772&amp;mirnas=mmu-<br/>miR-27a-<br/>3p&amp;threshold=0)</a> |
| Tmem64 (mmu) ⓘ   | mmu-miR-27a-3p ⓘ |    | 0.494<br><a href="(/DianaTools/index.php?r=microT_CDS/results&amp;keywords=mmu-miR-27a-3p%20ENSMUSG00000043252&amp;genes=ENSMUSG00000043252&amp;mirnas=mmu-miR-27a-3p&amp;threshold=0)">(/DianaTools/index.php?<br/>r=microT_CDS/results&amp;keywords=mmu-<br/>miR-27a-<br/>3p%20ENSMUSG00000043252&amp;genes=ENSMUSG00000043252&amp;mirnas=mmu-<br/>miR-27a-<br/>3p&amp;threshold=0)</a> |
| Thrap3 (mmu) ⓘ   | mmu-miR-27a-3p ⓘ |    | 0.493<br><a href="(/DianaTools/index.php?r=microT_CDS/results&amp;keywords=mmu-miR-27a-3p%20ENSMUSG00000043962&amp;genes=ENSMUSG00000043962&amp;mirnas=mmu-miR-27a-3p&amp;threshold=0)">(/DianaTools/index.php?<br/>r=microT_CDS/results&amp;keywords=mmu-<br/>miR-27a-<br/>3p%20ENSMUSG00000043962&amp;genes=ENSMUSG00000043962&amp;mirnas=mmu-<br/>miR-27a-<br/>3p&amp;threshold=0)</a> |
| Gm15800 (mmu) ⓘ  | mmu-miR-27a-3p ⓘ |   | 0.491<br><a href="(/DianaTools/index.php?r=microT_CDS/results&amp;keywords=mmu-miR-27a-3p%20ENSMUSG00000042744&amp;genes=ENSMUSG00000042744&amp;mirnas=mmu-miR-27a-3p&amp;threshold=0)">(/DianaTools/index.php?<br/>r=microT_CDS/results&amp;keywords=mmu-<br/>miR-27a-<br/>3p%20ENSMUSG00000042744&amp;genes=ENSMUSG00000042744&amp;mirnas=mmu-<br/>miR-27a-<br/>3p&amp;threshold=0)</a> |
| Ikbke (mmu) ⓘ    | mmu-miR-27a-3p ⓘ |  | 0.489<br><a href="(/DianaTools/index.php?r=microT_CDS/results&amp;keywords=mmu-miR-27a-3p%20ENSMUSG00000042349&amp;genes=ENSMUSG00000042349&amp;mirnas=mmu-miR-27a-3p&amp;threshold=0)">(/DianaTools/index.php?<br/>r=microT_CDS/results&amp;keywords=mmu-<br/>miR-27a-<br/>3p%20ENSMUSG00000042349&amp;genes=ENSMUSG00000042349&amp;mirnas=mmu-<br/>miR-27a-<br/>3p&amp;threshold=0)</a> |
| Usp22 (mmu) ⓘ    | mmu-miR-27a-3p ⓘ |  | 0.479<br><a href="(/DianaTools/index.php?r=microT_CDS/results&amp;keywords=mmu-miR-27a-3p%20ENSMUSG00000042506&amp;genes=ENSMUSG00000042506&amp;mirnas=mmu-miR-27a-3p&amp;threshold=0)">(/DianaTools/index.php?<br/>r=microT_CDS/results&amp;keywords=mmu-<br/>miR-27a-<br/>3p%20ENSMUSG00000042506&amp;genes=ENSMUSG00000042506&amp;mirnas=mmu-<br/>miR-27a-<br/>3p&amp;threshold=0)</a> |
| AW549877 (mmu) ⓘ | mmu-miR-27a-3p ⓘ |  | 0.476<br><a href="(/DianaTools/index.php?r=microT_CDS/results&amp;keywords=mmu-miR-27a-3p%20ENSMUSG00000041935&amp;genes=ENSMUSG00000041935&amp;mirnas=mmu-miR-27a-3p&amp;threshold=0)">(/DianaTools/index.php?<br/>r=microT_CDS/results&amp;keywords=mmu-<br/>miR-27a-<br/>3p%20ENSMUSG00000041935&amp;genes=ENSMUSG00000041935&amp;mirnas=mmu-<br/>miR-27a-<br/>3p&amp;threshold=0)</a> |
| Crb3 (mmu) ⓘ     | mmu-miR-27a-3p ⓘ |  | 0.463<br><a href="(/DianaTools/index.php?r=microT_CDS/results&amp;keywords=mmu-miR-27a-3p%20ENSMUSG00000044279&amp;genes=ENSMUSG00000044279&amp;mirnas=mmu-miR-27a-3p&amp;threshold=0)">(/DianaTools/index.php?<br/>r=microT_CDS/results&amp;keywords=mmu-<br/>miR-27a-<br/>3p%20ENSMUSG00000044279&amp;genes=ENSMUSG00000044279&amp;mirnas=mmu-<br/>miR-27a-<br/>3p&amp;threshold=0)</a> |

We have placed cookies on your device to help make this website and the services we offer better. By using this site, you agree to the use of cookies. [Learn more](#) ([\(/DianaTools/index.php?r=site/terms\)]((/DianaTools/index.php?r=site/terms))).

I accept



|                   |                  |    |   |
|-------------------|------------------|----|---|
| Filip1l (mmu) ⓘ   | mmu-miR-27a-3p ⓘ | IP | - |
| Elmsan1 (mmu) ⓘ   | mmu-miR-27a-3p ⓘ | IP | - |
| Pla2g6 (mmu) ⓘ    | mmu-miR-27a-3p ⓘ | IP | - |
| Ptgir (mmu) ⓘ     | mmu-miR-27a-3p ⓘ | IP | - |
| Naa25 (mmu) ⓘ     | mmu-miR-27a-3p ⓘ | IP | - |
| Serpinb6b (mmu) ⓘ | mmu-miR-27a-3p ⓘ | IP | - |
| Stab1 (mmu) ⓘ     | mmu-miR-27a-3p ⓘ | IP | - |
| Zfp281 (mmu) ⓘ    | mmu-miR-27a-3p ⓘ | IP | - |
| Slco1a1 (mmu) ⓘ   | mmu-miR-27a-3p ⓘ | IP | - |
| Mat2b (mmu) ⓘ     | mmu-miR-27a-3p ⓘ | IP | - |
| Maneal (mmu) ⓘ    | mmu-miR-27a-3p ⓘ | IP | - |
| Ctla2a (mmu) ⓘ    | mmu-miR-27a-3p ⓘ | IP | - |
| Zfp386 (mmu) ⓘ    | mmu-miR-27a-3p ⓘ | IP | - |
| Cnr1 (mmu) ⓘ      | mmu-miR-27a-3p ⓘ | IP | - |
| Tlr7 (mmu) ⓘ      | mmu-miR-27a-3p ⓘ | IP | - |
| Leo1 (mmu) ⓘ      | mmu-miR-27a-3p ⓘ | IP | - |
| Fam25c (mmu) ⓘ    | mmu-miR-27a-3p ⓘ | IP | - |
| Rasip1 (mmu) ⓘ    | mmu-miR-27a-3p ⓘ | IP | - |
| Pbrm1 (mmu) ⓘ     | mmu-miR-27a-3p ⓘ | IP | - |
| Agps (mmu) ⓘ      | mmu-miR-27a-3p ⓘ | IP | - |
| Stab1 (mmu) ⓘ     | mmu-miR-27a-3p ⓘ | IP | - |
| Snhg11 (mmu) ⓘ    | mmu-miR-27a-3p ⓘ | IP | - |
| Gpr146 (mmu) ⓘ    | mmu-miR-27a-3p ⓘ | IP | - |
| Kdm5b (mmu) ⓘ     | mmu-miR-27a-3p ⓘ | IP | - |
| Kdm5b (mmu) ⓘ     | mmu-miR-27a-3p ⓘ | IP | - |
| Itga1 (mmu) ⓘ     | mmu-miR-27a-3p ⓘ | IP | - |
| Nup62 (mmu) ⓘ     | mmu-miR-27a-3p ⓘ | IP | - |
| Agrn (mmu) ⓘ      | mmu-miR-27a-3p ⓘ | IP | - |
| Phlpp1 (mmu) ⓘ    | mmu-miR-27a-3p ⓘ | IP | - |
| Gcn1l1 (mmu) ⓘ    | mmu-miR-27a-3p ⓘ | IP | - |
| Tpp2 (mmu) ⓘ      | mmu-miR-27a-3p ⓘ | IP | - |
| Dock5 (mmu) ⓘ     | mmu-miR-27a-3p ⓘ | IP | - |

We have placed cookies on your device to help make this website and the services we offer better. By using this site, you agree to the use of cookies. [Learn more \(/DianaTools/index.php?r=site/terms\)](#).

I accept

|                  |                  |                                                                                      |                                                                                                                                                                                                                                                                                                                                                          |
|------------------|------------------|--------------------------------------------------------------------------------------|----------------------------------------------------------------------------------------------------------------------------------------------------------------------------------------------------------------------------------------------------------------------------------------------------------------------------------------------------------|
| Gm9774 (mmu) ⓘ   | mmu-miR-27a-3p ⓘ |     | -                                                                                                                                                                                                                                                                                                                                                        |
| Simc1 (mmu) ⓘ    | mmu-miR-27a-3p ⓘ |    | -                                                                                                                                                                                                                                                                                                                                                        |
| Rsb1 (mmu) ⓘ     | mmu-miR-27a-3p ⓘ |    | -                                                                                                                                                                                                                                                                                                                                                        |
| Rsb1 (mmu) ⓘ     | mmu-miR-27a-3p ⓘ |    | -                                                                                                                                                                                                                                                                                                                                                        |
| Pyrox1 (mmu) ⓘ   | mmu-miR-27a-3p ⓘ |    | -                                                                                                                                                                                                                                                                                                                                                        |
| Pik3r1 (mmu) ⓘ   | mmu-miR-27a-3p ⓘ |    | -                                                                                                                                                                                                                                                                                                                                                        |
| Ubr3 (mmu) ⓘ     | mmu-miR-27a-3p ⓘ |    | -                                                                                                                                                                                                                                                                                                                                                        |
| Krtcap2 (mmu) ⓘ  | mmu-miR-27a-3p ⓘ |    | -                                                                                                                                                                                                                                                                                                                                                        |
| Setd2 (mmu) ⓘ    | mmu-miR-27a-3p ⓘ |    | 1.000<br><a href="/DianaTools/index.php?r=miR_CDS/results&amp;keywords=mmu-miR-27a-3p%20ENSMUSG00000044791&amp;genes=ENSMUSG00000044791&amp;mirnas=mmu-miR-27a-3p&amp;threshold=0">(/DianaTools/index.php?r=miR_CDS/results&amp;keywords=mmu-miR-27a-3p%20ENSMUSG00000044791&amp;genes=ENSMUSG00000044791&amp;mirnas=mmu-miR-27a-3p&amp;threshold=0)</a> |
| Tnfrsf26 (mmu) ⓘ | mmu-miR-27a-3p ⓘ |    | 1.000<br><a href="/DianaTools/index.php?r=miR_CDS/results&amp;keywords=mmu-miR-27a-3p%20ENSMUSG00000045362&amp;genes=ENSMUSG00000045362&amp;mirnas=mmu-miR-27a-3p&amp;threshold=0">(/DianaTools/index.php?r=miR_CDS/results&amp;keywords=mmu-miR-27a-3p%20ENSMUSG00000045362&amp;genes=ENSMUSG00000045362&amp;mirnas=mmu-miR-27a-3p&amp;threshold=0)</a> |
| Crebrf (mmu) ⓘ   | mmu-miR-27a-3p ⓘ |    | 0.993<br><a href="/DianaTools/index.php?r=miR_CDS/results&amp;keywords=mmu-miR-27a-3p%20ENSMUSG00000048249&amp;genes=ENSMUSG00000048249&amp;mirnas=mmu-miR-27a-3p&amp;threshold=0">(/DianaTools/index.php?r=miR_CDS/results&amp;keywords=mmu-miR-27a-3p%20ENSMUSG00000048249&amp;genes=ENSMUSG00000048249&amp;mirnas=mmu-miR-27a-3p&amp;threshold=0)</a> |
| Crebrf (mmu) ⓘ   | mmu-miR-27a-3p ⓘ |    | 0.993<br><a href="/DianaTools/index.php?r=miR_CDS/results&amp;keywords=mmu-miR-27a-3p%20ENSMUSG00000048249&amp;genes=ENSMUSG00000048249&amp;mirnas=mmu-miR-27a-3p&amp;threshold=0">(/DianaTools/index.php?r=miR_CDS/results&amp;keywords=mmu-miR-27a-3p%20ENSMUSG00000048249&amp;genes=ENSMUSG00000048249&amp;mirnas=mmu-miR-27a-3p&amp;threshold=0)</a> |
| Wbp1l (mmu) ⓘ    | mmu-miR-27a-3p ⓘ |  | 0.966<br><a href="/DianaTools/index.php?r=miR_CDS/results&amp;keywords=mmu-miR-27a-3p%20ENSMUSG00000047731&amp;genes=ENSMUSG00000047731&amp;mirnas=mmu-miR-27a-3p&amp;threshold=0">(/DianaTools/index.php?r=miR_CDS/results&amp;keywords=mmu-miR-27a-3p%20ENSMUSG00000047731&amp;genes=ENSMUSG00000047731&amp;mirnas=mmu-miR-27a-3p&amp;threshold=0)</a> |
| Fbxo30 (mmu) ⓘ   | mmu-miR-27a-3p ⓘ |  | 0.936<br><a href="/DianaTools/index.php?r=miR_CDS/results&amp;keywords=mmu-miR-27a-3p%20ENSMUSG00000047648&amp;genes=ENSMUSG00000047648&amp;mirnas=mmu-miR-27a-3p&amp;threshold=0">(/DianaTools/index.php?r=miR_CDS/results&amp;keywords=mmu-miR-27a-3p%20ENSMUSG00000047648&amp;genes=ENSMUSG00000047648&amp;mirnas=mmu-miR-27a-3p&amp;threshold=0)</a> |
| Ppm1e (mmu) ⓘ    | mmu-miR-27a-3p ⓘ |  | 0.930<br><a href="/DianaTools/index.php?r=miR_CDS/results&amp;keywords=mmu-miR-27a-3p%20ENSMUSG00000046442&amp;genes=ENSMUSG00000046442&amp;mirnas=mmu-miR-27a-3p&amp;threshold=0">(/DianaTools/index.php?r=miR_CDS/results&amp;keywords=mmu-miR-27a-3p%20ENSMUSG00000046442&amp;genes=ENSMUSG00000046442&amp;mirnas=mmu-miR-27a-3p&amp;threshold=0)</a> |
| BC030336 (mmu) ⓘ | mmu-miR-27a-3p ⓘ |  | 0.930<br><a href="/DianaTools/index.php?r=miR_CDS/results&amp;keywords=mmu-miR-27a-3p%20ENSMUSG00000046096&amp;genes=ENSMUSG00000046096&amp;mirnas=mmu-miR-27a-3p&amp;threshold=0">(/DianaTools/index.php?r=miR_CDS/results&amp;keywords=mmu-miR-27a-3p%20ENSMUSG00000046096&amp;genes=ENSMUSG00000046096&amp;mirnas=mmu-miR-27a-3p&amp;threshold=0)</a> |

We have placed cookies on your device to help make this website and the services we offer better. By using this site, you agree to the use of cookies. [Learn more](#) (</DianaTools/index.php?r=site/terms>).

I accept

|                       |                  |                                                                                      |                                                                                                                                                                                                                                                                                                                                                                                           |
|-----------------------|------------------|--------------------------------------------------------------------------------------|-------------------------------------------------------------------------------------------------------------------------------------------------------------------------------------------------------------------------------------------------------------------------------------------------------------------------------------------------------------------------------------------|
| E130308A19Rik (mmu) ⓘ | mmu-miR-27a-3p ⓘ |    | 0.899<br><a href="(/DianaTools/index.php?r=microT_CDS/results&amp;keywords=mmu-miR-27a-3p%20ENSMUSG00000045071&amp;genes=ENSMUSG00000045071&amp;mirnas=mmu-miR-27a-3p&amp;threshold=0)">(/DianaTools/index.php?<br/>r=microT_CDS/results&amp;keywords=mmu-<br/>miR-27a-<br/>3p%20ENSMUSG00000045071&amp;genes=ENSMUSG00000045071&amp;mirnas=mmu-<br/>miR-27a-<br/>3p&amp;threshold=0)</a> |
| E130308A19Rik (mmu) ⓘ | mmu-miR-27a-3p ⓘ |    | 0.899<br><a href="(/DianaTools/index.php?r=microT_CDS/results&amp;keywords=mmu-miR-27a-3p%20ENSMUSG00000045071&amp;genes=ENSMUSG00000045071&amp;mirnas=mmu-miR-27a-3p&amp;threshold=0)">(/DianaTools/index.php?<br/>r=microT_CDS/results&amp;keywords=mmu-<br/>miR-27a-<br/>3p%20ENSMUSG00000045071&amp;genes=ENSMUSG00000045071&amp;mirnas=mmu-<br/>miR-27a-<br/>3p&amp;threshold=0)</a> |
| Adamts6 (mmu) ⓘ       | mmu-miR-27a-3p ⓘ |    | 0.898<br><a href="(/DianaTools/index.php?r=microT_CDS/results&amp;keywords=mmu-miR-27a-3p%20ENSMUSG00000046169&amp;genes=ENSMUSG00000046169&amp;mirnas=mmu-miR-27a-3p&amp;threshold=0)">(/DianaTools/index.php?<br/>r=microT_CDS/results&amp;keywords=mmu-<br/>miR-27a-<br/>3p%20ENSMUSG00000046169&amp;genes=ENSMUSG00000046169&amp;mirnas=mmu-<br/>miR-27a-<br/>3p&amp;threshold=0)</a> |
| Pard6b (mmu) ⓘ        | mmu-miR-27a-3p ⓘ |    | 0.850<br><a href="(/DianaTools/index.php?r=microT_CDS/results&amp;keywords=mmu-miR-27a-3p%20ENSMUSG00000044641&amp;genes=ENSMUSG00000044641&amp;mirnas=mmu-miR-27a-3p&amp;threshold=0)">(/DianaTools/index.php?<br/>r=microT_CDS/results&amp;keywords=mmu-<br/>miR-27a-<br/>3p%20ENSMUSG00000044641&amp;genes=ENSMUSG00000044641&amp;mirnas=mmu-<br/>miR-27a-<br/>3p&amp;threshold=0)</a> |
| Pard6b (mmu) ⓘ        | mmu-miR-27a-3p ⓘ |    | 0.850<br><a href="(/DianaTools/index.php?r=microT_CDS/results&amp;keywords=mmu-miR-27a-3p%20ENSMUSG00000044641&amp;genes=ENSMUSG00000044641&amp;mirnas=mmu-miR-27a-3p&amp;threshold=0)">(/DianaTools/index.php?<br/>r=microT_CDS/results&amp;keywords=mmu-<br/>miR-27a-<br/>3p%20ENSMUSG00000044641&amp;genes=ENSMUSG00000044641&amp;mirnas=mmu-<br/>miR-27a-<br/>3p&amp;threshold=0)</a> |
| Sdpr (mmu) ⓘ          | mmu-miR-27a-3p ⓘ |    | 0.837<br><a href="(/DianaTools/index.php?r=microT_CDS/results&amp;keywords=mmu-miR-27a-3p%20ENSMUSG00000045954&amp;genes=ENSMUSG00000045954&amp;mirnas=mmu-miR-27a-3p&amp;threshold=0)">(/DianaTools/index.php?<br/>r=microT_CDS/results&amp;keywords=mmu-<br/>miR-27a-<br/>3p%20ENSMUSG00000045954&amp;genes=ENSMUSG00000045954&amp;mirnas=mmu-<br/>miR-27a-<br/>3p&amp;threshold=0)</a> |
| Spata2 (mmu) ⓘ        | mmu-miR-27a-3p ⓘ |   | 0.805<br><a href="(/DianaTools/index.php?r=microT_CDS/results&amp;keywords=mmu-miR-27a-3p%20ENSMUSG00000047030&amp;genes=ENSMUSG00000047030&amp;mirnas=mmu-miR-27a-3p&amp;threshold=0)">(/DianaTools/index.php?<br/>r=microT_CDS/results&amp;keywords=mmu-<br/>miR-27a-<br/>3p%20ENSMUSG00000047030&amp;genes=ENSMUSG00000047030&amp;mirnas=mmu-<br/>miR-27a-<br/>3p&amp;threshold=0)</a> |
| Phf13 (mmu) ⓘ         | mmu-miR-27a-3p ⓘ |  | 0.804<br><a href="(/DianaTools/index.php?r=microT_CDS/results&amp;keywords=mmu-miR-27a-3p%20ENSMUSG00000047777&amp;genes=ENSMUSG00000047777&amp;mirnas=mmu-miR-27a-3p&amp;threshold=0)">(/DianaTools/index.php?<br/>r=microT_CDS/results&amp;keywords=mmu-<br/>miR-27a-<br/>3p%20ENSMUSG00000047777&amp;genes=ENSMUSG00000047777&amp;mirnas=mmu-<br/>miR-27a-<br/>3p&amp;threshold=0)</a> |
| Yod1 (mmu) ⓘ          | mmu-miR-27a-3p ⓘ |  | 0.786<br><a href="(/DianaTools/index.php?r=microT_CDS/results&amp;keywords=mmu-miR-27a-3p%20ENSMUSG00000046404&amp;genes=ENSMUSG00000046404&amp;mirnas=mmu-miR-27a-3p&amp;threshold=0)">(/DianaTools/index.php?<br/>r=microT_CDS/results&amp;keywords=mmu-<br/>miR-27a-<br/>3p%20ENSMUSG00000046404&amp;genes=ENSMUSG00000046404&amp;mirnas=mmu-<br/>miR-27a-<br/>3p&amp;threshold=0)</a> |
| Zbtb44 (mmu) ⓘ        | mmu-miR-27a-3p ⓘ |  | 0.780<br><a href="(/DianaTools/index.php?r=microT_CDS/results&amp;keywords=mmu-miR-27a-3p%20ENSMUSG00000047412&amp;genes=ENSMUSG00000047412&amp;mirnas=mmu-miR-27a-3p&amp;threshold=0)">(/DianaTools/index.php?<br/>r=microT_CDS/results&amp;keywords=mmu-<br/>miR-27a-<br/>3p%20ENSMUSG00000047412&amp;genes=ENSMUSG00000047412&amp;mirnas=mmu-<br/>miR-27a-<br/>3p&amp;threshold=0)</a> |
| Cnrip1 (mmu) ⓘ        | mmu-miR-27a-3p ⓘ |  | 0.775<br><a href="(/DianaTools/index.php?r=microT_CDS/results&amp;keywords=mmu-miR-27a-3p%20ENSMUSG00000044629&amp;genes=ENSMUSG00000044629&amp;mirnas=mmu-miR-27a-3p&amp;threshold=0)">(/DianaTools/index.php?<br/>r=microT_CDS/results&amp;keywords=mmu-<br/>miR-27a-<br/>3p%20ENSMUSG00000044629&amp;genes=ENSMUSG00000044629&amp;mirnas=mmu-<br/>miR-27a-<br/>3p&amp;threshold=0)</a> |

We have placed cookies on your device to help make this website and the services we offer better. By using this site, you agree to the use of cookies. [Learn more](#) ([\(/DianaTools/index.php?r=site/terms\)]((/DianaTools/index.php?r=site/terms)))

I accept

|                 |                  |                                                                                      |                                                                                                                                                                                                                                                                                                                                                                                           |
|-----------------|------------------|--------------------------------------------------------------------------------------|-------------------------------------------------------------------------------------------------------------------------------------------------------------------------------------------------------------------------------------------------------------------------------------------------------------------------------------------------------------------------------------------|
| Rnf150 (mmu) ⓘ  | mmu-miR-27a-3p ⓘ |    | 0.768<br><a href="(/DianaTools/index.php?r=microT_CDS/results&amp;keywords=mmu-miR-27a-3p%20ENSMUSG00000047747&amp;genes=ENSMUSG00000047747&amp;mirnas=mmu-miR-27a-3p&amp;threshold=0)">(/DianaTools/index.php?<br/>r=microT_CDS/results&amp;keywords=mmu-<br/>miR-27a-<br/>3p%20ENSMUSG00000047747&amp;genes=ENSMUSG00000047747&amp;mirnas=mmu-<br/>miR-27a-<br/>3p&amp;threshold=0)</a> |
| Zfp654 (mmu) ⓘ  | mmu-miR-27a-3p ⓘ |    | 0.764<br><a href="(/DianaTools/index.php?r=microT_CDS/results&amp;keywords=mmu-miR-27a-3p%20ENSMUSG00000047141&amp;genes=ENSMUSG00000047141&amp;mirnas=mmu-miR-27a-3p&amp;threshold=0)">(/DianaTools/index.php?<br/>r=microT_CDS/results&amp;keywords=mmu-<br/>miR-27a-<br/>3p%20ENSMUSG00000047141&amp;genes=ENSMUSG00000047141&amp;mirnas=mmu-<br/>miR-27a-<br/>3p&amp;threshold=0)</a> |
| Tnrc6b (mmu) ⓘ  | mmu-miR-27a-3p ⓘ |    | 0.733<br><a href="(/DianaTools/index.php?r=microT_CDS/results&amp;keywords=mmu-miR-27a-3p%20ENSMUSG00000047888&amp;genes=ENSMUSG00000047888&amp;mirnas=mmu-miR-27a-3p&amp;threshold=0)">(/DianaTools/index.php?<br/>r=microT_CDS/results&amp;keywords=mmu-<br/>miR-27a-<br/>3p%20ENSMUSG00000047888&amp;genes=ENSMUSG00000047888&amp;mirnas=mmu-<br/>miR-27a-<br/>3p&amp;threshold=0)</a> |
| Lemd3 (mmu) ⓘ   | mmu-miR-27a-3p ⓘ |    | 0.732<br><a href="(/DianaTools/index.php?r=microT_CDS/results&amp;keywords=mmu-miR-27a-3p%20ENSMUSG00000048661&amp;genes=ENSMUSG00000048661&amp;mirnas=mmu-miR-27a-3p&amp;threshold=0)">(/DianaTools/index.php?<br/>r=microT_CDS/results&amp;keywords=mmu-<br/>miR-27a-<br/>3p%20ENSMUSG00000048661&amp;genes=ENSMUSG00000048661&amp;mirnas=mmu-<br/>miR-27a-<br/>3p&amp;threshold=0)</a> |
| Prex2 (mmu) ⓘ   | mmu-miR-27a-3p ⓘ |    | 0.723<br><a href="(/DianaTools/index.php?r=microT_CDS/results&amp;keywords=mmu-miR-27a-3p%20ENSMUSG00000048960&amp;genes=ENSMUSG00000048960&amp;mirnas=mmu-miR-27a-3p&amp;threshold=0)">(/DianaTools/index.php?<br/>r=microT_CDS/results&amp;keywords=mmu-<br/>miR-27a-<br/>3p%20ENSMUSG00000048960&amp;genes=ENSMUSG00000048960&amp;mirnas=mmu-<br/>miR-27a-<br/>3p&amp;threshold=0)</a> |
| Prex2 (mmu) ⓘ   | mmu-miR-27a-3p ⓘ |    | 0.723<br><a href="(/DianaTools/index.php?r=microT_CDS/results&amp;keywords=mmu-miR-27a-3p%20ENSMUSG00000048960&amp;genes=ENSMUSG00000048960&amp;mirnas=mmu-miR-27a-3p&amp;threshold=0)">(/DianaTools/index.php?<br/>r=microT_CDS/results&amp;keywords=mmu-<br/>miR-27a-<br/>3p%20ENSMUSG00000048960&amp;genes=ENSMUSG00000048960&amp;mirnas=mmu-<br/>miR-27a-<br/>3p&amp;threshold=0)</a> |
| Prkce (mmu) ⓘ   | mmu-miR-27a-3p ⓘ |    | 0.723<br><a href="(/DianaTools/index.php?r=microT_CDS/results&amp;keywords=mmu-miR-27a-3p%20ENSMUSG00000045038&amp;genes=ENSMUSG00000045038&amp;mirnas=mmu-miR-27a-3p&amp;threshold=0)">(/DianaTools/index.php?<br/>r=microT_CDS/results&amp;keywords=mmu-<br/>miR-27a-<br/>3p%20ENSMUSG00000045038&amp;genes=ENSMUSG00000045038&amp;mirnas=mmu-<br/>miR-27a-<br/>3p&amp;threshold=0)</a> |
| Ngfrap1 (mmu) ⓘ | mmu-miR-27a-3p ⓘ |  | 0.717<br><a href="(/DianaTools/index.php?r=microT_CDS/results&amp;keywords=mmu-miR-27a-3p%20ENSMUSG00000046432&amp;genes=ENSMUSG00000046432&amp;mirnas=mmu-miR-27a-3p&amp;threshold=0)">(/DianaTools/index.php?<br/>r=microT_CDS/results&amp;keywords=mmu-<br/>miR-27a-<br/>3p%20ENSMUSG00000046432&amp;genes=ENSMUSG00000046432&amp;mirnas=mmu-<br/>miR-27a-<br/>3p&amp;threshold=0)</a> |
| Zfp3612 (mmu) ⓘ | mmu-miR-27a-3p ⓘ |  | 0.712<br><a href="(/DianaTools/index.php?r=microT_CDS/results&amp;keywords=mmu-miR-27a-3p%20ENSMUSG00000045817&amp;genes=ENSMUSG00000045817&amp;mirnas=mmu-miR-27a-3p&amp;threshold=0)">(/DianaTools/index.php?<br/>r=microT_CDS/results&amp;keywords=mmu-<br/>miR-27a-<br/>3p%20ENSMUSG00000045817&amp;genes=ENSMUSG00000045817&amp;mirnas=mmu-<br/>miR-27a-<br/>3p&amp;threshold=0)</a> |
| Fam171b (mmu) ⓘ | mmu-miR-27a-3p ⓘ |  | 0.711<br><a href="(/DianaTools/index.php?r=microT_CDS/results&amp;keywords=mmu-miR-27a-3p%20ENSMUSG00000048388&amp;genes=ENSMUSG00000048388&amp;mirnas=mmu-miR-27a-3p&amp;threshold=0)">(/DianaTools/index.php?<br/>r=microT_CDS/results&amp;keywords=mmu-<br/>miR-27a-<br/>3p%20ENSMUSG00000048388&amp;genes=ENSMUSG00000048388&amp;mirnas=mmu-<br/>miR-27a-<br/>3p&amp;threshold=0)</a> |
| Zfp36 (mmu) ⓘ   | mmu-miR-27a-3p ⓘ |  | 0.700<br><a href="(/DianaTools/index.php?r=microT_CDS/results&amp;keywords=mmu-miR-27a-3p%20ENSMUSG00000044786&amp;genes=ENSMUSG00000044786&amp;mirnas=mmu-miR-27a-3p&amp;threshold=0)">(/DianaTools/index.php?<br/>r=microT_CDS/results&amp;keywords=mmu-<br/>miR-27a-<br/>3p%20ENSMUSG00000044786&amp;genes=ENSMUSG00000044786&amp;mirnas=mmu-<br/>miR-27a-<br/>3p&amp;threshold=0)</a> |

We have placed cookies on your device to help make this website and the services we offer better. By using this site, you agree to the use of cookies. [Learn more](#) ([\(/DianaTools/index.php?r=site/terms\)]((/DianaTools/index.php?r=site/terms)))

I accept

|                    |                  |                                                                                      |                                                                                                                                                                                                              |
|--------------------|------------------|--------------------------------------------------------------------------------------|--------------------------------------------------------------------------------------------------------------------------------------------------------------------------------------------------------------|
| Zfp473 (mmu) ⓘ     | mmu-miR-27a-3p ⓘ |    | <a href="#">0.699</a><br><a href="#">(/DianaTools/index.php?r=miroT_CDS/results&amp;keywords=mmu-miR-27a-3p%20ENSMUSG00000048012&amp;genes=ENSMUSG00000048012&amp;mirnas=mmu-miR-27a-3p&amp;threshold=0)</a> |
| Acap2 (mmu) ⓘ      | mmu-miR-27a-3p ⓘ |    | <a href="#">0.690</a><br><a href="#">(/DianaTools/index.php?r=miroT_CDS/results&amp;keywords=mmu-miR-27a-3p%20ENSMUSG00000049076&amp;genes=ENSMUSG00000049076&amp;mirnas=mmu-miR-27a-3p&amp;threshold=0)</a> |
| Tmem229a (mmu) ⓘ   | mmu-miR-27a-3p ⓘ |    | <a href="#">0.681</a><br><a href="#">(/DianaTools/index.php?r=miroT_CDS/results&amp;keywords=mmu-miR-27a-3p%20ENSMUSG00000048022&amp;genes=ENSMUSG00000048022&amp;mirnas=mmu-miR-27a-3p&amp;threshold=0)</a> |
| D3Bwg0562e (mmu) ⓘ | mmu-miR-27a-3p ⓘ |    | <a href="#">0.666</a><br><a href="#">(/DianaTools/index.php?r=miroT_CDS/results&amp;keywords=mmu-miR-27a-3p%20ENSMUSG00000044667&amp;genes=ENSMUSG00000044667&amp;mirnas=mmu-miR-27a-3p&amp;threshold=0)</a> |
| Cdk5r1 (mmu) ⓘ     | mmu-miR-27a-3p ⓘ |    | <a href="#">0.652</a><br><a href="#">(/DianaTools/index.php?r=miroT_CDS/results&amp;keywords=mmu-miR-27a-3p%20ENSMUSG00000048895&amp;genes=ENSMUSG00000048895&amp;mirnas=mmu-miR-27a-3p&amp;threshold=0)</a> |
| Tubb2b (mmu) ⓘ     | mmu-miR-27a-3p ⓘ |    | <a href="#">0.652</a><br><a href="#">(/DianaTools/index.php?r=miroT_CDS/results&amp;keywords=mmu-miR-27a-3p%20ENSMUSG00000045136&amp;genes=ENSMUSG00000045136&amp;mirnas=mmu-miR-27a-3p&amp;threshold=0)</a> |
| Kmt2d (mmu) ⓘ      | mmu-miR-27a-3p ⓘ |    | <a href="#">0.618</a><br><a href="#">(/DianaTools/index.php?r=miroT_CDS/results&amp;keywords=mmu-miR-27a-3p%20ENSMUSG00000048154&amp;genes=ENSMUSG00000048154&amp;mirnas=mmu-miR-27a-3p&amp;threshold=0)</a> |
| Rnf149 (mmu) ⓘ     | mmu-miR-27a-3p ⓘ |  | <a href="#">0.613</a><br><a href="#">(/DianaTools/index.php?r=miroT_CDS/results&amp;keywords=mmu-miR-27a-3p%20ENSMUSG00000048234&amp;genes=ENSMUSG00000048234&amp;mirnas=mmu-miR-27a-3p&amp;threshold=0)</a> |
| Rnf149 (mmu) ⓘ     | mmu-miR-27a-3p ⓘ |  | <a href="#">0.613</a><br><a href="#">(/DianaTools/index.php?r=miroT_CDS/results&amp;keywords=mmu-miR-27a-3p%20ENSMUSG00000048234&amp;genes=ENSMUSG00000048234&amp;mirnas=mmu-miR-27a-3p&amp;threshold=0)</a> |
| Nat8l (mmu) ⓘ      | mmu-miR-27a-3p ⓘ |  | <a href="#">0.606</a><br><a href="#">(/DianaTools/index.php?r=miroT_CDS/results&amp;keywords=mmu-miR-27a-3p%20ENSMUSG00000048142&amp;genes=ENSMUSG00000048142&amp;mirnas=mmu-miR-27a-3p&amp;threshold=0)</a> |
| Atxn1 (mmu) ⓘ      | mmu-miR-27a-3p ⓘ |  | <a href="#">0.594</a><br><a href="#">(/DianaTools/index.php?r=miroT_CDS/results&amp;keywords=mmu-miR-27a-3p%20ENSMUSG00000046876&amp;genes=ENSMUSG00000046876&amp;mirnas=mmu-miR-27a-3p&amp;threshold=0)</a> |

We have placed cookies on your device to help make this website and the services we offer better. By using this site, you agree to the use of cookies. [Learn more](#) ([/DianaTools/index.php?r=site/terms](#)).

I accept

|                 |                  |                                                                                      |                                                                                                                                                                                               |
|-----------------|------------------|--------------------------------------------------------------------------------------|-----------------------------------------------------------------------------------------------------------------------------------------------------------------------------------------------|
| Lhfp12 (mmu) ⓘ  | mmu-miR-27a-3p ⓘ |    | 0.593<br><a href="#">(/DianaTools/index.php?r=microT_CDS/results&amp;keywords=mmu-miR-27a-3p%20ENSMUSG00000045312&amp;genes=ENSMUSG00000045312&amp;mirnas=mmu-miR-27a-3p&amp;threshold=0)</a> |
| Lhfp12 (mmu) ⓘ  | mmu-miR-27a-3p ⓘ |    | 0.593<br><a href="#">(/DianaTools/index.php?r=microT_CDS/results&amp;keywords=mmu-miR-27a-3p%20ENSMUSG00000045312&amp;genes=ENSMUSG00000045312&amp;mirnas=mmu-miR-27a-3p&amp;threshold=0)</a> |
| Vcpip1 (mmu) ⓘ  | mmu-miR-27a-3p ⓘ |    | 0.591<br><a href="#">(/DianaTools/index.php?r=microT_CDS/results&amp;keywords=mmu-miR-27a-3p%20ENSMUSG00000045210&amp;genes=ENSMUSG00000045210&amp;mirnas=mmu-miR-27a-3p&amp;threshold=0)</a> |
| Ppp1r3b (mmu) ⓘ | mmu-miR-27a-3p ⓘ |    | 0.580<br><a href="#">(/DianaTools/index.php?r=microT_CDS/results&amp;keywords=mmu-miR-27a-3p%20ENSMUSG00000046794&amp;genes=ENSMUSG00000046794&amp;mirnas=mmu-miR-27a-3p&amp;threshold=0)</a> |
| Nhlh2 (mmu) ⓘ   | mmu-miR-27a-3p ⓘ |    | 0.576<br><a href="#">(/DianaTools/index.php?r=microT_CDS/results&amp;keywords=mmu-miR-27a-3p%20ENSMUSG00000048540&amp;genes=ENSMUSG00000048540&amp;mirnas=mmu-miR-27a-3p&amp;threshold=0)</a> |
| Mcmbp (mmu) ⓘ   | mmu-miR-27a-3p ⓘ |    | 0.576<br><a href="#">(/DianaTools/index.php?r=microT_CDS/results&amp;keywords=mmu-miR-27a-3p%20ENSMUSG00000048170&amp;genes=ENSMUSG00000048170&amp;mirnas=mmu-miR-27a-3p&amp;threshold=0)</a> |
| Tob2 (mmu) ⓘ    | mmu-miR-27a-3p ⓘ |   | 0.552<br><a href="#">(/DianaTools/index.php?r=microT_CDS/results&amp;keywords=mmu-miR-27a-3p%20ENSMUSG00000048546&amp;genes=ENSMUSG00000048546&amp;mirnas=mmu-miR-27a-3p&amp;threshold=0)</a> |
| Coa7 (mmu) ⓘ    | mmu-miR-27a-3p ⓘ |  | 0.548<br><a href="#">(/DianaTools/index.php?r=microT_CDS/results&amp;keywords=mmu-miR-27a-3p%20ENSMUSG00000048351&amp;genes=ENSMUSG00000048351&amp;mirnas=mmu-miR-27a-3p&amp;threshold=0)</a> |
| Gpr158 (mmu) ⓘ  | mmu-miR-27a-3p ⓘ |  | 0.548<br><a href="#">(/DianaTools/index.php?r=microT_CDS/results&amp;keywords=mmu-miR-27a-3p%20ENSMUSG00000045967&amp;genes=ENSMUSG00000045967&amp;mirnas=mmu-miR-27a-3p&amp;threshold=0)</a> |
| Ccbe1 (mmu) ⓘ   | mmu-miR-27a-3p ⓘ |  | 0.544<br><a href="#">(/DianaTools/index.php?r=microT_CDS/results&amp;keywords=mmu-miR-27a-3p%20ENSMUSG00000046318&amp;genes=ENSMUSG00000046318&amp;mirnas=mmu-miR-27a-3p&amp;threshold=0)</a> |
| Foxo3 (mmu) ⓘ   | mmu-miR-27a-3p ⓘ |  | 0.544<br><a href="#">(/DianaTools/index.php?r=microT_CDS/results&amp;keywords=mmu-miR-27a-3p%20ENSMUSG00000048756&amp;genes=ENSMUSG00000048756&amp;mirnas=mmu-miR-27a-3p&amp;threshold=0)</a> |

We have placed cookies on your device to help make this website and the services we offer better. By using this site, you agree to the use of cookies. [Learn more](#) ([/DianaTools/index.php?r=site/terms](#)).

I accept

|                       |                  |                                                                                      |                                                                                                                                                                                                                                                                                                                                                                                           |
|-----------------------|------------------|--------------------------------------------------------------------------------------|-------------------------------------------------------------------------------------------------------------------------------------------------------------------------------------------------------------------------------------------------------------------------------------------------------------------------------------------------------------------------------------------|
| Mtus1 (mmu) ⓘ         | mmu-miR-27a-3p ⓘ |    | 0.526<br><a href="(/DianaTools/index.php?r=microT_CDS/results&amp;keywords=mmu-miR-27a-3p%20ENSMUSG00000045636&amp;genes=ENSMUSG00000045636&amp;mirnas=mmu-miR-27a-3p&amp;threshold=0)">(/DianaTools/index.php?<br/>r=microT_CDS/results&amp;keywords=mmu-<br/>miR-27a-<br/>3p%20ENSMUSG00000045636&amp;genes=ENSMUSG00000045636&amp;mirnas=mmu-<br/>miR-27a-<br/>3p&amp;threshold=0)</a> |
| Usp14 (mmu) ⓘ         | mmu-miR-27a-3p ⓘ |    | 0.522<br><a href="(/DianaTools/index.php?r=microT_CDS/results&amp;keywords=mmu-miR-27a-3p%20ENSMUSG00000047879&amp;genes=ENSMUSG00000047879&amp;mirnas=mmu-miR-27a-3p&amp;threshold=0)">(/DianaTools/index.php?<br/>r=microT_CDS/results&amp;keywords=mmu-<br/>miR-27a-<br/>3p%20ENSMUSG00000047879&amp;genes=ENSMUSG00000047879&amp;mirnas=mmu-<br/>miR-27a-<br/>3p&amp;threshold=0)</a> |
| Sacs (mmu) ⓘ          | mmu-miR-27a-3p ⓘ |    | 0.515<br><a href="(/DianaTools/index.php?r=microT_CDS/results&amp;keywords=mmu-miR-27a-3p%20ENSMUSG00000048279&amp;genes=ENSMUSG00000048279&amp;mirnas=mmu-miR-27a-3p&amp;threshold=0)">(/DianaTools/index.php?<br/>r=microT_CDS/results&amp;keywords=mmu-<br/>miR-27a-<br/>3p%20ENSMUSG00000048279&amp;genes=ENSMUSG00000048279&amp;mirnas=mmu-<br/>miR-27a-<br/>3p&amp;threshold=0)</a> |
| Trrap (mmu) ⓘ         | mmu-miR-27a-3p ⓘ |    | 0.511<br><a href="(/DianaTools/index.php?r=microT_CDS/results&amp;keywords=mmu-miR-27a-3p%20ENSMUSG00000045482&amp;genes=ENSMUSG00000045482&amp;mirnas=mmu-miR-27a-3p&amp;threshold=0)">(/DianaTools/index.php?<br/>r=microT_CDS/results&amp;keywords=mmu-<br/>miR-27a-<br/>3p%20ENSMUSG00000045482&amp;genes=ENSMUSG00000045482&amp;mirnas=mmu-<br/>miR-27a-<br/>3p&amp;threshold=0)</a> |
| Amigo2 (mmu) ⓘ        | mmu-miR-27a-3p ⓘ |    | 0.504<br><a href="(/DianaTools/index.php?r=microT_CDS/results&amp;keywords=mmu-miR-27a-3p%20ENSMUSG00000048218&amp;genes=ENSMUSG00000048218&amp;mirnas=mmu-miR-27a-3p&amp;threshold=0)">(/DianaTools/index.php?<br/>r=microT_CDS/results&amp;keywords=mmu-<br/>miR-27a-<br/>3p%20ENSMUSG00000048218&amp;genes=ENSMUSG00000048218&amp;mirnas=mmu-<br/>miR-27a-<br/>3p&amp;threshold=0)</a> |
| Gimap6 (mmu) ⓘ        | mmu-miR-27a-3p ⓘ |    | 0.499<br><a href="(/DianaTools/index.php?r=microT_CDS/results&amp;keywords=mmu-miR-27a-3p%20ENSMUSG00000047867&amp;genes=ENSMUSG00000047867&amp;mirnas=mmu-miR-27a-3p&amp;threshold=0)">(/DianaTools/index.php?<br/>r=microT_CDS/results&amp;keywords=mmu-<br/>miR-27a-<br/>3p%20ENSMUSG00000047867&amp;genes=ENSMUSG00000047867&amp;mirnas=mmu-<br/>miR-27a-<br/>3p&amp;threshold=0)</a> |
| Tmem72 (mmu) ⓘ        | mmu-miR-27a-3p ⓘ |   | 0.479<br><a href="(/DianaTools/index.php?r=microT_CDS/results&amp;keywords=mmu-miR-27a-3p%20ENSMUSG00000048108&amp;genes=ENSMUSG00000048108&amp;mirnas=mmu-miR-27a-3p&amp;threshold=0)">(/DianaTools/index.php?<br/>r=microT_CDS/results&amp;keywords=mmu-<br/>miR-27a-<br/>3p%20ENSMUSG00000048108&amp;genes=ENSMUSG00000048108&amp;mirnas=mmu-<br/>miR-27a-<br/>3p&amp;threshold=0)</a> |
| 1810026J23Rik (mmu) ⓘ | mmu-miR-27a-3p ⓘ |  | 0.464<br><a href="(/DianaTools/index.php?r=microT_CDS/results&amp;keywords=mmu-miR-27a-3p%20ENSMUSG00000048429&amp;genes=ENSMUSG00000048429&amp;mirnas=mmu-miR-27a-3p&amp;threshold=0)">(/DianaTools/index.php?<br/>r=microT_CDS/results&amp;keywords=mmu-<br/>miR-27a-<br/>3p%20ENSMUSG00000048429&amp;genes=ENSMUSG00000048429&amp;mirnas=mmu-<br/>miR-27a-<br/>3p&amp;threshold=0)</a> |
| Zfp322a (mmu) ⓘ       | mmu-miR-27a-3p ⓘ |  | 0.460<br><a href="(/DianaTools/index.php?r=microT_CDS/results&amp;keywords=mmu-miR-27a-3p%20ENSMUSG00000046351&amp;genes=ENSMUSG00000046351&amp;mirnas=mmu-miR-27a-3p&amp;threshold=0)">(/DianaTools/index.php?<br/>r=microT_CDS/results&amp;keywords=mmu-<br/>miR-27a-<br/>3p%20ENSMUSG00000046351&amp;genes=ENSMUSG00000046351&amp;mirnas=mmu-<br/>miR-27a-<br/>3p&amp;threshold=0)</a> |
| Akap10 (mmu) ⓘ        | mmu-miR-27a-3p ⓘ |  | 0.458<br><a href="(/DianaTools/index.php?r=microT_CDS/results&amp;keywords=mmu-miR-27a-3p%20ENSMUSG00000047804&amp;genes=ENSMUSG00000047804&amp;mirnas=mmu-miR-27a-3p&amp;threshold=0)">(/DianaTools/index.php?<br/>r=microT_CDS/results&amp;keywords=mmu-<br/>miR-27a-<br/>3p%20ENSMUSG00000047804&amp;genes=ENSMUSG00000047804&amp;mirnas=mmu-<br/>miR-27a-<br/>3p&amp;threshold=0)</a> |
| Cltc (mmu) ⓘ          | mmu-miR-27a-3p ⓘ |  | 0.455<br><a href="(/DianaTools/index.php?r=microT_CDS/results&amp;keywords=mmu-miR-27a-3p%20ENSMUSG00000047126&amp;genes=ENSMUSG00000047126&amp;mirnas=mmu-miR-27a-3p&amp;threshold=0)">(/DianaTools/index.php?<br/>r=microT_CDS/results&amp;keywords=mmu-<br/>miR-27a-<br/>3p%20ENSMUSG00000047126&amp;genes=ENSMUSG00000047126&amp;mirnas=mmu-<br/>miR-27a-<br/>3p&amp;threshold=0)</a> |

We have placed cookies on your device to help make this website and the services we offer better. By using this site, you agree to the use of cookies. [Learn more](#) ([/DianaTools/index.php?r=site/terms]((/DianaTools/index.php?r=site/terms))).

I accept

|                       |                  |    |   |
|-----------------------|------------------|----|---|
| Mms22l (mmu) ⓘ        | mmu-miR-27a-3p ⓘ | IP | - |
| Wbp1l (mmu) ⓘ         | mmu-miR-27a-3p ⓘ | IP | - |
| Eif4g1 (mmu) ⓘ        | mmu-miR-27a-3p ⓘ | IP | - |
| Phf3 (mmu) ⓘ          | mmu-miR-27a-3p ⓘ | IP | - |
| Dpy19l4 (mmu) ⓘ       | mmu-miR-27a-3p ⓘ | IP | - |
| Setd2 (mmu) ⓘ         | mmu-miR-27a-3p ⓘ | IP | - |
| Arl4a (mmu) ⓘ         | mmu-miR-27a-3p ⓘ | IP | - |
| Tet1 (mmu) ⓘ          | mmu-miR-27a-3p ⓘ | IP | - |
| Sacs (mmu) ⓘ          | mmu-miR-27a-3p ⓘ | IP | - |
| Samd14 (mmu) ⓘ        | mmu-miR-27a-3p ⓘ | IP | - |
| Arid4a (mmu) ⓘ        | mmu-miR-27a-3p ⓘ | IP | - |
| 8030462N17Rik (mmu) ⓘ | mmu-miR-27a-3p ⓘ | IP | - |
| Ppp1r15b (mmu) ⓘ      | mmu-miR-27a-3p ⓘ | IP | - |
| Ppp1r15b (mmu) ⓘ      | mmu-miR-27a-3p ⓘ | IP | - |
| Selplg (mmu) ⓘ        | mmu-miR-27a-3p ⓘ | IP | - |
| Suv420h1 (mmu) ⓘ      | mmu-miR-27a-3p ⓘ | IP | - |
| Thtpa (mmu) ⓘ         | mmu-miR-27a-3p ⓘ | IP | - |
| F2r (mmu) ⓘ           | mmu-miR-27a-3p ⓘ | IP | - |
| Nwd1 (mmu) ⓘ          | mmu-miR-27a-3p ⓘ | IP | - |
| Rbm33 (mmu) ⓘ         | mmu-miR-27a-3p ⓘ | IP | - |
| Adrb2 (mmu) ⓘ         | mmu-miR-27a-3p ⓘ | IP | - |
| Stbd1 (mmu) ⓘ         | mmu-miR-27a-3p ⓘ | IP | - |
| Mrgpre (mmu) ⓘ        | mmu-miR-27a-3p ⓘ | IP | - |
| Chrm2 (mmu) ⓘ         | mmu-miR-27a-3p ⓘ | IP | - |
| Neur4 (mmu) ⓘ         | mmu-miR-27a-3p ⓘ | IP | - |
| Neur4 (mmu) ⓘ         | mmu-miR-27a-3p ⓘ | IP | - |
| Wnk1 (mmu) ⓘ          | mmu-miR-27a-3p ⓘ | IP | - |
| Wnk1 (mmu) ⓘ          | mmu-miR-27a-3p ⓘ | IP | - |
| Fam212b (mmu) ⓘ       | mmu-miR-27a-3p ⓘ | IP | - |
| Dip2c (mmu) ⓘ         | mmu-miR-27a-3p ⓘ | IP | - |
| Amer3 (mmu) ⓘ         | mmu-miR-27a-3p ⓘ | IP | - |
| Ermp1 (mmu) ⓘ         | mmu-miR-27a-3p ⓘ | IP | - |

We have placed cookies on your device to help make this website and the services we offer better. By using this site, you agree to the use of cookies. [Learn more \(/DianaTools/index.php?r=site/terms\)](#).

I accept



|                  |                  |                                                                                      |                                                                                                                                                                                                                                                                                                                                                                    |
|------------------|------------------|--------------------------------------------------------------------------------------|--------------------------------------------------------------------------------------------------------------------------------------------------------------------------------------------------------------------------------------------------------------------------------------------------------------------------------------------------------------------|
| Efna5 (mmu) ⓘ    | mmu-miR-27a-3p ⓘ |     | -                                                                                                                                                                                                                                                                                                                                                                  |
| Tmem60 (mmu) ⓘ   | mmu-miR-27a-3p ⓘ |    | -                                                                                                                                                                                                                                                                                                                                                                  |
| Irgm1 (mmu) ⓘ    | mmu-miR-27a-3p ⓘ |    | -                                                                                                                                                                                                                                                                                                                                                                  |
| Elf1 (mmu) ⓘ     | mmu-miR-27a-3p ⓘ |    | -                                                                                                                                                                                                                                                                                                                                                                  |
| Ythdf3 (mmu) ⓘ   | mmu-miR-27a-3p ⓘ |    | -                                                                                                                                                                                                                                                                                                                                                                  |
| B4galt3 (mmu) ⓘ  | mmu-miR-27a-3p ⓘ |    | 0.999<br><a href="(/DianaTools/index.php?r=microT_CDS/results&amp;keywords=mmu-miR-27a-3p%20ENSMUSG00000052423&amp;genes=ENSMUSG00000052423&amp;mirnas=mmu-miR-27a-3p&amp;threshold=0).">(/DianaTools/index.php?r=microT_CDS/results&amp;keywords=mmu-miR-27a-3p%20ENSMUSG00000052423&amp;genes=ENSMUSG00000052423&amp;mirnas=mmu-miR-27a-3p&amp;threshold=0).</a> |
| Sor1 (mmu) ⓘ     | mmu-miR-27a-3p ⓘ |    | 0.998<br><a href="(/DianaTools/index.php?r=microT_CDS/results&amp;keywords=mmu-miR-27a-3p%20ENSMUSG00000049313&amp;genes=ENSMUSG00000049313&amp;mirnas=mmu-miR-27a-3p&amp;threshold=0).">(/DianaTools/index.php?r=microT_CDS/results&amp;keywords=mmu-miR-27a-3p%20ENSMUSG00000049313&amp;genes=ENSMUSG00000049313&amp;mirnas=mmu-miR-27a-3p&amp;threshold=0).</a> |
| Arhgap20 (mmu) ⓘ | mmu-miR-27a-3p ⓘ |    | 0.988<br><a href="(/DianaTools/index.php?r=microT_CDS/results&amp;keywords=mmu-miR-27a-3p%20ENSMUSG00000053199&amp;genes=ENSMUSG00000053199&amp;mirnas=mmu-miR-27a-3p&amp;threshold=0).">(/DianaTools/index.php?r=microT_CDS/results&amp;keywords=mmu-miR-27a-3p%20ENSMUSG00000053199&amp;genes=ENSMUSG00000053199&amp;mirnas=mmu-miR-27a-3p&amp;threshold=0).</a> |
| Grm5 (mmu) ⓘ     | mmu-miR-27a-3p ⓘ |    | 0.980<br><a href="(/DianaTools/index.php?r=microT_CDS/results&amp;keywords=mmu-miR-27a-3p%20ENSMUSG00000049583&amp;genes=ENSMUSG00000049583&amp;mirnas=mmu-miR-27a-3p&amp;threshold=0).">(/DianaTools/index.php?r=microT_CDS/results&amp;keywords=mmu-miR-27a-3p%20ENSMUSG00000049583&amp;genes=ENSMUSG00000049583&amp;mirnas=mmu-miR-27a-3p&amp;threshold=0).</a> |
| Rbm12b2 (mmu) ⓘ  | mmu-miR-27a-3p ⓘ |    | 0.972<br><a href="(/DianaTools/index.php?r=microT_CDS/results&amp;keywords=mmu-miR-27a-3p%20ENSMUSG00000052137&amp;genes=ENSMUSG00000052137&amp;mirnas=mmu-miR-27a-3p&amp;threshold=0).">(/DianaTools/index.php?r=microT_CDS/results&amp;keywords=mmu-miR-27a-3p%20ENSMUSG00000052137&amp;genes=ENSMUSG00000052137&amp;mirnas=mmu-miR-27a-3p&amp;threshold=0).</a> |
| Acvr2a (mmu) ⓘ   | mmu-miR-27a-3p ⓘ |  | 0.961<br><a href="(/DianaTools/index.php?r=microT_CDS/results&amp;keywords=mmu-miR-27a-3p%20ENSMUSG00000052155&amp;genes=ENSMUSG00000052155&amp;mirnas=mmu-miR-27a-3p&amp;threshold=0).">(/DianaTools/index.php?r=microT_CDS/results&amp;keywords=mmu-miR-27a-3p%20ENSMUSG00000052155&amp;genes=ENSMUSG00000052155&amp;mirnas=mmu-miR-27a-3p&amp;threshold=0).</a> |
| Spty2d1 (mmu) ⓘ  | mmu-miR-27a-3p ⓘ |  | 0.956<br><a href="(/DianaTools/index.php?r=microT_CDS/results&amp;keywords=mmu-miR-27a-3p%20ENSMUSG00000049516&amp;genes=ENSMUSG00000049516&amp;mirnas=mmu-miR-27a-3p&amp;threshold=0).">(/DianaTools/index.php?r=microT_CDS/results&amp;keywords=mmu-miR-27a-3p%20ENSMUSG00000049516&amp;genes=ENSMUSG00000049516&amp;mirnas=mmu-miR-27a-3p&amp;threshold=0).</a> |
| Aff4 (mmu) ⓘ     | mmu-miR-27a-3p ⓘ |  | 0.954<br><a href="(/DianaTools/index.php?r=microT_CDS/results&amp;keywords=mmu-miR-27a-3p%20ENSMUSG00000049470&amp;genes=ENSMUSG00000049470&amp;mirnas=mmu-miR-27a-3p&amp;threshold=0).">(/DianaTools/index.php?r=microT_CDS/results&amp;keywords=mmu-miR-27a-3p%20ENSMUSG00000049470&amp;genes=ENSMUSG00000049470&amp;mirnas=mmu-miR-27a-3p&amp;threshold=0).</a> |
| Aff4 (mmu) ⓘ     | mmu-miR-27a-3p ⓘ |  | 0.954<br><a href="(/DianaTools/index.php?r=microT_CDS/results&amp;keywords=mmu-miR-27a-3p%20ENSMUSG00000049470&amp;genes=ENSMUSG00000049470&amp;mirnas=mmu-miR-27a-3p&amp;threshold=0).">(/DianaTools/index.php?r=microT_CDS/results&amp;keywords=mmu-miR-27a-3p%20ENSMUSG00000049470&amp;genes=ENSMUSG00000049470&amp;mirnas=mmu-miR-27a-3p&amp;threshold=0).</a> |

We have placed cookies on your device to help make this website and the services we offer better. By using this site, you agree to the use of cookies. [Learn more](#) ([\(/DianaTools/index.php?r=site/terms\)]((/DianaTools/index.php?r=site/terms).)).

I accept

|                 |                  |                                                                                      |                                                                                                                                                                                   |
|-----------------|------------------|--------------------------------------------------------------------------------------|-----------------------------------------------------------------------------------------------------------------------------------------------------------------------------------|
| Sudlg1 (mmu) ⓘ  | mmu-miR-27a-3p ⓘ |    | 0.944<br>(/DianaTools/index.php?<br>r=microT_CDS/results&keywords=mmu-<br>miR-27a-<br>3p%20ENSMUSG00000052738&genes=ENSMUSG00000052738&mirnas=mmu-<br>miR-27a-<br>3p&threshold=0) |
| Zfp608 (mmu) ⓘ  | mmu-miR-27a-3p ⓘ |    | 0.924<br>(/DianaTools/index.php?<br>r=microT_CDS/results&keywords=mmu-<br>miR-27a-<br>3p%20ENSMUSG00000052713&genes=ENSMUSG00000052713&mirnas=mmu-<br>miR-27a-<br>3p&threshold=0) |
| Nav2 (mmu) ⓘ    | mmu-miR-27a-3p ⓘ |    | 0.916<br>(/DianaTools/index.php?<br>r=microT_CDS/results&keywords=mmu-<br>miR-27a-<br>3p%20ENSMUSG00000052512&genes=ENSMUSG00000052512&mirnas=mmu-<br>miR-27a-<br>3p&threshold=0) |
| Nav2 (mmu) ⓘ    | mmu-miR-27a-3p ⓘ |    | 0.916<br>(/DianaTools/index.php?<br>r=microT_CDS/results&keywords=mmu-<br>miR-27a-<br>3p%20ENSMUSG00000052512&genes=ENSMUSG00000052512&mirnas=mmu-<br>miR-27a-<br>3p&threshold=0) |
| Rictor (mmu) ⓘ  | mmu-miR-27a-3p ⓘ |    | 0.914<br>(/DianaTools/index.php?<br>r=microT_CDS/results&keywords=mmu-<br>miR-27a-<br>3p%20ENSMUSG00000050310&genes=ENSMUSG00000050310&mirnas=mmu-<br>miR-27a-<br>3p&threshold=0) |
| Cemip (mmu) ⓘ   | mmu-miR-27a-3p ⓘ |    | 0.897<br>(/DianaTools/index.php?<br>r=microT_CDS/results&keywords=mmu-<br>miR-27a-<br>3p%20ENSMUSG00000052353&genes=ENSMUSG00000052353&mirnas=mmu-<br>miR-27a-<br>3p&threshold=0) |
| Arl4c (mmu) ⓘ   | mmu-miR-27a-3p ⓘ |   | 0.879<br>(/DianaTools/index.php?<br>r=microT_CDS/results&keywords=mmu-<br>miR-27a-<br>3p%20ENSMUSG00000049866&genes=ENSMUSG00000049866&mirnas=mmu-<br>miR-27a-<br>3p&threshold=0) |
| Ltn1 (mmu) ⓘ    | mmu-miR-27a-3p ⓘ |  | 0.868<br>(/DianaTools/index.php?<br>r=microT_CDS/results&keywords=mmu-<br>miR-27a-<br>3p%20ENSMUSG00000052299&genes=ENSMUSG00000052299&mirnas=mmu-<br>miR-27a-<br>3p&threshold=0) |
| Ltn1 (mmu) ⓘ    | mmu-miR-27a-3p ⓘ |  | 0.868<br>(/DianaTools/index.php?<br>r=microT_CDS/results&keywords=mmu-<br>miR-27a-<br>3p%20ENSMUSG00000052299&genes=ENSMUSG00000052299&mirnas=mmu-<br>miR-27a-<br>3p&threshold=0) |
| Zfp280b (mmu) ⓘ | mmu-miR-27a-3p ⓘ |  | 0.831<br>(/DianaTools/index.php?<br>r=microT_CDS/results&keywords=mmu-<br>miR-27a-<br>3p%20ENSMUSG00000049764&genes=ENSMUSG00000049764&mirnas=mmu-<br>miR-27a-<br>3p&threshold=0) |
| Zfp280b (mmu) ⓘ | mmu-miR-27a-3p ⓘ |  | 0.831<br>(/DianaTools/index.php?<br>r=microT_CDS/results&keywords=mmu-<br>miR-27a-<br>3p%20ENSMUSG00000049764&genes=ENSMUSG00000049764&mirnas=mmu-<br>miR-27a-<br>3p&threshold=0) |

We have placed cookies on your device to help make this website and the services we offer better. By using this site, you agree to the use of cookies. [Learn more](#) (</DianaTools/index.php?r=site/terms>).

I accept

|                 |                  |                                                                                      |                                                                                                                                                                                               |
|-----------------|------------------|--------------------------------------------------------------------------------------|-----------------------------------------------------------------------------------------------------------------------------------------------------------------------------------------------|
| Rap1b (mmu) ⓘ   | mmu-miR-27a-3p ⓘ |    | 0.795<br><a href="#">(/DianaTools/index.php?r=microT_CDS/results&amp;keywords=mmu-miR-27a-3p%20ENSMUSG00000052681&amp;genes=ENSMUSG00000052681&amp;mirnas=mmu-miR-27a-3p&amp;threshold=0)</a> |
| Scn3b (mmu) ⓘ   | mmu-miR-27a-3p ⓘ |    | 0.755<br><a href="#">(/DianaTools/index.php?r=microT_CDS/results&amp;keywords=mmu-miR-27a-3p%20ENSMUSG00000049281&amp;genes=ENSMUSG00000049281&amp;mirnas=mmu-miR-27a-3p&amp;threshold=0)</a> |
| C1ql3 (mmu) ⓘ   | mmu-miR-27a-3p ⓘ |    | 0.719<br><a href="#">(/DianaTools/index.php?r=microT_CDS/results&amp;keywords=mmu-miR-27a-3p%20ENSMUSG00000049630&amp;genes=ENSMUSG00000049630&amp;mirnas=mmu-miR-27a-3p&amp;threshold=0)</a> |
| Tmem123 (mmu) ⓘ | mmu-miR-27a-3p ⓘ |    | 0.714<br><a href="#">(/DianaTools/index.php?r=microT_CDS/results&amp;keywords=mmu-miR-27a-3p%20ENSMUSG00000050912&amp;genes=ENSMUSG00000050912&amp;mirnas=mmu-miR-27a-3p&amp;threshold=0)</a> |
| Grem2 (mmu) ⓘ   | mmu-miR-27a-3p ⓘ |    | 0.711<br><a href="#">(/DianaTools/index.php?r=microT_CDS/results&amp;keywords=mmu-miR-27a-3p%20ENSMUSG00000050069&amp;genes=ENSMUSG00000050069&amp;mirnas=mmu-miR-27a-3p&amp;threshold=0)</a> |
| Zfp644 (mmu) ⓘ  | mmu-miR-27a-3p ⓘ |    | 0.686<br><a href="#">(/DianaTools/index.php?r=microT_CDS/results&amp;keywords=mmu-miR-27a-3p%20ENSMUSG00000049606&amp;genes=ENSMUSG00000049606&amp;mirnas=mmu-miR-27a-3p&amp;threshold=0)</a> |
| Adnp (mmu) ⓘ    | mmu-miR-27a-3p ⓘ |   | 0.670<br><a href="#">(/DianaTools/index.php?r=microT_CDS/results&amp;keywords=mmu-miR-27a-3p%20ENSMUSG00000051149&amp;genes=ENSMUSG00000051149&amp;mirnas=mmu-miR-27a-3p&amp;threshold=0)</a> |
| Spn (mmu) ⓘ     | mmu-miR-27a-3p ⓘ |  | 0.669<br><a href="#">(/DianaTools/index.php?r=microT_CDS/results&amp;keywords=mmu-miR-27a-3p%20ENSMUSG00000051457&amp;genes=ENSMUSG00000051457&amp;mirnas=mmu-miR-27a-3p&amp;threshold=0)</a> |
| Kcnf1 (mmu) ⓘ   | mmu-miR-27a-3p ⓘ |  | 0.660<br><a href="#">(/DianaTools/index.php?r=microT_CDS/results&amp;keywords=mmu-miR-27a-3p%20ENSMUSG00000051726&amp;genes=ENSMUSG00000051726&amp;mirnas=mmu-miR-27a-3p&amp;threshold=0)</a> |
| Dcaf7 (mmu) ⓘ   | mmu-miR-27a-3p ⓘ |  | 0.648<br><a href="#">(/DianaTools/index.php?r=microT_CDS/results&amp;keywords=mmu-miR-27a-3p%20ENSMUSG00000049354&amp;genes=ENSMUSG00000049354&amp;mirnas=mmu-miR-27a-3p&amp;threshold=0)</a> |
| Dcaf7 (mmu) ⓘ   | mmu-miR-27a-3p ⓘ |  | 0.648<br><a href="#">(/DianaTools/index.php?r=microT_CDS/results&amp;keywords=mmu-miR-27a-3p%20ENSMUSG00000049354&amp;genes=ENSMUSG00000049354&amp;mirnas=mmu-miR-27a-3p&amp;threshold=0)</a> |

We have placed cookies on your device to help make this website and the services we offer better. By using this site, you agree to the use of cookies. [Learn more](#) ([/DianaTools/index.php?r=site/terms](#)).

I accept

|                 |                  |                                                                                      |                                                                                                                                                                                               |
|-----------------|------------------|--------------------------------------------------------------------------------------|-----------------------------------------------------------------------------------------------------------------------------------------------------------------------------------------------|
| Zfp518a (mmu) ⓘ | mmu-miR-27a-3p ⓘ |    | 0.645<br><a href="#">(/DianaTools/index.php?r=microT_CDS/results&amp;keywords=mmu-miR-27a-3p%20ENSMUSG00000049164&amp;genes=ENSMUSG00000049164&amp;mirnas=mmu-miR-27a-3p&amp;threshold=0)</a> |
| Zfp518a (mmu) ⓘ | mmu-miR-27a-3p ⓘ |    | 0.645<br><a href="#">(/DianaTools/index.php?r=microT_CDS/results&amp;keywords=mmu-miR-27a-3p%20ENSMUSG00000049164&amp;genes=ENSMUSG00000049164&amp;mirnas=mmu-miR-27a-3p&amp;threshold=0)</a> |
| Zfp697 (mmu) ⓘ  | mmu-miR-27a-3p ⓘ |    | 0.621<br><a href="#">(/DianaTools/index.php?r=microT_CDS/results&amp;keywords=mmu-miR-27a-3p%20ENSMUSG00000050064&amp;genes=ENSMUSG00000050064&amp;mirnas=mmu-miR-27a-3p&amp;threshold=0)</a> |
| Lax1 (mmu) ⓘ    | mmu-miR-27a-3p ⓘ |    | 0.613<br><a href="#">(/DianaTools/index.php?r=microT_CDS/results&amp;keywords=mmu-miR-27a-3p%20ENSMUSG00000051998&amp;genes=ENSMUSG00000051998&amp;mirnas=mmu-miR-27a-3p&amp;threshold=0)</a> |
| Zfp217 (mmu) ⓘ  | mmu-miR-27a-3p ⓘ |    | 0.610<br><a href="#">(/DianaTools/index.php?r=microT_CDS/results&amp;keywords=mmu-miR-27a-3p%20ENSMUSG00000052056&amp;genes=ENSMUSG00000052056&amp;mirnas=mmu-miR-27a-3p&amp;threshold=0)</a> |
| Map1b (mmu) ⓘ   | mmu-miR-27a-3p ⓘ |    | 0.602<br><a href="#">(/DianaTools/index.php?r=microT_CDS/results&amp;keywords=mmu-miR-27a-3p%20ENSMUSG00000052727&amp;genes=ENSMUSG00000052727&amp;mirnas=mmu-miR-27a-3p&amp;threshold=0)</a> |
| Gfod1 (mmu) ⓘ   | mmu-miR-27a-3p ⓘ |   | 0.587<br><a href="#">(/DianaTools/index.php?r=microT_CDS/results&amp;keywords=mmu-miR-27a-3p%20ENSMUSG00000051335&amp;genes=ENSMUSG00000051335&amp;mirnas=mmu-miR-27a-3p&amp;threshold=0)</a> |
| Dcaf5 (mmu) ⓘ   | mmu-miR-27a-3p ⓘ |  | 0.577<br><a href="#">(/DianaTools/index.php?r=microT_CDS/results&amp;keywords=mmu-miR-27a-3p%20ENSMUSG00000049106&amp;genes=ENSMUSG00000049106&amp;mirnas=mmu-miR-27a-3p&amp;threshold=0)</a> |
| Swf1 (mmu) ⓘ    | mmu-miR-27a-3p ⓘ |  | 0.574<br><a href="#">(/DianaTools/index.php?r=microT_CDS/results&amp;keywords=mmu-miR-27a-3p%20ENSMUSG00000052748&amp;genes=ENSMUSG00000052748&amp;mirnas=mmu-miR-27a-3p&amp;threshold=0)</a> |
| Tnrc6a (mmu) ⓘ  | mmu-miR-27a-3p ⓘ |  | 0.572<br><a href="#">(/DianaTools/index.php?r=microT_CDS/results&amp;keywords=mmu-miR-27a-3p%20ENSMUSG00000052707&amp;genes=ENSMUSG00000052707&amp;mirnas=mmu-miR-27a-3p&amp;threshold=0)</a> |
| Tnrc6a (mmu) ⓘ  | mmu-miR-27a-3p ⓘ |  | 0.572<br><a href="#">(/DianaTools/index.php?r=microT_CDS/results&amp;keywords=mmu-miR-27a-3p%20ENSMUSG00000052707&amp;genes=ENSMUSG00000052707&amp;mirnas=mmu-miR-27a-3p&amp;threshold=0)</a> |

We have placed cookies on your device to help make this website and the services we offer better. By using this site, you agree to the use of cookies. [Learn more](#) ([/DianaTools/index.php?r=site/terms](#)).

I accept

|                  |                  |                                                                                      |                                                                                                                                                                                                                                                                                                                                                                    |
|------------------|------------------|--------------------------------------------------------------------------------------|--------------------------------------------------------------------------------------------------------------------------------------------------------------------------------------------------------------------------------------------------------------------------------------------------------------------------------------------------------------------|
| Tmem199 (mmu) ⓘ  | mmu-miR-27a-3p ⓘ |    | 0.565<br><a href="/DianaTools/index.php?r=microT_CDS/results&amp;keywords=mmu-miR-27a-3p%20ENSMUSG000000051232&amp;genes=ENSMUSG000000051232&amp;mirnas=mmu-miR-27a-3p&amp;threshold=0">(/DianaTools/index.php?r=microT_CDS/results&amp;keywords=mmu-miR-27a-3p%20ENSMUSG000000051232&amp;genes=ENSMUSG000000051232&amp;mirnas=mmu-miR-27a-3p&amp;threshold=0)</a> |
| Plcb1 (mmu) ⓘ    | mmu-miR-27a-3p ⓘ |    | 0.562<br><a href="/DianaTools/index.php?r=microT_CDS/results&amp;keywords=mmu-miR-27a-3p%20ENSMUSG000000051177&amp;genes=ENSMUSG000000051177&amp;mirnas=mmu-miR-27a-3p&amp;threshold=0">(/DianaTools/index.php?r=microT_CDS/results&amp;keywords=mmu-miR-27a-3p%20ENSMUSG000000051177&amp;genes=ENSMUSG000000051177&amp;mirnas=mmu-miR-27a-3p&amp;threshold=0)</a> |
| Tdrp (mmu) ⓘ     | mmu-miR-27a-3p ⓘ |    | 0.558<br><a href="/DianaTools/index.php?r=microT_CDS/results&amp;keywords=mmu-miR-27a-3p%20ENSMUSG000000050052&amp;genes=ENSMUSG000000050052&amp;mirnas=mmu-miR-27a-3p&amp;threshold=0">(/DianaTools/index.php?r=microT_CDS/results&amp;keywords=mmu-miR-27a-3p%20ENSMUSG000000050052&amp;genes=ENSMUSG000000050052&amp;mirnas=mmu-miR-27a-3p&amp;threshold=0)</a> |
| Arf3 (mmu) ⓘ     | mmu-miR-27a-3p ⓘ |    | 0.537<br><a href="/DianaTools/index.php?r=microT_CDS/results&amp;keywords=mmu-miR-27a-3p%20ENSMUSG000000051853&amp;genes=ENSMUSG000000051853&amp;mirnas=mmu-miR-27a-3p&amp;threshold=0">(/DianaTools/index.php?r=microT_CDS/results&amp;keywords=mmu-miR-27a-3p%20ENSMUSG000000051853&amp;genes=ENSMUSG000000051853&amp;mirnas=mmu-miR-27a-3p&amp;threshold=0)</a> |
| Arf3 (mmu) ⓘ     | mmu-miR-27a-3p ⓘ |    | 0.537<br><a href="/DianaTools/index.php?r=microT_CDS/results&amp;keywords=mmu-miR-27a-3p%20ENSMUSG000000051853&amp;genes=ENSMUSG000000051853&amp;mirnas=mmu-miR-27a-3p&amp;threshold=0">(/DianaTools/index.php?r=microT_CDS/results&amp;keywords=mmu-miR-27a-3p%20ENSMUSG000000051853&amp;genes=ENSMUSG000000051853&amp;mirnas=mmu-miR-27a-3p&amp;threshold=0)</a> |
| Prkca (mmu) ⓘ    | mmu-miR-27a-3p ⓘ |    | 0.532<br><a href="/DianaTools/index.php?r=microT_CDS/results&amp;keywords=mmu-miR-27a-3p%20ENSMUSG000000050965&amp;genes=ENSMUSG000000050965&amp;mirnas=mmu-miR-27a-3p&amp;threshold=0">(/DianaTools/index.php?r=microT_CDS/results&amp;keywords=mmu-miR-27a-3p%20ENSMUSG000000050965&amp;genes=ENSMUSG000000050965&amp;mirnas=mmu-miR-27a-3p&amp;threshold=0)</a> |
| Prkca (mmu) ⓘ    | mmu-miR-27a-3p ⓘ |    | 0.532<br><a href="/DianaTools/index.php?r=microT_CDS/results&amp;keywords=mmu-miR-27a-3p%20ENSMUSG000000050965&amp;genes=ENSMUSG000000050965&amp;mirnas=mmu-miR-27a-3p&amp;threshold=0">(/DianaTools/index.php?r=microT_CDS/results&amp;keywords=mmu-miR-27a-3p%20ENSMUSG000000050965&amp;genes=ENSMUSG000000050965&amp;mirnas=mmu-miR-27a-3p&amp;threshold=0)</a> |
| Fam110b (mmu) ⓘ  | mmu-miR-27a-3p ⓘ |  | 0.519<br><a href="/DianaTools/index.php?r=microT_CDS/results&amp;keywords=mmu-miR-27a-3p%20ENSMUSG000000049119&amp;genes=ENSMUSG000000049119&amp;mirnas=mmu-miR-27a-3p&amp;threshold=0">(/DianaTools/index.php?r=microT_CDS/results&amp;keywords=mmu-miR-27a-3p%20ENSMUSG000000049119&amp;genes=ENSMUSG000000049119&amp;mirnas=mmu-miR-27a-3p&amp;threshold=0)</a> |
| Cdc42se2 (mmu) ⓘ | mmu-miR-27a-3p ⓘ |  | 0.518<br><a href="/DianaTools/index.php?r=microT_CDS/results&amp;keywords=mmu-miR-27a-3p%20ENSMUSG000000052298&amp;genes=ENSMUSG000000052298&amp;mirnas=mmu-miR-27a-3p&amp;threshold=0">(/DianaTools/index.php?r=microT_CDS/results&amp;keywords=mmu-miR-27a-3p%20ENSMUSG000000052298&amp;genes=ENSMUSG000000052298&amp;mirnas=mmu-miR-27a-3p&amp;threshold=0)</a> |
| Irf2bp2 (mmu) ⓘ  | mmu-miR-27a-3p ⓘ |  | 0.508<br><a href="/DianaTools/index.php?r=microT_CDS/results&amp;keywords=mmu-miR-27a-3p%20ENSMUSG000000051495&amp;genes=ENSMUSG000000051495">(/DianaTools/index.php?r=microT_CDS/results&amp;keywords=mmu-miR-27a-3p%20ENSMUSG000000051495&amp;genes=ENSMUSG000000051495)</a>                                                                                     |
| Tbc1d30 (mmu) ⓘ  | mmu-miR-27a-3p ⓘ |  | 0.507<br><a href="/DianaTools/index.php?r=microT_CDS/results&amp;keywords=mmu-miR-27a-3p%20ENSMUSG000000052302&amp;genes=ENSMUSG000000052302&amp;mirnas=mmu-miR-27a-3p&amp;threshold=0">(/DianaTools/index.php?r=microT_CDS/results&amp;keywords=mmu-miR-27a-3p%20ENSMUSG000000052302&amp;genes=ENSMUSG000000052302&amp;mirnas=mmu-miR-27a-3p&amp;threshold=0)</a> |

We have placed cookies on your device to help make this website and the services we offer better. By using this site, you agree to the use of cookies. [Learn more](#) (</DianaTools/index.php?r=site/terms>).

I accept

|                  |                  |                                                                                      |                                                                                                                                                                                                                                                                                                                                                              |
|------------------|------------------|--------------------------------------------------------------------------------------|--------------------------------------------------------------------------------------------------------------------------------------------------------------------------------------------------------------------------------------------------------------------------------------------------------------------------------------------------------------|
| Jagn1 (mmu) ⓘ    | mmu-miR-27a-3p ⓘ |    | 0.503<br><a href="/DianaTools/index.php?r=miroT_CDS/results&amp;keywords=mmu-miR-27a-3p%20ENSMUSG00000051256&amp;genes=ENSMUSG00000051256&amp;mirnas=mmu-miR-27a-3p&amp;threshold=0">(/DianaTools/index.php?r=miroT_CDS/results&amp;keywords=mmu-miR-27a-3p%20ENSMUSG00000051256&amp;genes=ENSMUSG00000051256&amp;mirnas=mmu-miR-27a-3p&amp;threshold=0)</a> |
| Zfp11 (mmu) ⓘ    | mmu-miR-27a-3p ⓘ |    | 0.502<br><a href="/DianaTools/index.php?r=miroT_CDS/results&amp;keywords=mmu-miR-27a-3p%20ENSMUSG00000051034&amp;genes=ENSMUSG00000051034&amp;mirnas=mmu-miR-27a-3p&amp;threshold=0">(/DianaTools/index.php?r=miroT_CDS/results&amp;keywords=mmu-miR-27a-3p%20ENSMUSG00000051034&amp;genes=ENSMUSG00000051034&amp;mirnas=mmu-miR-27a-3p&amp;threshold=0)</a> |
| Cdh20 (mmu) ⓘ    | mmu-miR-27a-3p ⓘ |    | 0.490<br><a href="/DianaTools/index.php?r=miroT_CDS/results&amp;keywords=mmu-miR-27a-3p%20ENSMUSG00000050840&amp;genes=ENSMUSG00000050840&amp;mirnas=mmu-miR-27a-3p&amp;threshold=0">(/DianaTools/index.php?r=miroT_CDS/results&amp;keywords=mmu-miR-27a-3p%20ENSMUSG00000050840&amp;genes=ENSMUSG00000050840&amp;mirnas=mmu-miR-27a-3p&amp;threshold=0)</a> |
| Minos1 (mmu) ⓘ   | mmu-miR-27a-3p ⓘ |    | 0.481<br><a href="/DianaTools/index.php?r=miroT_CDS/results&amp;keywords=mmu-miR-27a-3p%20ENSMUSG00000050608&amp;genes=ENSMUSG00000050608&amp;mirnas=mmu-miR-27a-3p&amp;threshold=0">(/DianaTools/index.php?r=miroT_CDS/results&amp;keywords=mmu-miR-27a-3p%20ENSMUSG00000050608&amp;genes=ENSMUSG00000050608&amp;mirnas=mmu-miR-27a-3p&amp;threshold=0)</a> |
| Pgrmc2 (mmu) ⓘ   | mmu-miR-27a-3p ⓘ |    | 0.480<br><a href="/DianaTools/index.php?r=miroT_CDS/results&amp;keywords=mmu-miR-27a-3p%20ENSMUSG00000049940&amp;genes=ENSMUSG00000049940&amp;mirnas=mmu-miR-27a-3p&amp;threshold=0">(/DianaTools/index.php?r=miroT_CDS/results&amp;keywords=mmu-miR-27a-3p%20ENSMUSG00000049940&amp;genes=ENSMUSG00000049940&amp;mirnas=mmu-miR-27a-3p&amp;threshold=0)</a> |
| Pgrmc2 (mmu) ⓘ   | mmu-miR-27a-3p ⓘ |    | 0.480<br><a href="/DianaTools/index.php?r=miroT_CDS/results&amp;keywords=mmu-miR-27a-3p%20ENSMUSG00000049940&amp;genes=ENSMUSG00000049940&amp;mirnas=mmu-miR-27a-3p&amp;threshold=0">(/DianaTools/index.php?r=miroT_CDS/results&amp;keywords=mmu-miR-27a-3p%20ENSMUSG00000049940&amp;genes=ENSMUSG00000049940&amp;mirnas=mmu-miR-27a-3p&amp;threshold=0)</a> |
| Atp6v1a (mmu) ⓘ  | mmu-miR-27a-3p ⓘ |    | 0.479<br><a href="/DianaTools/index.php?r=miroT_CDS/results&amp;keywords=mmu-miR-27a-3p%20ENSMUSG00000052459&amp;genes=ENSMUSG00000052459&amp;mirnas=mmu-miR-27a-3p&amp;threshold=0">(/DianaTools/index.php?r=miroT_CDS/results&amp;keywords=mmu-miR-27a-3p%20ENSMUSG00000052459&amp;genes=ENSMUSG00000052459&amp;mirnas=mmu-miR-27a-3p&amp;threshold=0)</a> |
| Hist1h1d (mmu) ⓘ | mmu-miR-27a-3p ⓘ |  | 0.478<br><a href="/DianaTools/index.php?r=miroT_CDS/results&amp;keywords=mmu-miR-27a-3p%20ENSMUSG00000052565&amp;genes=ENSMUSG00000052565&amp;mirnas=mmu-miR-27a-3p&amp;threshold=0">(/DianaTools/index.php?r=miroT_CDS/results&amp;keywords=mmu-miR-27a-3p%20ENSMUSG00000052565&amp;genes=ENSMUSG00000052565&amp;mirnas=mmu-miR-27a-3p&amp;threshold=0)</a> |
| Mest (mmu) ⓘ     | mmu-miR-27a-3p ⓘ |  | 0.459<br><a href="/DianaTools/index.php?r=miroT_CDS/results&amp;keywords=mmu-miR-27a-3p%20ENSMUSG00000051855&amp;genes=ENSMUSG00000051855&amp;mirnas=mmu-miR-27a-3p&amp;threshold=0">(/DianaTools/index.php?r=miroT_CDS/results&amp;keywords=mmu-miR-27a-3p%20ENSMUSG00000051855&amp;genes=ENSMUSG00000051855&amp;mirnas=mmu-miR-27a-3p&amp;threshold=0)</a> |
| Plekhf2 (mmu) ⓘ  | mmu-miR-27a-3p ⓘ |  | 0.459<br><a href="/DianaTools/index.php?r=miroT_CDS/results&amp;keywords=mmu-miR-27a-3p%20ENSMUSG00000049969&amp;genes=ENSMUSG00000049969&amp;mirnas=mmu-miR-27a-3p&amp;threshold=0">(/DianaTools/index.php?r=miroT_CDS/results&amp;keywords=mmu-miR-27a-3p%20ENSMUSG00000049969&amp;genes=ENSMUSG00000049969&amp;mirnas=mmu-miR-27a-3p&amp;threshold=0)</a> |
| Btla (mmu) ⓘ     | mmu-miR-27a-3p ⓘ |  | -                                                                                                                                                                                                                                                                                                                                                            |
| Ankrd44 (mmu) ⓘ  | mmu-miR-27a-3p ⓘ |  | -                                                                                                                                                                                                                                                                                                                                                            |
| Sucg1 (mmu) ⓘ    | mmu-miR-27a-3p ⓘ |  | -                                                                                                                                                                                                                                                                                                                                                            |

We have placed cookies on your device to help make this website and the services we offer better. By using this site, you agree to the use of cookies. [Learn more \(/DianaTools/index.php?r=site/terms\)](/DianaTools/index.php?r=site/terms)

I accept

|                       |                  |    |   |
|-----------------------|------------------|----|---|
| Zfp52 (mmu) ⓘ         | mmu-miR-27a-3p ⓘ | IP | - |
| 2310061I04Rik (mmu) ⓘ | mmu-miR-27a-3p ⓘ | IP | - |
| Zfp219 (mmu) ⓘ        | mmu-miR-27a-3p ⓘ | IP | - |
| Aftph (mmu) ⓘ         | mmu-miR-27a-3p ⓘ | IP | - |
| Arhgap15 (mmu) ⓘ      | mmu-miR-27a-3p ⓘ | IP | - |
| Arhgap15 (mmu) ⓘ      | mmu-miR-27a-3p ⓘ | IP | - |
| Prmt6 (mmu) ⓘ         | mmu-miR-27a-3p ⓘ | IP | - |
| 1600012H06Rik (mmu) ⓘ | mmu-miR-27a-3p ⓘ | IP | - |
| Tmem123 (mmu) ⓘ       | mmu-miR-27a-3p ⓘ | IP | - |
| Kcnb1 (mmu) ⓘ         | mmu-miR-27a-3p ⓘ | IP | - |
| Gpr171 (mmu) ⓘ        | mmu-miR-27a-3p ⓘ | IP | - |
| Ube2ql1 (mmu) ⓘ       | mmu-miR-27a-3p ⓘ | IP | - |
| Plagl2 (mmu) ⓘ        | mmu-miR-27a-3p ⓘ | IP | - |
| Cyp8b1 (mmu) ⓘ        | mmu-miR-27a-3p ⓘ | IP | - |
| Klf13 (mmu) ⓘ         | mmu-miR-27a-3p ⓘ | IP | - |
| Cdc42ep1 (mmu) ⓘ      | mmu-miR-27a-3p ⓘ | IP | - |
| Epha3 (mmu) ⓘ         | mmu-miR-27a-3p ⓘ | IP | - |
| Brsk2 (mmu) ⓘ         | mmu-miR-27a-3p ⓘ | IP | - |
| Gprc5c (mmu) ⓘ        | mmu-miR-27a-3p ⓘ | IP | - |
| Gpr183 (mmu) ⓘ        | mmu-miR-27a-3p ⓘ | IP | - |
| Acap2 (mmu) ⓘ         | mmu-miR-27a-3p ⓘ | IP | - |
| Hbb-bs (mmu) ⓘ        | mmu-miR-27a-3p ⓘ | IP | - |
| Ap5b1 (mmu) ⓘ         | mmu-miR-27a-3p ⓘ | IP | - |
| Pcmt1 (mmu) ⓘ         | mmu-miR-27a-3p ⓘ | IP | - |
| Cyp2f2 (mmu) ⓘ        | mmu-miR-27a-3p ⓘ | IP | - |
| Zfp260 (mmu) ⓘ        | mmu-miR-27a-3p ⓘ | IP | - |
| Junb (mmu) ⓘ          | mmu-miR-27a-3p ⓘ | IP | - |
| 2900026A02Rik (mmu) ⓘ | mmu-miR-27a-3p ⓘ | IP | - |
| Prkcb (mmu) ⓘ         | mmu-miR-27a-3p ⓘ | IP | - |
| Pbx1 (mmu) ⓘ          | mmu-miR-27a-3p ⓘ | IP | - |
| Dcun1d4 (mmu) ⓘ       | mmu-miR-27a-3p ⓘ | IP | - |
| 5730508B09Rik (mmu) ⓘ | mmu-miR-27a-3p ⓘ | IP | - |

We have placed cookies on your device to help make this website and the services we offer better. By using this site, you agree to the use of cookies. [Learn more \(/DianaTools/index.php?r=site/terms\)](#).

I accept

|                  |                  |    |                                                                                                                                                                                               |
|------------------|------------------|----|-----------------------------------------------------------------------------------------------------------------------------------------------------------------------------------------------|
| Lrrc4c (mmu) ⓘ   | mmu-miR-27a-3p ⓘ | IP | -                                                                                                                                                                                             |
| Fam171a1 (mmu) ⓘ | mmu-miR-27a-3p ⓘ | IP | -                                                                                                                                                                                             |
| Car10 (mmu) ⓘ    | mmu-miR-27a-3p ⓘ | IP | 0.998<br><a href="#">(/DianaTools/index.php?r=microT_CDS/results&amp;keywords=mmu-miR-27a-3p%20ENSMUSG00000056158&amp;genes=ENSMUSG00000056158&amp;mirnas=mmu-miR-27a-3p&amp;threshold=0)</a> |
| Lifr (mmu) ⓘ     | mmu-miR-27a-3p ⓘ | IP | 0.995<br><a href="#">(/DianaTools/index.php?r=microT_CDS/results&amp;keywords=mmu-miR-27a-3p%20ENSMUSG00000054263&amp;genes=ENSMUSG00000054263&amp;mirnas=mmu-miR-27a-3p&amp;threshold=0)</a> |
| Lifr (mmu) ⓘ     | mmu-miR-27a-3p ⓘ | IP | 0.995<br><a href="#">(/DianaTools/index.php?r=microT_CDS/results&amp;keywords=mmu-miR-27a-3p%20ENSMUSG00000054263&amp;genes=ENSMUSG00000054263&amp;mirnas=mmu-miR-27a-3p&amp;threshold=0)</a> |
| Nyap2 (mmu) ⓘ    | mmu-miR-27a-3p ⓘ | IP | 0.991<br><a href="#">(/DianaTools/index.php?r=microT_CDS/results&amp;keywords=mmu-miR-27a-3p%20ENSMUSG00000054976&amp;genes=ENSMUSG00000054976&amp;mirnas=mmu-miR-27a-3p&amp;threshold=0)</a> |
| Ntrk2 (mmu) ⓘ    | mmu-miR-27a-3p ⓘ | IP | 0.986<br><a href="#">(/DianaTools/index.php?r=microT_CDS/results&amp;keywords=mmu-miR-27a-3p%20ENSMUSG00000055254&amp;genes=ENSMUSG00000055254&amp;mirnas=mmu-miR-27a-3p&amp;threshold=0)</a> |
| Zcchc24 (mmu) ⓘ  | mmu-miR-27a-3p ⓘ | IP | 0.984<br><a href="#">(/DianaTools/index.php?r=microT_CDS/results&amp;keywords=mmu-miR-27a-3p%20ENSMUSG00000055538&amp;genes=ENSMUSG00000055538&amp;mirnas=mmu-miR-27a-3p&amp;threshold=0)</a> |
| Fut9 (mmu) ⓘ     | mmu-miR-27a-3p ⓘ | IP | 0.950<br><a href="#">(/DianaTools/index.php?r=microT_CDS/results&amp;keywords=mmu-miR-27a-3p%20ENSMUSG00000055373&amp;genes=ENSMUSG00000055373&amp;mirnas=mmu-miR-27a-3p&amp;threshold=0)</a> |
| Slc35f3 (mmu) ⓘ  | mmu-miR-27a-3p ⓘ | IP | 0.945<br><a href="#">(/DianaTools/index.php?r=microT_CDS/results&amp;keywords=mmu-miR-27a-3p%20ENSMUSG00000057060&amp;genes=ENSMUSG00000057060&amp;mirnas=mmu-miR-27a-3p&amp;threshold=0)</a> |
| Whsc111 (mmu) ⓘ  | mmu-miR-27a-3p ⓘ | IP | 0.936<br><a href="#">(/DianaTools/index.php?r=microT_CDS/results&amp;keywords=mmu-miR-27a-3p%20ENSMUSG00000054823&amp;genes=ENSMUSG00000054823&amp;mirnas=mmu-miR-27a-3p&amp;threshold=0)</a> |
| Tead1 (mmu) ⓘ    | mmu-miR-27a-3p ⓘ | IP | 0.931<br><a href="#">(/DianaTools/index.php?r=microT_CDS/results&amp;keywords=mmu-miR-27a-3p%20ENSMUSG00000055320&amp;genes=ENSMUSG00000055320&amp;mirnas=mmu-miR-27a-3p&amp;threshold=0)</a> |

We have placed cookies on your device to help make this website and the services we offer better. By using this site, you agree to the use of cookies. [Learn more](#) ([/DianaTools/index.php?r=site/terms](#)).

I accept



|                |                  |                                                                                      |                                                                                                                                                                                                                        |
|----------------|------------------|--------------------------------------------------------------------------------------|------------------------------------------------------------------------------------------------------------------------------------------------------------------------------------------------------------------------|
| Socs6 (mmu) ⓘ  | mmu-miR-27a-3p ⓘ |    | <p><a href="#">0.921</a><br/> <a href="#">(/DianaTools/index.php?r=microT_CDS/results&amp;keywords=mmu-miR-27a-3p%20ENSMUSG00000056153&amp;genes=ENSMUSG00000056153&amp;mirnas=mmu-miR-27a-3p&amp;threshold=0)</a></p> |
| Sept11 (mmu) ⓘ | mmu-miR-27a-3p ⓘ |    | <p><a href="#">0.870</a><br/> <a href="#">(/DianaTools/index.php?r=microT_CDS/results&amp;keywords=mmu-miR-27a-3p%20ENSMUSG00000058013&amp;genes=ENSMUSG00000058013&amp;mirnas=mmu-miR-27a-3p&amp;threshold=0)</a></p> |
| Ifng (mmu) ⓘ   | mmu-miR-27a-3p ⓘ |    | <p><a href="#">0.847</a><br/> <a href="#">(/DianaTools/index.php?r=microT_CDS/results&amp;keywords=mmu-miR-27a-3p%20ENSMUSG00000055170&amp;genes=ENSMUSG00000055170&amp;mirnas=mmu-miR-27a-3p&amp;threshold=0)</a></p> |
| Tgoln1 (mmu) ⓘ | mmu-miR-27a-3p ⓘ |    | <p><a href="#">0.837</a><br/> <a href="#">(/DianaTools/index.php?r=microT_CDS/results&amp;keywords=mmu-miR-27a-3p%20ENSMUSG00000056429&amp;genes=ENSMUSG00000056429&amp;mirnas=mmu-miR-27a-3p&amp;threshold=0)</a></p> |
| Whsc1 (mmu) ⓘ  | mmu-miR-27a-3p ⓘ |    | <p><a href="#">0.832</a><br/> <a href="#">(/DianaTools/index.php?r=microT_CDS/results&amp;keywords=mmu-miR-27a-3p%20ENSMUSG00000057406&amp;genes=ENSMUSG00000057406&amp;mirnas=mmu-miR-27a-3p&amp;threshold=0)</a></p> |
| Prr14l (mmu) ⓘ | mmu-miR-27a-3p ⓘ |    | <p><a href="#">0.789</a><br/> <a href="#">(/DianaTools/index.php?r=microT_CDS/results&amp;keywords=mmu-miR-27a-3p%20ENSMUSG00000054280&amp;genes=ENSMUSG00000054280&amp;mirnas=mmu-miR-27a-3p&amp;threshold=0)</a></p> |
| Prr14l (mmu) ⓘ | mmu-miR-27a-3p ⓘ |   | <p><a href="#">0.789</a><br/> <a href="#">(/DianaTools/index.php?r=microT_CDS/results&amp;keywords=mmu-miR-27a-3p%20ENSMUSG00000054280&amp;genes=ENSMUSG00000054280&amp;mirnas=mmu-miR-27a-3p&amp;threshold=0)</a></p> |
| Arntl (mmu) ⓘ  | mmu-miR-27a-3p ⓘ |  | <p><a href="#">0.769</a><br/> <a href="#">(/DianaTools/index.php?r=microT_CDS/results&amp;keywords=mmu-miR-27a-3p%20ENSMUSG00000055116&amp;genes=ENSMUSG00000055116&amp;mirnas=mmu-miR-27a-3p&amp;threshold=0)</a></p> |
| Ubxn7 (mmu) ⓘ  | mmu-miR-27a-3p ⓘ |  | <p><a href="#">0.758</a><br/> <a href="#">(/DianaTools/index.php?r=microT_CDS/results&amp;keywords=mmu-miR-27a-3p%20ENSMUSG00000053774&amp;genes=ENSMUSG00000053774&amp;mirnas=mmu-miR-27a-3p&amp;threshold=0)</a></p> |
| Znrf2 (mmu) ⓘ  | mmu-miR-27a-3p ⓘ |  | <p><a href="#">0.744</a><br/> <a href="#">(/DianaTools/index.php?r=microT_CDS/results&amp;keywords=mmu-miR-27a-3p%20ENSMUSG00000058446&amp;genes=ENSMUSG00000058446&amp;mirnas=mmu-miR-27a-3p&amp;threshold=0)</a></p> |
| Plxnb1 (mmu) ⓘ | mmu-miR-27a-3p ⓘ |  | <p><a href="#">0.743</a><br/> <a href="#">(/DianaTools/index.php?r=microT_CDS/results&amp;keywords=mmu-miR-27a-3p%20ENSMUSG00000053646&amp;genes=ENSMUSG00000053646&amp;mirnas=mmu-miR-27a-3p&amp;threshold=0)</a></p> |

We have placed cookies on your device to help make this website and the services we offer better. By using this site, you agree to the use of cookies. [Learn more](#) ([/DianaTools/index.php?r=site/terms](#)).

I accept

|                 |                  |                                                                                      |                                                                                                                                                                                  |
|-----------------|------------------|--------------------------------------------------------------------------------------|----------------------------------------------------------------------------------------------------------------------------------------------------------------------------------|
| Atrnl1 (mmu) ⓘ  | mmu-miR-27a-3p ⓘ |    | 0.688<br>(/DianaTools/index.php?<br>r=miroT_CDS/results&keywords=mmu-<br>miR-27a-<br>3p%20ENSMUSG00000054843&genes=ENSMUSG00000054843&mirnas=mmu-<br>miR-27a-<br>3p&threshold=0) |
| Ankrd17 (mmu) ⓘ | mmu-miR-27a-3p ⓘ |    | 0.634<br>(/DianaTools/index.php?<br>r=miroT_CDS/results&keywords=mmu-<br>miR-27a-<br>3p%20ENSMUSG00000055204&genes=ENSMUSG00000055204&mirnas=mmu-<br>miR-27a-<br>3p&threshold=0) |
| Lclat1 (mmu) ⓘ  | mmu-miR-27a-3p ⓘ |    | 0.626<br>(/DianaTools/index.php?<br>r=miroT_CDS/results&keywords=mmu-<br>miR-27a-<br>3p%20ENSMUSG00000054469&genes=ENSMUSG00000054469&mirnas=mmu-<br>miR-27a-<br>3p&threshold=0) |
| Aak1 (mmu) ⓘ    | mmu-miR-27a-3p ⓘ |    | 0.623<br>(/DianaTools/index.php?<br>r=miroT_CDS/results&keywords=mmu-<br>miR-27a-<br>3p%20ENSMUSG00000057230&genes=ENSMUSG00000057230&mirnas=mmu-<br>miR-27a-<br>3p&threshold=0) |
| Spcs3 (mmu) ⓘ   | mmu-miR-27a-3p ⓘ |    | 0.610<br>(/DianaTools/index.php?<br>r=miroT_CDS/results&keywords=mmu-<br>miR-27a-<br>3p%20ENSMUSG00000054408&genes=ENSMUSG00000054408&mirnas=mmu-<br>miR-27a-<br>3p&threshold=0) |
| Map6 (mmu) ⓘ    | mmu-miR-27a-3p ⓘ |    | 0.590<br>(/DianaTools/index.php?<br>r=miroT_CDS/results&keywords=mmu-<br>miR-27a-<br>3p%20ENSMUSG00000055407&genes=ENSMUSG00000055407&mirnas=mmu-<br>miR-27a-<br>3p&threshold=0) |
| Synpr (mmu) ⓘ   | mmu-miR-27a-3p ⓘ |   | 0.579<br>(/DianaTools/index.php?<br>r=miroT_CDS/results&keywords=mmu-<br>miR-27a-<br>3p%20ENSMUSG00000056296&genes=ENSMUSG00000056296&mirnas=mmu-<br>miR-27a-<br>3p&threshold=0) |
| Chn1 (mmu) ⓘ    | mmu-miR-27a-3p ⓘ |  | 0.569<br>(/DianaTools/index.php?<br>r=miroT_CDS/results&keywords=mmu-<br>miR-27a-<br>3p%20ENSMUSG00000056486&genes=ENSMUSG00000056486&mirnas=mmu-<br>miR-27a-<br>3p&threshold=0) |
| Rras2 (mmu) ⓘ   | mmu-miR-27a-3p ⓘ |  | 0.567<br>(/DianaTools/index.php?<br>r=miroT_CDS/results&keywords=mmu-<br>miR-27a-<br>3p%20ENSMUSG00000055723&genes=ENSMUSG00000055723&mirnas=mmu-<br>miR-27a-<br>3p&threshold=0) |
| Nap114 (mmu) ⓘ  | mmu-miR-27a-3p ⓘ |  | 0.565<br>(/DianaTools/index.php?<br>r=miroT_CDS/results&keywords=mmu-<br>miR-27a-<br>3p%20ENSMUSG00000059119&genes=ENSMUSG00000059119<br>miR-27a-<br>3p&threshold=0)             |
| Lrif1 (mmu) ⓘ   | mmu-miR-27a-3p ⓘ |  | 0.565<br>(/DianaTools/index.php?<br>r=miroT_CDS/results&keywords=mmu-<br>miR-27a-<br>3p%20ENSMUSG00000056260&genes=ENSMUSG00000056260&mirnas=mmu-<br>miR-27a-<br>3p&threshold=0) |

We have placed cookies on your device to help make this website and the services we offer better. By using this site, you agree to the use of cookies. [Learn more](#) (</DianaTools/index.php?r=site/terms>).

I accept

|                |                  |                                                                                      |                                                                                                                                                                                                                                                                                                                                                                  |
|----------------|------------------|--------------------------------------------------------------------------------------|------------------------------------------------------------------------------------------------------------------------------------------------------------------------------------------------------------------------------------------------------------------------------------------------------------------------------------------------------------------|
| Uxs1 (mmu) ⓘ   | mmu-miR-27a-3p ⓘ |    | 0.564<br><a href="(/DianaTools/index.php?r=microT_CDS/results&amp;keywords=mmu-miR-27a-3p%20ENSMUSG00000057363&amp;genes=ENSMUSG00000057363&amp;mirnas=mmu-miR-27a-3p&amp;threshold=0)">(/DianaTools/index.php?r=microT_CDS/results&amp;keywords=mmu-miR-27a-3p%20ENSMUSG00000057363&amp;genes=ENSMUSG00000057363&amp;mirnas=mmu-miR-27a-3p&amp;threshold=0)</a> |
| Irs1 (mmu) ⓘ   | mmu-miR-27a-3p ⓘ |    | 0.559<br><a href="(/DianaTools/index.php?r=microT_CDS/results&amp;keywords=mmu-miR-27a-3p%20ENSMUSG00000055980&amp;genes=ENSMUSG00000055980&amp;mirnas=mmu-miR-27a-3p&amp;threshold=0)">(/DianaTools/index.php?r=microT_CDS/results&amp;keywords=mmu-miR-27a-3p%20ENSMUSG00000055980&amp;genes=ENSMUSG00000055980&amp;mirnas=mmu-miR-27a-3p&amp;threshold=0)</a> |
| Jakmp3 (mmu) ⓘ | mmu-miR-27a-3p ⓘ |    | 0.540<br><a href="(/DianaTools/index.php?r=microT_CDS/results&amp;keywords=mmu-miR-27a-3p%20ENSMUSG00000056856&amp;genes=ENSMUSG00000056856&amp;mirnas=mmu-miR-27a-3p&amp;threshold=0)">(/DianaTools/index.php?r=microT_CDS/results&amp;keywords=mmu-miR-27a-3p%20ENSMUSG00000056856&amp;genes=ENSMUSG00000056856&amp;mirnas=mmu-miR-27a-3p&amp;threshold=0)</a> |
| Adnp2 (mmu) ⓘ  | mmu-miR-27a-3p ⓘ |    | 0.540<br><a href="(/DianaTools/index.php?r=microT_CDS/results&amp;keywords=mmu-miR-27a-3p%20ENSMUSG00000053950&amp;genes=ENSMUSG00000053950&amp;mirnas=mmu-miR-27a-3p&amp;threshold=0)">(/DianaTools/index.php?r=microT_CDS/results&amp;keywords=mmu-miR-27a-3p%20ENSMUSG00000053950&amp;genes=ENSMUSG00000053950&amp;mirnas=mmu-miR-27a-3p&amp;threshold=0)</a> |
| Tns1 (mmu) ⓘ   | mmu-miR-27a-3p ⓘ |    | 0.532<br><a href="(/DianaTools/index.php?r=microT_CDS/results&amp;keywords=mmu-miR-27a-3p%20ENSMUSG00000055322&amp;genes=ENSMUSG00000055322&amp;mirnas=mmu-miR-27a-3p&amp;threshold=0)">(/DianaTools/index.php?r=microT_CDS/results&amp;keywords=mmu-miR-27a-3p%20ENSMUSG00000055322&amp;genes=ENSMUSG00000055322&amp;mirnas=mmu-miR-27a-3p&amp;threshold=0)</a> |
| Zzef1 (mmu) ⓘ  | mmu-miR-27a-3p ⓘ |    | 0.532<br><a href="(/DianaTools/index.php?r=microT_CDS/results&amp;keywords=mmu-miR-27a-3p%20ENSMUSG00000055670&amp;genes=ENSMUSG00000055670&amp;mirnas=mmu-miR-27a-3p&amp;threshold=0)">(/DianaTools/index.php?r=microT_CDS/results&amp;keywords=mmu-miR-27a-3p%20ENSMUSG00000055670&amp;genes=ENSMUSG00000055670&amp;mirnas=mmu-miR-27a-3p&amp;threshold=0)</a> |
| Nrgn (mmu) ⓘ   | mmu-miR-27a-3p ⓘ |   | 0.526<br><a href="(/DianaTools/index.php?r=microT_CDS/results&amp;keywords=mmu-miR-27a-3p%20ENSMUSG00000053310&amp;genes=ENSMUSG00000053310&amp;mirnas=mmu-miR-27a-3p&amp;threshold=0)">(/DianaTools/index.php?r=microT_CDS/results&amp;keywords=mmu-miR-27a-3p%20ENSMUSG00000053310&amp;genes=ENSMUSG00000053310&amp;mirnas=mmu-miR-27a-3p&amp;threshold=0)</a> |
| Abat (mmu) ⓘ   | mmu-miR-27a-3p ⓘ |  | 0.523<br><a href="(/DianaTools/index.php?r=microT_CDS/results&amp;keywords=mmu-miR-27a-3p%20ENSMUSG00000057880&amp;genes=ENSMUSG00000057880&amp;mirnas=mmu-miR-27a-3p&amp;threshold=0)">(/DianaTools/index.php?r=microT_CDS/results&amp;keywords=mmu-miR-27a-3p%20ENSMUSG00000057880&amp;genes=ENSMUSG00000057880&amp;mirnas=mmu-miR-27a-3p&amp;threshold=0)</a> |
| Eif4b (mmu) ⓘ  | mmu-miR-27a-3p ⓘ |  | 0.518<br><a href="(/DianaTools/index.php?r=microT_CDS/results&amp;keywords=mmu-miR-27a-3p%20ENSMUSG00000058655&amp;genes=ENSMUSG00000058655&amp;mirnas=mmu-miR-27a-3p&amp;threshold=0)">(/DianaTools/index.php?r=microT_CDS/results&amp;keywords=mmu-miR-27a-3p%20ENSMUSG00000058655&amp;genes=ENSMUSG00000058655&amp;mirnas=mmu-miR-27a-3p&amp;threshold=0)</a> |
| Tsnax (mmu) ⓘ  | mmu-miR-27a-3p ⓘ |  | 0.517<br><a href="(/DianaTools/index.php?r=microT_CDS/results&amp;keywords=mmu-miR-27a-3p%20ENSMUSG00000056820&amp;genes=ENSMUSG00000056820&amp;mirnas=mmu-miR-27a-3p&amp;threshold=0)">(/DianaTools/index.php?r=microT_CDS/results&amp;keywords=mmu-miR-27a-3p%20ENSMUSG00000056820&amp;genes=ENSMUSG00000056820&amp;mirnas=mmu-miR-27a-3p&amp;threshold=0)</a> |
| Ide (mmu) ⓘ    | mmu-miR-27a-3p ⓘ |  | 0.510<br><a href="(/DianaTools/index.php?r=microT_CDS/results&amp;keywords=mmu-miR-27a-3p%20ENSMUSG00000056999&amp;genes=ENSMUSG00000056999&amp;mirnas=mmu-miR-27a-3p&amp;threshold=0)">(/DianaTools/index.php?r=microT_CDS/results&amp;keywords=mmu-miR-27a-3p%20ENSMUSG00000056999&amp;genes=ENSMUSG00000056999&amp;mirnas=mmu-miR-27a-3p&amp;threshold=0)</a> |

We have placed cookies on your device to help make this website and the services we offer better. By using this site, you agree to the use of cookies. [Learn more]((/DianaTools/index.php?r=site/terms)) ([/DianaTools/index.php?r=site/terms]((/DianaTools/index.php?r=site/terms))).

I accept

|                       |                  |                                                                                      |                                                                                                                                                                                                               |
|-----------------------|------------------|--------------------------------------------------------------------------------------|---------------------------------------------------------------------------------------------------------------------------------------------------------------------------------------------------------------|
| Pde1a (mmu) ⓘ         | mmu-miR-27a-3p ⓘ |    | <a href="#">0.507</a><br><a href="#">(/DianaTools/index.php?r=microT_CDS/results&amp;keywords=mmu-miR-27a-3p%20ENSMUSG00000059173&amp;genes=ENSMUSG00000059173&amp;mirnas=mmu-miR-27a-3p&amp;threshold=0)</a> |
| A830018L16Rik (mmu) ⓘ | mmu-miR-27a-3p ⓘ |    | <a href="#">0.497</a><br><a href="#">(/DianaTools/index.php?r=microT_CDS/results&amp;keywords=mmu-miR-27a-3p%20ENSMUSG00000057715&amp;genes=ENSMUSG00000057715&amp;mirnas=mmu-miR-27a-3p&amp;threshold=0)</a> |
| Pdlim1 (mmu) ⓘ        | mmu-miR-27a-3p ⓘ |    | <a href="#">0.494</a><br><a href="#">(/DianaTools/index.php?r=microT_CDS/results&amp;keywords=mmu-miR-27a-3p%20ENSMUSG00000055044&amp;genes=ENSMUSG00000055044&amp;mirnas=mmu-miR-27a-3p&amp;threshold=0)</a> |
| Ap1s3 (mmu) ⓘ         | mmu-miR-27a-3p ⓘ |    | <a href="#">0.493</a><br><a href="#">(/DianaTools/index.php?r=microT_CDS/results&amp;keywords=mmu-miR-27a-3p%20ENSMUSG00000054702&amp;genes=ENSMUSG00000054702&amp;mirnas=mmu-miR-27a-3p&amp;threshold=0)</a> |
| Zfp53 (mmu) ⓘ         | mmu-miR-27a-3p ⓘ |    | <a href="#">0.491</a><br><a href="#">(/DianaTools/index.php?r=microT_CDS/results&amp;keywords=mmu-miR-27a-3p%20ENSMUSG00000057409&amp;genes=ENSMUSG00000057409&amp;mirnas=mmu-miR-27a-3p&amp;threshold=0)</a> |
| Kcnc1 (mmu) ⓘ         | mmu-miR-27a-3p ⓘ |    | <a href="#">0.480</a><br><a href="#">(/DianaTools/index.php?r=microT_CDS/results&amp;keywords=mmu-miR-27a-3p%20ENSMUSG00000058975&amp;genes=ENSMUSG00000058975&amp;mirnas=mmu-miR-27a-3p&amp;threshold=0)</a> |
| Adam12 (mmu) ⓘ        | mmu-miR-27a-3p ⓘ |   | <a href="#">0.479</a><br><a href="#">(/DianaTools/index.php?r=microT_CDS/results&amp;keywords=mmu-miR-27a-3p%20ENSMUSG00000054555&amp;genes=ENSMUSG00000054555&amp;mirnas=mmu-miR-27a-3p&amp;threshold=0)</a> |
| Kdm2a (mmu) ⓘ         | mmu-miR-27a-3p ⓘ |  | <a href="#">0.478</a><br><a href="#">(/DianaTools/index.php?r=microT_CDS/results&amp;keywords=mmu-miR-27a-3p%20ENSMUSG00000054611&amp;genes=ENSMUSG00000054611&amp;mirnas=mmu-miR-27a-3p&amp;threshold=0)</a> |
| Bcl2 (mmu) ⓘ          | mmu-miR-27a-3p ⓘ |  | <a href="#">0.474</a><br><a href="#">(/DianaTools/index.php?r=microT_CDS/results&amp;keywords=mmu-miR-27a-3p%20ENSMUSG00000057329&amp;genes=ENSMUSG00000057329&amp;mirnas=mmu-miR-27a-3p&amp;threshold=0)</a> |
| Cfhr1 (mmu) ⓘ         | mmu-miR-27a-3p ⓘ |  | <a href="#">0.470</a><br><a href="#">(/DianaTools/index.php?r=microT_CDS/results&amp;keywords=mmu-miR-27a-3p%20ENSMUSG00000057037&amp;genes=ENSMUSG00000057037&amp;mirnas=mmu-miR-27a-3p&amp;threshold=0)</a> |
| Slc30a7 (mmu) ⓘ       | mmu-miR-27a-3p ⓘ |  | <a href="#">0.470</a><br><a href="#">(/DianaTools/index.php?r=microT_CDS/results&amp;keywords=mmu-miR-27a-3p%20ENSMUSG00000054414&amp;genes=ENSMUSG00000054414&amp;mirnas=mmu-miR-27a-3p&amp;threshold=0)</a> |

We have placed cookies on your device to help make this website and the services we offer better. By using this site, you agree to the use of cookies. [Learn more](#) ([/DianaTools/index.php?r=site/terms](#)).

I accept

|                       |                  |                                                                                      |                                                                                                                                                                                                                                                                                                                                                                |
|-----------------------|------------------|--------------------------------------------------------------------------------------|----------------------------------------------------------------------------------------------------------------------------------------------------------------------------------------------------------------------------------------------------------------------------------------------------------------------------------------------------------------|
| Cspp1 (mmu) ⓘ         | mmu-miR-27a-3p ⓘ |    | 0.465<br><a href="(/DianaTools/index.php?r=miroT_CDS/results&amp;keywords=mmu-miR-27a-3p%20ENSMUSG00000056763&amp;genes=ENSMUSG00000056763&amp;mirnas=mmu-miR-27a-3p&amp;threshold=0)">(/DianaTools/index.php?r=miroT_CDS/results&amp;keywords=mmu-miR-27a-3p%20ENSMUSG00000056763&amp;genes=ENSMUSG00000056763&amp;mirnas=mmu-miR-27a-3p&amp;threshold=0)</a> |
| A430033K04Rik (mmu) ⓘ | mmu-miR-27a-3p ⓘ |    | 0.455<br><a href="(/DianaTools/index.php?r=miroT_CDS/results&amp;keywords=mmu-miR-27a-3p%20ENSMUSG00000056014&amp;genes=ENSMUSG00000056014&amp;mirnas=mmu-miR-27a-3p&amp;threshold=0)">(/DianaTools/index.php?r=miroT_CDS/results&amp;keywords=mmu-miR-27a-3p%20ENSMUSG00000056014&amp;genes=ENSMUSG00000056014&amp;mirnas=mmu-miR-27a-3p&amp;threshold=0)</a> |
| Klf2 (mmu) ⓘ          | mmu-miR-27a-3p ⓘ |    | 0.454<br><a href="(/DianaTools/index.php?r=miroT_CDS/results&amp;keywords=mmu-miR-27a-3p%20ENSMUSG00000055148&amp;genes=ENSMUSG00000055148&amp;mirnas=mmu-miR-27a-3p&amp;threshold=0)">(/DianaTools/index.php?r=miroT_CDS/results&amp;keywords=mmu-miR-27a-3p%20ENSMUSG00000055148&amp;genes=ENSMUSG00000055148&amp;mirnas=mmu-miR-27a-3p&amp;threshold=0)</a> |
| Klf2 (mmu) ⓘ          | mmu-miR-27a-3p ⓘ |    | 0.454<br><a href="(/DianaTools/index.php?r=miroT_CDS/results&amp;keywords=mmu-miR-27a-3p%20ENSMUSG00000055148&amp;genes=ENSMUSG00000055148&amp;mirnas=mmu-miR-27a-3p&amp;threshold=0)">(/DianaTools/index.php?r=miroT_CDS/results&amp;keywords=mmu-miR-27a-3p%20ENSMUSG00000055148&amp;genes=ENSMUSG00000055148&amp;mirnas=mmu-miR-27a-3p&amp;threshold=0)</a> |
| Dennd1b (mmu) ⓘ       | mmu-miR-27a-3p ⓘ |    | 0.451<br><a href="(/DianaTools/index.php?r=miroT_CDS/results&amp;keywords=mmu-miR-27a-3p%20ENSMUSG00000056268&amp;genes=ENSMUSG00000056268&amp;mirnas=mmu-miR-27a-3p&amp;threshold=0)">(/DianaTools/index.php?r=miroT_CDS/results&amp;keywords=mmu-miR-27a-3p%20ENSMUSG00000056268&amp;genes=ENSMUSG00000056268&amp;mirnas=mmu-miR-27a-3p&amp;threshold=0)</a> |
| Usp34 (mmu) ⓘ         | mmu-miR-27a-3p ⓘ |    | -                                                                                                                                                                                                                                                                                                                                                              |
| Sh3bp2 (mmu) ⓘ        | mmu-miR-27a-3p ⓘ |    | -                                                                                                                                                                                                                                                                                                                                                              |
| Sptan1 (mmu) ⓘ        | mmu-miR-27a-3p ⓘ |    | -                                                                                                                                                                                                                                                                                                                                                              |
| Cpsf6 (mmu) ⓘ         | mmu-miR-27a-3p ⓘ |    | -                                                                                                                                                                                                                                                                                                                                                              |
| Ech1 (mmu) ⓘ          | mmu-miR-27a-3p ⓘ |    | -                                                                                                                                                                                                                                                                                                                                                              |
| Srcap (mmu) ⓘ         | mmu-miR-27a-3p ⓘ |   | -                                                                                                                                                                                                                                                                                                                                                              |
| Whsc1 (mmu) ⓘ         | mmu-miR-27a-3p ⓘ |  | -                                                                                                                                                                                                                                                                                                                                                              |
| Cntrl (mmu) ⓘ         | mmu-miR-27a-3p ⓘ |  | -                                                                                                                                                                                                                                                                                                                                                              |
| Usp21 (mmu) ⓘ         | mmu-miR-27a-3p ⓘ |  | -                                                                                                                                                                                                                                                                                                                                                              |
| Mdm4 (mmu) ⓘ          | mmu-miR-27a-3p ⓘ |  | -                                                                                                                                                                                                                                                                                                                                                              |
| Pcbp2 (mmu) ⓘ         | mmu-miR-27a-3p ⓘ |  | -                                                                                                                                                                                                                                                                                                                                                              |
| Gimap4 (mmu) ⓘ        | mmu-miR-27a-3p ⓘ |  | -                                                                                                                                                                                                                                                                                                                                                              |
| Klhl25 (mmu) ⓘ        | mmu-miR-27a-3p ⓘ |  | -                                                                                                                                                                                                                                                                                                                                                              |
| Kcnq3 (mmu) ⓘ         | mmu-miR-27a-3p ⓘ |  | -                                                                                                                                                                                                                                                                                                                                                              |
| Chd8 (mmu) ⓘ          | mmu-miR-27a-3p ⓘ |  | -                                                                                                                                                                                                                                                                                                                                                              |
| Em1 (mmu) ⓘ           | mmu-miR-27a-3p ⓘ |  | -                                                                                                                                                                                                                                                                                                                                                              |
| Cd47 (mmu) ⓘ          | mmu-miR-27a-3p ⓘ |  | -                                                                                                                                                                                                                                                                                                                                                              |
| Usp34 (mmu) ⓘ         | mmu-miR-27a-3p ⓘ |  | -                                                                                                                                                                                                                                                                                                                                                              |

We have placed cookies on your device to help make this website and the services we offer better. By using this site, you agree to the use of cookies. [Learn more \(/DianaTools/index.php?r=site/terms\)]((/DianaTools/index.php?r=site/terms))

I accept

|                 |                  |    |                                                                                                                                                                                                                                                                                                                                                                              |
|-----------------|------------------|----|------------------------------------------------------------------------------------------------------------------------------------------------------------------------------------------------------------------------------------------------------------------------------------------------------------------------------------------------------------------------------|
| Spock2 (mmu) ⓘ  | mmu-miR-27a-3p ⓘ | IP | -                                                                                                                                                                                                                                                                                                                                                                            |
| Fry (mmu) ⓘ     | mmu-miR-27a-3p ⓘ | IP | -                                                                                                                                                                                                                                                                                                                                                                            |
| Nap114 (mmu) ⓘ  | mmu-miR-27a-3p ⓘ | IP | -                                                                                                                                                                                                                                                                                                                                                                            |
| Cntn1 (mmu) ⓘ   | mmu-miR-27a-3p ⓘ | IP | -                                                                                                                                                                                                                                                                                                                                                                            |
| Ddn (mmu) ⓘ     | mmu-miR-27a-3p ⓘ | IP | -                                                                                                                                                                                                                                                                                                                                                                            |
| Mrpl18 (mmu) ⓘ  | mmu-miR-27a-3p ⓘ | IP | -                                                                                                                                                                                                                                                                                                                                                                            |
| Pom121 (mmu) ⓘ  | mmu-miR-27a-3p ⓘ | IP | -                                                                                                                                                                                                                                                                                                                                                                            |
| Cpsf6 (mmu) ⓘ   | mmu-miR-27a-3p ⓘ | IP | -                                                                                                                                                                                                                                                                                                                                                                            |
| B4galt6 (mmu) ⓘ | mmu-miR-27a-3p ⓘ | IP | -                                                                                                                                                                                                                                                                                                                                                                            |
| Cstf2t (mmu) ⓘ  | mmu-miR-27a-3p ⓘ | IP | -                                                                                                                                                                                                                                                                                                                                                                            |
| Cstf2t (mmu) ⓘ  | mmu-miR-27a-3p ⓘ | IP | -                                                                                                                                                                                                                                                                                                                                                                            |
| Gm9938 (mmu) ⓘ  | mmu-miR-27a-3p ⓘ | IP | -                                                                                                                                                                                                                                                                                                                                                                            |
| Cggbp1 (mmu) ⓘ  | mmu-miR-27a-3p ⓘ | IP | -                                                                                                                                                                                                                                                                                                                                                                            |
| Cggbp1 (mmu) ⓘ  | mmu-miR-27a-3p ⓘ | IP | -                                                                                                                                                                                                                                                                                                                                                                            |
| Pgpep1 (mmu) ⓘ  | mmu-miR-27a-3p ⓘ | IP | -                                                                                                                                                                                                                                                                                                                                                                            |
| Srcap (mmu) ⓘ   | mmu-miR-27a-3p ⓘ | IP | -                                                                                                                                                                                                                                                                                                                                                                            |
| Tubb2a (mmu) ⓘ  | mmu-miR-27a-3p ⓘ | IP | -                                                                                                                                                                                                                                                                                                                                                                            |
| Eif3b (mmu) ⓘ   | mmu-miR-27a-3p ⓘ | IP | -                                                                                                                                                                                                                                                                                                                                                                            |
| Fam73a (mmu) ⓘ  | mmu-miR-27a-3p ⓘ | IP | -                                                                                                                                                                                                                                                                                                                                                                            |
| Klh5 (mmu) ⓘ    | mmu-miR-27a-3p ⓘ | IP | -                                                                                                                                                                                                                                                                                                                                                                            |
| Adam10 (mmu) ⓘ  | mmu-miR-27a-3p ⓘ | IP | -                                                                                                                                                                                                                                                                                                                                                                            |
| Camk2d (mmu) ⓘ  | mmu-miR-27a-3p ⓘ | IP | -                                                                                                                                                                                                                                                                                                                                                                            |
| Mapk14 (mmu) ⓘ  | mmu-miR-27a-3p ⓘ | IP | -                                                                                                                                                                                                                                                                                                                                                                            |
| Rapgef2 (mmu) ⓘ | mmu-miR-27a-3p ⓘ | IP | <p>0.998<br/> <a href="http://DianaTools/index.php?r=miroT_CDS/results&amp;keywords=mmu-miR-27a-3p%20ENSMUSG00000062232&amp;genes=ENSMUSG00000062232&amp;mirnas=mmu-miR-27a-3p&amp;threshold=0"> (/DianaTools/index.php?r=miroT_CDS/results&amp;keywords=mmu-miR-27a-3p%20ENSMUSG00000062232&amp;genes=ENSMUSG00000062232&amp;mirnas=mmu-miR-27a-3p&amp;threshold=0)</a></p> |
| Nr6a1 (mmu) ⓘ   | mmu-miR-27a-3p ⓘ | IP | <p>0.979<br/> <a href="http://DianaTools/index.php?r=miroT_CDS/results&amp;keywords=mmu-miR-27a-3p%20ENSMUSG00000063972&amp;genes=ENSMUSG00000063972&amp;mirnas=mmu-miR-27a-3p&amp;threshold=0"> (/DianaTools/index.php?r=miroT_CDS/results&amp;keywords=mmu-miR-27a-3p%20ENSMUSG00000063972&amp;genes=ENSMUSG00000063972&amp;mirnas=mmu-miR-27a-3p&amp;threshold=0)</a></p> |
| Paqr9 (mmu) ⓘ   | mmu-miR-27a-3p ⓘ | IP | <p>0.972<br/> <a href="http://DianaTools/index.php?r=miroT_CDS/results&amp;keywords=mmu-miR-27a-3p%20ENSMUSG00000064225&amp;genes=ENSMUSG00000064225&amp;mirnas=mmu-miR-27a-3p&amp;threshold=0"> (/DianaTools/index.php?r=miroT_CDS/results&amp;keywords=mmu-miR-27a-3p%20ENSMUSG00000064225&amp;genes=ENSMUSG00000064225&amp;mirnas=mmu-miR-27a-3p&amp;threshold=0)</a></p> |

We have placed cookies on your device to help make this website and the services we offer better. By using this site, you agree to the use of cookies. [Learn more](#) ( [\(/DianaTools/index.php?r=site/terms\)](http://DianaTools/index.php?r=site/terms))

I accept

|                |                  |                                                                                      |                                                                                                                                                                                                                                                                                                                                                                                           |
|----------------|------------------|--------------------------------------------------------------------------------------|-------------------------------------------------------------------------------------------------------------------------------------------------------------------------------------------------------------------------------------------------------------------------------------------------------------------------------------------------------------------------------------------|
| Paqr9 (mmu) ⓘ  | mmu-miR-27a-3p ⓘ |    | 0.972<br><a href="(/DianaTools/index.php?r=microT_CDS/results&amp;keywords=mmu-miR-27a-3p%20ENSMUSG00000064225&amp;genes=ENSMUSG00000064225&amp;mirnas=mmu-miR-27a-3p&amp;threshold=0)">(/DianaTools/index.php?<br/>r=microT_CDS/results&amp;keywords=mmu-<br/>miR-27a-<br/>3p%20ENSMUSG00000064225&amp;genes=ENSMUSG00000064225&amp;mirnas=mmu-<br/>miR-27a-<br/>3p&amp;threshold=0)</a> |
| Naa15 (mmu) ⓘ  | mmu-miR-27a-3p ⓘ |    | 0.972<br><a href="(/DianaTools/index.php?r=microT_CDS/results&amp;keywords=mmu-miR-27a-3p%20ENSMUSG00000063273&amp;genes=ENSMUSG00000063273&amp;mirnas=mmu-miR-27a-3p&amp;threshold=0)">(/DianaTools/index.php?<br/>r=microT_CDS/results&amp;keywords=mmu-<br/>miR-27a-<br/>3p%20ENSMUSG00000063273&amp;genes=ENSMUSG00000063273&amp;mirnas=mmu-<br/>miR-27a-<br/>3p&amp;threshold=0)</a> |
| Mbtd1 (mmu) ⓘ  | mmu-miR-27a-3p ⓘ |    | 0.957<br><a href="(/DianaTools/index.php?r=microT_CDS/results&amp;keywords=mmu-miR-27a-3p%20ENSMUSG00000059474&amp;genes=ENSMUSG00000059474&amp;mirnas=mmu-miR-27a-3p&amp;threshold=0)">(/DianaTools/index.php?<br/>r=microT_CDS/results&amp;keywords=mmu-<br/>miR-27a-<br/>3p%20ENSMUSG00000059474&amp;genes=ENSMUSG00000059474&amp;mirnas=mmu-<br/>miR-27a-<br/>3p&amp;threshold=0)</a> |
| Gtf2i (mmu) ⓘ  | mmu-miR-27a-3p ⓘ |    | 0.925<br><a href="(/DianaTools/index.php?r=microT_CDS/results&amp;keywords=mmu-miR-27a-3p%20ENSMUSG00000060261&amp;genes=ENSMUSG00000060261&amp;mirnas=mmu-miR-27a-3p&amp;threshold=0)">(/DianaTools/index.php?<br/>r=microT_CDS/results&amp;keywords=mmu-<br/>miR-27a-<br/>3p%20ENSMUSG00000060261&amp;genes=ENSMUSG00000060261&amp;mirnas=mmu-<br/>miR-27a-<br/>3p&amp;threshold=0)</a> |
| Hipk2 (mmu) ⓘ  | mmu-miR-27a-3p ⓘ |    | 0.915<br><a href="(/DianaTools/index.php?r=microT_CDS/results&amp;keywords=mmu-miR-27a-3p%20ENSMUSG00000061436&amp;genes=ENSMUSG00000061436&amp;mirnas=mmu-miR-27a-3p&amp;threshold=0)">(/DianaTools/index.php?<br/>r=microT_CDS/results&amp;keywords=mmu-<br/>miR-27a-<br/>3p%20ENSMUSG00000061436&amp;genes=ENSMUSG00000061436&amp;mirnas=mmu-<br/>miR-27a-<br/>3p&amp;threshold=0)</a> |
| Hipk2 (mmu) ⓘ  | mmu-miR-27a-3p ⓘ |    | 0.915<br><a href="(/DianaTools/index.php?r=microT_CDS/results&amp;keywords=mmu-miR-27a-3p%20ENSMUSG00000061436&amp;genes=ENSMUSG00000061436&amp;mirnas=mmu-miR-27a-3p&amp;threshold=0)">(/DianaTools/index.php?<br/>r=microT_CDS/results&amp;keywords=mmu-<br/>miR-27a-<br/>3p%20ENSMUSG00000061436&amp;genes=ENSMUSG00000061436&amp;mirnas=mmu-<br/>miR-27a-<br/>3p&amp;threshold=0)</a> |
| Brwd3 (mmu) ⓘ  | mmu-miR-27a-3p ⓘ |    | 0.913<br><a href="(/DianaTools/index.php?r=microT_CDS/results&amp;keywords=mmu-miR-27a-3p%20ENSMUSG00000063663&amp;genes=ENSMUSG00000063663&amp;mirnas=mmu-miR-27a-3p&amp;threshold=0)">(/DianaTools/index.php?<br/>r=microT_CDS/results&amp;keywords=mmu-<br/>miR-27a-<br/>3p%20ENSMUSG00000063663&amp;genes=ENSMUSG00000063663&amp;mirnas=mmu-<br/>miR-27a-<br/>3p&amp;threshold=0)</a> |
| Rnf14 (mmu) ⓘ  | mmu-miR-27a-3p ⓘ |  | 0.900<br><a href="(/DianaTools/index.php?r=microT_CDS/results&amp;keywords=mmu-miR-27a-3p%20ENSMUSG00000060450&amp;genes=ENSMUSG00000060450&amp;mirnas=mmu-miR-27a-3p&amp;threshold=0)">(/DianaTools/index.php?<br/>r=microT_CDS/results&amp;keywords=mmu-<br/>miR-27a-<br/>3p%20ENSMUSG00000060450&amp;genes=ENSMUSG00000060450&amp;mirnas=mmu-<br/>miR-27a-<br/>3p&amp;threshold=0)</a> |
| Nrxn3 (mmu) ⓘ  | mmu-miR-27a-3p ⓘ |  | 0.876<br><a href="(/DianaTools/index.php?r=microT_CDS/results&amp;keywords=mmu-miR-27a-3p%20ENSMUSG00000066392&amp;genes=ENSMUSG00000066392&amp;mirnas=mmu-miR-27a-3p&amp;threshold=0)">(/DianaTools/index.php?<br/>r=microT_CDS/results&amp;keywords=mmu-<br/>miR-27a-<br/>3p%20ENSMUSG00000066392&amp;genes=ENSMUSG00000066392&amp;mirnas=mmu-<br/>miR-27a-<br/>3p&amp;threshold=0)</a> |
| Zbtb18 (mmu) ⓘ | mmu-miR-27a-3p ⓘ |  | 0.866<br><a href="(/DianaTools/index.php?r=microT_CDS/results&amp;keywords=mmu-miR-27a-3p%20ENSMUSG00000063659&amp;genes=ENSMUSG00000063659&amp;mirnas=mmu-miR-27a-3p&amp;threshold=0)">(/DianaTools/index.php?<br/>r=microT_CDS/results&amp;keywords=mmu-<br/>miR-27a-<br/>3p%20ENSMUSG00000063659&amp;genes=ENSMUSG00000063659&amp;mirnas=mmu-<br/>miR-27a-<br/>3p&amp;threshold=0)</a> |
| Dot1l (mmu) ⓘ  | mmu-miR-27a-3p ⓘ |  | 0.850<br><a href="(/DianaTools/index.php?r=microT_CDS/results&amp;keywords=mmu-miR-27a-3p%20ENSMUSG00000061589&amp;genes=ENSMUSG00000061589&amp;mirnas=mmu-miR-27a-3p&amp;threshold=0)">(/DianaTools/index.php?<br/>r=microT_CDS/results&amp;keywords=mmu-<br/>miR-27a-<br/>3p%20ENSMUSG00000061589&amp;genes=ENSMUSG00000061589&amp;mirnas=mmu-<br/>miR-27a-<br/>3p&amp;threshold=0)</a> |

We have placed cookies on your device to help make this website and the services we offer better. By using this site, you agree to the use of cookies. [Learn more](#) ([\(/DianaTools/index.php?r=site/terms\)]((/DianaTools/index.php?r=site/terms))).

I accept

|                      |                  |                                                                                      |                                                                                                                                                                                              |
|----------------------|------------------|--------------------------------------------------------------------------------------|----------------------------------------------------------------------------------------------------------------------------------------------------------------------------------------------|
| Alg11 (mmu) ⓘ        | mmu-miR-27a-3p ⓘ |    | 0.850<br><a href="#">(/DianaTools/index.php?r=miroT_CDS/results&amp;keywords=mmu-miR-27a-3p%20ENSMUSG00000063362&amp;genes=ENSMUSG00000063362&amp;mirnas=mmu-miR-27a-3p&amp;threshold=0)</a> |
| Bod1l (mmu) ⓘ        | mmu-miR-27a-3p ⓘ |    | 0.834<br><a href="#">(/DianaTools/index.php?r=miroT_CDS/results&amp;keywords=mmu-miR-27a-3p%20ENSMUSG00000061755&amp;genes=ENSMUSG00000061755&amp;mirnas=mmu-miR-27a-3p&amp;threshold=0)</a> |
| Bod1l (mmu) ⓘ        | mmu-miR-27a-3p ⓘ |    | 0.834<br><a href="#">(/DianaTools/index.php?r=miroT_CDS/results&amp;keywords=mmu-miR-27a-3p%20ENSMUSG00000061755&amp;genes=ENSMUSG00000061755&amp;mirnas=mmu-miR-27a-3p&amp;threshold=0)</a> |
| Qk (mmu) ⓘ           | mmu-miR-27a-3p ⓘ |    | 0.803<br><a href="#">(/DianaTools/index.php?r=miroT_CDS/results&amp;keywords=mmu-miR-27a-3p%20ENSMUSG00000062078&amp;genes=ENSMUSG00000062078&amp;mirnas=mmu-miR-27a-3p&amp;threshold=0)</a> |
| 261008E11Rik (mmu) ⓘ | mmu-miR-27a-3p ⓘ |    | 0.795<br><a href="#">(/DianaTools/index.php?r=miroT_CDS/results&amp;keywords=mmu-miR-27a-3p%20ENSMUSG00000060301&amp;genes=ENSMUSG00000060301&amp;mirnas=mmu-miR-27a-3p&amp;threshold=0)</a> |
| Dzip3 (mmu) ⓘ        | mmu-miR-27a-3p ⓘ |    | 0.794<br><a href="#">(/DianaTools/index.php?r=miroT_CDS/results&amp;keywords=mmu-miR-27a-3p%20ENSMUSG00000064061&amp;genes=ENSMUSG00000064061&amp;mirnas=mmu-miR-27a-3p&amp;threshold=0)</a> |
| Cd2ap (mmu) ⓘ        | mmu-miR-27a-3p ⓘ |    | 0.757<br><a href="#">(/DianaTools/index.php?r=miroT_CDS/results&amp;keywords=mmu-miR-27a-3p%20ENSMUSG00000061665&amp;genes=ENSMUSG00000061665&amp;mirnas=mmu-miR-27a-3p&amp;threshold=0)</a> |
| Slc27a4 (mmu) ⓘ      | mmu-miR-27a-3p ⓘ |  | 0.731<br><a href="#">(/DianaTools/index.php?r=miroT_CDS/results&amp;keywords=mmu-miR-27a-3p%20ENSMUSG00000059316&amp;genes=ENSMUSG00000059316&amp;mirnas=mmu-miR-27a-3p&amp;threshold=0)</a> |
| Copz1 (mmu) ⓘ        | mmu-miR-27a-3p ⓘ |  | 0.715<br><a href="#">(/DianaTools/index.php?r=miroT_CDS/results&amp;keywords=mmu-miR-27a-3p%20ENSMUSG00000060992&amp;genes=ENSMUSG00000060992&amp;mirnas=mmu-miR-27a-3p&amp;threshold=0)</a> |
| Copz1 (mmu) ⓘ        | mmu-miR-27a-3p ⓘ |  | 0.715<br><a href="#">(/DianaTools/index.php?r=miroT_CDS/results&amp;keywords=mmu-miR-27a-3p%20ENSMUSG00000060992&amp;genes=ENSMUSG00000060992&amp;mirnas=mmu-miR-27a-3p&amp;threshold=0)</a> |
| Ap3s2 (mmu) ⓘ        | mmu-miR-27a-3p ⓘ |  | 0.703<br><a href="#">(/DianaTools/index.php?r=miroT_CDS/results&amp;keywords=mmu-miR-27a-3p%20ENSMUSG00000063801&amp;genes=ENSMUSG00000063801&amp;mirnas=mmu-miR-27a-3p&amp;threshold=0)</a> |

We have placed cookies on your device to help make this website and the services we offer better. By using this site, you agree to the use of cookies. [Learn more](#) ([/DianaTools/index.php?r=site/terms](#)).

I accept



|                       |                  |                                                                                      |                                                                                                                                                                                                                       |
|-----------------------|------------------|--------------------------------------------------------------------------------------|-----------------------------------------------------------------------------------------------------------------------------------------------------------------------------------------------------------------------|
| Slc9a6 (mmu) ⓘ        | mmu-miR-27a-3p ⓘ |    | <p><a href="#">0.698</a><br/> <a href="#">(/DianaTools/index.php?r=miroT_CDS/results&amp;keywords=mmu-miR-27a-3p%20ENSMUSG00000060681&amp;genes=ENSMUSG00000060681&amp;mirnas=mmu-miR-27a-3p&amp;threshold=0)</a></p> |
| Tmed5 (mmu) ⓘ         | mmu-miR-27a-3p ⓘ |    | <p><a href="#">0.696</a><br/> <a href="#">(/DianaTools/index.php?r=miroT_CDS/results&amp;keywords=mmu-miR-27a-3p%20ENSMUSG00000063406&amp;genes=ENSMUSG00000063406&amp;mirnas=mmu-miR-27a-3p&amp;threshold=0)</a></p> |
| Kcnd2 (mmu) ⓘ         | mmu-miR-27a-3p ⓘ |    | <p><a href="#">0.693</a><br/> <a href="#">(/DianaTools/index.php?r=miroT_CDS/results&amp;keywords=mmu-miR-27a-3p%20ENSMUSG00000060882&amp;genes=ENSMUSG00000060882&amp;mirnas=mmu-miR-27a-3p&amp;threshold=0)</a></p> |
| Gspt1 (mmu) ⓘ         | mmu-miR-27a-3p ⓘ |    | <p><a href="#">0.691</a><br/> <a href="#">(/DianaTools/index.php?r=miroT_CDS/results&amp;keywords=mmu-miR-27a-3p%20ENSMUSG00000062203&amp;genes=ENSMUSG00000062203&amp;mirnas=mmu-miR-27a-3p&amp;threshold=0)</a></p> |
| Usp31 (mmu) ⓘ         | mmu-miR-27a-3p ⓘ |    | <p><a href="#">0.624</a><br/> <a href="#">(/DianaTools/index.php?r=miroT_CDS/results&amp;keywords=mmu-miR-27a-3p%20ENSMUSG00000063317&amp;genes=ENSMUSG00000063317&amp;mirnas=mmu-miR-27a-3p&amp;threshold=0)</a></p> |
| Nupl1 (mmu) ⓘ         | mmu-miR-27a-3p ⓘ |    | <p><a href="#">0.622</a><br/> <a href="#">(/DianaTools/index.php?r=miroT_CDS/results&amp;keywords=mmu-miR-27a-3p%20ENSMUSG00000063895&amp;genes=ENSMUSG00000063895&amp;mirnas=mmu-miR-27a-3p&amp;threshold=0)</a></p> |
| Ipcf1 (mmu) ⓘ         | mmu-miR-27a-3p ⓘ |   | <p><a href="#">0.605</a><br/> <a href="#">(/DianaTools/index.php?r=miroT_CDS/results&amp;keywords=mmu-miR-27a-3p%20ENSMUSG00000064065&amp;genes=ENSMUSG00000064065&amp;mirnas=mmu-miR-27a-3p&amp;threshold=0)</a></p> |
| Impad1 (mmu) ⓘ        | mmu-miR-27a-3p ⓘ |  | <p><a href="#">0.596</a><br/> <a href="#">(/DianaTools/index.php?r=miroT_CDS/results&amp;keywords=mmu-miR-27a-3p%20ENSMUSG00000066324&amp;genes=ENSMUSG00000066324&amp;mirnas=mmu-miR-27a-3p&amp;threshold=0)</a></p> |
| Impad1 (mmu) ⓘ        | mmu-miR-27a-3p ⓘ |  | <p><a href="#">0.596</a><br/> <a href="#">(/DianaTools/index.php?r=miroT_CDS/results&amp;keywords=mmu-miR-27a-3p%20ENSMUSG00000066324&amp;genes=ENSMUSG00000066324&amp;mirnas=mmu-miR-27a-3p&amp;threshold=0)</a></p> |
| Col23a1 (mmu) ⓘ       | mmu-miR-27a-3p ⓘ |  | <p><a href="#">0.586</a><br/> <a href="#">(/DianaTools/index.php?r=miroT_CDS/results&amp;keywords=mmu-miR-27a-3p%20ENSMUSG00000063564&amp;genes=ENSMUSG00000063564&amp;mirnas=mmu-miR-27a-3p&amp;threshold=0)</a></p> |
| 0610040J01Rik (mmu) ⓘ | mmu-miR-27a-3p ⓘ |  | <p><a href="#">0.580</a><br/> <a href="#">(/DianaTools/index.php?r=miroT_CDS/results&amp;keywords=mmu-miR-27a-3p%20ENSMUSG00000060512&amp;genes=ENSMUSG00000060512&amp;mirnas=mmu-miR-27a-3p&amp;threshold=0)</a></p> |

We have placed cookies on your device to help make this website and the services we offer better. By using this site, you agree to the use of cookies. [Learn more](#) ([/DianaTools/index.php?r=site/terms](#)).

I accept

|                  |                  |                                                                                      |                                                                                                                                                                                                                                                                                                                                                                                                           |
|------------------|------------------|--------------------------------------------------------------------------------------|-----------------------------------------------------------------------------------------------------------------------------------------------------------------------------------------------------------------------------------------------------------------------------------------------------------------------------------------------------------------------------------------------------------|
| Fam78b (mmu) ⓘ   | mmu-miR-27a-3p ⓘ |    | <a href="#">0.573</a><br><a href="(/DianaTools/index.php?r=microT_CDS/results&amp;keywords=mmu-miR-27a-3p%20ENSMUSG00000060568&amp;genes=ENSMUSG00000060568&amp;mirnas=mmu-miR-27a-3p&amp;threshold=0)">(/DianaTools/index.php?<br/>r=microT_CDS/results&amp;keywords=mmu-<br/>miR-27a-<br/>3p%20ENSMUSG00000060568&amp;genes=ENSMUSG00000060568&amp;mirnas=mmu-<br/>miR-27a-<br/>3p&amp;threshold=0)</a> |
| Mapk1 (mmu) ⓘ    | mmu-miR-27a-3p ⓘ |    | <a href="#">0.535</a><br><a href="(/DianaTools/index.php?r=microT_CDS/results&amp;keywords=mmu-miR-27a-3p%20ENSMUSG00000063358&amp;genes=ENSMUSG00000063358&amp;mirnas=mmu-miR-27a-3p&amp;threshold=0)">(/DianaTools/index.php?<br/>r=microT_CDS/results&amp;keywords=mmu-<br/>miR-27a-<br/>3p%20ENSMUSG00000063358&amp;genes=ENSMUSG00000063358&amp;mirnas=mmu-<br/>miR-27a-<br/>3p&amp;threshold=0)</a> |
| Akap13 (mmu) ⓘ   | mmu-miR-27a-3p ⓘ |    | <a href="#">0.532</a><br><a href="(/DianaTools/index.php?r=microT_CDS/results&amp;keywords=mmu-miR-27a-3p%20ENSMUSG00000066406&amp;genes=ENSMUSG00000066406&amp;mirnas=mmu-miR-27a-3p&amp;threshold=0)">(/DianaTools/index.php?<br/>r=microT_CDS/results&amp;keywords=mmu-<br/>miR-27a-<br/>3p%20ENSMUSG00000066406&amp;genes=ENSMUSG00000066406&amp;mirnas=mmu-<br/>miR-27a-<br/>3p&amp;threshold=0)</a> |
| Bloc1s4 (mmu) ⓘ  | mmu-miR-27a-3p ⓘ |    | <a href="#">0.528</a><br><a href="(/DianaTools/index.php?r=microT_CDS/results&amp;keywords=mmu-miR-27a-3p%20ENSMUSG00000060708&amp;genes=ENSMUSG00000060708&amp;mirnas=mmu-miR-27a-3p&amp;threshold=0)">(/DianaTools/index.php?<br/>r=microT_CDS/results&amp;keywords=mmu-<br/>miR-27a-<br/>3p%20ENSMUSG00000060708&amp;genes=ENSMUSG00000060708&amp;mirnas=mmu-<br/>miR-27a-<br/>3p&amp;threshold=0)</a> |
| Vkorc111 (mmu) ⓘ | mmu-miR-27a-3p ⓘ |    | <a href="#">0.527</a><br><a href="(/DianaTools/index.php?r=microT_CDS/results&amp;keywords=mmu-miR-27a-3p%20ENSMUSG00000066735&amp;genes=ENSMUSG00000066735&amp;mirnas=mmu-miR-27a-3p&amp;threshold=0)">(/DianaTools/index.php?<br/>r=microT_CDS/results&amp;keywords=mmu-<br/>miR-27a-<br/>3p%20ENSMUSG00000066735&amp;genes=ENSMUSG00000066735&amp;mirnas=mmu-<br/>miR-27a-<br/>3p&amp;threshold=0)</a> |
| Ano6 (mmu) ⓘ     | mmu-miR-27a-3p ⓘ |    | <a href="#">0.521</a><br><a href="(/DianaTools/index.php?r=microT_CDS/results&amp;keywords=mmu-miR-27a-3p%20ENSMUSG00000064210&amp;genes=ENSMUSG00000064210&amp;mirnas=mmu-miR-27a-3p&amp;threshold=0)">(/DianaTools/index.php?<br/>r=microT_CDS/results&amp;keywords=mmu-<br/>miR-27a-<br/>3p%20ENSMUSG00000064210&amp;genes=ENSMUSG00000064210&amp;mirnas=mmu-<br/>miR-27a-<br/>3p&amp;threshold=0)</a> |
| Zfp28 (mmu) ⓘ    | mmu-miR-27a-3p ⓘ |   | <a href="#">0.502</a><br><a href="(/DianaTools/index.php?r=microT_CDS/results&amp;keywords=mmu-miR-27a-3p%20ENSMUSG00000062861&amp;genes=ENSMUSG00000062861&amp;mirnas=mmu-miR-27a-3p&amp;threshold=0)">(/DianaTools/index.php?<br/>r=microT_CDS/results&amp;keywords=mmu-<br/>miR-27a-<br/>3p%20ENSMUSG00000062861&amp;genes=ENSMUSG00000062861&amp;mirnas=mmu-<br/>miR-27a-<br/>3p&amp;threshold=0)</a> |
| Lgi1 (mmu) ⓘ     | mmu-miR-27a-3p ⓘ |  | <a href="#">0.500</a><br><a href="(/DianaTools/index.php?r=microT_CDS/results&amp;keywords=mmu-miR-27a-3p%20ENSMUSG00000067242&amp;genes=ENSMUSG00000067242&amp;mirnas=mmu-miR-27a-3p&amp;threshold=0)">(/DianaTools/index.php?<br/>r=microT_CDS/results&amp;keywords=mmu-<br/>miR-27a-<br/>3p%20ENSMUSG00000067242&amp;genes=ENSMUSG00000067242&amp;mirnas=mmu-<br/>miR-27a-<br/>3p&amp;threshold=0)</a> |
| Calcr1 (mmu) ⓘ   | mmu-miR-27a-3p ⓘ |  | <a href="#">0.497</a><br><a href="(/DianaTools/index.php?r=microT_CDS/results&amp;keywords=mmu-miR-27a-3p%20ENSMUSG00000059588&amp;genes=ENSMUSG00000059588&amp;mirnas=mmu-miR-27a-3p&amp;threshold=0)">(/DianaTools/index.php?<br/>r=microT_CDS/results&amp;keywords=mmu-<br/>miR-27a-<br/>3p%20ENSMUSG00000059588&amp;genes=ENSMUSG00000059588&amp;mirnas=mmu-<br/>miR-27a-<br/>3p&amp;threshold=0)</a> |
| Rnasel (mmu) ⓘ   | mmu-miR-27a-3p ⓘ |  | <a href="#">0.494</a><br><a href="(/DianaTools/index.php?r=microT_CDS/results&amp;keywords=mmu-miR-27a-3p%20ENSMUSG00000066800&amp;genes=ENSMUSG00000066800&amp;mirnas=mmu-miR-27a-3p&amp;threshold=0)">(/DianaTools/index.php?<br/>r=microT_CDS/results&amp;keywords=mmu-<br/>miR-27a-<br/>3p%20ENSMUSG00000066800&amp;genes=ENSMUSG00000066800&amp;mirnas=mmu-<br/>miR-27a-<br/>3p&amp;threshold=0)</a> |
| Zfp266 (mmu) ⓘ   | mmu-miR-27a-3p ⓘ |  | <a href="#">0.471</a><br><a href="(/DianaTools/index.php?r=microT_CDS/results&amp;keywords=mmu-miR-27a-3p%20ENSMUSG00000060510&amp;genes=ENSMUSG00000060510&amp;mirnas=mmu-miR-27a-3p&amp;threshold=0)">(/DianaTools/index.php?<br/>r=microT_CDS/results&amp;keywords=mmu-<br/>miR-27a-<br/>3p%20ENSMUSG00000060510&amp;genes=ENSMUSG00000060510&amp;mirnas=mmu-<br/>miR-27a-<br/>3p&amp;threshold=0)</a> |

We have placed cookies on your device to help make this website and the services we offer better. By using this site, you agree to the use of cookies. [Learn more](#) ([/DianaTools/index.php?r=site/terms]((/DianaTools/index.php?r=site/terms))).

I accept

|                                                                                                       |                                                                                                    |                                                                                      |                                                                                                                                                                                                                                                                                                                                                                                              |
|-------------------------------------------------------------------------------------------------------|----------------------------------------------------------------------------------------------------|--------------------------------------------------------------------------------------|----------------------------------------------------------------------------------------------------------------------------------------------------------------------------------------------------------------------------------------------------------------------------------------------------------------------------------------------------------------------------------------------|
| Zfp266 (mmu)         | mmu-miR-27a-3p    |    | <a href="http://DianaTools/index.php?r=miroT_CDS/results&amp;keywords=mmu-miR-27a-3p%20ENSMUSG00000060510&amp;genes=ENSMUSG00000060510&amp;mirnas=mmu-miR-27a-3p&amp;threshold=0">0.471<br/>(/DianaTools/index.php?<br/>r=miroT_CDS/results&amp;keywords=mmu-<br/>miR-27a-<br/>3p%20ENSMUSG00000060510&amp;genes=ENSMUSG00000060510&amp;mirnas=mmu-<br/>miR-27a-<br/>3p&amp;threshold=0)</a> |
| Phactr2 (mmu)        | mmu-miR-27a-3p    |    | <a href="http://DianaTools/index.php?r=miroT_CDS/results&amp;keywords=mmu-miR-27a-3p%20ENSMUSG00000062866&amp;genes=ENSMUSG00000062866&amp;mirnas=mmu-miR-27a-3p&amp;threshold=0">0.458<br/>(/DianaTools/index.php?<br/>r=miroT_CDS/results&amp;keywords=mmu-<br/>miR-27a-<br/>3p%20ENSMUSG00000062866&amp;genes=ENSMUSG00000062866&amp;mirnas=mmu-<br/>miR-27a-<br/>3p&amp;threshold=0)</a> |
| Mocs1 (mmu)          | mmu-miR-27a-3p    |    | -                                                                                                                                                                                                                                                                                                                                                                                            |
| Syne2 (mmu)          | mmu-miR-27a-3p    |    | -                                                                                                                                                                                                                                                                                                                                                                                            |
| 1190007I07Rik (mmu)  | mmu-miR-27a-3p    |    | -                                                                                                                                                                                                                                                                                                                                                                                            |
| Sepp1 (mmu)          | mmu-miR-27a-3p    |    | -                                                                                                                                                                                                                                                                                                                                                                                            |
| Ube4a (mmu)          | mmu-miR-27a-3p    |    | -                                                                                                                                                                                                                                                                                                                                                                                            |
| Rnasel (mmu)         | mmu-miR-27a-3p    |    | -                                                                                                                                                                                                                                                                                                                                                                                            |
| Klhdc3 (mmu)         | mmu-miR-27a-3p    |    | -                                                                                                                                                                                                                                                                                                                                                                                            |
| H2-K1 (mmu)          | mmu-miR-27a-3p    |    | -                                                                                                                                                                                                                                                                                                                                                                                            |
| Cdyl (mmu)           | mmu-miR-27a-3p    |    | -                                                                                                                                                                                                                                                                                                                                                                                            |
| Grb2 (mmu)           | mmu-miR-27a-3p    |    | -                                                                                                                                                                                                                                                                                                                                                                                            |
| Gm7964 (mmu)         | mmu-miR-27a-3p    |    | -                                                                                                                                                                                                                                                                                                                                                                                            |
| Stat4 (mmu)          | mmu-miR-27a-3p    |    | -                                                                                                                                                                                                                                                                                                                                                                                            |
| Ipo7 (mmu)           | mmu-miR-27a-3p    |    | -                                                                                                                                                                                                                                                                                                                                                                                            |
| Kif1b (mmu)          | mmu-miR-27a-3p    |    | -                                                                                                                                                                                                                                                                                                                                                                                            |
| Lsamp (mmu)          | mmu-miR-27a-3p    |    | -                                                                                                                                                                                                                                                                                                                                                                                            |
| Dot1l (mmu)        | mmu-miR-27a-3p  |  | -                                                                                                                                                                                                                                                                                                                                                                                            |
| Gmfb (mmu)         | mmu-miR-27a-3p  |  | -                                                                                                                                                                                                                                                                                                                                                                                            |
| Ubr4 (mmu)         | mmu-miR-27a-3p  |  | -                                                                                                                                                                                                                                                                                                                                                                                            |
| Cxcl12 (mmu)       | mmu-miR-27a-3p  |  | -                                                                                                                                                                                                                                                                                                                                                                                            |
| Atp11c (mmu)       | mmu-miR-27a-3p  |  | -                                                                                                                                                                                                                                                                                                                                                                                            |
| Slc9a6 (mmu)       | mmu-miR-27a-3p  |  | -                                                                                                                                                                                                                                                                                                                                                                                            |
| Rab3ip (mmu)       | mmu-miR-27a-3p  |  | -                                                                                                                                                                                                                                                                                                                                                                                            |
| Tubb4a (mmu)       | mmu-miR-27a-3p  |  | -                                                                                                                                                                                                                                                                                                                                                                                            |
| Srpk2 (mmu)        | mmu-miR-27a-3p  |  | -                                                                                                                                                                                                                                                                                                                                                                                            |
| Ksr2 (mmu)         | mmu-miR-27a-3p  |  | -                                                                                                                                                                                                                                                                                                                                                                                            |
| Rai1 (mmu)         | mmu-miR-27a-3p  |  | -                                                                                                                                                                                                                                                                                                                                                                                            |

We have placed cookies on your device to help make this website and the services we offer better. By using this site, you agree to the use of cookies. [Learn more \(/DianaTools/index.php?r=site/terms\)](http://DianaTools/index.php?r=site/terms)

I accept

|                       |                  |    |   |
|-----------------------|------------------|----|---|
| Stk24 (mmu) ⓘ         | mmu-miR-27a-3p ⓘ | IP | - |
| Chd4 (mmu) ⓘ          | mmu-miR-27a-3p ⓘ | IP | - |
| Prpf4 (mmu) ⓘ         | mmu-miR-27a-3p ⓘ | IP | - |
| Unc13c (mmu) ⓘ        | mmu-miR-27a-3p ⓘ | IP | - |
| Zfp26 (mmu) ⓘ         | mmu-miR-27a-3p ⓘ | IP | - |
| 6030419C18Rik (mmu) ⓘ | mmu-miR-27a-3p ⓘ | IP | - |
| Flot2 (mmu) ⓘ         | mmu-miR-27a-3p ⓘ | IP | - |
| Sepp1 (mmu) ⓘ         | mmu-miR-27a-3p ⓘ | IP | - |
| Qk (mmu) ⓘ            | mmu-miR-27a-3p ⓘ | IP | - |
| Akap6 (mmu) ⓘ         | mmu-miR-27a-3p ⓘ | IP | - |
| Slc31a2 (mmu) ⓘ       | mmu-miR-27a-3p ⓘ | IP | - |
| Dpp6 (mmu) ⓘ          | mmu-miR-27a-3p ⓘ | IP | - |
| Cadm2 (mmu) ⓘ         | mmu-miR-27a-3p ⓘ | IP | - |
| Lancl2 (mmu) ⓘ        | mmu-miR-27a-3p ⓘ | IP | - |
| Ext1 (mmu) ⓘ          | mmu-miR-27a-3p ⓘ | IP | - |
| Jazf1 (mmu) ⓘ         | mmu-miR-27a-3p ⓘ | IP | - |
| Aox1 (mmu) ⓘ          | mmu-miR-27a-3p ⓘ | IP | - |
| Kbtbd2 (mmu) ⓘ        | mmu-miR-27a-3p ⓘ | IP | - |
| Crem (mmu) ⓘ          | mmu-miR-27a-3p ⓘ | IP | - |
| Rdh11 (mmu) ⓘ         | mmu-miR-27a-3p ⓘ | IP | - |
| Zcchc14 (mmu) ⓘ       | mmu-miR-27a-3p ⓘ | IP | - |
| Aox3 (mmu) ⓘ          | mmu-miR-27a-3p ⓘ | IP | - |
| Mug1 (mmu) ⓘ          | mmu-miR-27a-3p ⓘ | IP | - |
| Mapk1 (mmu) ⓘ         | mmu-miR-27a-3p ⓘ | IP | - |
| Mapk1 (mmu) ⓘ         | mmu-miR-27a-3p ⓘ | IP | - |

|                 |                  |    |                                                                                                                                                                                                                                                                                                                    |
|-----------------|------------------|----|--------------------------------------------------------------------------------------------------------------------------------------------------------------------------------------------------------------------------------------------------------------------------------------------------------------------|
| Arfgef1 (mmu) ⓘ | mmu-miR-27a-3p ⓘ | IP | <p>0.999<br/> <a href="/DianaTools/index.php?r=miroT_CDS/results&amp;keywords=mmu-miR-27a-3p%20ENSMUSG00000067851&amp;genes=ENSMUSG00000067851&amp;threshold=0"> (/DianaTools/index.php?r=miroT_CDS/results&amp;keywords=mmu-miR-27a-3p%20ENSMUSG00000067851&amp;genes=ENSMUSG00000067851&amp;threshold=0)</a></p> |
|-----------------|------------------|----|--------------------------------------------------------------------------------------------------------------------------------------------------------------------------------------------------------------------------------------------------------------------------------------------------------------------|

|                 |                  |    |                                                                                                                                                                                                                                                                                                                    |
|-----------------|------------------|----|--------------------------------------------------------------------------------------------------------------------------------------------------------------------------------------------------------------------------------------------------------------------------------------------------------------------|
| Arfgef1 (mmu) ⓘ | mmu-miR-27a-3p ⓘ | IP | <p>0.999<br/> <a href="/DianaTools/index.php?r=miroT_CDS/results&amp;keywords=mmu-miR-27a-3p%20ENSMUSG00000067851&amp;genes=ENSMUSG00000067851&amp;threshold=0"> (/DianaTools/index.php?r=miroT_CDS/results&amp;keywords=mmu-miR-27a-3p%20ENSMUSG00000067851&amp;genes=ENSMUSG00000067851&amp;threshold=0)</a></p> |
|-----------------|------------------|----|--------------------------------------------------------------------------------------------------------------------------------------------------------------------------------------------------------------------------------------------------------------------------------------------------------------------|

We have placed cookies on your device to help make this website and the services we offer better. By using this site, you agree to the use of cookies. [Learn more \(/DianaTools/index.php?r=site/terms\)](/DianaTools/index.php?r=site/terms).

I accept

|                  |                  |                                                                                      |                                                                                                                                                                                                                                                                                                                                                                                           |
|------------------|------------------|--------------------------------------------------------------------------------------|-------------------------------------------------------------------------------------------------------------------------------------------------------------------------------------------------------------------------------------------------------------------------------------------------------------------------------------------------------------------------------------------|
| Tmem170b (mmu) ⓘ | mmu-miR-27a-3p ⓘ |    | 0.975<br><a href="(/DianaTools/index.php?r=microT_CDS/results&amp;keywords=mmu-miR-27a-3p%20ENSMUSG00000087370&amp;genes=ENSMUSG00000087370&amp;mirnas=mmu-miR-27a-3p&amp;threshold=0)">(/DianaTools/index.php?<br/>r=microT_CDS/results&amp;keywords=mmu-<br/>miR-27a-<br/>3p%20ENSMUSG00000087370&amp;genes=ENSMUSG00000087370&amp;mirnas=mmu-<br/>miR-27a-<br/>3p&amp;threshold=0)</a> |
| Tmem170b (mmu) ⓘ | mmu-miR-27a-3p ⓘ |    | 0.975<br><a href="(/DianaTools/index.php?r=microT_CDS/results&amp;keywords=mmu-miR-27a-3p%20ENSMUSG00000087370&amp;genes=ENSMUSG00000087370&amp;mirnas=mmu-miR-27a-3p&amp;threshold=0)">(/DianaTools/index.php?<br/>r=microT_CDS/results&amp;keywords=mmu-<br/>miR-27a-<br/>3p%20ENSMUSG00000087370&amp;genes=ENSMUSG00000087370&amp;mirnas=mmu-<br/>miR-27a-<br/>3p&amp;threshold=0)</a> |
| Nap1l2 (mmu) ⓘ   | mmu-miR-27a-3p ⓘ |    | 0.961<br><a href="(/DianaTools/index.php?r=microT_CDS/results&amp;keywords=mmu-miR-27a-3p%20ENSMUSG00000082229&amp;genes=ENSMUSG00000082229&amp;mirnas=mmu-miR-27a-3p&amp;threshold=0)">(/DianaTools/index.php?<br/>r=microT_CDS/results&amp;keywords=mmu-<br/>miR-27a-<br/>3p%20ENSMUSG00000082229&amp;genes=ENSMUSG00000082229&amp;mirnas=mmu-<br/>miR-27a-<br/>3p&amp;threshold=0)</a> |
| Fam84b (mmu) ⓘ   | mmu-miR-27a-3p ⓘ |    | 0.952<br><a href="(/DianaTools/index.php?r=microT_CDS/results&amp;keywords=mmu-miR-27a-3p%20ENSMUSG00000072568&amp;genes=ENSMUSG00000072568&amp;mirnas=mmu-miR-27a-3p&amp;threshold=0)">(/DianaTools/index.php?<br/>r=microT_CDS/results&amp;keywords=mmu-<br/>miR-27a-<br/>3p%20ENSMUSG00000072568&amp;genes=ENSMUSG00000072568&amp;mirnas=mmu-<br/>miR-27a-<br/>3p&amp;threshold=0)</a> |
| Casc3 (mmu) ⓘ    | mmu-miR-27a-3p ⓘ |    | 0.947<br><a href="(/DianaTools/index.php?r=microT_CDS/results&amp;keywords=mmu-miR-27a-3p%20ENSMUSG00000078676&amp;genes=ENSMUSG00000078676&amp;mirnas=mmu-miR-27a-3p&amp;threshold=0)">(/DianaTools/index.php?<br/>r=microT_CDS/results&amp;keywords=mmu-<br/>miR-27a-<br/>3p%20ENSMUSG00000078676&amp;genes=ENSMUSG00000078676&amp;mirnas=mmu-<br/>miR-27a-<br/>3p&amp;threshold=0)</a> |
| Casc3 (mmu) ⓘ    | mmu-miR-27a-3p ⓘ |    | 0.947<br><a href="(/DianaTools/index.php?r=microT_CDS/results&amp;keywords=mmu-miR-27a-3p%20ENSMUSG00000078676&amp;genes=ENSMUSG00000078676&amp;mirnas=mmu-miR-27a-3p&amp;threshold=0)">(/DianaTools/index.php?<br/>r=microT_CDS/results&amp;keywords=mmu-<br/>miR-27a-<br/>3p%20ENSMUSG00000078676&amp;genes=ENSMUSG00000078676&amp;mirnas=mmu-<br/>miR-27a-<br/>3p&amp;threshold=0)</a> |
| Gm608 (mmu) ⓘ    | mmu-miR-27a-3p ⓘ |   | 0.938<br><a href="(/DianaTools/index.php?r=microT_CDS/results&amp;keywords=mmu-miR-27a-3p%20ENSMUSG00000068284&amp;genes=ENSMUSG00000068284&amp;mirnas=mmu-miR-27a-3p&amp;threshold=0)">(/DianaTools/index.php?<br/>r=microT_CDS/results&amp;keywords=mmu-<br/>miR-27a-<br/>3p%20ENSMUSG00000068284&amp;genes=ENSMUSG00000068284&amp;mirnas=mmu-<br/>miR-27a-<br/>3p&amp;threshold=0)</a> |
| Slc5a3 (mmu) ⓘ   | mmu-miR-27a-3p ⓘ |  | 0.934<br><a href="(/DianaTools/index.php?r=microT_CDS/results&amp;keywords=mmu-miR-27a-3p%20ENSMUSG00000089774&amp;genes=ENSMUSG00000089774&amp;mirnas=mmu-miR-27a-3p&amp;threshold=0)">(/DianaTools/index.php?<br/>r=microT_CDS/results&amp;keywords=mmu-<br/>miR-27a-<br/>3p%20ENSMUSG00000089774&amp;genes=ENSMUSG00000089774&amp;mirnas=mmu-<br/>miR-27a-<br/>3p&amp;threshold=0)</a> |
| Plcx2 (mmu) ⓘ    | mmu-miR-27a-3p ⓘ |  | 0.926<br><a href="(/DianaTools/index.php?r=microT_CDS/results&amp;keywords=mmu-miR-27a-3p%20ENSMUSG00000087141&amp;genes=ENSMUSG00000087141&amp;mirnas=mmu-miR-27a-3p&amp;threshold=0)">(/DianaTools/index.php?<br/>r=microT_CDS/results&amp;keywords=mmu-<br/>miR-27a-<br/>3p%20ENSMUSG00000087141&amp;genes=ENSMUSG00000087141&amp;mirnas=mmu-<br/>miR-27a-<br/>3p&amp;threshold=0)</a> |
| Plcx2 (mmu) ⓘ    | mmu-miR-27a-3p ⓘ |  | 0.926<br><a href="(/DianaTools/index.php?r=microT_CDS/results&amp;keywords=mmu-miR-27a-3p%20ENSMUSG00000087141&amp;genes=ENSMUSG00000087141&amp;mirnas=mmu-miR-27a-3p&amp;threshold=0)">(/DianaTools/index.php?<br/>r=microT_CDS/results&amp;keywords=mmu-<br/>miR-27a-<br/>3p%20ENSMUSG00000087141&amp;genes=ENSMUSG00000087141&amp;mirnas=mmu-<br/>miR-27a-<br/>3p&amp;threshold=0)</a> |
| Pgap1 (mmu) ⓘ    | mmu-miR-27a-3p ⓘ |  | 0.916<br><a href="(/DianaTools/index.php?r=microT_CDS/results&amp;keywords=mmu-miR-27a-3p%20ENSMUSG00000073678&amp;genes=ENSMUSG00000073678&amp;mirnas=mmu-miR-27a-3p&amp;threshold=0)">(/DianaTools/index.php?<br/>r=microT_CDS/results&amp;keywords=mmu-<br/>miR-27a-<br/>3p%20ENSMUSG00000073678&amp;genes=ENSMUSG00000073678&amp;mirnas=mmu-<br/>miR-27a-<br/>3p&amp;threshold=0)</a> |

We have placed cookies on your device to help make this website and the services we offer better. By using this site, you agree to the use of cookies. [Learn more](#) ([\(/DianaTools/index.php?r=site/terms\)]((/DianaTools/index.php?r=site/terms)))

I accept

|                  |                  |                                                                                      |                                                                                                                                                                                                                                                                                                                                                                                           |
|------------------|------------------|--------------------------------------------------------------------------------------|-------------------------------------------------------------------------------------------------------------------------------------------------------------------------------------------------------------------------------------------------------------------------------------------------------------------------------------------------------------------------------------------|
| Marcks (mmu) ⓘ   | mmu-miR-27a-3p ⓘ |    | <p><a href="#">0.913</a><br/> <a href="(/DianaTools/index.php?r=microT_CDS/results&amp;keywords=mmu-miR-27a-3p%20ENSMUSG00000069662&amp;genes=ENSMUSG00000069662&amp;mirnas=mmu-miR-27a-3p&amp;threshold=0)">(/DianaTools/index.php?r=microT_CDS/results&amp;keywords=mmu-miR-27a-3p%20ENSMUSG00000069662&amp;genes=ENSMUSG00000069662&amp;mirnas=mmu-miR-27a-3p&amp;threshold=0)</a></p> |
| Marcks (mmu) ⓘ   | mmu-miR-27a-3p ⓘ |    | <p><a href="#">0.913</a><br/> <a href="(/DianaTools/index.php?r=microT_CDS/results&amp;keywords=mmu-miR-27a-3p%20ENSMUSG00000069662&amp;genes=ENSMUSG00000069662&amp;mirnas=mmu-miR-27a-3p&amp;threshold=0)">(/DianaTools/index.php?r=microT_CDS/results&amp;keywords=mmu-miR-27a-3p%20ENSMUSG00000069662&amp;genes=ENSMUSG00000069662&amp;mirnas=mmu-miR-27a-3p&amp;threshold=0)</a></p> |
| AI606181 (mmu) ⓘ | mmu-miR-27a-3p ⓘ |    | <p><a href="#">0.906</a><br/> <a href="(/DianaTools/index.php?r=microT_CDS/results&amp;keywords=mmu-miR-27a-3p%20ENSMUSG00000074873&amp;genes=ENSMUSG00000074873&amp;mirnas=mmu-miR-27a-3p&amp;threshold=0)">(/DianaTools/index.php?r=microT_CDS/results&amp;keywords=mmu-miR-27a-3p%20ENSMUSG00000074873&amp;genes=ENSMUSG00000074873&amp;mirnas=mmu-miR-27a-3p&amp;threshold=0)</a></p> |
| AI606181 (mmu) ⓘ | mmu-miR-27a-3p ⓘ |    | <p><a href="#">0.906</a><br/> <a href="(/DianaTools/index.php?r=microT_CDS/results&amp;keywords=mmu-miR-27a-3p%20ENSMUSG00000074873&amp;genes=ENSMUSG00000074873&amp;mirnas=mmu-miR-27a-3p&amp;threshold=0)">(/DianaTools/index.php?r=microT_CDS/results&amp;keywords=mmu-miR-27a-3p%20ENSMUSG00000074873&amp;genes=ENSMUSG00000074873&amp;mirnas=mmu-miR-27a-3p&amp;threshold=0)</a></p> |
| Jrkl (mmu) ⓘ     | mmu-miR-27a-3p ⓘ |    | <p><a href="#">0.902</a><br/> <a href="(/DianaTools/index.php?r=microT_CDS/results&amp;keywords=mmu-miR-27a-3p%20ENSMUSG00000079083&amp;genes=ENSMUSG00000079083&amp;mirnas=mmu-miR-27a-3p&amp;threshold=0)">(/DianaTools/index.php?r=microT_CDS/results&amp;keywords=mmu-miR-27a-3p%20ENSMUSG00000079083&amp;genes=ENSMUSG00000079083&amp;mirnas=mmu-miR-27a-3p&amp;threshold=0)</a></p> |
| Cecr2 (mmu) ⓘ    | mmu-miR-27a-3p ⓘ |    | <p><a href="#">0.882</a><br/> <a href="(/DianaTools/index.php?r=microT_CDS/results&amp;keywords=mmu-miR-27a-3p%20ENSMUSG00000071226&amp;genes=ENSMUSG00000071226&amp;mirnas=mmu-miR-27a-3p&amp;threshold=0)">(/DianaTools/index.php?r=microT_CDS/results&amp;keywords=mmu-miR-27a-3p%20ENSMUSG00000071226&amp;genes=ENSMUSG00000071226&amp;mirnas=mmu-miR-27a-3p&amp;threshold=0)</a></p> |
| Mfhas1 (mmu) ⓘ   | mmu-miR-27a-3p ⓘ |    | <p><a href="#">0.870</a><br/> <a href="(/DianaTools/index.php?r=microT_CDS/results&amp;keywords=mmu-miR-27a-3p%20ENSMUSG00000070056&amp;genes=ENSMUSG00000070056&amp;mirnas=mmu-miR-27a-3p&amp;threshold=0)">(/DianaTools/index.php?r=microT_CDS/results&amp;keywords=mmu-miR-27a-3p%20ENSMUSG00000070056&amp;genes=ENSMUSG00000070056&amp;mirnas=mmu-miR-27a-3p&amp;threshold=0)</a></p> |
| C78339 (mmu) ⓘ   | mmu-miR-27a-3p ⓘ |  | <p><a href="#">0.860</a><br/> <a href="(/DianaTools/index.php?r=microT_CDS/results&amp;keywords=mmu-miR-27a-3p%20ENSMUSG00000069237&amp;genes=ENSMUSG00000069237&amp;mirnas=mmu-miR-27a-3p&amp;threshold=0)">(/DianaTools/index.php?r=microT_CDS/results&amp;keywords=mmu-miR-27a-3p%20ENSMUSG00000069237&amp;genes=ENSMUSG00000069237&amp;mirnas=mmu-miR-27a-3p&amp;threshold=0)</a></p> |
| Zfp652 (mmu) ⓘ   | mmu-miR-27a-3p ⓘ |  | <p><a href="#">0.850</a><br/> <a href="(/DianaTools/index.php?r=microT_CDS/results&amp;keywords=mmu-miR-27a-3p%20ENSMUSG00000075595&amp;genes=ENSMUSG00000075595&amp;mirnas=mmu-miR-27a-3p&amp;threshold=0)">(/DianaTools/index.php?r=microT_CDS/results&amp;keywords=mmu-miR-27a-3p%20ENSMUSG00000075595&amp;genes=ENSMUSG00000075595&amp;mirnas=mmu-miR-27a-3p&amp;threshold=0)</a></p> |
| Zfp652 (mmu) ⓘ   | mmu-miR-27a-3p ⓘ |  | <p><a href="#">0.850</a><br/> <a href="(/DianaTools/index.php?r=microT_CDS/results&amp;keywords=mmu-miR-27a-3p%20ENSMUSG00000075595&amp;genes=ENSMUSG0000007555">(/DianaTools/index.php?r=microT_CDS/results&amp;keywords=mmu-miR-27a-3p%20ENSMUSG00000075595&amp;genes=ENSMUSG0000007555</a></p>                                                                                         |
| Tmem19 (mmu) ⓘ   | mmu-miR-27a-3p ⓘ |  | <p><a href="#">0.843</a><br/> <a href="(/DianaTools/index.php?r=microT_CDS/results&amp;keywords=mmu-miR-27a-3p%20ENSMUSG00000069520&amp;genes=ENSMUSG00000069520&amp;mirnas=mmu-miR-27a-3p&amp;threshold=0)">(/DianaTools/index.php?r=microT_CDS/results&amp;keywords=mmu-miR-27a-3p%20ENSMUSG00000069520&amp;genes=ENSMUSG00000069520&amp;mirnas=mmu-miR-27a-3p&amp;threshold=0)</a></p> |

We have placed cookies on your device to help make this website and the services we offer better. By using this site, you agree to the use of cookies. [Learn more](#) ([\(/DianaTools/index.php?r=site/terms\)]((/DianaTools/index.php?r=site/terms)))

I accept

|                 |                  |                                                                                      |                                                                                                                                                                                                                                                                                                                                                                  |
|-----------------|------------------|--------------------------------------------------------------------------------------|------------------------------------------------------------------------------------------------------------------------------------------------------------------------------------------------------------------------------------------------------------------------------------------------------------------------------------------------------------------|
| Nbeal1 (mmu) ⓘ  | mmu-miR-27a-3p ⓘ |    | 0.802<br><a href="(/DianaTools/index.php?r=microT_CDS/results&amp;keywords=mmu-miR-27a-3p%20ENSMUSG00000073664&amp;genes=ENSMUSG00000073664&amp;mirnas=mmu-miR-27a-3p&amp;threshold=0)">(/DianaTools/index.php?r=microT_CDS/results&amp;keywords=mmu-miR-27a-3p%20ENSMUSG00000073664&amp;genes=ENSMUSG00000073664&amp;mirnas=mmu-miR-27a-3p&amp;threshold=0)</a> |
| Rc3h2 (mmu) ⓘ   | mmu-miR-27a-3p ⓘ |    | 0.777<br><a href="(/DianaTools/index.php?r=microT_CDS/results&amp;keywords=mmu-miR-27a-3p%20ENSMUSG00000075376&amp;genes=ENSMUSG00000075376&amp;mirnas=mmu-miR-27a-3p&amp;threshold=0)">(/DianaTools/index.php?r=microT_CDS/results&amp;keywords=mmu-miR-27a-3p%20ENSMUSG00000075376&amp;genes=ENSMUSG00000075376&amp;mirnas=mmu-miR-27a-3p&amp;threshold=0)</a> |
| Seh1l (mmu) ⓘ   | mmu-miR-27a-3p ⓘ |    | 0.777<br><a href="(/DianaTools/index.php?r=microT_CDS/results&amp;keywords=mmu-miR-27a-3p%20ENSMUSG00000079614&amp;genes=ENSMUSG00000079614&amp;mirnas=mmu-miR-27a-3p&amp;threshold=0)">(/DianaTools/index.php?r=microT_CDS/results&amp;keywords=mmu-miR-27a-3p%20ENSMUSG00000079614&amp;genes=ENSMUSG00000079614&amp;mirnas=mmu-miR-27a-3p&amp;threshold=0)</a> |
| Chd2 (mmu) ⓘ    | mmu-miR-27a-3p ⓘ |    | 0.768<br><a href="(/DianaTools/index.php?r=microT_CDS/results&amp;keywords=mmu-miR-27a-3p%20ENSMUSG00000078671&amp;genes=ENSMUSG00000078671&amp;mirnas=mmu-miR-27a-3p&amp;threshold=0)">(/DianaTools/index.php?r=microT_CDS/results&amp;keywords=mmu-miR-27a-3p%20ENSMUSG00000078671&amp;genes=ENSMUSG00000078671&amp;mirnas=mmu-miR-27a-3p&amp;threshold=0)</a> |
| Pde7a (mmu) ⓘ   | mmu-miR-27a-3p ⓘ |    | 0.748<br><a href="(/DianaTools/index.php?r=microT_CDS/results&amp;keywords=mmu-miR-27a-3p%20ENSMUSG00000069094&amp;genes=ENSMUSG00000069094&amp;mirnas=mmu-miR-27a-3p&amp;threshold=0)">(/DianaTools/index.php?r=microT_CDS/results&amp;keywords=mmu-miR-27a-3p%20ENSMUSG00000069094&amp;genes=ENSMUSG00000069094&amp;mirnas=mmu-miR-27a-3p&amp;threshold=0)</a> |
| Lmbrd1 (mmu) ⓘ  | mmu-miR-27a-3p ⓘ |    | 0.673<br><a href="(/DianaTools/index.php?r=microT_CDS/results&amp;keywords=mmu-miR-27a-3p%20ENSMUSG00000073725&amp;genes=ENSMUSG00000073725&amp;mirnas=mmu-miR-27a-3p&amp;threshold=0)">(/DianaTools/index.php?r=microT_CDS/results&amp;keywords=mmu-miR-27a-3p%20ENSMUSG00000073725&amp;genes=ENSMUSG00000073725&amp;mirnas=mmu-miR-27a-3p&amp;threshold=0)</a> |
| Lmbrd1 (mmu) ⓘ  | mmu-miR-27a-3p ⓘ |    | 0.673<br><a href="(/DianaTools/index.php?r=microT_CDS/results&amp;keywords=mmu-miR-27a-3p%20ENSMUSG00000073725&amp;genes=ENSMUSG00000073725&amp;mirnas=mmu-miR-27a-3p&amp;threshold=0)">(/DianaTools/index.php?r=microT_CDS/results&amp;keywords=mmu-miR-27a-3p%20ENSMUSG00000073725&amp;genes=ENSMUSG00000073725&amp;mirnas=mmu-miR-27a-3p&amp;threshold=0)</a> |
| Arfgef2 (mmu) ⓘ | mmu-miR-27a-3p ⓘ |  | 0.665<br><a href="(/DianaTools/index.php?r=microT_CDS/results&amp;keywords=mmu-miR-27a-3p%20ENSMUSG00000074582&amp;genes=ENSMUSG00000074582&amp;mirnas=mmu-miR-27a-3p&amp;threshold=0)">(/DianaTools/index.php?r=microT_CDS/results&amp;keywords=mmu-miR-27a-3p%20ENSMUSG00000074582&amp;genes=ENSMUSG00000074582&amp;mirnas=mmu-miR-27a-3p&amp;threshold=0)</a> |
| H2-Q6 (mmu) ⓘ   | mmu-miR-27a-3p ⓘ |  | 0.640<br><a href="(/DianaTools/index.php?r=microT_CDS/results&amp;keywords=mmu-miR-27a-3p%20ENSMUSG00000073409&amp;genes=ENSMUSG00000073409&amp;mirnas=mmu-miR-27a-3p&amp;threshold=0)">(/DianaTools/index.php?r=microT_CDS/results&amp;keywords=mmu-miR-27a-3p%20ENSMUSG00000073409&amp;genes=ENSMUSG00000073409&amp;mirnas=mmu-miR-27a-3p&amp;threshold=0)</a> |
| Peak1 (mmu) ⓘ   | mmu-miR-27a-3p ⓘ |  | 0.618<br><a href="(/DianaTools/index.php?r=microT_CDS/results&amp;keywords=mmu-miR-27a-3p%20ENSMUSG00000074305&amp;genes=ENSMUSG00000074305&amp;mirnas=mmu-miR-27a-3p&amp;threshold=0)">(/DianaTools/index.php?r=microT_CDS/results&amp;keywords=mmu-miR-27a-3p%20ENSMUSG00000074305&amp;genes=ENSMUSG00000074305&amp;mirnas=mmu-miR-27a-3p&amp;threshold=0)</a> |
| Tmppe (mmu) ⓘ   | mmu-miR-27a-3p ⓘ |  | 0.608<br><a href="(/DianaTools/index.php?r=microT_CDS/results&amp;keywords=mmu-miR-27a-3p%20ENSMUSG00000079260&amp;genes=ENSMUSG00000079260&amp;mirnas=mmu-miR-27a-3p&amp;threshold=0)">(/DianaTools/index.php?r=microT_CDS/results&amp;keywords=mmu-miR-27a-3p%20ENSMUSG00000079260&amp;genes=ENSMUSG00000079260&amp;mirnas=mmu-miR-27a-3p&amp;threshold=0)</a> |

We have placed cookies on your device to help make this website and the services we offer better. By using this site, you agree to the use of cookies. [Learn more](#) ([\(/DianaTools/index.php?r=site/terms\)]((/DianaTools/index.php?r=site/terms)))

I accept

|                       |                  |                                                                                      |                                                                                                                                                                                                                        |
|-----------------------|------------------|--------------------------------------------------------------------------------------|------------------------------------------------------------------------------------------------------------------------------------------------------------------------------------------------------------------------|
| Ctdsp2 (mmu) ⓘ        | mmu-miR-27a-3p ⓘ |    | <p><a href="#">0.595</a><br/> <a href="#">(/DianaTools/index.php?r=microT_CDS/results&amp;keywords=mmu-miR-27a-3p%20ENSMUSG00000078429&amp;genes=ENSMUSG00000078429&amp;mirnas=mmu-miR-27a-3p&amp;threshold=0)</a></p> |
| Cry2 (mmu) ⓘ          | mmu-miR-27a-3p ⓘ |    | <p><a href="#">0.582</a><br/> <a href="#">(/DianaTools/index.php?r=microT_CDS/results&amp;keywords=mmu-miR-27a-3p%20ENSMUSG0000068742&amp;genes=ENSMUSG0000068742&amp;mirnas=mmu-miR-27a-3p&amp;threshold=0)</a></p>   |
| Ddi2 (mmu) ⓘ          | mmu-miR-27a-3p ⓘ |    | <p><a href="#">0.581</a><br/> <a href="#">(/DianaTools/index.php?r=microT_CDS/results&amp;keywords=mmu-miR-27a-3p%20ENSMUSG00000078515&amp;genes=ENSMUSG00000078515&amp;mirnas=mmu-miR-27a-3p&amp;threshold=0)</a></p> |
| Klh9 (mmu) ⓘ          | mmu-miR-27a-3p ⓘ |    | <p><a href="#">0.579</a><br/> <a href="#">(/DianaTools/index.php?r=microT_CDS/results&amp;keywords=mmu-miR-27a-3p%20ENSMUSG00000070923&amp;genes=ENSMUSG00000070923&amp;mirnas=mmu-miR-27a-3p&amp;threshold=0)</a></p> |
| Gad1 (mmu) ⓘ          | mmu-miR-27a-3p ⓘ |    | <p><a href="#">0.552</a><br/> <a href="#">(/DianaTools/index.php?r=microT_CDS/results&amp;keywords=mmu-miR-27a-3p%20ENSMUSG0000070880&amp;genes=ENSMUSG0000070880&amp;mirnas=mmu-miR-27a-3p&amp;threshold=0)</a></p>   |
| Ptprz1 (mmu) ⓘ        | mmu-miR-27a-3p ⓘ |    | <p><a href="#">0.550</a><br/> <a href="#">(/DianaTools/index.php?r=microT_CDS/results&amp;keywords=mmu-miR-27a-3p%20ENSMUSG0000068748&amp;genes=ENSMUSG0000068748&amp;mirnas=mmu-miR-27a-3p&amp;threshold=0)</a></p>   |
| 2700089E24Rik (mmu) ⓘ | mmu-miR-27a-3p ⓘ |   | <p><a href="#">0.539</a><br/> <a href="#">(/DianaTools/index.php?r=microT_CDS/results&amp;keywords=mmu-miR-27a-3p%20ENSMUSG00000072704&amp;genes=ENSMUSG00000072704&amp;mirnas=mmu-miR-27a-3p&amp;threshold=0)</a></p> |
| Ccnf (mmu) ⓘ          | mmu-miR-27a-3p ⓘ |  | <p><a href="#">0.534</a><br/> <a href="#">(/DianaTools/index.php?r=microT_CDS/results&amp;keywords=mmu-miR-27a-3p%20ENSMUSG0000072082&amp;genes=ENSMUSG0000072082&amp;mirnas=mmu-miR-27a-3p&amp;threshold=0)</a></p>   |
| Ttpa (mmu) ⓘ          | mmu-miR-27a-3p ⓘ |  | <p><a href="#">0.528</a><br/> <a href="#">(/DianaTools/index.php?r=microT_CDS/results&amp;keywords=mmu-miR-27a-3p%20ENSMUSG00000073988&amp;genes=ENSMUSG00000073988&amp;mirnas=mmu-miR-27a-3p&amp;threshold=0)</a></p> |
| Csf2rb (mmu) ⓘ        | mmu-miR-27a-3p ⓘ |  | <p><a href="#">0.521</a><br/> <a href="#">(/DianaTools/index.php?r=microT_CDS/results&amp;keywords=mmu-miR-27a-3p%20ENSMUSG00000071713&amp;genes=ENSMUSG00000071713&amp;mirnas=mmu-miR-27a-3p&amp;threshold=0)</a></p> |
| St6galnac4 (mmu) ⓘ    | mmu-miR-27a-3p ⓘ |  | <p><a href="#">0.500</a><br/> <a href="#">(/DianaTools/index.php?r=microT_CDS/results&amp;keywords=mmu-miR-27a-3p%20ENSMUSG0000079442&amp;genes=ENSMUSG0000079442&amp;mirnas=mmu-miR-27a-3p&amp;threshold=0)</a></p>   |

We have placed cookies on your device to help make this website and the services we offer better. By using this site, you agree to the use of cookies. [Learn more](#) ([/DianaTools/index.php?r=site/terms](#)).

I accept



|                  |                  |                                                                                      |                                                                                                                                                                                                                                                                                                                                                                                  |
|------------------|------------------|--------------------------------------------------------------------------------------|----------------------------------------------------------------------------------------------------------------------------------------------------------------------------------------------------------------------------------------------------------------------------------------------------------------------------------------------------------------------------------|
| Mob3b (mmu) ⓘ    | mmu-miR-27a-3p ⓘ |    | <a href="#">0.492</a><br><a href="(/DianaTools/index.php?r=microT_CDS/results&amp;keywords=mmu-miR-27a-3p%20ENSMUSG00000073910&amp;genes=ENSMUSG00000073910&amp;mirnas=mmu-miR-27a-3p&amp;threshold=0)">(/DianaTools/index.php?r=microT_CDS/results&amp;keywords=mmu-miR-27a-3p%20ENSMUSG00000073910&amp;genes=ENSMUSG00000073910&amp;mirnas=mmu-miR-27a-3p&amp;threshold=0)</a> |
| Mob3b (mmu) ⓘ    | mmu-miR-27a-3p ⓘ |    | <a href="#">0.492</a><br><a href="(/DianaTools/index.php?r=microT_CDS/results&amp;keywords=mmu-miR-27a-3p%20ENSMUSG00000073910&amp;genes=ENSMUSG00000073910&amp;mirnas=mmu-miR-27a-3p&amp;threshold=0)">(/DianaTools/index.php?r=microT_CDS/results&amp;keywords=mmu-miR-27a-3p%20ENSMUSG00000073910&amp;genes=ENSMUSG00000073910&amp;mirnas=mmu-miR-27a-3p&amp;threshold=0)</a> |
| Slc17a7 (mmu) ⓘ  | mmu-miR-27a-3p ⓘ |    | <a href="#">0.485</a><br><a href="(/DianaTools/index.php?r=microT_CDS/results&amp;keywords=mmu-miR-27a-3p%20ENSMUSG00000070570&amp;genes=ENSMUSG00000070570&amp;mirnas=mmu-miR-27a-3p&amp;threshold=0)">(/DianaTools/index.php?r=microT_CDS/results&amp;keywords=mmu-miR-27a-3p%20ENSMUSG00000070570&amp;genes=ENSMUSG00000070570&amp;mirnas=mmu-miR-27a-3p&amp;threshold=0)</a> |
| Amy1 (mmu) ⓘ     | mmu-miR-27a-3p ⓘ |    | <a href="#">0.482</a><br><a href="(/DianaTools/index.php?r=microT_CDS/results&amp;keywords=mmu-miR-27a-3p%20ENSMUSG00000074264&amp;genes=ENSMUSG00000074264&amp;mirnas=mmu-miR-27a-3p&amp;threshold=0)">(/DianaTools/index.php?r=microT_CDS/results&amp;keywords=mmu-miR-27a-3p%20ENSMUSG00000074264&amp;genes=ENSMUSG00000074264&amp;mirnas=mmu-miR-27a-3p&amp;threshold=0)</a> |
| Mup20 (mmu) ⓘ    | mmu-miR-27a-3p ⓘ |    | <a href="#">0.475</a><br><a href="(/DianaTools/index.php?r=microT_CDS/results&amp;keywords=mmu-miR-27a-3p%20ENSMUSG00000078672&amp;genes=ENSMUSG00000078672&amp;mirnas=mmu-miR-27a-3p&amp;threshold=0)">(/DianaTools/index.php?r=microT_CDS/results&amp;keywords=mmu-miR-27a-3p%20ENSMUSG00000078672&amp;genes=ENSMUSG00000078672&amp;mirnas=mmu-miR-27a-3p&amp;threshold=0)</a> |
| H2-D1 (mmu) ⓘ    | mmu-miR-27a-3p ⓘ |    | <a href="#">0.469</a><br><a href="(/DianaTools/index.php?r=microT_CDS/results&amp;keywords=mmu-miR-27a-3p%20ENSMUSG00000073411&amp;genes=ENSMUSG00000073411&amp;mirnas=mmu-miR-27a-3p&amp;threshold=0)">(/DianaTools/index.php?r=microT_CDS/results&amp;keywords=mmu-miR-27a-3p%20ENSMUSG00000073411&amp;genes=ENSMUSG00000073411&amp;mirnas=mmu-miR-27a-3p&amp;threshold=0)</a> |
| Bcap (mmu) ⓘ     | mmu-miR-27a-3p ⓘ |    | <a href="#">0.467</a><br><a href="(/DianaTools/index.php?r=microT_CDS/results&amp;keywords=mmu-miR-27a-3p%20ENSMUSG00000067787&amp;genes=ENSMUSG00000067787&amp;mirnas=mmu-miR-27a-3p&amp;threshold=0)">(/DianaTools/index.php?r=microT_CDS/results&amp;keywords=mmu-miR-27a-3p%20ENSMUSG00000067787&amp;genes=ENSMUSG00000067787&amp;mirnas=mmu-miR-27a-3p&amp;threshold=0)</a> |
| Ii2rb (mmu) ⓘ    | mmu-miR-27a-3p ⓘ |  | <a href="#">0.467</a><br><a href="(/DianaTools/index.php?r=microT_CDS/results&amp;keywords=mmu-miR-27a-3p%20ENSMUSG00000068227&amp;genes=ENSMUSG00000068227&amp;mirnas=mmu-miR-27a-3p&amp;threshold=0)">(/DianaTools/index.php?r=microT_CDS/results&amp;keywords=mmu-miR-27a-3p%20ENSMUSG00000068227&amp;genes=ENSMUSG00000068227&amp;mirnas=mmu-miR-27a-3p&amp;threshold=0)</a> |
| AW112010 (mmu) ⓘ | mmu-miR-27a-3p ⓘ |  | <a href="#">0.465</a><br><a href="(/DianaTools/index.php?r=microT_CDS/results&amp;keywords=mmu-miR-27a-3p%20ENSMUSG00000075010&amp;genes=ENSMUSG00000075010&amp;mirnas=mmu-miR-27a-3p&amp;threshold=0)">(/DianaTools/index.php?r=microT_CDS/results&amp;keywords=mmu-miR-27a-3p%20ENSMUSG00000075010&amp;genes=ENSMUSG00000075010&amp;mirnas=mmu-miR-27a-3p&amp;threshold=0)</a> |
| Tmem240 (mmu) ⓘ  | mmu-miR-27a-3p ⓘ |  | <a href="#">0.456</a><br><a href="(/DianaTools/index.php?r=microT_CDS/results&amp;keywords=mmu-miR-27a-3p%20ENSMUSG00000084845&amp;genes=ENSMUSG00000084845&amp;mirnas=mmu-miR-27a-3p&amp;threshold=0)">(/DianaTools/index.php?r=microT_CDS/results&amp;keywords=mmu-miR-27a-3p%20ENSMUSG00000084845&amp;genes=ENSMUSG00000084845&amp;mirnas=mmu-miR-27a-3p&amp;threshold=0)</a> |
| Pnmal2 (mmu) ⓘ   | mmu-miR-27a-3p ⓘ |  | <a href="#">0.450</a><br><a href="(/DianaTools/index.php?r=microT_CDS/results&amp;keywords=mmu-miR-27a-3p%20ENSMUSG00000070802&amp;genes=ENSMUSG00000070802&amp;mirnas=mmu-miR-27a-3p&amp;threshold=0)">(/DianaTools/index.php?r=microT_CDS/results&amp;keywords=mmu-miR-27a-3p%20ENSMUSG00000070802&amp;genes=ENSMUSG00000070802&amp;mirnas=mmu-miR-27a-3p&amp;threshold=0)</a> |

We have placed cookies on your device to help make this website and the services we offer better. By using this site, you agree to the use of cookies. [Learn more](#) ([/DianaTools/index.php?r=site/terms]((/DianaTools/index.php?r=site/terms))).

I accept

|                   |                  |    |   |
|-------------------|------------------|----|---|
| Lyar (mmu) ⓘ      | mmu-miR-27a-3p ⓘ | IP | - |
| Clk2 (mmu) ⓘ      | mmu-miR-27a-3p ⓘ | IP | - |
| Peak1 (mmu) ⓘ     | mmu-miR-27a-3p ⓘ | IP | - |
| Cgn (mmu) ⓘ       | mmu-miR-27a-3p ⓘ | IP | - |
| Mup9 (mmu) ⓘ      | mmu-miR-27a-3p ⓘ | IP | - |
| Ang (mmu) ⓘ       | mmu-miR-27a-3p ⓘ | IP | - |
| Igtp (mmu) ⓘ      | mmu-miR-27a-3p ⓘ | IP | - |
| Ceacam1 (mmu) ⓘ   | mmu-miR-27a-3p ⓘ | IP | - |
| Eif2s2 (mmu) ⓘ    | mmu-miR-27a-3p ⓘ | IP | - |
| Arfp1 (mmu) ⓘ     | mmu-miR-27a-3p ⓘ | IP | - |
| Zbtb34 (mmu) ⓘ    | mmu-miR-27a-3p ⓘ | IP | - |
| Msi2 (mmu) ⓘ      | mmu-miR-27a-3p ⓘ | IP | - |
| Dgkd (mmu) ⓘ      | mmu-miR-27a-3p ⓘ | IP | - |
| Fat3 (mmu) ⓘ      | mmu-miR-27a-3p ⓘ | IP | - |
| Zfp664 (mmu) ⓘ    | mmu-miR-27a-3p ⓘ | IP | - |
| Prnp (mmu) ⓘ      | mmu-miR-27a-3p ⓘ | IP | - |
| Ifi47 (mmu) ⓘ     | mmu-miR-27a-3p ⓘ | IP | - |
| Ahnak (mmu) ⓘ     | mmu-miR-27a-3p ⓘ | IP | - |
| Gng3 (mmu) ⓘ      | mmu-miR-27a-3p ⓘ | IP | - |
| Zfp563 (mmu) ⓘ    | mmu-miR-27a-3p ⓘ | IP | - |
| Slc7a14 (mmu) ⓘ   | mmu-miR-27a-3p ⓘ | IP | - |
| Dolk (mmu) ⓘ      | mmu-miR-27a-3p ⓘ | IP | - |
| Tm9sf4 (mmu) ⓘ    | mmu-miR-27a-3p ⓘ | IP | - |
| Tm9sf4 (mmu) ⓘ    | mmu-miR-27a-3p ⓘ | IP | - |
| Gng5 (mmu) ⓘ      | mmu-miR-27a-3p ⓘ | IP | - |
| Fnbp1 (mmu) ⓘ     | mmu-miR-27a-3p ⓘ | IP | - |
| Snmp40 (mmu) ⓘ    | mmu-miR-27a-3p ⓘ | IP | - |
| Snmp40 (mmu) ⓘ    | mmu-miR-27a-3p ⓘ | IP | - |
| Serpina1e (mmu) ⓘ | mmu-miR-27a-3p ⓘ | IP | - |
| Zfp942 (mmu) ⓘ    | mmu-miR-27a-3p ⓘ | IP | - |
| Arpc4 (mmu) ⓘ     | mmu-miR-27a-3p ⓘ | IP | - |
| Zcchc3 (mmu) ⓘ    | mmu-miR-27a-3p ⓘ | IP | - |

We have placed cookies on your device to help make this website and the services we offer better. By using this site, you agree to the use of cookies. [Learn more \(/DianaTools/index.php?r=site/terms\)](#).

I accept

|                |                  |    |   |
|----------------|------------------|----|---|
| Zcchc3 (mmu) ⓘ | mmu-miR-27a-3p ⓘ | IP | - |
| Epc2 (mmu) ⓘ   | mmu-miR-27a-3p ⓘ | IP | - |
| Psme3 (mmu) ⓘ  | mmu-miR-27a-3p ⓘ | IP | - |
| Chchd2 (mmu) ⓘ | mmu-miR-27a-3p ⓘ | IP | - |
| Hba-a1 (mmu) ⓘ | mmu-miR-27a-3p ⓘ | IP | - |
| Csde1 (mmu) ⓘ  | mmu-miR-27a-3p ⓘ | IP | - |
| Celsr2 (mmu) ⓘ | mmu-miR-27a-3p ⓘ | IP | - |
| Bmpr2 (mmu) ⓘ  | mmu-miR-27a-3p ⓘ | IP | - |
| Bmpr2 (mmu) ⓘ  | mmu-miR-27a-3p ⓘ | IP | - |
| Syt11 (mmu) ⓘ  | mmu-miR-27a-3p ⓘ | IP | - |
| Rhog (mmu) ⓘ   | mmu-miR-27a-3p ⓘ | IP | - |

We have placed cookies on your device to help make this website and the services we offer better. By using this site, you agree to the use of cookies. [Learn more \(/DianaTools/index.php?r=site/terms\)](/DianaTools/index.php?r=site/terms).

I accept
