# Supplementary material for: miRNA-27a is essential for bone remodeling by modulating p62-mediated osteoclast signaling
Source: eLife. 2023 Feb 8;12:e79768. doi: 10.7554/eLife.79768 (PMC9946445; doi:10.7554/eLife.79768)
Supplement: Figure 1—figure supplement 1—source data 1. [file elife-79768-fig1-figsupp1-data1.xlsx]

## Sheet: Sheet1
Genotype	Skull Width (mm)	Skull Length (mm)	Femur Length (mm)	Tibia Length (mm)	Humerus Length (mm)	Radius Length (mm)
Control	5.85	6.38	2.03	2.55	2.49	2.21
Control	5.54	6.13	1.96	2.33	2.34	2.07
Control	5.96	6.05	2.17	2.51	2.57	2.46
Control	5.58	6.2	1.94	2.3	2.34	2.03
Control	5.5	6.36	2.14	2.76	2.65	2.46
Control	5.56	6.11	2.17	2.41	2.46	2.26
Control	6.31	6.66	2.23	2.61	2.79	2.54
Control	5.85	6.32	2.01	2.28	2.33	2.13
Control	5.51	6.13	1.89	2.34	2.13	2.07
∆Mir23a~27a	5.51	6.08	1.88	2.22	2.24	2.08
∆Mir23a~27a	6.05	6.43	2.05	2.57	2.58	2.46
∆Mir23a~27a	6.08	6.32	2.09	2.52	2.52	2.98
∆Mir23a~27a	5.98	5.79	2.15	2.5	2.52	2.43
∆Mir23a~27a	5.79	5.59	1.9	2.25	2.22	2.1
∆Mir23a~27a	5.86	6.28	2.14	2.6	2.46	2.34
∆Mir23a~27a	5.79	5.83	2.08	2.48	2.42	2.33
∆Mir23a~27a	5.98	6.33	2.06	2.49	2.49	2.3
