# Supplementary material for: miRNA-27a is essential for bone remodeling by modulating p62-mediated osteoclast signaling
Source: eLife. 2023 Feb 8;12:e79768. doi: 10.7554/eLife.79768 (PMC9946445; doi:10.7554/eLife.79768)
Supplement: Figure 1—figure supplement 2—source data 1. [file elife-79768-fig1-figsupp2-data1.xlsx]

## Sheet: Fig.1-S2D
7M Female
Genotype	BV/TV (%)
Control-1	6.9
Control-2	4
Control-3	7.8
∆Mir23a~27a-1	3.8
∆Mir23a~27a-2	1.5
∆Mir23a~27a-3	0.6
