# Supplementary material for: miRNA-27a is essential for bone remodeling by modulating p62-mediated osteoclast signaling
Source: eLife. 2023 Feb 8;12:e79768. doi: 10.7554/eLife.79768 (PMC9946445; doi:10.7554/eLife.79768)
Supplement: Figure 1—figure supplement 3—source data 1. [file elife-79768-fig1-figsupp3-data1.xlsx]

## Sheet: Fig.1-S3
3M Female				3M Male
Genotype	Ct.Th (mm)		Genotype	Ct.Th (mm)
Control-1	0.194		Control-1	0.222
Control-2	0.221		Control-2	0.243
Control-3	0.243		Control-3	0.276
Control-4	0.255		Control-4	0.299
Control-5	0.233		Control-5	0.304
∆Mir23a~27a-1	0.213		∆Mir23a~27a-1	0.247
∆Mir23a~27a-2	0.235		∆Mir23a~27a-2	0.238
∆Mir23a~27a-3	0.214		∆Mir23a~27a-3	0.231
∆Mir23a~27a-4	0.222		∆Mir23a~27a-4	0.245
∆Mir23a~27a-5	0.214		∆Mir23a~27a-5	0.255
