# Supplementary material for: miRNA-27a is essential for bone remodeling by modulating p62-mediated osteoclast signaling
Source: eLife. 2023 Feb 8;12:e79768. doi: 10.7554/eLife.79768 (PMC9946445; doi:10.7554/eLife.79768)
Supplement: Figure 1—source data 1. [file elife-79768-fig1-data1.xlsx]

## Sheet: Fig.1G 
3M Female				3M Male
	Genotype	BV/TV(%)			Genotype	BV/TV(%)
BV/TV(%)	Control-1	10.6		BV/TV(%)	Control-1	20.5
	Control-2	4.8			Control-2	19.8
	Control-3	11.7			Control-3	18.9
	Control-4	15.8			Control-4	19
	Control-5	9.1			Control-5	22.5
	Control-6	18.6			Control-6	19.9
	Control-7	9.8			Control-7	21.7
	∆Mir23a~27a-1	4.1			∆Mir23a~27a-1	14.9
	∆Mir23a~27a-2	0.7			∆Mir23a~27a-2	14.8
	∆Mir23a~27a-3	5.9			∆Mir23a~27a-3	20.5
	∆Mir23a~27a-4	3.4			∆Mir23a~27a-4	7.6
	∆Mir23a~27a-5	1.2			∆Mir23a~27a-5	9.3
	∆Mir23a~27a-6	2.1			∆Mir23a~27a-6	16.7
	∆Mir23a~27a-7	0.5			∆Mir23a~27a-7	15.4

## Sheet: Fig.1H 
3M Female				3M Male
	Genotype	BV/TV(%)			Genotype	BV/TV(%)
BV/TV(%)	Control-1	22.3		BV/TV(%)	Control-1	21.32
	Control-2	25.91			Control-2	28.12
	Control-3	29.35			Control-3	19.9
	Control-4	25.13			∆Mir23a~27a-1	14.08
	∆Mir23a~27a-1	15.06			∆Mir23a~27a-2	16.16
	∆Mir23a~27a-2	10.47			∆Mir23a~27a-3	9.33
	∆Mir23a~27a-3	13.87
	∆Mir23a~27a-4	12.43
