# Supplementary material for: miRNA-27a is essential for bone remodeling by modulating p62-mediated osteoclast signaling
Source: eLife. 2023 Feb 8;12:e79768. doi: 10.7554/eLife.79768 (PMC9946445; doi:10.7554/eLife.79768)
Supplement: Figure 2—figure supplement 1—source data 1. [file elife-79768-fig2-figsupp1-data1.xlsx]

## Sheet: Fig.S3A
3M Female				3M Male
	Genotype				Genotype
Ct	Control-1	0.3765		Ct	Control-1	0.3589
	Control-2	0.4693			Control-2	0.0642
	Control-3	0.2385			Control-3	0.2607
	∆Mir23a~27a-1	0.3177			∆Mir23a~27a-1	0.2029
	∆Mir23a~27a-2	0.7051			∆Mir23a~27a-2	0.532
	∆Mir23a~27a-3	0.4898			∆Mir23a~27a-3	0.1616
Tb	Control-1	0.1909		Tb	Control-1	0.321
	Control-2	0.3809			Control-2	0.2762
	Control-3	0.6418			Control-3	0.4801
	∆Mir23a~27a-1	0.23			∆Mir23a~27a-1	0.3659
	∆Mir23a~27a-2	0.2013			∆Mir23a~27a-2	0.5784
	∆Mir23a~27a-3	0.4959			∆Mir23a~27a-3	0.2005

## Sheet: Fig.S3B
3M Female				3M Male
Cell number	Genotype			Cell number	Genotype
Col1	Control-1	35.1342		Col1	Control-1	58.692
	Control-2	31.1825			Control-2	49.0258
	Control-3	35.1342			Control-3	29.5427
	Control-4	31.8328			Control-4	38.8765
	Control-5	38.5821			Control-5	46.381
	∆Mir23a~27a-1	38.3623			∆Mir23a~27a-1	51.3141
	∆Mir23a~27a-2	38.3623			∆Mir23a~27a-2	38.1693
	∆Mir23a~27a-3	37.7056			∆Mir23a~27a-3	30.8874
	∆Mir23a~27a-4	33.3189			∆Mir23a~27a-4	32.9451
	∆Mir23a~27a-5	22.244		OPN	Control-1	5.04255
OPN	Control-1	9.98264			Control-2	14.8242
	Control-2	23.2714			Control-3	12.8535
	Control-3	21.1601			Control-4	15.4586
	Control-4	21.0041			Control-5	16.2515
	Control-5	24.1028			∆Mir23a~27a-1	24.8378
	∆Mir23a~27a-1	8.55096			∆Mir23a~27a-2	11.3152
	∆Mir23a~27a-2	22.9008			∆Mir23a~27a-3	8
	∆Mir23a~27a-3	29.3143			∆Mir23a~27a-4	25.4925
	∆Mir23a~27a-4	23.9537			∆Mir23a~27a-5	19.9759
	∆Mir23a~27a-5	21.119
