# Supplementary material for: miRNA-27a is essential for bone remodeling by modulating p62-mediated osteoclast signaling
Source: eLife. 2023 Feb 8;12:e79768. doi: 10.7554/eLife.79768 (PMC9946445; doi:10.7554/eLife.79768)
Supplement: Figure 2—source data 1. [file elife-79768-fig2-data1.xlsx]

## Sheet: Fig.2
3M Female				3M Male
	Genotype				Genotype
N.Oc/T.Ar (mm2)	Control-1	547.368		N.Oc/T.Ar (mm2)	Control-1	226.86
	Control-2	741.16			Control-2	390.734
	Control-3	588.726			Control-3	407.917
	Control-4	264.582			Control-4	230.958
	Control-5	371.733			Control-5	305.104
	∆Mir23a~27a-1	2742.93			∆Mir23a~27a-1	606.399
	∆Mir23a~27a-2	1525.97			∆Mir23a~27a-2	1447.83
	∆Mir23a~27a-3	1559.5			∆Mir23a~27a-3	960.236
	∆Mir23a~27a-4	1261.41			∆Mir23a~27a-4	1123.2
	∆Mir23a~27a-5	1148.17			∆Mir23a~27a-5	826.037
Oc.S/BS (%)	Control-1	11.311		Oc.S/BS (%)	Control-1	4.86042
	Control-2	15.6884			Control-2	5.5158
	Control-3	13.5012			Control-3	8.58499
	Control-4	8.5704			Control-4	7.14564
	Control-5	11.1313			Control-5	10.1742
	∆Mir23a~27a-1	28.1429			∆Mir23a~27a-1	17.5113
	∆Mir23a~27a-2	29.5863			∆Mir23a~27a-2	25.0119
	∆Mir23a~27a-3	29.5003			∆Mir23a~27a-3	26.0098
	∆Mir23a~27a-4	25.5962			∆Mir23a~27a-4	22.9899
	∆Mir23a~27a-5	19.21			∆Mir23a~27a-5	26.0924
N.Oc/BS (mm)	Control-1	9.23912		N.Oc/BS (mm)	Control-1	5.17244
	Control-2	12.8229			Control-2	6.82192
	Control-3	9.35536			Control-3	8.29861
	Control-4	5.12803			Control-4	5.29623
	Control-5	7.19376			Control-5	8.08616
	∆Mir23a~27a-1	25.9228			∆Mir23a~27a-1	10.8322
	∆Mir23a~27a-2	20.0621			∆Mir23a~27a-2	16.0455
	∆Mir23a~27a-3	22.18			∆Mir23a~27a-3	14.0462
	∆Mir23a~27a-4	16.9482			∆Mir23a~27a-4	14.7377
	∆Mir23a~27a-5	11.8801			∆Mir23a~27a-5	15.8117
No. CTSK+/BS (mm)	Control-1	6.76361		No. CTSK+/BS (mm)	Control-1	1.42248
	Control-2	8.13609			Control-2	10.9344
	Control-3	6.68765			Control-3	9.03274
	Control-4	3.54997			Control-4	4.46713
	Control-5	6.49351			Control-5	4.72394
	∆Mir23a~27a-1	19.4774			∆Mir23a~27a-1	13.75
	∆Mir23a~27a-2	9.96885			∆Mir23a~27a-2	25.2182
	∆Mir23a~27a-3	13.838			∆Mir23a~27a-3	10.7317
	∆Mir23a~27a-4	14.3885			∆Mir23a~27a-4	13.9816
	∆Mir23a~27a-5	11.7707			∆Mir23a~27a-5	12.4167
