# Supplementary material for: miRNA-27a is essential for bone remodeling by modulating p62-mediated osteoclast signaling
Source: eLife. 2023 Feb 8;12:e79768. doi: 10.7554/eLife.79768 (PMC9946445; doi:10.7554/eLife.79768)
Supplement: Figure 3—source data 1. [file elife-79768-fig3-data1.xlsx]

## Sheet: Fig.3B
3M Female				3M Male
	Samples	%			Samples	%
Monocyte (CD11b+/Gr-1 monocyte)	Control-1	22.73		Monocyte (CD11b+/Gr-1 monocyte)	Control-1	17.96
	Control-2	23.2			Control-2	18.86
	Control-3	19.7			Control-3	17.92
	∆Mir23~27a-1	14.59			∆Mir23~27a-1	21.08
	∆Mir23~27a-2	18.97			∆Mir23~27a-2	16.74
	∆Mir23~27a-3	18.14			∆Mir23~27a-3	17.17
Dendritic cells (CD11b+/CD11c+)	Control-1	2.28		Dendritic cells (CD11b+/CD11c+)	Control-1	1.23
	Control-2	3.18			Control-2	1.2
	Control-3	3.13			Control-3	1.81
	∆Mir23~27a-1	1.74			∆Mir23~27a-1	0.8
	∆Mir23~27a-2	3.22			∆Mir23~27a-2	1.73
	∆Mir23~27a-3	2.77			∆Mir23~27a-3	1.75

## Sheet: Fig.3C
3M Female				3M Male
Cell number	Genotype	OC number		Cell number	Genotype	OC number
2.5x10E4	Control-1	8.33333		2.5x10E4	Control-1	33.3333
	Control-2	34			Control-2	74.6667
	Control-3	13.3333			Control-3	39
	∆Mir23~27a-1	157.667			∆Mir23~27a-1	108.333
	∆Mir23~27a-2	134.333			∆Mir23~27a-2	132.667
	∆Mir23~27a-3	72.6667			∆Mir23~27a-3	107.333
5x10E4	Control-1	50.3333		5x10E4	Control-1	138.667
	Control-2	134			Control-2	71.3333
	Control-3	50.3333			Control-3	121.333
	∆Mir23~27a-1	239			∆Mir23~27a-1	227.667
	∆Mir23~27a-2	225			∆Mir23~27a-2	154.667
	∆Mir23~27a-3	143			∆Mir23~27a-3	228.667
