# Supplementary material for: miRNA-27a is essential for bone remodeling by modulating p62-mediated osteoclast signaling
Source: eLife. 2023 Feb 8;12:e79768. doi: 10.7554/eLife.79768 (PMC9946445; doi:10.7554/eLife.79768)
Supplement: Figure 4—figure supplement 2—source data 1. [file elife-79768-fig4-figsupp2-data1.xlsx]

## Sheet: Fig.4-S2
3M Female			3M Male
Genotype	Ct.Th (mm)		Genotype	Ct.Th (mm)
Control-1	0.246		Control-1	0.269
Control-2	0.258		Control-2	0.282
Control-3	0.23		Control-3	0.284
Control-4	0.219		Control-4	0.245
Control-5	0.242		∆Mir27a-1	0.253
∆Mir27a-1	0.212		∆Mir27a-2	0.253
∆Mir27a-2	0.221		∆Mir27a-3	0.227
∆Mir27a-3	0.206		∆Mir27a-4	0.249
∆Mir27a-4	0.225
∆Mir27a-5	0.227
