# Supplementary material for: miRNA-27a is essential for bone remodeling by modulating p62-mediated osteoclast signaling
Source: eLife. 2023 Feb 8;12:e79768. doi: 10.7554/eLife.79768 (PMC9946445; doi:10.7554/eLife.79768)
Supplement: Figure 4—source data 1. [file elife-79768-fig4-data1.xlsx]

## Sheet: Fig.4G
3M Female				3M Male
	Genotype	BV/TV(%)			Genotype	BV/TV(%)
BV/TV(%)	Control-1	7.2		BV/TV(%)	Control-1	16.9
	Control-2	11.3			Control-2	22.7
	Control-3	11.5			Control-3	27.8
	Control-4	1.9			Control-4	29.9
	Control-5	9.4			∆Mir27-1	15.9
	Control-6	11.1			∆Mir27-2	7.1
	Control-7	7.4			∆Mir27-3	2.8
	∆Mir27-1	2.2			∆Mir27-4	11.2
	∆Mir27-2	1.6
	∆Mir27-3	1.5
	∆Mir27-4	1.8
	∆Mir27-5	0.9

## Sheet: Fig.4H
3M Female				3MMale
	Genotype	BV/TV(%)			Genotype	BV/TV(%)
BV/TV(%)	Control-1	21.71		BV/TV(%)	Control-1	18.81
	Control-2	19.8			Control-2	21.19
	Control-3	22.74			Control-3	23.91
	∆Mir27-1	9.89			∆Mir27-1	15.09
	∆Mir27-2	17.53			∆Mir27-2	14.63
	∆Mir27-3	12.36			∆Mir27-3	10.66
