# Supplementary material for: miRNA-27a is essential for bone remodeling by modulating p62-mediated osteoclast signaling
Source: eLife. 2023 Feb 8;12:e79768. doi: 10.7554/eLife.79768 (PMC9946445; doi:10.7554/eLife.79768)
Supplement: Figure 5—figure supplement 1—source data 1. [file elife-79768-fig5-figsupp1-data1.xlsx]

## Sheet: Fig.5-S1A
3M Female				3M Male
Cell number	Genotype			Cell number	Genotype
Ct	Control-1	0.6323		Ct	Control-1	0.0561
	Control-2	0.2946			Control-2	0.3137
	Control-3	0.4389			Control-3	0.1321
	∆Mir27a-1	0.6974			∆Mir27a-1	0.219
	∆Mir27a-2	0			∆Mir27a-2	0.4938
	∆Mir27a-3	0.3398			∆Mir27a-3	0.1782
Tb	Control-1	0.2546		Tb	Control-1	0.3165
	Control-2	0.613			Control-2	0.4222
	Control-3	0.5068			Control-3	0.4284
	∆Mir27a-1	0.4089			∆Mir27a-1	0.4181
	∆Mir27a-2	0.4879			∆Mir27a-2	0.3427
	∆Mir27a-3	0.3248			∆Mir27a-3	0.3715

## Sheet: Fig.5-S1B
3M Female						3M Male
Cell number	Genotype					Cell number	Genotype
Col1	Control-1	38.1679				Col1	Control-1	22.3401
	Control-2	32.9376					Control-2	20.9955
	Control-3	35.6228					Control-3	19.6914
	Control-4	28.1545					Control-4	20.7729
	Control-5	29.7863					∆Mir27a-1	22.3169
	∆Mir27a-1	25.9689					∆Mir27a-2	29.0409
	∆Mir27a-2	33.6301					∆Mir27a-3	28.9798
	∆Mir27a-3	26.5631					∆Mir27a-4	16.6979
	∆Mir27a-4	26.2048				OPN	Control-1	18.2587
	∆Mir27a-5	21.6294					Control-2	18.4871
OPN	Control-1	28.5242					Control-3	29.0542
	Control-2	25.0284					Control-4	11.4496
	Control-3	29.3034					∆Mir27a-1	16.8776
	Control-4	19.4938					∆Mir27a-2	18.9911
	Control-5	45.8895					∆Mir27a-3	27.0619
	∆Mir27a-1	22.052					∆Mir27a-4	12.5773
	∆Mir27a-2	24.4176
	∆Mir27a-3	33.7047
	∆Mir27a-4	16.5703
	∆Mir27a-5	17.7577
