# Supplementary material for: miRNA-27a is essential for bone remodeling by modulating p62-mediated osteoclast signaling
Source: eLife. 2023 Feb 8;12:e79768. doi: 10.7554/eLife.79768 (PMC9946445; doi:10.7554/eLife.79768)
Supplement: Figure 5—figure supplement 3—source data 1. [file elife-79768-fig5-figsupp3-data1.xlsx]

## Sheet: Fig.5-S3B
3M Female				3M Male
	Samples	%			Samples	%
Monocyte (CD11b+/Gr-1 monocyte)	Control-1	22.73		Monocyte (CD11b+/Gr-1 monocyte)	Control-1	17.96
	Control-2	23.2			Control-2	18.86
	Control-3	19.7			Control-3	17.92
	∆Mir27a-1	14.59			∆Mir27a-1	21.08
	∆Mir27a-2	18.97			∆Mir27a-2	16.74
	∆Mir27a-3	18.14			∆Mir27a-3	17.17
Dendritic cells (CD11b+/CD11c+)	Control-1	2.32		Dendritic cells (CD11b+/CD11c+)	Control-1	1.23
	Control-2	3.14			Control-2	1.2
	Control-3	1.33			Control-3	1.81
	∆Mir27a-1	2.41			∆Mir27a-1	0.8
	∆Mir27a-2	3.16			∆Mir27a-2	1.73
	∆Mir27a-3	1.95			∆Mir27a-3	1.75
