# Supplementary material for: miRNA-27a is essential for bone remodeling by modulating p62-mediated osteoclast signaling
Source: eLife. 2023 Feb 8;12:e79768. doi: 10.7554/eLife.79768 (PMC9946445; doi:10.7554/eLife.79768)
Supplement: Figure 5—source data 1. [file elife-79768-fig5-data1.xlsx]

## Sheet: Fig.5A
3M Female				3M Male
	Genotype				Genotype
N.Oc/T.Ar (mm2)	Control-1	369.576		N.Oc/T.Ar (mm2)	Control-1	49.0963
	Control-2	174.088			Control-2	176.047
	Control-3	330.799			Control-3	97.7033
	Control-4	480.43			Control-4	49.1878
	∆Mir27a-1	1169.05			∆Mir27a-1	1155.04
	∆Mir27a-2	658.57			∆Mir27a-2	641.257
	∆Mir27a-3	1615.75			∆Mir27a-3	1447.17
	∆Mir27a-4	910.341			∆Mir27a-4	681.048
	∆Mir27a-5	815.702		Oc.S/BS (%)	Control-1	0.998728
Oc.S/BS (%)	Control-1	10.5568			Control-2	6.61956
	Control-2	3.38856			Control-3	3.36426
	Control-3	7.96696			Control-4	1.52961
	Control-4	9.35067			∆Mir27a-1	17.5009
	∆Mir27a-1	22.0293			∆Mir27a-2	22.4892
	∆Mir27a-2	32.4731			∆Mir27a-3	17.9847
	∆Mir27a-3	29.4702			∆Mir27a-4	24.2227
	∆Mir27a-4	17.0727		N.Oc/BS (mm)	Control-1	0.837404
	∆Mir27a-5	11.6127			Control-2	4.1385
N.Oc/BS (mm)	Control-1	4.75686			Control-3	1.66883
	Control-2	2.66247			Control-4	1.00214
	Control-3	4.99501			∆Mir27a-1	15.7931
	Control-4	5.59268			∆Mir27a-2	10.8109
	∆Mir27a-1	15.0883			∆Mir27a-3	11.7787
	∆Mir27a-2	12.7961			∆Mir27a-4	14.7634
	∆Mir27a-3	16.2003		No. CTSK+/BS (mm)	Control-1	4.83092
	∆Mir27a-4	10.7157			Control-2	2.85612
	∆Mir27a-5	5.28683			Control-3	5.95474
No. CTSK+/BS (mm)	Control-1	2.52071			Control-4	5.51572
	Control-2	4.64396			∆Mir27a-1	20.636
	Control-3	4.19141			∆Mir27a-2	11.7596
	Control-4	4.60653			∆Mir27a-3	11.6857
	Control-5	5.06512			∆Mir27a-4	10.0454
	∆Mir27a-1	15.2642
	∆Mir27a-2	36.6326
	∆Mir27a-3	11.7594
	∆Mir27a-4	9.73574
	∆Mir27a-5	16.3613

## Sheet: Fig.5B
3M Female				3M Male
Cell number	Genotype	OC number		Cell number	Genotype	OC number
2.5x10E4	Control-1	21		2.5x10E4	Control-1	21
	Control-2	48			Control-2	47
	Control-3	33			Control-3	32
	∆Mir27a-1	119			∆Mir27a-1	93
	∆Mir27a-2	165			∆Mir27a-2	105
	∆Mir27a-3	119			∆Mir27a-3	127
5x10E4	Control-1	103		5x10E4	Control-1	134
	Control-2	156			Control-2	146
	Control-3	143			Control-3	136
	∆Mir27a-1	226			∆Mir27a-1	235
	∆Mir27a-2	234			∆Mir27a-2	243
	∆Mir27a-3	215			∆Mir27a-3	205

## Sheet: Fig.5C
Cell	Lentivirus	OC number
WT-1	GFP	181
WT-2	GFP	195
WT-3	GFP	182
WT-4	MIR27a	90
WT-5	MIR27a	115
WT-6	MIR27a	136
