# Supplementary material for: miRNA-27a is essential for bone remodeling by modulating p62-mediated osteoclast signaling
Source: eLife. 2023 Feb 8;12:e79768. doi: 10.7554/eLife.79768 (PMC9946445; doi:10.7554/eLife.79768)
Supplement: Figure 6—source data 1. [file elife-79768-fig6-data1.xlsx]

## Sheet: Fig.6A KEGG 04380
KEGG mmu04380 (https://www.genome.jp/entry/pathway+mmu04380)
	Entry	Gene
Gene	12977	Csf1; colony stimulating factor 1 (macrophage) [KO:K05453]
	12978	Csf1r; colony stimulating factor 1 receptor [KO:K05090] [EC:2.7.10.1]
	14784	Grb2; growth factor receptor bound protein 2 [KO:K04364]
	26413	Mapk1; mitogen-activated protein kinase 1 [KO:K04371] [EC:2.7.11.24]
	26417	Mapk3; mitogen-activated protein kinase 3 [KO:K04371] [EC:2.7.11.24]
	18706	Pik3ca; phosphatidylinositol-4,5-bisphosphate 3-kinase catalytic subunit alpha [KO:K00922] [EC:2.7.1.153]
	18707	Pik3cd; phosphatidylinositol-4,5-bisphosphate 3-kinase catalytic subunit delta [KO:K00922] [EC:2.7.1.153]
	74769	Pik3cb; phosphatidylinositol-4,5-bisphosphate 3-kinase catalytic subunit beta [KO:K00922] [EC:2.7.1.153]
	18709	Pik3r2; phosphoinositide-3-kinase regulatory subunit 2 [KO:K02649]
	18708	Pik3r1; phosphoinositide-3-kinase regulatory subunit 1 [KO:K02649]
	18710	Pik3r3; phosphoinositide-3-kinase regulatory subunit 3 [KO:K02649]
	11651	Akt1; thymoma viral proto-oncogene 1 [KO:K04456] [EC:2.7.11.1]
	11652	Akt2; thymoma viral proto-oncogene 2 [KO:K04456] [EC:2.7.11.1]
	23797	Akt3; thymoma viral proto-oncogene 3 [KO:K04456] [EC:2.7.11.1]
	15978	Ifng; interferon gamma [KO:K04687]
	15979	Ifngr1; interferon gamma receptor 1 [KO:K05132]
	15980	Ifngr2; interferon gamma receptor 2 [KO:K05133]
	20846	Stat1; signal transducer and activator of transcription 1 [KO:K11220]
	16175	Il1a; interleukin 1 alpha [KO:K04383]
	16176	Il1b; interleukin 1 beta [KO:K04519]
	16177	Il1r1; interleukin 1 receptor, type I [KO:K04386]
	21926	Tnf; tumor necrosis factor [KO:K03156]
	21937	Tnfrsf1a; tumor necrosis factor receptor superfamily, member 1a [KO:K03158]
	21803	Tgfb1; transforming growth factor, beta 1 [KO:K13375]
	21808	Tgfb2; transforming growth factor, beta 2 [KO:K13376]
	21812	Tgfbr1; transforming growth factor, beta receptor I [KO:K04674] [EC:2.7.11.30]
	21813	Tgfbr2; transforming growth factor, beta receptor II [KO:K04388] [EC:2.7.11.30]
	21943	Tnfsf11; tumor necrosis factor (ligand) superfamily, member 11 [KO:K05473]
	21934	Tnfrsf11a; tumor necrosis factor receptor superfamily, member 11a, NFKB activator [KO:K05147]
	18383	Tnfrsf11b; tumor necrosis factor receptor superfamily, member 11b (osteoprotegerin) [KO:K05148]
	22030	Traf2; TNF receptor-associated factor 2 [KO:K03173] [EC:2.3.2.27]
	22034	Traf6; TNF receptor-associated factor 6 [KO:K03175] [EC:2.3.2.27]
	16818	Lck; lymphocyte protein tyrosine kinase [KO:K05856] [EC:2.7.10.2]
	14360	Fyn; Fyn proto-oncogene [KO:K05703] [EC:2.7.10.2]
	53859	Map3k14; mitogen-activated protein kinase kinase kinase 14 [KO:K04466] [EC:2.7.11.25]
	12675	Chuk; conserved helix-loop-helix ubiquitous kinase [KO:K04467] [EC:2.7.11.10]
	19698	Relb; avian reticuloendotheliosis viral (v-rel) oncogene related B [KO:K09253]
	18034	Nfkb2; nuclear factor of kappa light polypeptide gene enhancer in B cells 2, p49/p100 [KO:K04469]
	26409	Map3k7; mitogen-activated protein kinase kinase kinase 7 [KO:K04427] [EC:2.7.11.25]
	66513	Tab1; TGF-beta activated kinase 1/MAP3K7 binding protein 1 [KO:K04403]
	68652	Tab2; TGF-beta activated kinase 1/MAP3K7 binding protein 2 [KO:K04404]
	16151	Ikbkg; inhibitor of kappaB kinase gamma [KO:K07210]
	16150	Ikbkb; inhibitor of kappaB kinase beta [KO:K07209] [EC:2.7.11.10]
	18035	Nfkbia; nuclear factor of kappa light polypeptide gene enhancer in B cells inhibitor, alpha [KO:K04734]
	19697	Rela; v-rel reticuloendotheliosis viral oncogene homolog A (avian) [KO:K04735]
	18033	Nfkb1; nuclear factor of kappa light polypeptide gene enhancer in B cells 1, p105 [KO:K02580]
	18019	Nfatc2; nuclear factor of activated T cells, cytoplasmic, calcineurin dependent 2 [KO:K17332]
	18018	Nfatc1; nuclear factor of activated T cells, cytoplasmic, calcineurin dependent 1 [KO:K04446]
	15977	Ifnb1; interferon beta 1, fibroblast [KO:K05415]
	26395	Map2k1; mitogen-activated protein kinase kinase 1 [KO:K04368] [EC:2.7.12.2]
	26399	Map2k6; mitogen-activated protein kinase kinase 6 [KO:K04433] [EC:2.7.12.2]
	26416	Mapk14; mitogen-activated protein kinase 14 [KO:K04441] [EC:2.7.11.24]
	19094	Mapk11; mitogen-activated protein kinase 11 [KO:K04441] [EC:2.7.11.24]
	29857	Mapk12; mitogen-activated protein kinase 12 [KO:K04441] [EC:2.7.11.24]
	26415	Mapk13; mitogen-activated protein kinase 13 [KO:K04441] [EC:2.7.11.24]
	26400	Map2k7; mitogen-activated protein kinase kinase 7 [KO:K04431] [EC:2.7.12.2]
	26419	Mapk8; mitogen-activated protein kinase 8 [KO:K04440] [EC:2.7.11.24]
	26420	Mapk9; mitogen-activated protein kinase 9 [KO:K04440] [EC:2.7.11.24]
	26414	Mapk10; mitogen-activated protein kinase 10 [KO:K04440] [EC:2.7.11.24]
	14281	Fos; FBJ osteosarcoma oncogene [KO:K04379]
	14282	Fosb; FBJ osteosarcoma oncogene B [KO:K09029]
	14284	Fosl2; fos-like antigen 2 [KO:K09030]
	14283	Fosl1; fos-like antigen 1 [KO:K04502]
	16476	Jun; jun proto-oncogene [KO:K04448]
	16478	Jund; jun D proto-oncogene [KO:K04449]
	16477	Junb; jun B proto-oncogene [KO:K09028]
	19353	Rac1; Rac family small GTPase 1 [KO:K04392]
	237038	Nox1; NADPH oxidase 1 [KO:K08008]
	13057	Cyba; cytochrome b-245, alpha polypeptide [KO:K08009]
	17970	Ncf2; neutrophil cytosolic factor 2 [KO:K08010]
	17969	Ncf1; neutrophil cytosolic factor 1 [KO:K08011]
	17972	Ncf4; neutrophil cytosolic factor 4 [KO:K08012]
	12229	Btk; Bruton agammaglobulinemia tyrosine kinase [KO:K07370] [EC:2.7.10.2]
	21682	Tec; tec protein tyrosine kinase [KO:K07364] [EC:2.7.10.2]
	232790	Oscar; osteoclast associated receptor [KO:K14377]
	18722	Pira1; paired-Ig-like receptor A1 [KO:K06512]
	18726	Lilra6; leukocyte immunoglobulin-like receptor, subfamily A (with TM domain), member 6 [KO:K06512]
	18727	Pira4; paired-Ig-like receptor A4 [KO:K06512]
	18729	Pira6; paired-Ig-like receptor A6 [KO:K06512]
	18733	Pirb; paired Ig-like receptor B [KO:K06512]
	232801	Lilra5; leukocyte immunoglobulin-like receptor, subfamily A (with TM domain), member 5 [KO:K06512]
	14728	Lilrb4a; leukocyte immunoglobulin-like receptor, subfamily B, member 4A [KO:K06512]
	18724	Pira11; paired-Ig-like receptor A11 [KO:K06512]
	100038909	Pira12; paired-Ig-like receptor A12 [KO:K06512]
	18725	Pira2; paired-Ig-like receptor A2 [KO:K06512]
	100041146	Pira13; paired-Ig-like receptor A13 [KO:K06512]
	18730	Pira7; paired-Ig-like receptor A7 [KO:K06512]
	14129	Fcgr1; Fc receptor, IgG, high affinity I [KO:K06498]
	14130	Fcgr2b; Fc receptor, IgG, low affinity IIb [KO:K12560]
	14131	Fcgr3; Fc receptor, IgG, low affinity III [KO:K16824]
	246256	Fcgr4; Fc receptor, IgG, low affinity IV [KO:K06463]
	83433	Trem2; triggering receptor expressed on myeloid cells 2 [KO:K14378]
	19261	Sirpa; signal-regulatory protein alpha [KO:K06551]
	668101	Sirpb1b; signal-regulatory protein beta 1B [KO:K06551]
	100038947	Sirpb1c; signal-regulatory protein beta 1C [KO:K06551]
	751864	Gm9733; predicted gene 9733 [KO:K06551]
	320832	Sirpb1a; signal-regulatory protein beta 1A [KO:K06551]
	22177	Tyrobp; TYRO protein tyrosine kinase binding protein [KO:K07992]
	20963	Syk; spleen tyrosine kinase [KO:K05855] [EC:2.7.10.2]
	17060	Blnk; B cell linker [KO:K07371]
	16822	Lcp2; lymphocyte cytosolic protein 2 [KO:K07361]
	234779	Plcg2; phospholipase C, gamma 2 [KO:K05859] [EC:3.1.4.11]
	19057	Ppp3cc; protein phosphatase 3, catalytic subunit, gamma isoform [KO:K04348] [EC:3.1.3.16]
	19055	Ppp3ca; protein phosphatase 3, catalytic subunit, alpha isoform [KO:K04348] [EC:3.1.3.16]
	19056	Ppp3cb; protein phosphatase 3, catalytic subunit, beta isoform [KO:K04348] [EC:3.1.3.16]
	19058	Ppp3r1; protein phosphatase 3, regulatory subunit B, alpha isoform (calcineurin B, type I) [KO:K06268]
	19059	Ppp3r2; protein phosphatase 3, regulatory subunit B, alpha isoform (calcineurin B, type II) [KO:K06268]
	12326	Camk4; calcium/calmodulin-dependent protein kinase IV [KO:K05869] [EC:2.7.11.17]
	12912	Creb1; cAMP responsive element binding protein 1 [KO:K05870]
	20375	Spi1; spleen focus forming virus (SFFV) proviral integration oncogene [KO:K09438]
	17342	Mitf; melanogenesis associated transcription factor [KO:K09455]
	13038	Ctsk; cathepsin K [KO:K01371] [EC:3.4.22.38]
	11433	Acp5; acid phosphatase 5, tartrate resistant [KO:K14379] [EC:3.1.3.2]
	12311	Calcr; calcitonin receptor [KO:K04576]
	16416	Itgb3; integrin beta 3 [KO:K06493]
	19016	Pparg; peroxisome proliferator activated receptor gamma [KO:K08530]
	15975	Ifnar1; interferon (alpha and beta) receptor 1 [KO:K05130]
	15976	Ifnar2; interferon (alpha and beta) receptor 2 [KO:K05131]
	16451	Jak1; Janus kinase 1 [KO:K11217] [EC:2.7.10.2]
	54721	Tyk2; tyrosine kinase 2 [KO:K11219] [EC:2.7.10.2]
	20847	Stat2; signal transducer and activator of transcription 2 [KO:K11221]
	16391	Irf9; interferon regulatory factor 9 [KO:K04693]
	12703	Socs1; suppressor of cytokine signaling 1 [KO:K04694]
	12702	Socs3; suppressor of cytokine signaling 3 [KO:K04696]
	14389	Gab2; growth factor receptor bound protein 2-associated protein 2 [KO:K08091]
	14200	Fhl2; four and a half LIM domains 2 [KO:K14380]
	74256	Cyld; CYLD lysine 63 deubiquitinase [KO:K08601] [EC:3.4.19.12]
	18412	Sqstm1; sequestosome 1 [KO:K14381]

## Sheet: Fig.6A-common genes
	#	Gene Name	Gene Ensembl id	Interactions	Tarbase Methods
		1	Mapk14	ENSMUSG00000053436	HITS-CLIP
		2	Irf9	ENSMUSG00000002325	HITS-CLIP
		3	Pik3r1	ENSMUSG00000041417	HITS-CLIP
		4	Pik3r3	ENSMUSG00000028698	HITS-CLIP
		5	Stat2	ENSMUSG00000040033	Multiple
		6	Stat1	ENSMUSG00000026104	HITS-CLIP		Fig. S9. Mouse genetic model for Dermo1-Cre-mediated expression of GATA3 in the skeletogenic mesenchyme.
		7	Ifngr1	ENSMUSG00000020009	HITS-CLIP
		8	Ctsk	ENSMUSG00000028111	HITS-CLIP
		9	Creb1	ENSMUSG00000025958	Multiple
		10	Junb	ENSMUSG00000052837	HITS-CLIP
		11	Grb2	ENSMUSG00000059923	Multiple
		12	Sqstm1	ENSMUSG00000015837	Multiple
		13	Tgfbr1	ENSMUSG00000007613	Multiple
		14	Ppp3cb	ENSMUSG00000021816	HITS-CLIP
		15	Camk4	ENSMUSG00000038128	HITS-CLIP
		16	Jak1	ENSMUSG00000028530	Multiple
		17	Map2k7	ENSMUSG00000002948	HITS-CLIP
		18	Ifng	ENSMUSG00000055170	Multiple
		19	Nfkb1	ENSMUSG00000028163	Multiple
		20	Fyn	ENSMUSG00000019843	Multiple
		21	Ppp3r1	ENSMUSG00000033953	HITS-CLIP
		22	Traf6	ENSMUSG00000027164	HITS-CLIP
		23	Pparg	ENSMUSG00000000440
		24	Cyld	ENSMUSG00000036712	HITS-CLIP
		25	Nfatc2	ENSMUSG00000027544	HITS-CLIP
		26	Mapk8	ENSMUSG00000021936	HITS-CLIP

## Sheet: Fig.6B
	Cq of each assay
OC Sample	GAPDH	Gtnrb1	Stat1	MapK8	Snx10	Efna2	Csf1	Efna4	Irfq	Stat2	Map2K7	Cyld	Jak1
Control-1	25.1979	26.7207	27.6174	27.3643	25.7477	27.5491	26.0932	34.384	30.3761	27.0601	36.6594	27.1049	26.2618
Control-2	25.0974	25.5305	27.4388	27.2635	25.6506	27.9625	26.5748	33.4924	30.0897	26.9014	38.692	27.2703	25.9935
Control-3	24.9601	25.6321	27.6765	27.5147	25.9758	27.6283	26.1229	33.0094	30.3182	27.0872	36.4378	27.4347	25.9015
∆Mir27a-1	24.5314	24.857	27.5543	27.1341	23.1323	27.6629	26.2463	34.1728	28.7273	27.1017	34.8501	27.9728	25.4337
∆Mir27a-2	24.4885	24.9452	28.1788	27.3333	23.2436	27.6108	26.3283	33.7292	29.3038	27.0985	34.9145	27.7536	25.3729
∆Mir27a-3	24.1186	25.5538	28.0743	27.2956	23.1368	27.3725	26.3474	34.6417	29.1856	27.0464	34.501	28.0239	25.3826
	Cq of each assay
OC Sample	GAPDH	Mapk14	Nfkb1	Junb	Fyn	Trafb	Grb2	Ctsk	Camk4	Mitf	Tgfbr1	Nfatc2	Pik3r3	Ppp3r1	Pik3r1
Control-1	24.9238	27.1366	27.3954	29.1564	27.2146	27.4075	27.936	24.8368	29.1848	27.5087	27.8099	27.3971	27.2378	27.1503	27.7794
Control-2	24.863	27.0978	27.364	28.9527	27.3631	27.4574	27.9472	24.9546	29.0519	27.2366	27.5319	27.3964	27.0764	27.0221	27.7679
Control-3	24.7689	27.1306	27.5524	28.9445	27.3046	27.4873	27.7976	24.722	29.0855	27.4897	27.6633	27.2034	27.1589	27.1009	27.7857
∆Mir27a-1	24.4212	26.6417	26.9036	28.042	27.4877	27.0487	27.3388	21.5005	29.113	26.7854	26.2951	27.2403	27.0815	26.3143	27.3184
∆Mir27a-2	24.2094	26.7768	27.0412	27.9919	27.6043	27.0468	27.335	21.5165	29.1943	26.6704	26.3016	27.4393	27.1087	26.3857	27.3266
∆Mir27a-3	24.119	26.6746	26.9852	28.0798		27.0701	28.2511	21.4655	29.1227	26.7032	26.2242	27.3932	27.3053	26.3445	27.3469
	Cq of each assay
OC Sample	GAPDH	Creb1	Ppp3cb	Ifngr1
Control-1	24.4558	28.0364	27.0815	26.3656
Control-2	24.2687	28.1819	27.2178	26.3349
Control-3	24.1744	28.0982	26.8447	26.2566
∆Mir27a-1	23.5008	28.4212	26.9851	25.4915
∆Mir27a-2	23.7145	28.3459	27.0311	25.4295
∆Mir27a-3	23.6634	28.3337	27.1189	25.318

## Sheet: Fig.6C
		Sample #1	Sample #2	Sample #3
	Tgfbr1 + control plasmid	0.220005	0.216073	0.214667
	Tgfbr1 + MIR27a	0.135793	0.132711	0.130329
	Snx10 + control plasmid	0.304334	0.298481	0.29811
	Snx10+ MIR27a	0.245082	0.242493	0.246218
	Cathepsin K + control plasmid	0.217829	0.216917	0.213064
	Cathepsin K+ MIR27a	0.220332	0.221347	0.212759
	Map2k7 + control plasmid	0.327293	0.314802	0.312581
	Map2k7 + MIR27a	0.274452	0.271146	0.267788
	P62 + control plasmid	0.507907	0.490714	0.463851
	P62 + MIR27a	0.274452	0.271146	0.267788

## Sheet: Fig.6D
Sample	Lentivirus	OC number
WT-#1	Scramble	94
WT-#2	Scramble	58
WT-#3	Scramble	36
WT-#4	Scramble	77
WT-#5	Scramble	62
∆Mir27a-#1	Scramble	178
∆Mir27a-#2	Scramble	173
∆Mir27a-#3	Scramble	230
∆Mir27a-#4	Scramble	243
∆Mir27a-#5	Scramble	148
∆Mir27a-#6	P62 shRNA	114
∆Mir27a-#7	P62 shRNA	52
∆Mir27a-#8	P62 shRNA	43
∆Mir27a-#9	P62 shRNA	72
∆Mir27a-#10	P62 shRNA	49

## Sheet: Fig.6E
Cells	Virus	sample number	Unresorpted area (mm^2)
∆Mir27a (Undifferentiated)	Scramble	#1	1.725
∆Mir27a (Undifferentiated)	Scramble	#2	1.744
∆Mir27a (Undifferentiated)	Scramble	#3	1.7
Control	Scramble	#1	1.254
Control	Scramble	#2	1.076
Control	Scramble	#3	1.459
Control	Scramble	#4	0.874
Control	Scramble	#5	1.312
Control	Scramble	#6	1.549
∆Mir27a	Scramble	#1	1.485
∆Mir27a	Scramble	#2	1.629
∆Mir27a	Scramble	#3	1.582
∆Mir27a	Scramble	#4	1.611
∆Mir27a	Scramble	#5	1.575
∆Mir27a	Scramble	#6	1.59
∆Mir27a	p62 shRNA	#1	1.423
∆Mir27a	p62 shRNA	#2	1.51
∆Mir27a	p62 shRNA	#3	1.434
∆Mir27a	p62 shRNA	#4	1.543
∆Mir27a	p62 shRNA	#5	1.363
∆Mir27a	p62 shRNA	#6	1.441

## Sheet: Fig.6F
Cells	Virus	Days of culture	Gene detected	Quantification cycle			Cells	Virus	Days of culture	Gene detected	Quantification cycle
∆Mir27a	Scramble	3	Gapdh	23.6784			∆Mir27a	Scramble	7	Gapdh	23.3586
∆Mir27a	Scramble	3	Gapdh	23.6806			∆Mir27a	Scramble	7	Gapdh	23.2897
∆Mir27a	Scramble	3	Gapdh	23.6249			∆Mir27a	Scramble	7	Gapdh	23.3293
∆Mir27a	p62 shRNA	3	Gapdh	23.5221			∆Mir27a	p62 shRNA	7	Gapdh	24.5088
∆Mir27a	p62 shRNA	3	Gapdh	23.4496			∆Mir27a	p62 shRNA	7	Gapdh	24.4641
∆Mir27a	p62 shRNA	3	Gapdh	23.4558			∆Mir27a	p62 shRNA	7	Gapdh	24.4667
∆Mir27a	Scramble	3	Dcstamp	25.576			∆Mir27a	Scramble	7	Ctsk	19.9852
∆Mir27a	Scramble	3	Dcstamp	25.6809			∆Mir27a	Scramble	7	Ctsk	19.9041
∆Mir27a	Scramble	3	Dcstamp	25.6609			∆Mir27a	Scramble	7	Ctsk	19.9779
∆Mir27a	p62 shRNA	3	Dcstamp	25.38			∆Mir27a	p62 shRNA	7	Ctsk	21.7755
∆Mir27a	p62 shRNA	3	Dcstamp	25.385			∆Mir27a	p62 shRNA	7	Ctsk	21.7648
∆Mir27a	p62 shRNA	3	Dcstamp	25.3538			∆Mir27a	p62 shRNA	7	Ctsk	21.7591
∆Mir27a	Scramble	3	Rank	26.8696			∆Mir27a	Scramble	7	Calcr	28.8478
∆Mir27a	Scramble	3	Rank	27.0089			∆Mir27a	Scramble	7	Calcr	28.8257
∆Mir27a	Scramble	3	Rank	26.8537			∆Mir27a	Scramble	7	Calcr	28.8344
∆Mir27a	p62 shRNA	3	Rank	27.1193			∆Mir27a	p62 shRNA	7	Calcr	30.5684
∆Mir27a	p62 shRNA	3	Rank	27.0315			∆Mir27a	p62 shRNA	7	Calcr	30.5761
∆Mir27a	p62 shRNA	3	Rank	26.9858			∆Mir27a	p62 shRNA	7	Calcr	30.5625
Control	Scramble	3	Gapdh	23.7775			Control	Scramble	7	Gapdh	23.2894
Control	Scramble	3	Gapdh	23.8101			Control	Scramble	7	Gapdh	23.3187
Control	Scramble	3	Gapdh	23.8164			Control	Scramble	7	Gapdh	23.3013
Control	Scramble	3	Dcstamp	26.1133			Control	Scramble	7	Ctsk	20.6537
Control	Scramble	3	Dcstamp	26.0791			Control	Scramble	7	Ctsk	20.6064
Control	Scramble	3	Dcstamp	26.0294			Control	Scramble	7	Ctsk	20.5455
Control	Scramble	3	Rank	27.4603			Control	Scramble	7	Calcr	29.9564
Control	Scramble	3	Rank	27.4803			Control	Scramble	7	Calcr	29.9309
Control	Scramble	3	Rank	27.5283			Control	Scramble	7	Calcr	29.767
